# Supplementary material for: Ongoing resolution of duplicate gene functions shapes the diversification of a metabolic network
Source: eLife. 2016 Sep 30;5:e19027. doi: 10.7554/eLife.19027 (PMC5089864; doi:10.7554/eLife.19027)
Supplement: Figure 5—source data 1. — DOI: http://dx.doi.org/10.7554/eLife.19027.017 [file elife-19027-fig5-data1.xlsx]

## Sheet: 4h-TGA
Differentially expressed genes in S. uvarum gal80∆ gal80b∆ relative to wild-type at TGA at FDR=0.05 by EBSeq
Suva Name	Posterior Probablity of Differentially Expressed	Real Fold Changes (WT/Mutant)	Scer Ortholog	Scer Name	Mutant/WT at TGA	Mutant/WT ratios at Mid-log	ScerAnnotation
Sbay_15.323	1	0.00386209	YHR126C	ANS1	258.927	1	Putative GPI protein; transcription dependent upon Azf1p
Sbay_4.555	1	0.00785621	NA	NA	127.288	1	NA
Sbay_10.403	1	0.00837947	YLR307C-A		119.339	1	Putative protein of unknown function
Sbay_4.293	1	0.0108398	YBR056W-A		92.2523	1	Protein of unknown function; mRNA identified as translated by ribosome profiling data; partially overlaps the dubious ORF YBR056C-B
Sbay_14.196	1	0.0170237	YNL142W	MEP2	58.7416	0.134641	Ammonium permease involved in regulation of pseudohyphal growth; belongs to a ubiquitous family of cytoplasmic membrane proteins that transport only ammonium (NH4+); expression is under the nitrogen catabolite repression regulation
Sbay_13.286	1	0.0174322	YMR107W	SPG4	57.365	1	Protein required for survival at high temperature during stationary phase; not required for growth on nonfermentable carbon sources
Sbay_14.4	1	0.0207002	NA	NA	48.3088	1	NA
Sbay_2.192	1	0.0209807	Anc_3.267	NA	47.6629	1	NA
Sbay_12.181	1	0.0210677	YJR094C	IME1	47.466	1	Master regulator of meiosis that is active only during meiotic events, activates transcription of early meiotic genes through interaction with Ume6p, degraded by the 26S proteasome following phosphorylation by Ime2p
Sbay_8.36	1	0.021194	YHL016C	DUR3	47.1833	1	Plasma membrane transporter for both urea and polyamines, expression is highly sensitive to nitrogen catabolite repression and induced by allophanate, the last intermediate of the allantoin degradative pathway
Sbay_13.436	1	0.0220483	YMR251W-A	HOR7	45.3549	1	Protein of unknown function; overexpression suppresses Ca2+ sensitivity of mutants lacking inositol phosphorylceramide mannosyltransferases Csg1p and Csh1p; transcription is induced under hyperosmotic stress and repressed by alpha factor; HOR7 has a paralog, DDR2, that arose from the whole genome duplication
Sbay_9.244	1	0.0230373	YIR028W	DAL4	43.4079	1	Allantoin permease; expression sensitive to nitrogen catabolite repression and induced by allophanate, an intermediate in allantoin degradation
Sbay_10.447	1	0.0270621	YLR346C		36.952	1	Putative protein of unknown function found in mitochondria; expression is regulated by transcription factors involved in pleiotropic drug resistance, Pdr1p and Yrr1p; YLR346C is not an essential gene
Sbay_7.528	1	0.0271448	YGR236C	SPG1	36.8395	1	Protein required for survival at high temperature during stationary phase; not required for growth on nonfermentable carbon sources; the authentic, non-tagged protein is detected in highly purified mitochondria in high-throughput studies
Sbay_11.266	1	0.0284038	YKR034W	DAL80	35.2066	1	Negative regulator of genes in multiple nitrogen degradation pathways; expression is regulated by nitrogen levels and by Gln3p; member of the GATA-binding family, forms homodimers and heterodimers with Gzf3p; DAL80 has a paralog, GZF3, that arose from the whole genome duplication
Sbay_5.192	1	0.0287859	YER079W		34.7393	1	Putative protein of unknown function
Sbay_15.291	1	0.0288656	NA	NA	34.6433	1	NA
Sbay_13.222	1	0.0400362	NA	NA	24.9774	1	NA
Sbay_13.20	1	0.0403185	YML123C	PHO84	24.8025	0.291998	High-affinity inorganic phosphate (Pi) transporter and low-affinity manganese transporter; regulated by Pho4p and Spt7p; mutation confers resistance to arsenate; exit from the ER during maturation requires Pho86p; cells overexpressing Pho84p accumulate heavy metals but do not develop symptoms of metal toxicity
Sbay_8.81	1	0.0412063	YOR028C	CIN5	24.2681	1	Basic leucine zipper (bZIP) transcription factor of the yAP-1 family; physically interacts with the Tup1-Cyc8 complex and recruits Tup1p to its targets; mediates pleiotropic drug resistance and salt tolerance; nuclearly localized under oxidative stress and sequestered in the cytoplasm by Lot6p under reducing conditions; CIN5 has a paralog, YAP6, that arose from the whole genome duplication
Sbay_3.35	1	0.0438777	YCR010C	ADY2	22.7906	1	Acetate transporter required for normal sporulation; phosphorylated in mitochondria; ADY2 has a paralog, ATO2, that arose from the whole genome duplication
Sbay_14.179	1	0.0456356	YNL160W	YGP1	21.9127	1	Cell wall-related secretory glycoprotein; induced by nutrient deprivation-associated growth arrest and upon entry into stationary phase; may be involved in adaptation prior to stationary phase entry; has similarity to Sps100p
Sbay_16.475	1	0.0464084	YPR145C-A		21.5478	1	Putative protein of unknown function
Sbay_3.164	1	0.0472227	YCL048W-A		21.1762	1	Putative protein of unknown function; YCL048W-A has a paralog, YDR524C-B, that arose from the whole genome duplication
Sbay_2.169	1	0.0490646	YDR019C	GCV1	20.3813	1	T subunit of the mitochondrial glycine decarboxylase complex, required for the catabolism of glycine to 5,10-methylene-THF; expression is regulated by levels of levels of 5,10-methylene-THF in the cytoplasm
Sbay_14.419	1	0.052864	YNR060W	FRE4	18.9165	1	Ferric reductase, reduces a specific subset of siderophore-bound iron prior to uptake by transporters; expression induced by low iron levels
Sbay_7.451	1	0.0558437	YGR161C	RTS3	17.9071	1	Putative component of the protein phosphatase type 2A complex
Sbay_14.390	1	0.0562282	YNR034W-A		17.7847	0.230729	Putative protein of unknown function; expression is regulated by Msn2p/Msn4p; YNR034W-A has a paralog, YCR075W-A, that arose from the whole genome duplication
Sbay_8.388	1	0.0569944	YOR338W		17.5456	1	Putative protein of unknown function; YOR338W transcription is regulated by Azf1p and its transcript is a specific target of the G protein effector Scp160p; identified as being required for sporulation in a high-throughput mutant screen; YOR338W has a paralog, FUN19, that arose from the whole genome duplication
Sbay_13.370	1	0.0599169	YMR189W	GCV2	16.6898	1	P subunit of the mitochondrial glycine decarboxylase complex, required for the catabolism of glycine to 5,10-methylene-THF; expression is regulated by levels of 5,10-methylene-THF in the cytoplasm
Sbay_13.509	1	0.0622328	YMR316W	DIA1	16.0687	1	Protein of unknown function, involved in invasive and pseudohyphal growth; green fluorescent protein (GFP)-fusion protein localizes to the cytoplasm in a punctate pattern
Sbay_6.292	1	0.0625363	NA	NA	15.9907	1	NA
Sbay_13.355	1	0.0628004	YMR174C	PAI3	15.9235	1	Cytoplasmic proteinase A (Pep4p) inhibitor, dependent on Pbs2p and Hog1p protein kinases for osmotic induction; intrinsically unstructured, N-terminal half becomes ordered in the active site of proteinase A upon contact
Sbay_3.25	1	0.0628666	YCR005C	CIT2	15.9067	0.197151	Citrate synthase; catalyzes the condensation of acetyl coenzyme A and oxaloacetate to form citrate, peroxisomal isozyme involved in glyoxylate cycle; expression is controlled by Rtg1p and Rtg2p transcription factors; CIT2 has a paralog, CIT1, that arose from the whole genome duplication
Sbay_14.301	1	0.0630305	YNL036W	NCE103	15.8653	1	Carbonic anhydrase; metalloenzyme that catalyzes CO2 hydration to bicarbonate, which is an important metabolic substrate, and protons; not expressed under conditions of high CO2, such as inside a growing colony, but transcription is induced in response to low CO2 levels, such as on the colony surface in ambient air; poorly transcribed under aerobic conditions and at an undetectable level under an…
Sbay_3.52	1	0.063534	YCR021C	HSP30	15.7396	0.20174	Hydrophobic plasma membrane localized, stress-responsive protein that negatively regulates the H(+)-ATPase Pma1p; induced by heat shock, ethanol treatment, weak organic acid, glucose limitation, and entry into stationary phase
Sbay_11.139	1	0.0652947	YKL086W	SRX1	15.3152	1	Sulfiredoxin; contributes to oxidative stress resistance by reducing cysteine-sulfinic acid groups in the peroxiredoxin Tsa1p, which is formed upon exposure to oxidants; conserved in higher eukaryotes; protein abundance increases in response to DNA replication stress
Sbay_8.3	1	0.0657313	NA	NA	15.2134	1	NA
Sbay_11.316	1	0.0676695	YKR080W	MTD1	14.7777	1	NAD-dependent 5,10-methylenetetrahydrafolate dehydrogenase, plays a catalytic role in oxidation of cytoplasmic one-carbon units; expression is regulated by Bas1p and Bas2p, repressed by adenine, and may be induced by inositol and choline
Sbay_7.151	1	0.0681959	YGL117W		14.6636	1	Putative protein of unknown function
Sbay_3.28	1	0.0702522	NA	NA	14.2344	0.369439	NA
Sbay_15.333	1	0.0749904	YHR136C	SPL2	13.335	1	Protein with similarity to cyclin-dependent kinase inhibitors; downregulates low-affinity phosphate transport during phosphate limitation; overproduction suppresses a plc1 null mutation; GFP-fusion protein localizes to the cytoplasm
Sbay_13.219	1	0.0765477	NA	NA	13.0637	1	NA
Sbay_13.299	1	0.0784666	YMR120C	ADE17	12.7443	1	Enzyme of 'de novo' purine biosynthesis; contains both 5-aminoimidazole-4-carboxamide ribonucleotide transformylase and inosine monophosphate cyclohydrolase activities; ADE17 has a paralog, ADE16, that arose from the whole genome duplication; ade16 ade17 mutants require adenine and histidine
Sbay_13.350	1	0.0810817	YMR169C	ALD3	12.3332	0.457826	Cytoplasmic aldehyde dehydrogenase, involved in beta-alanine synthesis; uses NAD+ as the preferred coenzyme; very similar to Ald2p; expression is induced by stress and repressed by glucose
Sbay_1.20	1	0.0824234	YAL044C	GCV3	12.1325	1	H subunit of the mitochondrial glycine decarboxylase complex, required for the catabolism of glycine to 5,10-methylene-THF; also required for all protein lipoylation; expression is regulated by levels of 5,10-methylene-THF
Sbay_7.56	1	0.0838517	YGL205W	POX1	11.9258	1	Fatty-acyl coenzyme A oxidase, involved in the fatty acid beta-oxidation pathway; localized to the peroxisomal matrix
Sbay_4.556	1	0.0845355	NA	NA	11.8294	1	NA
Sbay_13.220	1	0.0854792	NA	NA	11.6987	1	NA
Sbay_16.319	1	0.0878187	YPR001W	CIT3	11.3871	1	Dual specificity mitochondrial citrate and methylcitrate synthase; catalyzes the condensation of acetyl-CoA and oxaloacetate to form citrate and that of propionyl-CoA and oxaloacetate to form 2-methylcitrate
Sbay_11.2	1	0.088579	NA	NA	11.2894	1	NA
Sbay_3.150	1	0.0888291	YCL064C	CHA1	11.2576	1	Catabolic L-serine (L-threonine) deaminase, catalyzes the degradation of both L-serine and L-threonine; required to use serine or threonine as the sole nitrogen source, transcriptionally induced by serine and threonine
Sbay_2.200	1	0.0911372	YDR043C	NRG1	10.9725	1	Transcriptional repressor; recruits the Cyc8p-Tup1p complex to promoters; mediates glucose repression and negatively regulates a variety of processes including filamentous growth and alkaline pH response; NRG1 has a paralog, NRG2, that arose from the whole genome duplication
Sbay_16.259	1	0.0923146	YPL054W	LEE1	10.8325	1	Zinc-finger protein of unknown function
Sbay_13.377	1	0.0934642	YMR195W	ICY1	10.6993	1	Protein of unknown function, required for viability in rich media of cells lacking mitochondrial DNA; mutants have an invasive growth defect with elongated morphology; induced by amino acid starvation
Sbay_2.186	1	0.0943609	YDR033W	MRH1	10.5976	0.0714539	Protein that localizes primarily to the plasma membrane; also found at the nuclear envelope; the authentic, non-tagged protein is detected in mitochondria in a phosphorylated state; MRH1 has a paralog, YRO2, that arose from the whole genome duplication
Sbay_10.229	1	0.0945726	YLR136C	TIS11	10.5739	0.0661381	mRNA-binding protein expressed during iron starvation; binds to a sequence element in the 3'-untranslated regions of specific mRNAs to mediate their degradation; involved in iron homeostasis; protein increases in abundance and relative distribution to the nucleus increases upon DNA replication stress
Sbay_2.135	1	0.0967409	YBR006W	UGA2	10.3369	1	Succinate semialdehyde dehydrogenase involved in the utilization of gamma-aminobutyrate (GABA) as a nitrogen source; part of the 4-aminobutyrate and glutamate degradation pathways; localized to the cytoplasm
Sbay_6.214	1	0.0974173	YJL133C-A		10.2651	0.401229	Putative protein of unknown function; the authentic, non-tagged protein is detected in highly purified mitochondria in high-throughput studies
Sbay_1.3	1	0.0978531	NA	NA	10.2194	1	NA
Sbay_7.5	1	0.0996334	NA	NA	10.0368	1	NA
Sbay_11.182	1	0.100064	YKL043W	PHD1	9.99357	0.462475	Transcriptional activator that enhances pseudohyphal growth; physically interacts with the Tup1-Cyc8 complex and recruits Tup1p to its targets; regulates expression of FLO11, an adhesin required for pseudohyphal filament formation; similar to StuA, an A. nidulans developmental regulator; potential Cdc28p substrate; PHD1 has a paralog, SOK2, that arose from the whole genome duplication
Sbay_1.1	1	0.101728	NA	NA	9.83018	1	NA
Sbay_7.370	1	0.102886	YGR088W	CTT1	9.71948	1	Cytosolic catalase T, has a role in protection from oxidative damage by hydrogen peroxide
Sbay_7.4	0.999998	0.104532	NA	NA	9.56649	1	NA
Sbay_4.408	1	0.105119	YBR157C	ICS2	9.51303	1	Protein of unknown function; null mutation does not confer any obvious defects in growth, spore germination, viability, or carbohydrate utilization
Sbay_12.249	1	0.105444	NA	NA	9.48374	1	NA
Sbay_10.529	1	0.107307	YLR413W		9.31909	3.23551	Putative protein of unknown function; YLR413W is not an essential gene
Sbay_15.335	1	0.107978	YHR138C		9.26117	1	Protein of unknown function; similar to Pbi2p; double null mutant lacking Pbi2p and Yhr138cp exhibits highly fragmented vacuoles; protein abundance increases in response to DNA replication stress
Sbay_4.283	1	0.108576	YBR050C	REG2	9.21017	1	Regulatory subunit of the Glc7p type-1 protein phosphatase; involved with Reg1p, Glc7p, and Snf1p in regulation of glucose-repressible genes, also involved in glucose-induced proteolysis of maltose permease
Sbay_7.272	1	0.113575	YGL009C	LEU1	8.80473	1	Isopropylmalate isomerase, catalyzes the second step in the leucine biosynthesis pathway
Sbay_5.172	1	0.11361	YER062C	HOR2	8.80204	1	Glycerol-1-phosphatase involved in glycerol biosynthesis; induced in response to hyperosmotic or oxidative stress, and during diauxic shift; HOR2 has a paralog, RHR2, that arose from the whole genome duplication
Sbay_4.214	1	0.114202	NA	NA	8.75642	1	NA
Sbay_5.34	1	0.114232	YEL035C	UTR5	8.75414	1	Protein of unknown function; transcription may be regulated by Gcr1p; essential for growth under standard (aerobic) conditions but not under anaerobic conditions
Sbay_4.10	1	0.114482	YDL234C	GYP7	8.73503	1	GTPase-activating protein for yeast Rab family members including: Ypt7p (most effective), Ypt1p, Ypt31p, and Ypt32p (in vitro); involved in vesicle mediated protein trafficking
Sbay_2.447	1	0.118421	YDR281C	PHM6	8.44444	1	Protein of unknown function, expression is regulated by phosphate levels
Sbay_2.106	1	0.118847	NA	NA	8.41419	1	NA
Sbay_5.171	1	0.120065	YER061C	CEM1	8.3288	1	Mitochondrial beta-keto-acyl synthase with possible role in fatty acid synthesis; required for mitochondrial respiration
Sbay_7.6	1	0.120519	YGL255W	ZRT1	8.29742	0.785524	High-affinity zinc transporter of the plasma membrane, responsible for the majority of zinc uptake; transcription is induced under low-zinc conditions by the Zap1p transcription factor
Sbay_11.67	1	0.123331	YKL159C	RCN1	8.10828	1	Protein involved in calcineurin regulation during calcium signaling; has similarity to H. sapiens DSCR1 which is found in the Down Syndrome candidate region
Sbay_11.129	1	0.123921	YKL096W	CWP1	8.06964	1	Cell wall mannoprotein that localizes specifically to birth scars of daughter cells, linked to a beta-1,3- and beta-1,6-glucan heteropolymer through a phosphodiester bond; required for propionic acid resistance
Sbay_2.42	1	0.126951	YBL078C	ATG8	7.87707	0.511992	Component of autophagosomes and Cvt vesicles; unique ubiquitin-like protein whose conjugation target is the lipid phosphatidylethanolamine (PE); Atg8p-PE is anchored to membranes, is involved in phagophore expansion, and may mediate membrane fusion during autophagosome formation; deconjugation of Atg8p-PE is required for efficient autophagosome biogenesis
Sbay_14.10	1	0.127596	NA	NA	7.83725	1	NA
Sbay_1.2	1	0.127745	NA	NA	7.82807	1	NA
Sbay_11.273	1	0.128567	YKR039W	GAP1	7.77805	1	General amino acid permease; Gap1p senses the presence of amino acid substrates to regulate localization to the plasma membrane when needed; essential for invasive growth
Sbay_12.2	1	0.128786	NA	NA	7.76481	1	NA
Sbay_4.227	1	0.132104	YDL021W	GPM2	7.5698	0.340331	Homolog of Gpm1p phosphoglycerate mutase, which converts 3-phosphoglycerate to 2-phosphoglycerate in glycolysis; may be non-functional derivative of a gene duplication event
Sbay_10.494	1	0.132677	YLR377C	FBP1	7.5371	1	Fructose-1,6-bisphosphatase, key regulatory enzyme in the gluconeogenesis pathway, required for glucose metabolism; undergoes either proteasome-mediated or autophagy-mediated degradation depending on growth conditions; interacts with Vid30p
Sbay_11.283	1	0.133519	YKR049C	FMP46	7.48956	1	Putative redox protein containing a thioredoxin fold; the authentic, non-tagged protein is detected in highly purified mitochondria in high-throughput studies
Sbay_6.46	1	0.135877	YFL014W	HSP12	7.35962	1	Plasma membrane protein involved in maintaining membrane organization in stress conditions; induced by heat shock, oxidative stress, osmostress, stationary phase, glucose depletion, oleate and alcohol; protein abundance increased in response to DNA replication stress and dietary restriction; regulated by the HOG and Ras-Pka pathways; required for dietary restriction-induced lifespan extension
Sbay_10.381	1	0.137029	YLR286C	CTS1	7.29772	0.233642	Endochitinase, required for cell separation after mitosis; transcriptional activation during the G1 phase of the cell cycle is mediated by transcription factor Ace2p
Sbay_14.197	1	0.137088	YNL141W	AAH1	7.29457	1	Adenine deaminase (adenine aminohydrolase), converts adenine to hypoxanthine; involved in purine salvage; transcriptionally regulated by nutrient levels and growth phase; Aah1p degraded upon entry into quiescence via SCF and the proteasome
Sbay_13.376	1	0.139496	YMR194C-B	CMC4	7.16864	1	Protein that localizes to the mitochondrial intermembrane space via the Mia40p-Erv1p system; contains twin cysteine-x(9)-cysteine motifs
Sbay_9.141	1	0.140642	YIL057C	RGI2	7.11026	0.249047	Protein of unknown function involved in energy metabolism under respiratory conditions; expression induced under carbon limitation and repressed under high glucose
Sbay_9.122	1	0.142115	NA	NA	7.03654	1	NA
Sbay_14.145	1	0.145	YNL196C	SLZ1	6.89657	1	Sporulation-specific protein with a leucine zipper motif
Sbay_2.628	1	0.145295	YDR453C	TSA2	6.88255	1	Stress inducible cytoplasmic thioredoxin peroxidase; cooperates with Tsa1p in the removal of reactive oxygen, nitrogen and sulfur species using thioredoxin as hydrogen donor; deletion enhances the mutator phenotype of tsa1 mutants; protein abundance increases in response to DNA replication stress
Sbay_14.146	1	0.145706	YNL195C		6.86312	1	Putative protein of unknown function; shares a promoter with YNL194C; the authentic, non-tagged protein is detected in highly purified mitochondria in high-throughput studies
Sbay_10.138	1	0.146002	YLR054C	OSW2	6.84924	1	Protein of unknown function proposed to be involved in the assembly of the spore wall
Sbay_10.7	0.999994	0.14651	NA	NA	6.82546	1	NA
Sbay_10.130	0.999102	0.147487	YLR046C		6.78025	1	Putative membrane protein; member of the fungal lipid-translocating exporter (LTE) family of proteins; transcription is activated by paralogous transcription factors Yrm1p and Yrr1p along with genes involved in multidrug resistance
Sbay_7.300	1	0.147557	YGR019W	UGA1	6.77705	0.492742	Gamma-aminobutyrate (GABA) transaminase; also known as 4-aminobutyrate aminotransferase; involved in the 4-aminobutyrate and glutamate degradation pathways; required for normal oxidative stress tolerance and nitrogen utilization; protein abundance increases in response to DNA replication stress
Sbay_7.531	1	0.148638	YGR239C	PEX21	6.72775	1	Peroxin required for peroxisomal matrix protein targeting; acts on proteins containing the PTS2 targeting sequence; interacts with Pex7p; partially redundant with Pex18p; relative distribution to cytoplasmic foci increases upon DNA replication stress
Sbay_4.212	1	0.151137	NA	NA	6.6165	1	NA
Sbay_4.77	1	0.151719	YDL169C	UGX2	6.59114	1	Protein of unknown function, transcript accumulates in response to any combination of stress conditions
Sbay_3.147	1	0.151752	NA	NA	6.58971	1	NA
Sbay_13.349	1	0.15272	YMR170C	ALD2	6.54794	0.350497	Cytoplasmic aldehyde dehydrogenase, involved in ethanol oxidation and beta-alanine biosynthesis; uses NAD+ as the preferred coenzyme; expression is stress induced and glucose repressed; very similar to Ald3p
Sbay_12.1	1	0.15336	NA	NA	6.52062	1	NA
Sbay_5.138	1	0.153927	YER039C	HVG1	6.4966	0.461522	Protein of unknown function, has homology to Vrg4p
Sbay_8.353	1	0.155231	Anc_8.775	NA	6.442	1	NA
Sbay_6.224	1	0.156065	YJL144W		6.40761	1	Cytoplasmic hydrophilin essential in dessication-rehydration process; expression induced by osmotic stress, starvation and during stationary phase; protein abundance increases in response to DNA replication stress
Sbay_16.1	1	0.156417	NA	NA	6.39317	0.370711	NA
Sbay_7.551	1	0.157295	YGR254W	ENO1	6.35748	0.380235	Enolase I, a phosphopyruvate hydratase; catalyzes the conversion of 2-phosphoglycerate to phosphoenolpyruvate during glycolysis and the reverse reaction during gluconeogenesis; expression is repressed in response to glucose; protein abundance increases in response to DNA replication stress
Sbay_2.637	1	0.158209	YDR461C-A		6.32073	1	Putative protein of unknown function
Sbay_5.197	1	0.159921	YER084W		6.25308	1	Protein of unknown function; expressed at both mRNA and protein levels
Sbay_16.56	1	0.160609	YPL250C	ICY2	6.22628	1	Protein of unknown function; mobilized into polysomes upon a shift from a fermentable to nonfermentable carbon source; potential Cdc28p substrate
Sbay_10.30	1	0.162058	YLL039C	UBI4	6.17065	1	Ubiquitin; becomes conjugated to proteins, marking them for selective degradation via the ubiquitin-26S proteasome system; essential for the cellular stress response; encoded as a polyubiquitin precursor comprised of 5 head-to-tail repeats; protein abundance increases in response to DNA replication stress
Sbay_9.248	0.99799	0.165145	YIR032C	DAL3	6.05529	1	Ureidoglycolate hydrolase, converts ureidoglycolate to glyoxylate and urea in the third step of allantoin degradation; expression sensitive to nitrogen catabolite repression
Sbay_7.583	1	0.165876	YGR286C	BIO2	6.02859	1	Biotin synthase, catalyzes the conversion of dethiobiotin to biotin, which is the last step of the biotin biosynthesis pathway; complements E. coli bioB mutant
Sbay_13.50	1	0.16677	YML098W	TAF13	5.9963	1	TFIID subunit (19 kDa), involved in RNA polymerase II transcription initiation, similar to histone H4 with atypical histone fold motif of Spt3-like transcription factors
Sbay_12.3	1	0.168758	NA	NA	5.92565	1	NA
Sbay_14.204	1	0.171157	YNL134C		5.84259	0.509921	Protein of unknown function; similar to dehydrogenases from other model organisms; green fluorescent protein (GFP)-fusion protein localizes to both the cytoplasm and nucleus; protein abundance increases in response to DNA replication stress
Sbay_7.58	1	0.177049	NA	NA	5.64815	0.50333	NA
Sbay_16.367	1	0.177226	YPR036W-A		5.64251	0.681877	Protein of unknown function; transcription is regulated by Pdr1p
Sbay_15.334	1	0.17866	YHR137W	ARO9	5.59724	1	Aromatic aminotransferase II, catalyzes the first step of tryptophan, phenylalanine, and tyrosine catabolism
Sbay_8.272	1	0.17886	YOR220W	RCN2	5.59097	1	Protein of unknown function; green fluorescent protein (GFP)-fusion protein localizes to the cytoplasm; phosphorylated in response to alpha factor; protein abundance increases in response to DNA replication stress
Sbay_10.17	1	0.179802	NA	NA	5.56167	1	NA
Sbay_10.237	1	0.180261	YLR142W	PUT1	5.54753	1	Proline oxidase, nuclear-encoded mitochondrial protein involved in utilization of proline as sole nitrogen source; PUT1 transcription is induced by Put3p in the presence of proline and the absence of a preferred nitrogen source
Sbay_4.124	1	0.182514	YDL123W	SNA4	5.47903	1	Protein of unknown function, localized to the vacuolar outer membrane; predicted to be palmitoylated
Sbay_8.199	1	0.183552	YOR148C	SPP2	5.44806	1	Essential protein that promotes the first step of splicing and is required for the final stages of spliceosome maturation; interacts with Prp2p, which may release Spp2p from the spliceosome following the first cleavage reaction
Sbay_9.250	1	0.185128	YIR034C	LYS1	5.40166	0.481319	Saccharopine dehydrogenase (NAD+, L-lysine-forming), catalyzes the conversion of saccharopine to L-lysine, which is the final step in the lysine biosynthesis pathway; also has mRNA binding activity
Sbay_3.135	1	0.185518	NA	NA	5.3903	1	NA
Sbay_3.3	1	0.185797	YCL018W	LEU2	5.38221	1	Beta-isopropylmalate dehydrogenase (IMDH), catalyzes the third step in the leucine biosynthesis pathway
Sbay_7.434	1	0.187056	YGR144W	THI4	5.34598	0.00745984	Thiazole synthase, abundant protein involved in the formation of the thiazole moiety of thiamine during thiamine biosynthesis; acts more as a co-substrate rather than an enzyme by providing the sulphur source for thiazole formation; undergoes a single turnover only; required for mitochondrial genome stability in response to DNA damaging agents
Sbay_8.277	1	0.189086	YOR226C	ISU2	5.28859	1	Protein required for synthesis of iron-sulfur proteins; localized to the mitochondrial matrix; performs a scaffolding function in mitochondria during Fe/S cluster assembly; involved in Fe-S cluster assembly for both mitochondrial and cytosolic proteins; isu1 isu2 double mutant is inviable; protein abundance increases in response to DNA replication stress; evolutionarily conserved
Sbay_4.332	1	0.190382	YBR085C-A		5.2526	1	Protein of unknown function; green fluorescent protein (GFP)-fusion protein localizes to the cytoplasm and to the nucleus; protein abundance increases in response to DNA replication stress
Sbay_14.222	1	0.191301	YNL117W	MLS1	5.22736	1	Malate synthase, enzyme of the glyoxylate cycle; involved in utilization of non-fermentable carbon sources; expression is subject to carbon catabolite repression; localizes in peroxisomes during growth on oleic acid, otherwise cytosolic
Sbay_16.199	1	0.191406	YPL111W	CAR1	5.22449	1.96967	Arginase, responsible for arginine degradation, expression responds to both induction by arginine and nitrogen catabolite repression; disruption enhances freeze tolerance
Sbay_2.134	1	0.192969	YBR005W	RCR1	5.18218	1	Protein of the ER membrane involved in cell wall chitin deposition; may function in the endosomal-vacuolar trafficking pathway, helping determine whether plasma membrane proteins are degraded or routed to the plasma membrane; RCR1 has a paralog, RCR2, that arose from the whole genome duplication
Sbay_5.146	0.999999	0.193764	YER045C	ACA1	5.16093	0.223923	ATF/CREB family basic leucine zipper (bZIP) transcription factor; binds as a homodimer to the ATF/CREB consensus sequence TGACGTCA; important for carbon source utilization; target genes include GRE2 and COS8; ACA1 has a paralog, CST6, that arose from the whole genome duplication
Sbay_4.306	1	0.193789	YBR067C	TIP1	5.16026	1	Major cell wall mannoprotein with possible lipase activity; transcription is induced by heat- and cold-shock; member of the Srp1p/Tip1p family of serine-alanine-rich proteins
Sbay_3.129	0.999992	0.194147	NA	NA	5.15074	0.437664	NA
Sbay_8.354	1	0.194294	YOR303W	CPA1	5.14685	1	Small subunit of carbamoyl phosphate synthetase, which catalyzes a step in the synthesis of citrulline, an arginine precursor; translationally regulated by an attenuator peptide encoded by YOR302W within the CPA1 mRNA 5'-leader
Sbay_8.12	1	0.196315	YHL040C	ARN1	5.09385	0.435275	ARN family transporter for siderophore-iron chelates; responsible for uptake of iron bound to ferrirubin, ferrirhodin, and related siderophores; protein increases in abundance and relocalizes to the vacuole upon DNA replication stress
Sbay_5.2	1	0.199322	YEL065W	SIT1	5.01701	0.122283	Ferrioxamine B transporter, member of the ARN family of transporters that specifically recognize siderophore-iron chelates; transcription is induced during iron deprivation and diauxic shift; potentially phosphorylated by Cdc28p
Sbay_15.64	1	0.199344	YOL101C	IZH4	5.01644	1	Membrane protein involved in zinc ion homeostasis; member of the four-protein IZH family; expression induced by fatty acids and altered zinc levels; deletion reduces sensitivity to excess zinc; possible role in sterol metabolism; protein increases in abundance and relocalizes from nucleus to ER upon DNA replication stress
Sbay_7.328	1	0.20019	YGR043C	NQM1	4.99526	0.164411	Transaldolase of unknown function; transcription is repressed by Mot1p and induced by alpha-factor and during diauxic shift
Sbay_9.10	0.999341	0.20141	NA	NA	4.96499	0.313897	NA
Sbay_14.167	1	0.201761	YNL173C	MDG1	4.95636	0.572496	Plasma membrane protein involved in G-protein mediated pheromone signaling pathway; overproduction suppresses bem1 mutations
Sbay_14.139	1	0.202384	YNL202W	SPS19	4.94111	0.143196	Peroxisomal 2,4-dienoyl-CoA reductase, auxiliary enzyme of fatty acid beta-oxidation; homodimeric enzyme required for growth and sporulation on petroselineate medium; expression induced during late sporulation and in the presence of oleate
Sbay_9.77	1	0.204778	YIL117C	PRM5	4.88334	1	Pheromone-regulated protein, predicted to have 1 transmembrane segment; induced during cell integrity signaling
Sbay_11.306	1	0.205095	YKR071C	DRE2	4.8758	1	Component of the cytosolic Fe-S protein assembly (CIA) machinery; contains an Fe-S cluster that receives electrons from NADPH via the action of Tah18pin an early step in the CIA pathway; ortholog of human Ciapin1; protein abundance increases in response to DNA replication stress
Sbay_5.119	1	0.206139	YER024W	YAT2	4.85111	1	Carnitine acetyltransferase; has similarity to Yat1p, which is a carnitine acetyltransferase associated with the mitochondrial outer membrane
Sbay_2.554	0.999623	0.206448	YDR380W	ARO10	4.84384	0.0792973	Phenylpyruvate decarboxylase, catalyzes decarboxylation of phenylpyruvate to phenylacetaldehyde, which is the first specific step in the Ehrlich pathway
Sbay_10.152	1	0.207095	YLR068W	FYV7	4.8287	1	Essential protein required for maturation of 18S rRNA; required for survival upon exposure to K1 killer toxin
Sbay_5.321	1	0.207523	NA	NA	4.81875	1	NA
Sbay_8.280	1	0.209077	YOR229W	WTM2	4.78293	1	Transcriptional modulator involved in regulation of meiosis, silencing, and expression of RNR genes; involved in response to replication stress; contains WD repeats
Sbay_10.580	0.999914	0.209382	NA	NA	4.77596	1	NA
Sbay_6.160	1	0.210113	YJL088W	ARG3	4.75935	0.613846	Ornithine carbamoyltransferase (carbamoylphosphate:L-ornithine carbamoyltransferase), catalyzes the sixth step in the biosynthesis of the arginine precursor ornithine
Sbay_13.316	1	0.21127	YMR136W	GAT2	4.73328	0.74744	Protein containing GATA family zinc finger motifs; similar to Gln3p and Dal80p; expression repressed by leucine
Sbay_5.270	1	0.21158	YER142C	MAG1	4.72634	0.282212	3-methyl-adenine DNA glycosylase; involved in protecting DNA against alkylating agents; initiates base excision repair by removing damaged bases to create abasic sites that are subsequently repaired; protein abundance increases in response to DNA replication stress
Sbay_7.507	1	0.211619	YGR213C	RTA1	4.72547	1	Protein involved in 7-aminocholesterol resistance; has seven potential membrane-spanning regions; expression is induced under both low-heme and low-oxygen conditions; member of the fungal lipid-translocating exporter (LTE) family of protein
Sbay_4.362	1	0.211747	YBR114W	RAD16	4.72262	1	Protein that recognizes and binds damaged DNA in an ATP-dependent manner (with Rad7p) during nucleotide excision repair; subunit of Nucleotide Excision Repair Factor 4 (NEF4) and the Elongin-Cullin-Socs (ECS) ligase complex
Sbay_10.219	1	0.211894	YLR126C		4.71934	1	Putative glutamine amidotransferase; has Aft1p-binding motif in the promoter; may be involved in copper and iron homeostasis; YLR126C is not an essential protein; relocalizes from nucleus to cytoplasmic foci upon DNA replication stress
Sbay_16.151	1	0.212624	YPL159C	PET20	4.70313	1	Mitochondrial protein, required for respiratory growth under some conditions and for stability of the mitochondrial genome
Sbay_10.365	0.999717	0.212927	YLR267W	BOP2	4.69646	1	Protein of unknown function
Sbay_16.163	0.99959	0.212969	YPL147W	PXA1	4.69551	1	Subunit of a heterodimeric peroxisomal ATP-binding cassette transporter complex (Pxa1p-Pxa2p), required for import of long-chain fatty acids into peroxisomes; similarity to human adrenoleukodystrophy transporter ABCD1 and ABCD2 and ALD-related proteins; mutations in ABCD1 cause X-linked adrenoleukodystrophy (X-ALD), a peroxisomal disorder
Sbay_10.332	1	0.213165	YLR237W	THI7	4.69121	0.440967	Plasma membrane transporter responsible for the uptake of thiamine, member of the major facilitator superfamily of transporters; mutation of human ortholog causes thiamine-responsive megaloblastic anemia
Sbay_6.197	1	0.214123	YJL116C	NCA3	4.67022	1	Protein involved in mitochondrion organization; functions with Nca2p to regulate mitochondrial expression of subunits 6 (Atp6p) and 8 (Atp8p) of the Fo-F1 ATP synthase; member of the SUN family; expression induced in cells treated with the mycotoxin patulin; NCA3 has a paralog, UTH1, that arose from the whole genome duplication
Sbay_3.120	1	0.215248	YCR083W	TRX3	4.64581	0.498024	Mitochondrial thioredoxin, highly conserved oxidoreductase required to maintain the redox homeostasis of the cell, forms the mitochondrial thioredoxin system with Trr2p, redox state is maintained by both Trr2p and Glr1p
Sbay_12.92	1	0.215652	YJR008W	MHO1	4.63709	0.377637	Protein of unknown function; inhibits haploid invasive growth when overexpressed; synthetically lethal with phospholipase C (PLC1); expression induced by mild heat-stress on a non-fermentable carbon source, upon entry into stationary phase and upon nitrogen deprivation; repressed by inosine and choline in an Opi1p-dependent manner; highly conserved from bacteria to human; Memo, the human homolog,…
Sbay_5.68	1	0.217648	YEL020C		4.59458	1	Protein of unknown function with low sequence identity to Pdc1p; mRNA identified as translated by ribosome profiling data
Sbay_5.278	0.999848	0.218333	YER150W	SPI1	4.58016	0.559915	GPI-anchored cell wall protein involved in weak acid resistance; basal expression requires Msn2p/Msn4p; expression is induced under conditions of stress and during the diauxic shift; similar to Sed1p
Sbay_16.175	1	0.219921	YPL135W	ISU1	4.54708	1	Conserved protein of the mitochondrial matrix, performs a scaffolding function during assembly of iron-sulfur clusters, interacts physically and functionally with yeast frataxin (Yfh1p); isu1 isu2 double mutant is inviable
Sbay_2.2	1	0.22062	NA	NA	4.53268	1	NA
Sbay_4.223	0.999999	0.222119	YDL025C	RTK1	4.5021	1	Putative protein kinase, potentially phosphorylated by Cdc28p; interacts with ribosome biogenesis factors, Cka2, Gus1 and Arc1; protein abundance increases in response to DNA replication stress
Sbay_13.169	1	0.225133	YMR008C	PLB1	4.44181	0.493932	Phospholipase B (lysophospholipase) involved in lipid metabolism, required for deacylation of phosphatidylcholine and phosphatidylethanolamine but not phosphatidylinositol
Sbay_13.372	1	0.225493	YMR191W	SPG5	4.43473	1	Protein required for proteasome assembly during quiescence; binds to base of the proteasome regulartory particle; required for survival at high temperature during stationary phase; not required for growth on nonfermentable carbon sources
Sbay_7.147	1	0.227815	YGL121C	GPG1	4.38953	0.372358	Proposed gamma subunit of the heterotrimeric G protein that interacts with the receptor Gpr1p; involved in regulation of pseudohyphal growth; requires Gpb1p or Gpb2p to interact with Gpa2p; overproduction causes prion curing
Sbay_3.128	0.999732	0.228873	YCR091W	KIN82	4.36924	1	Putative serine/threonine protein kinase implicated in the regulation of phospholipid asymmetry through the activation of phospholipid translocases (flippases) Lem3p-Dnf1p/Dnf2p; similar to Fpk1p
Sbay_15.414	1	0.230171	YHR208W	BAT1	4.34459	1.33125	Mitochondrial branched-chain amino acid (BCAA) aminotransferase, preferentially involved in BCAA biosynthesis; homolog of murine ECA39; highly expressed during logarithmic phase and repressed during stationary phase
Sbay_14.229	1	0.230314	YNL110C	NOP15	4.34189	1	Constituent of 66S pre-ribosomal particles, involved in 60S ribosomal subunit biogenesis; localizes to both nucleolus and cytoplasm
Sbay_10.198	0.999981	0.230951	YLR108C		4.32993	1	Protein of unknown function; green fluorescent protein (GFP)-fusion protein localizes to the nucleus; YLR108C is not an esssential gene; protein abundance increases in response to DNA replication stress; YLR108C has a paralog, YDR132C, that arose from the whole genome duplication
Sbay_4.504	1	0.231301	YBR244W	GPX2	4.32337	1	Phospholipid hydroperoxide glutathione peroxidase; protects cells from phospholipid hydroperoxides and nonphospholipid peroxides during oxidative stress; induced by glucose starvation; protein abundance increases in response to DNA replication stress
Sbay_10.459	1	0.231629	YLR359W	ADE13	4.31725	1	Adenylosuccinate lyase, catalyzes two steps in the 'de novo' purine nucleotide biosynthetic pathway; expression is repressed by adenine and activated by Bas1p and Pho2p; mutations in human ortholog ADSL cause adenylosuccinase deficiency
Sbay_11.104	1	0.232236	YKL120W	OAC1	4.30596	1	Mitochondrial inner membrane transporter, transports oxaloacetate, sulfate, thiosulfate, and isopropylmalate; member of the mitochondrial carrier family
Sbay_7.249	1	0.234635	YGL029W	CGR1	4.26195	1	Protein involved in nucleolar integrity and processing of pre-rRNA; has a role in processing rRNA for the 60S ribosome subunit; transcript is induced in response to cytotoxic stress but not genotoxic stress; relocalizes from nucleus to nucleolus upon DNA replication stress
Sbay_2.218	1	0.235925	YDR059C	UBC5	4.23864	0.502944	Ubiquitin-conjugating enzyme; mediates selective degradation of short-lived, abnormal, or excess proteins, including histone H3; central component of the cellular stress response; expression is heat inducible; protein abundance increases in response to DNA replication stress; UBC5 has a paralog, UBC4, that arose from the whole genome duplication
Sbay_5.290	1	0.237255	NA	NA	4.21487	1	NA
Sbay_12.183	0.981939	0.238245	YJR095W	SFC1	4.19737	1	Mitochondrial succinate-fumarate transporter, transports succinate into and fumarate out of the mitochondrion; required for ethanol and acetate utilization
Sbay_3.183	1	0.238326	NA	NA	4.19593	1	NA
Sbay_16.482	1	0.241299	YPR154W	PIN3	4.14424	1	Protein that induces appearance of [PIN+] prion when overproduced
Sbay_15.178	1	0.243638	YOR003W	YSP3	4.10444	1	Putative precursor to the subtilisin-like protease III
Sbay_4.350	1	0.244725	YBR104W	YMC2	4.08623	1	Putative mitochondrial inner membrane transporter; proposed role in oleate metabolism and glutamate biosynthesis; member of the mitochondrial carrier (MCF) family; YMC2 has a paralog, YMC1, that arose from the whole genome duplication
Sbay_7.181	0.999978	0.246919	YGL088W		4.04991	1	Dubious open reading frame unlikely to encode a protein, based on available experimental and comparative sequence data; partially overlaps snR10, a snoRNA required for preRNA processing
Sbay_14.122	1	0.246956	YNL220W	ADE12	4.04931	1	Adenylosuccinate synthase, catalyzes the first step in synthesis of adenosine monophosphate from inosine 5'monophosphate during purine nucleotide biosynthesis; exhibits binding to single-stranded autonomously replicating (ARS) core sequence
Sbay_2.76	1	0.249998	NA	NA	4.00003	1.60239	NA
Sbay_10.8	1	0.252593	NA	NA	3.95894	0.529039	NA
Sbay_8.99	1	0.253607	YOR047C	STD1	3.94311	1	Protein involved in control of glucose-regulated gene expression; interacts with kinase Snf1p, glucose sensors Snf3p and Rgt2p, TATA-binding Spt15p; regulator of transcription factor Rgt1p; interactions with Pma1p appear to propagate [GAR+]
Sbay_2.208	1	0.254067	YDR050C	TPI1	3.93598	0.767748	Triose phosphate isomerase, abundant glycolytic enzyme; mRNA half-life is regulated by iron availability; transcription is controlled by activators Reb1p, Gcr1p, and Rap1p through binding sites in the 5' non-coding region; inhibition of Tpi1p activity by PEP (phosphoenolpyruvate) stimulates redox metabolism in respiring cells; E104D mutation in human TPI causes a rare autosomal disease
Sbay_16.525	1	0.254935	YPR193C	HPA2	3.92257	1	Tetrameric histone acetyltransferase with similarity to Gcn5p, Hat1p, Elp3p, and Hpa3p; acetylates histones H3 and H4 in vitro and exhibits autoacetylation activity
Sbay_16.329	1	0.255928	NA	NA	3.90735	1	NA
Sbay_9.245	1	0.259449	YIR029W	DAL2	3.85432	1	Allantoicase, converts allantoate to urea and ureidoglycolate in the second step of allantoin degradation; expression sensitive to nitrogen catabolite repression and induced by allophanate, an intermediate in allantoin degradation
Sbay_2.23	1	0.259668	YBL093C	ROX3	3.85107	1	Subunit of the RNA polymerase II mediator complex; associates with core polymerase subunits to form the RNA polymerase II holoenzyme
Sbay_12.200	1	0.259703	YJR109C	CPA2	3.85056	1	Large subunit of carbamoyl phosphate synthetase, which catalyzes a step in the synthesis of citrulline, an arginine precursor
Sbay_9.24	1	0.26037	YIL161W		3.84068	1	Putative protein of unknown function; green fluorescent protein (GFP)-fusion protein localizes to the cytoplasm; mRNA is enriched in Scp160p-associated mRNPs; YIL161W is a non-essential gene
Sbay_6.123	1	0.261548	YJL048C	UBX6	3.82339	1	UBX (ubiquitin regulatory X) domain-containing protein; interacts with Cdc48p, transcription is repressed when cells are grown in media containing inositol and choline; UBX6 has a paralog, UBX7, that arose from the whole genome duplication
Sbay_7.12	0.999861	0.261802	YGL249W	ZIP2	3.81969	1	Meiosis-specific protein; involved in normal synaptonemal complex formation and pairing between homologous chromosomes during meiosis; relocalizes from mitochondrion to cytoplasm upon DNA replication stress
Sbay_9.143	1	0.26481	YIL056W	VHR1	3.7763	1	Transcriptional activator; required for the vitamin H-responsive element (VHRE) mediated induction of VHT1 (Vitamin H transporter) and BIO5 (biotin biosynthesis intermediate transporter) in response to low biotin concentrations; VHR1 has a paralog, VHR2, that arose from the whole genome duplication
Sbay_15.201	1	0.267858	YHR018C	ARG4	3.73332	1	Argininosuccinate lyase, catalyzes the final step in the arginine biosynthesis pathway
Sbay_7.172	1	0.267915	YGL096W	TOS8	3.73253	0.43517	Homeodomain-containing protein and putative transcription factor; found associated with chromatin; target of SBF transcription factor; induced during meiosis and under cell-damaging conditions; TOS8 has a paralog, CUP9, that arose from the whole genome duplication
Sbay_13.36	1	0.268669	YML108W		3.72205	1	Protein of unknown function; structure defines a new subfamily of the split beta-alpha-beta sandwiches; green fluorescent protein (GFP)-fusion protein localizes to the cytoplasm and nucleus; YML108W is not an essential gene; relative distribution to the nucleus increases upon DNA replication stress
Sbay_10.242	1	0.269078	YLR145W	RMP1	3.71639	1	Subunit of RNase MRP, which processes pre-rRNA and has a role in cell cycle-regulated degradation of daughter cell-specific mRNAs; unlike most subunits, not shared between RNase MRP and nuclear RNase P
Sbay_4.554	0.999998	0.269215	YBR294W	SUL1	3.71451	1	High affinity sulfate permease of the SulP anion transporter family; sulfate uptake is mediated by specific sulfate transporters Sul1p and Sul2p, which control the concentration of endogenous activated sulfate intermediates
Sbay_13.453	1	0.269367	YMR269W	TMA23	3.7124	1	Nucleolar protein implicated in ribosome biogenesis; deletion extends chronological lifespan
Sbay_8.93	1	0.270136	YOR040W	GLO4	3.70184	1	Mitochondrial glyoxalase II, catalyzes the hydrolysis of S-D-lactoylglutathione into glutathione and D-lactate
Sbay_2.69	1	0.270733	YBL049W	MOH1	3.69368	0.487578	Protein of unknown function, has homology to kinase Snf7p; not required for growth on nonfermentable carbon sources; essential for survival in stationary phase
Sbay_9.105	1	0.27145	YIL094C	LYS12	3.68392	0.556418	Homo-isocitrate dehydrogenase, an NAD-linked mitochondrial enzyme required for the fourth step in the biosynthesis of lysine, in which homo-isocitrate is oxidatively decarboxylated to alpha-ketoadipate
Sbay_7.38	1	0.272995	YGL224C	SDT1	3.66307	1	Pyrimidine nucleotidase; overexpression suppresses the 6-AU sensitivity of transcription elongation factor S-II, as well as resistance to other pyrimidine derivatives
Sbay_5.161	1	0.274311	YER055C	HIS1	3.6455	2.12797	ATP phosphoribosyltransferase, a hexameric enzyme, catalyzes the first step in histidine biosynthesis; mutations cause histidine auxotrophy and sensitivity to Cu, Co, and Ni salts; transcription is regulated by general amino acid control
Sbay_2.422	1	0.274525	YDR256C	CTA1	3.64265	1	Catalase A, breaks down hydrogen peroxide in the peroxisomal matrix formed by acyl-CoA oxidase (Pox1p) during fatty acid beta-oxidation
Sbay_5.4	1	0.274962	YEL063C	CAN1	3.63686	1	Plasma membrane arginine permease; requires phosphatidyl ethanolamine (PE) for localization, exclusively associated with lipid rafts; mutation confers canavanine resistance; CAN1 has a paralog, ALP1, that arose from the whole genome duplication
Sbay_15.260	1	0.27622	YHR071W	PCL5	3.62031	1.85104	Cyclin, interacts with and phosphorylated by Pho85p cyclin-dependent kinase (Cdk), induced by Gcn4p at level of transcription, specifically required for Gcn4p degradation, may be sensor of cellular protein biosynthetic capacity
Sbay_13.12	0.997464	0.278211	NA	NA	3.5944	1	NA
Sbay_9.145	1	0.279889	YIL053W	RHR2	3.57285	1	Constitutively expressed glycerol-1-phosphatase; involved in glycerol biosynthesis, induced in response to both anaerobic and osmotic stress; RHR2 has a paralog, HOR2, that arose from the whole genome duplication
Sbay_13.485	1	0.280348	YMR295C		3.56699	1	Protein of unknown function that associates with ribosomes; green fluorescent protein (GFP)-fusion protein localizes to the cell periphery and bud; YMR295C is not an essential gene; protein abundance increases in response to DNA replication stress
Sbay_7.503	1	0.280349	YGR209C	TRX2	3.56699	1	Cytoplasmic thioredoxin isoenzyme; part of the thioredoxin system which protects cells against oxidative and reductive stress; forms LMA1 complex with Pbi2p; acts as a cofactor for Tsa1p; required for ER-Golgi transport and vacuole inheritance; protein abundance increases in response to DNA replication stress
Sbay_4.311	0.9981	0.280836	YBR072W	HSP26	3.5608	0.609433	Small heat shock protein (sHSP) with chaperone activity; forms hollow, sphere-shaped oligomers that suppress unfolded proteins aggregation; oligomer activation requires heat-induced conformational change; also has mRNA binding activity
Sbay_15.379	1	0.281887	YHR179W	OYE2	3.54752	0.511214	Conserved NADPH oxidoreductase containing flavin mononucleotide (FMN); responsible for geraniol reduction into citronellol during fermentation; homologous to Oye3p with different ligand binding and catalytic properties; may be involved in sterol metabolism, oxidative stress response, and programmed cell death; protein abundance increases in response to DNA replication stress
Sbay_2.737	0.999731	0.282202	NA	NA	3.54356	0.264308	NA
Sbay_9.17	1	0.282361	NA	NA	3.54157	1	NA
Sbay_13.273	1	0.28263	YMR096W	SNZ1	3.53819	1	Protein involved in vitamin B6 biosynthesis; member of a stationary phase-induced gene family; coregulated with SNO1; interacts with Sno1p and with Yhr198p, perhaps as a multiprotein complex containing other Snz and Sno proteins
Sbay_13.494	1	0.282972	YMR303C	ADH2	3.53391	1	Glucose-repressible alcohol dehydrogenase II, catalyzes the conversion of ethanol to acetaldehyde; involved in the production of certain carboxylate esters; regulated by ADR1
Sbay_8.331	1	0.283958	YOR283W		3.52165	1	Phosphatase with a broad substrate specificity and some similarity to GPM1/YKL152C, a phosphoglycerate mutase; YOR283W is not an essential gene
Sbay_10.9	1	0.285235	NA	NA	3.50588	0.205209	NA
Sbay_6.210	1	0.286298	YJL130C	URA2	3.49286	1	Bifunctional carbamoylphosphate synthetase (CPSase)-aspartate transcarbamylase (ATCase), catalyzes the first two enzymatic steps in the de novo biosynthesis of pyrimidines; both activities are subject to feedback inhibition by UTP
Sbay_3.154	1	0.286582	YCL058W-A	ADF1	3.4894	1	Transcriptional repressor encoded by the antisense strand of the FYV5 gene; negatively regulates transcription of FYV5 by binding to the promoter on the sense strand
Sbay_7.395	0.999963	0.2869	YGR110W	CLD1	3.48554	1	Mitochondrial cardiolipin-specific phospholipase; functions upstream of Taz1p to generate monolyso-cardiolipin; transcription increases upon genotoxic stress; involved in restricting Ty1 transposition; has homology to mammalian CGI-58
Sbay_2.415	1	0.287952	YDR249C		3.4728	1	Putative protein of unknown function
Sbay_16.294	1	0.288987	YPL024W	RMI1	3.46037	1	Subunit of the RecQ (Sgs1p) - Topo III (Top3p) complex; stimulates superhelical relaxing and ssDNA binding activities of Top3p; involved in response to DNA damage; functions in S phase-mediated cohesion establishment via a pathway involving the Ctf18-RFC complex and Mrc1p; null mutants display increased rates of recombination and delayed S phase
Sbay_1.83	1	0.290494	YAR015W	ADE1	3.44241	1	N-succinyl-5-aminoimidazole-4-carboxamide ribotide (SAICAR) synthetase, required for 'de novo' purine nucleotide biosynthesis; red pigment accumulates in mutant cells deprived of adenine; protein abundance increases in response to DNA replication stress
Sbay_13.267	1	0.290564	YMR090W		3.44158	1	Putative protein of unknown function with similarity to DTDP-glucose 4,6-dehydratases; GFP-fusion protein localizes to the cytoplasm; up-regulated in response to the fungicide mancozeb; not essential for viability
Sbay_4.405	1	0.291466	YBR155W	CNS1	3.43094	1	TPR-containing co-chaperone; binds both Hsp82p (Hsp90) and Ssa1p (Hsp70) and stimulates the ATPase activity of SSA1, ts mutants reduce Hsp82p function while over expression suppresses the phenotypes of an HSP82 ts allele and a cpr7 deletion
Sbay_3.174	1	0.293526	YCL038C	ATG22	3.40686	0.422727	Vacuolar integral membrane protein required for efflux of amino acids during autophagic body breakdown in the vacuole; null mutation causes a gradual loss of viability during starvation
Sbay_6.280	1	0.293828	YJL200C	ACO2	3.40335	0.769732	Putative mitochondrial aconitase isozyme; similarity to Aco1p, an aconitase required for the TCA cycle; expression induced during growth on glucose, by amino acid starvation via Gcn4p, and repressed on ethanol
Sbay_16.471	1	0.293831	YPR143W	RRP15	3.40332	1	Nucleolar protein, constituent of pre-60S ribosomal particles; required for proper processing of the 27S pre-rRNA at the A3 and B1 sites to yield mature 5.8S and 25S rRNAs
Sbay_4.433	1	0.294616	YBR182C	SMP1	3.39425	1	Putative transcription factor of the MADS-box family; involved in regulating the response to osmotic stress; SMP1 has a paralog, RLM1, that arose from the whole genome duplication
Sbay_15.284	1	0.296312	YHR090C	YNG2	3.37483	1	Subunit of NuA4, an essential histone acetyltransferase complex; positions Piccolo NuA4 for efficient acetylation of histone H4 or histone H2A; has similarity to the human tumor suppressor ING1 and its isoforms ING4 and ING5
Sbay_16.132	1	0.297357	YPL177C	CUP9	3.36296	1.94456	Homeodomain-containing transcriptional repressor; regulates expression of PTR2, which encodes a major peptide transporter; imported peptides activate ubiquitin-dependent proteolysis, resulting in degradation of Cup9p and de-repression of PTR2 transcription; CUP9 has a paralog, TOS8, that arose from the whole genome duplication; protein abundance increases in response to DNA replication stress
Sbay_12.150	0.999847	0.297551	YJR061W		3.36077	0.462267	Putative protein of unknown function; non-essential gene; transcription repressed by Rm101p; YJR061W has a paralog, MNN4, that arose from the whole genome duplication
Sbay_8.438	1	0.297813	NA	NA	3.35781	0.198915	NA
Sbay_8.360	1	0.297927	YOR308C	SNU66	3.35653	1	Component of the U4/U6.U5 snRNP complex involved in pre-mRNA splicing via spliceosome; also required for pre-5S rRNA processing and may act in concert with Rnh70p; has homology to human SART-1
Sbay_15.292	1	0.298052	YHR097C		3.35512	1	Putative protein of unknown function; green fluorescent protein (GFP)-fusion protein localizes to the cytoplasm and the nucleus
Sbay_16.365	1	0.30038	YPR035W	GLN1	3.32911	0.728449	Glutamine synthetase (GS); synthesizes glutamine from glutamate and ammonia; with Glt1p, forms the secondary pathway for glutamate biosynthesis from ammonia; expression regulated by nitrogen source and by amino acid limitation; relocalizes from nucleus to cytoplasmic foci upon DNA replication stress
Sbay_8.96	0.999949	0.300433	YOR044W	IRC23	3.32853	1	Putative protein of unknown function; green fluorescent protein (GFP)-fusion localizes to the ER; null mutant displays increased levels of spontaneous Rad52p foci; IRC23 has a paralog, BSC2, that arose from the whole genome duplication
Sbay_1.8	1	0.300454	YAL059W	ECM1	3.3283	1	Pre-ribosomal factor involved in 60S ribosomal protein subunit export; associates with the pre-60S particle; shuttles between the nucleus and cytoplasm
Sbay_5.251	1	0.303196	YER130C		3.2982	1	Protein of unknown function; transcription is regulated by Haa1p, Sok2p and Zap1p transcriptional activators; computational analysis suggests a role as a transcription factor; C. albicans homolog (MNL1) plays a role in adaptation to stress
Sbay_2.47	1	0.303648	YBL071W-A	KTI11	3.29329	1	Zn-ribbon protein that co-purifies with Dph1 and Dph2 in a complex required for synthesis of diphthamide on translation factor eEF2 and with Elongator subunits Iki3p, Elp2p, and Elp3p involved in modification of wobble nucleosides in tRNAs
Sbay_5.53	1	0.305258	YEL012W	UBC8	3.27592	1	Ubiquitin-conjugating enzyme that negatively regulates gluconeogenesis by mediating the glucose-induced ubiquitination of fructose-1,6-bisphosphatase (FBPase); cytoplasmic enzyme that catalyzes the ubiquitination of histones in vitro
Sbay_13.208	1	0.306147	YMR039C	SUB1	3.26641	1	Transcriptional coactivator; facilitates elongation through factors that modify RNAP II; role in peroxide resistance involving Rad2p; role in the hyperosmotic stress response through polymerase recruitment at RNAP II and RNAP III genes; protein abundance increases in response to DNA replication stress
Sbay_6.252	1	0.307305	YJL172W	CPS1	3.2541	1	Vacuolar carboxypeptidase yscS; expression is induced under low-nitrogen conditions
Sbay_10.341	1	0.308442	YLR245C	CDD1	3.2421	1	Cytidine deaminase; catalyzes the modification of cytidine to uridine in vitro but native RNA substrates have not been identified, localizes to both the nucleus and cytoplasm
Sbay_15.107	1	0.308614	YOL058W	ARG1	3.2403	0.370117	Arginosuccinate synthetase, catalyzes the formation of L-argininosuccinate from citrulline and L-aspartate in the arginine biosynthesis pathway; potential Cdc28p substrate
Sbay_13.514	1	0.30971	YMR319C	FET4	3.22883	0.0620845	Low-affinity Fe(II) transporter of the plasma membrane
Sbay_16.223	1	0.310263	YPL089C	RLM1	3.22307	1	MADS-box transcription factor; component of the protein kinase C-mediated MAP kinase pathway involved in the maintenance of cell integrity; phosphorylated and activated by the MAP-kinase Slt2p; RLM1 has a paralog, SMP1, that arose from the whole genome duplication
Sbay_13.209	0.999996	0.311186	YMR040W	YET2	3.21352	0.439723	Protein of unknown function that may interact with ribosomes, based on co-purification experiments; homolog of human BAP31 protein
Sbay_15.234	1	0.311247	YHR046C	INM1	3.21289	1	Inositol monophosphatase, involved in biosynthesis of inositol and in phosphoinositide second messenger signaling; INM1 expression increases in the presence of inositol and decreases upon exposure to antibipolar drugs lithium and valproate
Sbay_7.544	1	0.313506	YGR249W	MGA1	3.18973	1	Protein similar to heat shock transcription factor; multicopy suppressor of pseudohyphal growth defects of ammonium permease mutants
Sbay_4.32	1	0.316702	YDL215C	GDH2	3.15754	0.569103	NAD(+)-dependent glutamate dehydrogenase, degrades glutamate to ammonia and alpha-ketoglutarate; expression sensitive to nitrogen catabolite repression and intracellular ammonia levels
Sbay_8.256	1	0.316834	NA	NA	3.15623	1.80476	NA
Sbay_10.463	1	0.316855	YLR361C-A		3.15602	1	Putative protein of unknown function
Sbay_8.437	1	0.317397	YOR381W	FRE3	3.15063	0.251595	Ferric reductase, reduces siderophore-bound iron prior to uptake by transporters; expression induced by low iron levels
Sbay_10.102	1	0.318132	YLR022C	SDO1	3.14335	1	Essential protein involved in ribosome maturation; with Ria1p, promotes release of Tif6p from 60S ribosomal subunits in the cytoplasm so that they can assemble with 40S subunits to generate mature ribosomes; ortholog of the human protein (SBDS) responsible for autosomal recessive Shwachman-Bodian-Diamond Syndrome; highly conserved across archaea and eukaryotes
Sbay_10.352	1	0.318325	NA	NA	3.14144	0.701056	NA
Sbay_16.139	0.999901	0.318587	YPL171C	OYE3	3.13886	1	Conserved NADPH oxidoreductase containing flavin mononucleotide (FMN), homologous to Oye2p with different ligand binding and catalytic properties; has potential roles in oxidative stress response and programmed cell death
Sbay_13.379	1	0.319474	YMR197C	VTI1	3.13015	1	Protein involved in cis-Golgi membrane traffic; v-SNARE that interacts with two t-SNARES, Sed5p and Pep12p; required for multiple vacuolar sorting pathways
Sbay_11.83	1	0.319632	YKL142W	MRP8	3.1286	1	Protein of unknown function; undergoes sumoylation; transcription induced under cell wall stress; protein levels are reduced under anaerobic conditions; protein abundance increases in response to DNA replication stress; originally thought to be a mitochondrial ribosomal protein based on sequence analysis
Sbay_5.293	1	0.32078	YER159C	BUR6	3.1174	1	Subunit of a heterodimeric NC2 transcription regulator complex with Ncb2p; complex binds to TBP and can repress transcription by preventing preinitiation complex assembly or stimulate activated transcription; homologous to human NC2alpha
Sbay_7.179	1	0.320904	YGL090W	LIF1	3.1162	1	Component of the DNA ligase IV complex that mediates nonhomologous end joining in DNA double-strand break repair; physically interacts with Dnl4p and Nej1p; homologous to mammalian XRCC4 protein
Sbay_2.717	1	0.324084	NA	NA	3.08562	0.6028	NA
Sbay_13.362	1	0.325829	YMR181C		3.06909	1	Protein of unknown function; mRNA transcribed as part of a bicistronic transcript with a predicted transcriptional repressor RGM1/YMR182C; mRNA is destroyed by nonsense-mediated decay (NMD); not an essential gene; YMR181C has a paralog, YPL229W, that arose from the whole genome duplication
Sbay_15.106	1	0.325891	YOL059W	GPD2	3.06851	1	NAD-dependent glycerol 3-phosphate dehydrogenase, homolog of Gpd1p, expression is controlled by an oxygen-independent signaling pathway required to regulate metabolism under anoxic conditions; located in cytosol and mitochondria; constitutively active but is inactivated via phosphorylation by energy-stress responsive kinase SNF1
Sbay_6.183	1	0.326471	YJL108C	PRM10	3.06306	1	Pheromone-regulated protein, proposed to be involved in mating; predicted to have 5 transmembrane segments; induced by treatment with 8-methoxypsoralen and UVA irradiation
Sbay_9.205	1	0.327888	YIL002W-A		3.04983	1	Putative protein of unknown function; identified by expression profiling and mass spectrometry
Sbay_1.12	1	0.329647	YAL054C	ACS1	3.03355	1	Acetyl-coA synthetase isoform which, along with Acs2p, is the nuclear source of acetyl-coA for histone acetylation; expressed during growth on nonfermentable carbon sources and under aerobic conditions
Sbay_2.243	1	0.329977	YDR083W	RRP8	3.03051	1	Nucleolar S-adenosylmethionine-dependent rRNA methyltransferase; methylates adenine (m1A) of the large subunit (LSU) rRNA at position 645; involved in pre-rRNA cleavage at site A2; mutation is synthetically lethal with a gar1 mutation; deletion disrupts telomere maintenance by influencing the expression of neighboring gene STN1
Sbay_2.327	1	0.330124	YDR163W	CWC15	3.02916	1	Non-essential protein involved in pre-mRNA splicing, component of a complex containing Cef1p; has similarity to S. pombe Cwf15p
Sbay_16.40	1	0.330277	YPL265W	DIP5	3.02776	1	Dicarboxylic amino acid permease; mediates high-affinity and high-capacity transport of L-glutamate and L-aspartate; also a transporter for Gln, Asn, Ser, Ala, and Gly; relocalizes from plasma membrane to vacuole upon DNA replication stress
Sbay_13.310	1	0.330526	NA	NA	3.02548	1	NA
Sbay_3.42	1	0.332945	YCR016W		3.0035	1	Putative protein of unknown function; green fluorescent protein (GFP)-fusion protein localizes to the nucleolus and nucleus; predicted to be involved in ribosome biogenesis
Sbay_8.89	1	0.333034	YOR036W	PEP12	3.00269	1	Target membrane receptor (t-SNARE) for vesicular intermediates traveling between the Golgi apparatus and the vacuole; controls entry of biosynthetic, endocytic, and retrograde traffic into the prevacuolar compartment; syntaxin
Sbay_7.45	1	0.333572	YGL215W	CLG1	2.99786	1	Cyclin-like protein that interacts with Pho85p; has sequence similarity to G1 cyclins PCL1 and PCL2
Sbay_13.49	1	0.333956	YML099C	ARG81	2.99441	1	Zinc-finger transcription factor of the Zn(2)-Cys(6) binuclear cluster domain type, involved in the regulation of arginine-responsive genes; acts with Arg80p and Arg82p
Sbay_13.434	0.999685	0.334407	YMR250W	GAD1	2.99036	0.416211	Glutamate decarboxylase, converts glutamate into gamma-aminobutyric acid (GABA) during glutamate catabolism; involved in response to oxidative stress
Sbay_14.250	1	0.334595	YNL090W	RHO2	2.98868	1	Non-essential small GTPase of the Rho/Rac subfamily of Ras-like proteins, involved in the establishment of cell polarity and in microtubule assembly
Sbay_6.37	1	0.335654	YFL021W	GAT1	2.97926	1	Transcriptional activator of genes involved in nitrogen catabolite repression; contains a GATA-1-type zinc finger DNA-binding motif; activity and localization regulated by nitrogen limitation and Ure2p
Sbay_16.224	1	0.33634	YPL088W		2.97318	1	Putative aryl alcohol dehydrogenase; transcription is activated by paralogous transcription factors Yrm1p and Yrr1p along with genes involved in multidrug resistance
Sbay_16.388	1	0.338426	YPR061C	JID1	2.95485	1	Probable Hsp40p co-chaperone, has a DnaJ-like domain and appears to be involved in ER-associated degradation of misfolded proteins containing a tightly folded cytoplasmic domain; inhibits replication of Brome mosaic virus in S. cerevisiae
Sbay_9.174	1	0.33858	YIL024C		2.95351	1	Putative protein of unknown function; non-essential gene; expression directly regulated by the metabolic and meiotic transcriptional regulator Ume6p
Sbay_14.223	1	0.338857	YNL116W	DMA2	2.9511	1	Ubiquitin-protein ligase (E3); controls septin dynamics and the spindle position checkpoint (SPOC) along with functionally redundant ligase Dma1p by regulating the recruitment of Elm1p to the bud neck; regulates levels of the translation initiation factor eIF2 subunit Gcd11p, as well as abundance, localization, and ubiquitination of Cdk inhibitory kinase Swe1p; ortholog of human RNF8 protein, wit…
Sbay_7.82	0.999999	0.339651	YGL180W	ATG1	2.9442	1	Protein ser/thr kinase required for vesicle formation in autophagy and the cytoplasm-to-vacuole targeting (Cvt) pathway; structurally required for phagophore assembly site formation; during autophagy forms a complex with Atg13p and Atg17p
Sbay_2.22	1	0.339727	YBL095W		2.94354	0.607587	Putative protein of unknown function; the authentic, non-tagged protein is detected in highly purified mitochondria in high-throughput studies
Sbay_7.540	1	0.341034	YGR245C	SDA1	2.93226	2.73479	Highly conserved nuclear protein required for actin cytoskeleton organization and passage through Start, plays a critical role in G1 events, binds Nap1p, also involved in 60S ribosome biogenesis
Sbay_14.88	1	0.341214	YNL254C	RTC4	2.93071	0.602034	Protein of unknown function; null mutation suppresses cdc13-1 temperature sensitivity; (GFP)-fusion protein localizes to both the cytoplasm and the nucleus
Sbay_5.181	1	0.341947	YER069W	ARG5,6	2.92443	0.465606	Acetylglutamate kinase and N-acetyl-gamma-glutamyl-phosphate reductase; N-acetyl-L-glutamate kinase (NAGK) catalyzes the 2nd and N-acetyl-gamma-glutamyl-phosphate reductase (NAGSA), the 3rd step in arginine biosynthesis; synthesized as a precursor which is processed in the mitochondrion to yield mature NAGK and NAGSA; enzymes form a metabolon complex with Arg2p; NAGK C-terminal domain stabilizes …
Sbay_11.327	1	0.343406	YKR091W	SRL3	2.912	1	Cytoplasmic protein that, when overexpressed, suppresses the lethality of a rad53 null mutation; potential Cdc28p substrate
Sbay_8.197	1	0.344384	YOR145C	PNO1	2.90374	2.33015	Essential nucleolar protein required for pre-18S rRNA processing, interacts with Dim1p, an 18S rRNA dimethyltransferase, and also with Nob1p, which is involved in proteasome biogenesis; contains a KH domain
Sbay_9.53	1	0.344812	YIL136W	OM45	2.90014	0.602052	Mitochondrial outer membrane protein of unknown function; major constituent of the outer membrane, located on the outer (cytosolic) face; protein abundance increases in response to DNA replication stress
Sbay_10.351	0.999997	0.346356	NA	NA	2.8872	1	NA
Sbay_14.240	1	0.346822	YNL099C	OCA1	2.88333	1	Putative protein tyrosine phosphatase, required for cell cycle arrest in response to oxidative damage of DNA
Sbay_14.264	1	0.34684	YNL075W	IMP4	2.88317	1	Component of the SSU processome, which is required for pre-18S rRNA processing; interacts with Mpp10p; member of a superfamily of proteins that contain a sigma(70)-like motif and associate with RNAs
Sbay_9.123	0.997061	0.34785	NA	NA	2.8748	1	NA
Sbay_7.557	1	0.348066	YGR260W	TNA1	2.87302	0.0784217	High affinity nicotinic acid plasma membrane permease, responsible for uptake of low levels of nicotinic acid; expression of the gene increases in the absence of extracellular nicotinic acid or para-aminobenzoate (PABA)
Sbay_14.332	1	0.348617	YNL015W	PBI2	2.86847	0.673719	Cytosolic inhibitor of vacuolar proteinase B (PRB1); required for efficient vacuole inheritance; with thioredoxin forms protein complex LMA1, which assists in priming SNARE molecules and promotes vacuole fusion; protein abundance increases in response to DNA replication stress
Sbay_10.523	1	0.34876	YLR407W		2.86731	1	Putative protein of unknown function; null mutant displays elongated buds and a large fraction of budded cells have only one nucleus
Sbay_2.248	1	0.348912	YDR088C	SLU7	2.86605	1	RNA splicing factor, required for ATP-independent portion of 2nd catalytic step of spliceosomal RNA splicing; interacts with Prp18p; contains zinc knuckle domain
Sbay_14.205	0.997048	0.349266	YNL133C	FYV6	2.86315	1	Protein of unknown function, required for survival upon exposure to K1 killer toxin; proposed to regulate double-strand break repair via non-homologous end-joining
Sbay_5.183	0.982025	0.349658	YER071C	TDA2	2.85994	1	Protein of unknown function; green fluorescent protein (GFP)-fusion protein localizes to the cytoplasm in a punctate pattern; null mutant is sensitive to expression of the top1-T722A allele
Sbay_15.290	0.999993	0.349701	NA	NA	2.85959	1	NA
Sbay_6.201	1	0.350131	YJL122W	ALB1	2.85607	2.399	Shuttling pre-60S factor; involved in the biogenesis of ribosomal large subunit; interacts directly with Arx1p; responsible for Tif6p recycling defects in absence of Rei1p
Sbay_7.568	1	0.350541	NA	NA	2.85273	1	NA
Sbay_13.250	1	0.350579	YMR073C	IRC21	2.85242	1	Putative protein of unknown function; may be involved in resistance to carboplatin and cisplatin; null mutant displays increase in spontaneous Rad52p foci; contains a lipid-binding domain and binds cardiolipin in a large-scale study
Sbay_16.393	1	0.350696	YPR065W	ROX1	2.85147	1	Heme-dependent repressor of hypoxic genes; mediates aerobic transcriptional repression of hypoxia induced genes such as COX5b and CYC7; repressor function regulated through decreased promoter occupancy in response to oxidative stress; contains an HMG domain that is responsible for DNA bending activity; involved in the hyperosmotic stress resistance
Sbay_11.155	1	0.350705	Anc_2.611	NA	2.8514	0.547735	NA
Sbay_14.346	1	0.35076	YNL002C	RLP7	2.85095	1	Nucleolar protein with similarity to large ribosomal subunit L7 proteins; constituent of 66S pre-ribosomal particles; plays an essential role in processing of precursors to the large ribosomal subunit RNAs
Sbay_10.317	1	0.351621	YLR223C	IFH1	2.84397	1	Coactivator that regulates transcription of ribosomal protein (RP) genes; recruited to RP gene promoters during optimal growth conditions via Fhl1p; subunit of CURI, a complex that coordinates RP production and pre-rRNA processing
Sbay_11.113	1	0.351886	YKL110C	KTI12	2.84183	1	Protein that plays a role, with Elongator complex, in modification of wobble nucleosides in tRNA; involved in sensitivity to G1 arrest induced by zymocin; interacts with chromatin throughout the genome; also interacts with Cdc19p
Sbay_5.292	1	0.353024	YER158C		2.83267	1	Protein of unknown function; potentially phosphorylated by Cdc28p; YER158C has a paralog, AFR1, that arose from the whole genome duplication
Sbay_4.472	1	0.353225	YBR214W	SDS24	2.83106	1	Protein involved in cell separation during budding; one of two S. cerevisiae homologs (Sds23p and Sds24p) of the S. pombe Sds23 protein, which is implicated in APC/cyclosome regulation; may play an indirect role in fluid-phase endocytosis; protein abundance increases in response to DNA replication stress; SDS24 has a paralog, SDS23, that arose from the whole genome duplication
Sbay_11.240	0.994398	0.353351	YKR009C	FOX2	2.83005	0.523862	Multifunctional enzyme of the peroxisomal fatty acid beta-oxidation pathway; has 3-hydroxyacyl-CoA dehydrogenase and enoyl-CoA hydratase activities
Sbay_11.312	0.999474	0.353768	YKR076W	ECM4	2.82671	0.591402	Omega class glutathione transferase; not essential; similar to Ygr154cp; green fluorescent protein (GFP)-fusion protein localizes to the cytoplasm
Sbay_13.422	1	0.354613	YMR238W	DFG5	2.81998	1	Putative mannosidase, essential glycosylphosphatidylinositol (GPI)-anchored membrane protein required for cell wall biogenesis in bud formation, involved in filamentous growth, homologous to Dcw1p
Sbay_2.440	1	0.355887	YDR275W	BSC2	2.80988	1	Protein of unknown function; ORF exhibits genomic organization compatible with a translational readthrough-dependent mode of expression; BSC2 has a paralog, IRC23, that arose from the whole genome duplication
Sbay_14.379	1	0.355997	YNR024W	MPP6	2.80901	1	Nuclear exosome-associated RNA binding protein; involved in surveillance of pre-rRNAs and pre-mRNAs, and the degradation of cryptic non-coding RNAs (ncRNA); copurifies with ribosomes
Sbay_10.319	1	0.356003	YLR225C		2.80897	1	Putative protein of unknown function; green fluorescent protein (GFP)-fusion protein localizes to the cytoplasm; YLR225C is not an essential gene
Sbay_16.205	1	0.356143	YPL107W		2.80786	1	Putative protein of unknown function; green fluorescent protein (GFP)-fusion protein localizes to mitochondria; YPL107W is not an essential gene
Sbay_4.388	1	0.3576	YBR139W		2.79642	0.700889	Putative serine type carboxypeptidase with a role in phytochelatin synthesis; green fluorescent protein (GFP)-fusion protein localizes to the vacuole; expression induced by nitrogen limitation in a GLN3, GAT1-independent manner
Sbay_7.192	1	0.358328	YGL078C	DBP3	2.79074	1	RNA-Dependent ATPase, member of DExD/H-box family; involved in cleavage of site A3 within the ITS1 spacer during rRNA processing; not essential for growth, but deletion causes severe slow-growth phenotype
Sbay_13.117	1	0.358345	YML043C	RRN11	2.7906	1	Component of the core factor (CF) rDNA transcription factor complex; CF is required for transcription of 35S rRNA genes by RNA polymerase I and is composed of Rrn6p, Rrn7p, and Rrn11p
Sbay_6.282	1	0.358571	YJL203W	PRP21	2.78885	1	Subunit of the SF3a splicing factor complex, required for spliceosome assembly
Sbay_15.236	0.999991	0.358586	YHR048W	YHK8	2.78873	1	Presumed antiporter of the major facilitator superfamily; member of the 12-spanner drug:H(+) antiporter DHA1 family; expression of gene is up-regulated in cells exhibiting reduced susceptibility to azoles
Sbay_11.254	1	0.358679	YKR022C	NTR2	2.78801	1	Essential protein that forms a dimer with Ntr1p; also forms a trimer, with Ntr2p and the DExD/H-box RNA helicase Prp43p, that is involved in spliceosome disassembly
Sbay_8.62	1	0.358926	YHR006W	STP2	2.78609	1	Transcription factor; activated by proteolytic processing in response to signals from the SPS sensor system for external amino acids; activates transcription of amino acid permease genes; STP2 has a paralog, STP1, that arose from the whole genome duplication
Sbay_14.161	1	0.358994	YNL180C	RHO5	2.78557	1	Non-essential small GTPase of the Rho/Rac subfamily of Ras-like proteins, likely involved in protein kinase C (Pkc1p)-dependent signal transduction pathway that controls cell integrity
Sbay_11.287	1	0.360571	YKR053C	YSR3	2.77338	1	Dihydrosphingosine 1-phosphate phosphatase; membrane protein involved in sphingolipid metabolism; YSR3 has a paralog, LCB3, that arose from the whole genome duplication
Sbay_14.149	1	0.361745	YNL192W	CHS1	2.76438	1	Chitin synthase I, requires activation from zymogenic form in order to catalyze the transfer of N-acetylglucosamine (GlcNAc) to chitin; required for repairing the chitin septum during cytokinesis; transcription activated by mating factor
Sbay_16.353	0.999962	0.363663	YPR026W	ATH1	2.7498	0.713351	Acid trehalase required for utilization of extracellular trehalose
Sbay_2.355	1	0.363925	YDR186C		2.74782	1	Putative protein of unknown function; may interact with ribosomes, based on co-purification experiments; green fluorescent protein (GFP)-fusion protein localizes to the cytoplasm
Sbay_10.466	0.999999	0.363926	YLR363W-A		2.74781	1	Protein of unknown function; green fluorescent protein (GFP)-fusion protein localizes to the nucleus; relocalizes from nucleus to nucleolus upon DNA replication stress
Sbay_2.157	1	0.365264	YBR028C	YPK3	2.73774	1	An AGC kinase phosphorylated by cAMP-dependent protein kinase (PKA) in a TORC1-dependent manner
Sbay_5.80	1	0.365627	YEL006W	YEA6	2.73503	1	Putative mitochondrial NAD+ transporter, member of the mitochondrial carrier subfamily (see also YIA6); has putative human ortholog
Sbay_5.260	1	0.367138	YER137C		2.72377	1	Putative protein of unknown function
Sbay_5.89	1	0.367387	YER002W	NOP16	2.72193	1.50644	Constituent of 66S pre-ribosomal particles, involved in 60S ribosomal subunit biogenesis
Sbay_7.346	1	0.367931	YGR065C	VHT1	2.7179	1	High-affinity plasma membrane H+-biotin (vitamin H) symporter; mutation results in fatty acid auxotrophy; 12 transmembrane domain containing major facilitator subfamily member; mRNA levels negatively regulated by iron deprivation and biotin
Sbay_16.268	1	0.368398	YPL047W	SGF11	2.71446	1	Integral subunit of SAGA histone acetyltransferase complex, regulates transcription of a subset of SAGA-regulated genes, required for the Ubp8p association with SAGA and for H2B deubiquitylation
Sbay_7.339	1	0.368971	YGR057C	LST7	2.71024	1	Protein possibly involved in a post-Golgi secretory pathway; required for the transport of nitrogen-regulated amino acid permease Gap1p from the Golgi to the cell surface
Sbay_15.296	1	0.36912	YHR101C	BIG1	2.70915	1	Integral membrane protein of the endoplasmic reticulum, required for normal content of cell wall beta-1,6-glucan
Sbay_8.335	1	0.369975	YOR287C	RRP36	2.70288	1	Component of 90S preribosomes; involved in early cleavages of the 35S pre-rRNA and in production of the 40S ribosomal subunit
Sbay_6.228	1	0.370074	YJL148W	RPA34	2.70216	1	RNA polymerase I subunit A34.5
Sbay_11.21	1	0.372032	YKL201C	MNN4	2.68794	0.58815	Putative positive regulator of mannosylphosphate transferase Mnn6p; involved in mannosylphosphorylation of N-linked oligosaccharides; expression increases in late-logarithmic and stationary growth phases; MNN4 has a paralog, YJR061W, that arose from the whole genome duplication
Sbay_8.427	1	0.372424	YOR371C	GPB1	2.68511	1	Multistep regulator of cAMP-PKA signaling; inhibits PKA downstream of Gpa2p and Cyr1p, thereby increasing cAMP dependency; promotes ubiquitin-dependent proteolysis of Ira2p; regulated by G-alpha protein Gpa2p; GPB1 has a paralog, GPB2, that arose from the whole genome duplication
Sbay_2.219	1	0.372688	YDR060W	MAK21	2.68321	1	Constituent of 66S pre-ribosomal particles, required for large (60S) ribosomal subunit biogenesis; involved in nuclear export of pre-ribosomes; required for maintenance of dsRNA virus; homolog of human CAATT-binding protein
Sbay_4.3	1	0.373373	NA	NA	2.67829	1	NA
Sbay_10.114	1	0.373688	YLR034C	SMF3	2.67603	0.382015	Putative divalent metal ion transporter involved in iron homeostasis; transcriptionally regulated by metal ions; member of the Nramp family of metal transport proteins; protein abundance increases in response to DNA replication stress
Sbay_4.551	1	0.374741	YBR291C	CTP1	2.66851	1	Mitochondrial inner membrane citrate transporter, member of the mitochondrial carrier family
Sbay_9.64	1	0.375135	YIL127C	RRT14	2.66571	2.20746	Putative protein of unknown function; identified in a screen for mutants with decreased levels of rDNA transcription; green fluorescent protein (GFP)-fusion protein localizes to the nucleolus; predicted to be involved in ribosome biogenesis
Sbay_9.49	0.999639	0.375591	YIL139C	REV7	2.66247	1	Accessory subunit of DNA polymerase zeta, involved in translesion synthesis during post-replication repair; required for mutagenesis induced by DNA damage; involved in double-strand break repair
Sbay_9.210	0.999734	0.375848	YIR001C	SGN1	2.66065	1	Cytoplasmic RNA-binding protein, contains an RNA recognition motif (RRM); may have a role in mRNA translation, as suggested by genetic interactions with genes encoding proteins involved in translational initiation
Sbay_5.23	1	0.376008	YEL047C	FRD1	2.65952	0.455153	Soluble fumarate reductase; required with isoenzyme Osm1p for anaerobic growth; may interact with ribosomes, based on co-purification experiments; authentic, non-tagged protein is detected in purified mitochondria in high-throughput studies; similar to Arxula adeninovorans fumarate reductase; protein abundance increases in response to DNA replication stress; FRD1 has a paralog, OSM1, that arose f…
Sbay_7.292	1	0.376674	YGR009C	SEC9	2.65482	1	t-SNARE protein important for fusion of secretory vesicles with the plasma membrane; similar to but not functionally redundant with Spo20p; SNAP-25 homolog
Sbay_10.87	1	0.377148	YLR009W	RLP24	2.65148	1	Essential protein required for ribosomal large subunit biogenesis; associated with pre-60S ribosomal subunits; stimulates the ATPase activity of Afg2p, which is required for release of Rlp24p from the pre-60S particle; has similarity to Rpl24Ap and Rpl24Bp
Sbay_13.490	1	0.377242	YMR300C	ADE4	2.65082	1	Phosphoribosylpyrophosphate amidotransferase (PRPPAT; amidophosphoribosyltransferase), catalyzes first step of the 'de novo' purine nucleotide biosynthetic pathway
Sbay_7.213	1	0.378482	YGL058W	RAD6	2.64213	1	Ubiquitin-conjugating enzyme (E2), involved in postreplication repair (as a heterodimer with Rad18p), DSBR and checkpoint control (as a heterodimer with Bre1p), ubiquitin-mediated N-end rule protein degradation (as a heterodimer with Ubr1p
Sbay_4.216	1	0.379453	YDL035C	GPR1	2.63537	0.70007	Plasma membrane G protein coupled receptor (GPCR) that interacts with the heterotrimeric G protein alpha subunit, Gpa2p, and with Plc1p; sensor that integrates nutritional signals with the modulation of cell fate via PKA and cAMP synthesis
Sbay_2.295	0.99992	0.379741	YDR132C		2.63337	1	Protein of unknown function; protein increases in abundance and relative distribution to the nucleus increases upon DNA replication stress; YDR132C has a paralog, YLR108C, that arose from the whole genome duplication
Sbay_7.425	1	0.380844	YGR138C	TPO2	2.62575	0.355484	Polyamine transporter of the major facilitator superfamily; member of the 12-spanner drug:H(+) antiporter DHA1 family; specific for spermine; localizes to the plasma membrane; transcription of TPO2 is regulated by Haa1p; TPO2 has a paralog, TPO3, that arose from the whole genome duplication
Sbay_2.538	1	0.381495	YDR365C	ESF1	2.62127	1	Nucleolar protein involved in pre-rRNA processing; depletion causes severely decreased 18S rRNA levels
Sbay_11.137	1	0.381805	YKL088W	CAB3	2.61914	1	Subunit of a phosphopantothenoylcysteine decarboxylase (PPCDC; Cab3p, Sis2p, Vhs3p) complex, which catalyzes the third step of coenzyme A biosynthesis; null mutant lethality is complemented by E. coli coaBC
Sbay_4.76	1	0.382054	YDL170W	UGA3	2.61743	1	Transcriptional activator necessary for gamma-aminobutyrate (GABA)-dependent induction of GABA genes (such as UGA1, UGA2, UGA4); zinc-finger transcription factor of the Zn(2)-Cys(6) binuclear cluster domain type; localized to the nucleus
Sbay_4.404	1	0.382243	YBR154C	RPB5	2.61614	1	RNA polymerase subunit ABC27, common to RNA polymerases I, II, and III; contacts DNA and affects transactivation
Sbay_8.102	1	0.383057	YOR051C	ETT1	2.61058	1	Nuclear protein that inhibits replication of Brome mosaic virus in S. cerevisiae, which is a model system for studying replication of positive-strand RNA viruses in their natural hosts; deletion increases stop codon readthrough
Sbay_15.263	1	0.384014	YHR072W-A	NOP10	2.60407	1	Constituent of small nucleolar ribonucleoprotein particles containing H/ACA-type snoRNAs, which are required for pseudouridylation and processing of pre-18S rRNA
Sbay_10.392	1	0.385535	YLR298C	YHC1	2.5938	1	Component of the U1 snRNP complex required for pre-mRNA splicing; putative ortholog of human U1C protein, which is involved in formation of a complex between U1 snRNP and the pre-mRNA 5' splice site
Sbay_2.92	1	0.385673	YBL028C		2.59287	1	Protein of unknown function that may interact with ribosomes; green fluorescent protein (GFP)-fusion protein localizes to the nucleolus; predicted to be involved in ribosome biogenesis
Sbay_4.301	1	0.385801	YBR061C	TRM7	2.59201	1	2'-O-ribose methyltransferase; methylates the 2'-O-ribose of tRNA-Phe, tRNA-Trp, and tRNA-Leu at positions C32 and N34 of the tRNA anticodon loop; crucial biological role likely modification of tRNA-Phe; interacts with Trm732p and Rtt10p in 2'-O-methylation of C32 and N34 substrate tRNAs, respectively
Sbay_15.244	1	0.386258	NA	NA	2.58894	1	NA
Sbay_16.387	1	0.38673	YPR060C	ARO7	2.58578	1	Chorismate mutase, catalyzes the conversion of chorismate to prephenate to initiate the tyrosine/phenylalanine-specific branch of aromatic amino acid biosynthesis
Sbay_15.340	0.999999	0.388556	YHR143W	DSE2	2.57363	0.315065	Daughter cell-specific secreted protein with similarity to glucanases, degrades cell wall from the daughter side causing daughter to separate from mother; expression is repressed by cAMP
Sbay_4.34	1	0.388675	YDL213C	NOP6	2.57285	2.39373	rRNA-binding protein required for 40S ribosomal subunit biogenesis; contains an RNA recognition motif (RRM); hydrophilin essential to overcome the stress of the desiccation-rehydration process; NOP6 may be a fungal-specific gene as no homologs have been yet identified in higher eukaryotes
Sbay_15.281	0.999997	0.389029	YHR087W	RTC3	2.5705	0.639599	Protein of unknown function involved in RNA metabolism; has structural similarity to SBDS, the human protein mutated in Shwachman-Diamond Syndrome (the yeast SBDS ortholog = SDO1); null mutation suppresses cdc13-1 temperature sensitivity; protein abundance increases in response to DNA replication stress
Sbay_5.148	0.999984	0.389597	YER046W	SPO73	2.56676	0.298867	Meiosis-specific protein of unknown function, required for spore wall formation during sporulation; dispensible for both nuclear divisions during meiosis
Sbay_15.110	1	0.389617	YOL055C	THI20	2.56662	0.230462	Trifunctional enzyme of thiamine biosynthesis, degradation and salvage; has hydroxymethylpyrimidine (HMP) kinase, HMP-phosphate (HMP-P) kinase and thiaminase activities; member of a gene family with THI21 and THI22; HMP and HMP-P kinase activity redundant with Thi21p
Sbay_2.576	1	0.389623	YDR399W	HPT1	2.56658	1	Dimeric hypoxanthine-guanine phosphoribosyltransferase, catalyzes the transfer of the phosphoribosyl portion of 5-phosphoribosyl-alpha-1-pyrophosphate to a purine base (either guanine or hypoxanthine) to form pyrophosphate and a purine nucleotide (either guanosine monophosphate or inosine monophosphate); mutations in the human homolog HPRT1 can cause Lesch-Nyhan syndrome and Kelley-Seegmiller syn…
Sbay_2.193	1	0.389649	YDR035W	ARO3	2.56641	1	3-deoxy-D-arabino-heptulosonate-7-phosphate (DAHP) synthase, catalyzes the first step in aromatic amino acid biosynthesis and is feedback-inhibited by phenylalanine or high concentration of tyrosine or tryptophan
Sbay_10.244	1	0.389942	YLR146W-A		2.56448	1	Putative protein of unknown function
Sbay_7.355	1	0.391616	YGR072W	UPF3	2.55352	1	Component of the nonsense-mediated mRNA decay (NMD) pathway, along with Nam7p and Nmd2p; involved in decay of mRNA containing nonsense codons; involved in telomere maintenance
Sbay_15.331	1	0.391919	YHR134W	WSS1	2.55155	1	Sumoylated protein that localizes to a single spot on the nuclear periphery of mother cells but not daughters; interacts genetically with SMT3; UV-sensitive mutant phenotype and genetic interactions suggest a role in the DNA damage response
Sbay_2.640	1	0.39281	YDR464W	SPP41	2.54576	1	Protein involved in negative regulation of expression of spliceosome components PRP4 and PRP3
Sbay_8.154	0.999428	0.39288	YOR100C	CRC1	2.54531	0.456407	Mitochondrial inner membrane carnitine transporter, required for carnitine-dependent transport of acetyl-CoA from peroxisomes to mitochondria during fatty acid beta-oxidation
Sbay_9.242	1	0.393097	YIR026C	YVH1	2.5439	1	Protein phosphatase involved in vegetative growth at low temperatures, sporulation, and glycogen accumulation; mutants are defective in 60S ribosome assembly; member of the dual-specificity family of protein phosphatases
Sbay_10.340	1	0.394744	YLR244C	MAP1	2.53328	1	Methionine aminopeptidase, catalyzes the cotranslational removal of N-terminal methionine from nascent polypeptides; function is partially redundant with that of Map2p
Sbay_9.70	1	0.394899	YIL120W	QDR1	2.53229	1	Multidrug transporter of the major facilitator superfamily; member of the 12-spanner drug:H(+) antiporter DHA1 family; required for resistance to quinidine, ketoconazole, fluconazole, and barban; QDR1 has a paralog, AQR1, that arose from the whole genome duplication
Sbay_13.340	1	0.394922	YMR161W	HLJ1	2.53215	1	Co-chaperone for Hsp40p, anchored in the ER membrane; with its homolog Ydj1p promotes ER-associated protein degradation (ERAD) of integral membrane substrates; similar to E. coli DnaJ
Sbay_13.236	1	0.395926	YMR062C	ARG7	2.52572	1	Mitochondrial ornithine acetyltransferase, catalyzes the fifth step in arginine biosynthesis; also possesses acetylglutamate synthase activity, regenerates acetylglutamate while forming ornithine
Sbay_13.287	1	0.396148	YMR108W	ILV2	2.52431	2.08717	Acetolactate synthase, catalyses the first common step in isoleucine and valine biosynthesis and is the target of several classes of inhibitors, localizes to the mitochondria; expression of the gene is under general amino acid control
Sbay_13.431	1	0.396151	YMR246W	FAA4	2.52429	1	Long chain fatty acyl-CoA synthetase; activates imported fatty acids with a preference for C12:0-C16:0 chain lengths; functions in long chain fatty acid import; important for survival during stationary phase; localized to lipid particles; involved in sphingolipid-to-glycerolipid metabolism; forms cytoplasmic foci upon DNA replication stress; FAA4 has a paralog, FAA1, that arose from the whole gen…
Sbay_15.347	1	0.396563	YHR148W	IMP3	2.52167	1	Component of the SSU processome, which is required for pre-18S rRNA processing, essential protein that interacts with Mpp10p and mediates interactions of Imp4p and Mpp10p with U3 snoRNA
Sbay_14.317	1	0.397325	YNL029C	KTR5	2.51683	1	Putative mannosyltransferase involved in protein glycosylation; member of the KRE2/MNT1 mannosyltransferase family; KTR5 has a paralog, KTR7, that arose from the whole genome duplication
Sbay_7.380	1	0.397454	YGR097W	ASK10	2.51601	1	Component of RNA polymerase II holoenzyme; phosphorylated in response to oxidative stress; has a role in destruction of Ssn8p; proposed to function in activation of the glycerol channel Fps1p; ASK10 has a paralog, RGC1, that arose from the whole genome duplication
Sbay_8.301	1	0.398151	YOR252W	TMA16	2.51161	2.35632	Protein of unknown function that associates with ribosomes
Sbay_16.466	1	0.398182	YPR138C	MEP3	2.51142	1	Ammonium permease of high capacity and low affinity; belongs to a ubiquitous family of cytoplasmic membrane proteins that transport only ammonium (NH4+); expression is under the nitrogen catabolite repression regulation ammonia permease
Sbay_14.31	1	0.39876	YNL308C	KRI1	2.50778	1	Essential nucleolar protein required for 40S ribosome biogenesis; associate with snR30; physically and functionally interacts with Krr1p
Sbay_15.282	1	0.398931	YHR088W	RPF1	2.5067	2.48838	Nucleolar protein involved in the assembly and export of the large ribosomal subunit; constituent of 66S pre-ribosomal particles; contains a sigma(70)-like motif, which is thought to bind RNA
Sbay_2.398	1	0.39907	YDR232W	HEM1	2.50583	1	5-aminolevulinate synthase, catalyzes the first step in the heme biosynthetic pathway; an N-terminal signal sequence is required for localization to the mitochondrial matrix; expression is regulated by Hap2p-Hap3p
Sbay_10.421	1	0.399315	YLR326W		2.50429	1	Putative protein of unknown function, predicted to be palmitoylated
Sbay_8.16	1	0.399449	YHL035C	VMR1	2.50345	0.316682	Vacuolar membrane protein involved in multiple drug resistance and metal sensitivity; ATP-binding cassette (ABC) family member involved in drug transport; potential Cdc28p substrate; induced under respiratory conditions
Sbay_8.161	1	0.400615	YOR108W	LEU9	2.49616	1.99296	Alpha-isopropylmalate synthase II (2-isopropylmalate synthase); catalyzes the first step in the leucine biosynthesis pathway; the minor isozyme, responsible for the residual alpha-IPMS activity detected in a leu4 null mutant; LEU9 has a paralog, LEU4, that arose from the whole genome duplication
Sbay_5.40	1	0.400765	YEL029C	BUD16	2.49523	1	Putative pyridoxal kinase, a key enzyme involved in pyridoxal 5'-phosphate synthesis, the active form of vitamin B6; required for genome integrity; involved in bud-site selection; similarity to yeast BUD17 and human pyridoxal kinase (PDXK)
Sbay_10.407	0.999492	0.400947	YLR312C		2.4941	1	Putative protein of unknown function
Sbay_8.187	0.99963	0.402157	YOR134W	BAG7	2.48659	1	Rho GTPase activating protein (RhoGAP), stimulates the intrinsic GTPase activity of Rho1p, which plays a role in actin cytoskeleton organization and control of cell wall synthesis; structurally and functionally related to Sac7p
Sbay_4.496	1	0.402321	YBR238C		2.48558	1	Mitochondrial membrane protein with similarity to Rmd9p; not required for respiratory growth but causes a synthetic respiratory defect in combination with rmd9 mutations; transcriptionally up-regulated by TOR; deletion increases life span
Sbay_16.200	0.998914	0.402565	YPL110C	GDE1	2.48407	0.596805	Glycerophosphocholine (GroPCho) phosphodiesterase; hydrolyzes GroPCho to choline and glycerolphosphate, for use as a phosphate source and as a precursor for phosphocholine synthesis; may interact with ribosomes
Sbay_15.364	0.998824	0.403083	NA	NA	2.48088	1	NA
Sbay_12.18	1	0.403333	YFR039C		2.47934	1	Putative protein of unknown function; may be involved in response to high salt and changes in carbon source; deletion mutant has decreased spore survival in Drosophila feces
Sbay_4.494	1	0.403489	YBR237W	PRP5	2.47838	1	RNA helicase in the DEAD-box family, necessary for prespliceosome formation, bridges U1 and U2 snRNPs and enables stable U2 snRNP association with intron RNA
Sbay_2.441	1	0.403974	YDR276C	PMP3	2.47541	1	Small plasma membrane protein related to a family of plant polypeptides that are overexpressed under high salt concentration or low temperature, not essential for viability, deletion causes hyperpolarization of the plasma membrane potential
Sbay_11.51	1	0.404135	YKL172W	EBP2	2.47442	3.07861	Required for 25S rRNA maturation and 60S ribosomal subunit assembly; localizes to the nucleolus and in foci along nuclear periphery; constituent of 66S pre-ribosomal particles; cooperates with Rrs1p and Mps3p to mediate telomere clustering by binding Sir4p, but is not involved in telomere tethering
Sbay_5.175	0.999401	0.406545	YER065C	ICL1	2.45976	1	Isocitrate lyase, catalyzes the formation of succinate and glyoxylate from isocitrate, a key reaction of the glyoxylate cycle; expression of ICL1 is induced by growth on ethanol and repressed by growth on glucose
Sbay_13.439	1	0.407421	YMR255W	GFD1	2.45446	1	Coiled-coiled protein of unknown function; identified as a high-copy suppressor of a dbp5 mutation; protein abundance increases in response to DNA replication stress
Sbay_15.41	1	0.407718	YOL119C	MCH4	2.45268	1	Protein with similarity to mammalian monocarboxylate permeases, which are involved in transport of monocarboxylic acids across the plasma membrane; mutant is not deficient in monocarboxylate transport
Sbay_5.91	1	0.408103	YER004W	FMP52	2.45036	1	Protein of unknown function, localized to the mitochondrial outer membrane; induced by treatment with 8-methoxypsoralen and UVA irradiation
Sbay_5.219	1	0.409048	YER100W	UBC6	2.4447	1	Ubiquitin-conjugating enzyme involved in ER-associated protein degradation; located at the cytosolic side of the ER membrane; tail region contains a transmembrane segment at the C-terminus; substrate of the ubiquitin-proteasome pathway
Sbay_8.226	0.998803	0.410505	YOR173W	DCS2	2.43602	0.247816	Non-essential, stress induced regulatory protein; modulates m7G-oligoribonucleotide metabolism; inhibits Dcs1p; regulated by Msn2p, Msn4p, and the Ras-cAMP-cAPK signaling pathway; mutant has increased aneuploidy tolerance
Sbay_2.141	1	0.411103	YBR014C	GRX7	2.43248	0.490525	Cis-golgi localized monothiol glutaredoxin; more similar in activity to dithiol than other monothiol glutaredoxins; involved in the oxidative stress response; does not bind metal ions; GRX7 has a paralog, GRX6, that arose from the whole genome duplication
Sbay_11.195	1	0.411794	YKL029C	MAE1	2.4284	1	Mitochondrial malic enzyme, catalyzes the oxidative decarboxylation of malate to pyruvate, which is a key intermediate in sugar metabolism and a precursor for synthesis of several amino acids
Sbay_13.354	1	0.412651	YMR173W	DDR48	2.42336	1	DNA damage-responsive protein; expression is increased in response to heat-shock stress or treatments that produce DNA lesions; contains multiple repeats of the amino acid sequence NNNDSYGS; protein abundance increases in response to DNA replication stress
Sbay_16.164	1	0.412774	YPL146C	NOP53	2.42263	1	Nucleolar protein; involved in biogenesis of the 60S subunit of the ribosome; interacts with rRNA processing factors Cbf5p and Nop2p; null mutant is viable but growth is severely impaired
Sbay_11.102	1	0.4144	YKL122C	SRP21	2.41313	1	Subunit of the signal recognition particle (SRP), which functions in protein targeting to the endoplasmic reticulum membrane; not found in mammalian SRP; forms a pre-SRP structure in the nucleolus that is translocated to the cytoplasm
Sbay_9.6	1	0.414738	NA	NA	2.41116	1	NA
Sbay_12.16	1	0.415114	YFR041C	ERJ5	2.40898	1	Type I membrane protein with a J domain is required to preserve the folding capacity of the endoplasmic reticulum; loss of the non-essential ERJ5 gene leads to a constitutively induced unfolded protein response
Sbay_4.326	1	0.415583	YBR082C	UBC4	2.40626	1	Ubiquitin-conjugating enzyme (E2); mediates degradation of abnormal or excess proteins, including calmodulin and histone H3; interacts with many SCF ubiquitin protein ligases; component of the cellular stress response; UBC4 has a paralog, UBC5, that arose from the whole genome duplication
Sbay_6.64	1	0.416387	YFR001W	LOC1	2.40161	1	Nuclear protein involved in asymmetric localization of ASH1 mRNA; binds double-stranded RNA in vitro; constituent of 66S pre-ribosomal particles; relocalizes from nucleus to cytoplasm upon DNA replication stress
Sbay_16.94	1	0.416524	YPL212C	PUS1	2.40082	1	tRNA:pseudouridine synthase, introduces pseudouridines at positions 26-28, 34-36, 65, and 67 of tRNA; nuclear protein that appears to be involved in tRNA export; also acts on U2 snRNA
Sbay_16.113	0.999991	0.41672	YPL193W	RSA1	2.39969	1	Protein involved in the assembly of 60S ribosomal subunits; functionally interacts with Dbp6p; functions in a late nucleoplasmic step of the assembly
Sbay_11.333	1	0.41694	YKR096W	ESL2	2.39843	0.742822	Protein of unknown function that interacts with Pex14p; may interact with ribosomes, based on co-purification experiments; green fluorescent protein (GFP)-fusion protein localizes to the nucleus and cytoplasm; predicted to contain a PINc domain
Sbay_8.378	1	0.417388	YOR327C	SNC2	2.39585	1	Vesicle membrane receptor protein (v-SNARE); involved in the fusion between Golgi-derived secretory vesicles with the plasma membrane; member of the synaptobrevin/VAMP family of R-type v-SNARE proteins; SNC2 has a paralog, SNC1, that arose from the whole genome duplication
Sbay_16.486	1	0.417546	YPR158W	CUR1	2.39495	1	Sorting factor, central regulator of spatial protein quality control; physically and functionally interacts with chaperones to promote sorting and deposition of misfolded proteins into cytosolic compartments; involved in destabilization of [URE3] prions; CUR1 has a paralog, BTN2, that arose from the whole genome duplication
Sbay_7.276	1	0.418469	YGL006W	PMC1	2.38966	0.523887	Vacuolar Ca2+ ATPase involved in depleting cytosol of Ca2+ ions; prevents growth inhibition by activation of calcineurin in the presence of elevated concentrations of calcium; similar to mammalian PMCA1a
Sbay_2.236	1	0.418574	YDR077W	SED1	2.38906	1	Major stress-induced structural GPI-cell wall glycoprotein in stationary-phase cells, associates with translating ribosomes, possible role in mitochondrial genome maintenance; ORF contains two distinct variable minisatellites
Sbay_2.509	1	0.419567	YDR339C	FCF1	2.38341	1	Putative PINc domain nuclease required for early cleavages of 35S pre-rRNA and maturation of 18S rRNA; component of the SSU (small subunit) processome involved in 40S ribosomal subunit biogenesis; copurifies with Faf1p
Sbay_13.118	0.989883	0.419733	YML042W	CAT2	2.38247	0.603466	Carnitine acetyl-CoA transferase present in both mitochondria and peroxisomes, transfers activated acetyl groups to carnitine to form acetylcarnitine which can be shuttled across membranes
Sbay_13.382	1	0.420354	YMR200W	ROT1	2.37894	1	Molecular chaperone involved in protein folding in the ER; mutation causes defects in cell wall synthesis and in lysis of autophagic bodies, suppresses tor2 mutations, and is synthetically lethal with kar2-1 and with rot2 mutations; involved in N-linked glycosylation and O-mannosylation
Sbay_8.343	1	0.420374	YOR294W	RRS1	2.37883	2.65946	Essential protein that binds ribosomal protein L11; required for nuclear export of the 60S pre-ribosomal subunit during ribosome biogenesis; localizes to the nucleolus and in foci along nuclear periphery; cooperates with Ebp2p and Mps3p to mediate telomere clustering by binding Sir4p, but is not involved in telomere tethering; mouse homolog shows altered expression in Huntington's disease model m…
Sbay_5.163	1	0.420525	NA	NA	2.37798	2.51459	NA
Sbay_4.196	1	0.420594	YDL054C	MCH1	2.37759	1	Protein with similarity to mammalian monocarboxylate permeases, which are involved in transport of monocarboxylic acids across the plasma membrane; mutant is not deficient in monocarboxylate transport
Sbay_11.142	1	0.42061	YKL082C	RRP14	2.3775	1	Essential protein, constituent of 66S pre-ribosomal particles; interacts with proteins involved in ribosomal biogenesis and cell polarity; member of the SURF-6 family
Sbay_2.453	1	0.422059	YDR287W	INM2	2.36934	0.619719	Inositol monophosphatase, involved in biosynthesis of inositol; enzymatic activity requires magnesium ions and is inhibited by lithium and sodium ions; inm1 inm2 double mutant lacks inositol auxotrophy
Sbay_8.224	0.98459	0.422261	YOR171C	LCB4	2.3682	1	Sphingoid long-chain base kinase, responsible for synthesis of long-chain base phosphates, which function as signaling molecules, regulates synthesis of ceramide from exogenous long-chain bases, localizes to the Golgi and late endosomes
Sbay_11.125	1	0.422436	YKL099C	UTP11	2.36722	1	Subunit of U3-containing Small Subunit (SSU) processome complex involved in production of 18S rRNA and assembly of small ribosomal subunit
Sbay_2.271	0.999974	0.422467	YDR111C	ALT2	2.36705	1	Catalytically inactive paralog of ALT1, an alanine transaminase; expression is repressed in the presence of alanine and repression is mediated by Nrg1p
Sbay_13.480	1	0.422516	YMR290C	HAS1	2.36677	3.57766	ATP-dependent RNA helicase; localizes to both the nuclear periphery and nucleolus; highly enriched in nuclear pore complex fractions; constituent of 66S pre-ribosomal particles
Sbay_8.439	1	0.42264	NA	NA	2.36608	0.0222934	NA
Sbay_12.202	1	0.424098	YJR111C		2.35795	1	Putative protein of unknown function; green fluorescent protein (GFP)-fusion protein localizes to the mitochondria
Sbay_15.419	1	0.424242	NA	NA	2.35715	1	NA
Sbay_10.530	1	0.425327	YLR414C	PUN1	2.35113	1	Plasma membrane protein with a role in cell wall integrity; co-localizes with Sur7p in punctate membrane patches; null mutant displays decreased thermotolerance; transcription induced upon cell wall damage and metal ion stress
Sbay_8.440	1	0.425896	NA	NA	2.34799	0.0237214	NA
Sbay_15.416	0.992656	0.426278	YHR209W	CRG1	2.34589	0.523899	S-AdoMet-dependent methyltransferase involved in lipid homeostasis; mediates resistance to a drug cantharidin
Sbay_5.185	1	0.426944	YER073W	ALD5	2.34223	1.97609	Mitochondrial aldehyde dehydrogenase, involved in regulation or biosynthesis of electron transport chain components and acetate formation; activated by K+; utilizes NADP+ as the preferred coenzyme; constitutively expressed
Sbay_13.170	1	0.427492	YMR008C	PLB1	2.33923	1	Phospholipase B (lysophospholipase) involved in lipid metabolism, required for deacylation of phosphatidylcholine and phosphatidylethanolamine but not phosphatidylinositol
Sbay_4.70	0.993708	0.428159	YDL177C		2.33558	1	Putative protein of unknown function; similar to the mouse IMPACT gene; YDL177C is not an essential gene
Sbay_5.247	1	0.429274	YER126C	NSA2	2.32952	1	Protein constituent of 66S pre-ribosomal particles, contributes to processing of the 27S pre-rRNA
Sbay_8.358	0.999902	0.429532	YOR306C	MCH5	2.32812	1	Plasma membrane riboflavin transporter; facilitates the uptake of vitamin B2; required for FAD-dependent processes; sequence similarity to mammalian monocarboxylate permeases, however mutants are not deficient in monocarboxylate transport
Sbay_13.207	1	0.429973	YMR038C	CCS1	2.32573	1	Copper chaperone for superoxide dismutase Sod1p; involved in oxidative stress protection; Met-X-Cys-X2-Cys motif within the N-terminal portion is involved in insertion of copper into Sod1p under conditions of copper deprivation; protein abundance increases in response to DNA replication stress
Sbay_7.429	0.999646	0.430802	YGR142W	BTN2	2.32125	1	v-SNARE binding protein; facilitates specific protein retrieval from a late endosome to the Golgi; modulates arginine uptake, possible role in mediating pH homeostasis between the vacuole and plasma membrane H(+)-ATPase; BTN2 has a paralog, CUR1, that arose from the whole genome duplication
Sbay_8.25	0.999742	0.431001	YHL026C		2.32018	1	Putative protein of unknown function; transcriptionally regulated by Upc2p via an upstream sterol response element; YHL026C is not an essential gene; in 2005 the start site was moved 141 nt upstream (see Locus History)
Sbay_14.136	1	0.431303	YNL207W	RIO2	2.31856	1	Essential serine kinase involved in the processing of the 20S pre-rRNA into mature 18S rRNA; has similarity to Rio1p
Sbay_15.86	1	0.431886	YOL080C	REX4	2.31543	1	Putative RNA exonuclease possibly involved in pre-rRNA processing and ribosome assembly
Sbay_10.318	1	0.431985	YLR224W		2.31489	1	F-box protein and component of SCF ubiquitin ligase complexes involved in ubiquitin-dependent protein catabolism; readily monoubiquitinated in vitro by SCF-Ubc4 complexes; YLR224W is not an essential gene
Sbay_14.18	1	0.432635	YNL322C	KRE1	2.31142	1	Cell wall glycoprotein involved in beta-glucan assembly; serves as a K1 killer toxin membrane receptor
Sbay_2.657	1	0.432707	YDR483W	KRE2	2.31103	1	Alpha1,2-mannosyltransferase of the Golgi; involved in protein mannosylation; KRE2 has a paralog, KTR6, that arose from the whole genome duplication
Sbay_10.137	0.993838	0.433454	YLR053C		2.30705	1	Putative protein of unknown function
Sbay_10.79	1	0.433735	YLR002C	NOC3	2.30555	1	Component of a nuclear complex with Noc2p and pre-replicative complexes; the Noc2p-Noc3p complex binds to 66S ribosomal precursors to mediate their maturation and intranuclear transport; binds to chromatin at active replication origins, and is required for pre-RC formation and maintenance during DNA replication licensing
Sbay_11.176	0.999564	0.433799	YKL050C		2.30521	1	Protein of unknown function; the YKL050W protein is a target of the SCFCdc4 ubiquitin ligase complex and YKL050W transcription is regulated by Azf1p
Sbay_7.178	1	0.434187	YGL091C	NBP35	2.30315	1.70496	Essential iron-sulfur cluster binding protein localized in the cytoplasm; forms a complex with Cfd1p that is involved in iron-sulfur protein assembly in the cytosol; similar to P-loop NTPases
Sbay_16.80	1	0.434463	YPL226W	NEW1	2.30169	1	ATP binding cassette protein that cosediments with polysomes and is required for biogenesis of the small ribosomal subunit; Asn/Gln-rich rich region supports [NU+] prion formation and susceptibility to [PSI+] prion induction
Sbay_2.708	0.999999	0.434486	YDR525W-A	SNA2	2.30157	1	Protein of unknown function, has similarity to Pmp3p, which is involved in cation transport; green fluorescent protein (GFP)-fusion protein localizes to the cytoplasm in a punctate pattern
Sbay_5.254	1	0.436558	YER133W	GLC7	2.29065	1	Type 1 serine/threonine protein phosphatase catalytic subunit; involved in various processes including glycogen metabolism, sporulation, mitosis; accumulates at mating projections by interaction with Afr1p; interacts with many regulatory subunits; involved in regulation of the nucleocytoplasmic shuttling of Hxk2p; import into nucleus is inhibited during spindle assembly checkpoint arrest
Sbay_3.176	1	0.436674	YCL037C	SRO9	2.29004	1.84888	Cytoplasmic RNA-binding protein; associates with translating ribosomes; involved in heme regulation of Hap1p as a component of the HMC complex, also involved in the organization of actin filaments; contains a La motif; SRO9 has a paralog, SLF1, that arose from the whole genome duplication
Sbay_2.655	1	0.43697	YDR481C	PHO8	2.28849	1	Repressible vacuolar alkaline phosphatase; regulated by levels of Pi and by Pho4p, Pho9p, Pho80p, Pho81p and Pho85p; dephosphorylates phosphotyrosyl peptides; contributes to NAD+ metabolism by producing nicotinamide riboside from NMN
Sbay_12.144	0.983592	0.437683	YJR056C		2.28476	1	Protein of unknown function; green fluorescent protein (GFP)-fusion protein localizes to both the cytoplasm and the nucleus; relative distribution to the nucleus increases upon DNA replication stress
Sbay_14.132	0.950656	0.43841	YNL211C		2.28097	1	Putative protein of unknown function; green fluorescent protein (GFP)-fusion protein localizes to mitochondria; YNL211C is not an essential gene
Sbay_7.288	1	0.439426	YGR005C	TFG2	2.2757	1	TFIIF (Transcription Factor II) middle subunit; involved in both transcription initiation and elongation of RNA polymerase II; homologous to human RAP30
Sbay_4.363	1	0.440293	YBR115C	LYS2	2.27122	0.530448	Alpha aminoadipate reductase, catalyzes the reduction of alpha-aminoadipate to alpha-aminoadipate 6-semialdehyde, which is the fifth step in biosynthesis of lysine; activation requires posttranslational phosphopantetheinylation by Lys5p
Sbay_7.485	1	0.440479	YGR191W	HIP1	2.27026	1	High-affinity histidine permease, also involved in the transport of manganese ions
Sbay_11.277	1	0.441165	YKR042W	UTH1	2.26673	1	Protein involved in cell wall biogenesis; required for mitochondrial autophagy; mitochondrial outer membrane and cell wall localized SUN family member; involved in the oxidative stress response, life span during starvation, and cell death; UTH1 has a paralog, NCA3, that arose from the whole genome duplication
Sbay_12.77	0.99996	0.441202	YJL004C	SYS1	2.26654	1	Integral membrane protein of the Golgi required for targeting of the Arf-like GTPase Arl3p to the Golgi; multicopy suppressor of ypt6 null mutation
Sbay_8.157	1	0.441591	YOR104W	PIN2	2.26454	1	Protein that induces appearance of [PIN+] prion when overproduced; predicted to be palmitoylated
Sbay_2.608	1	0.441987	YDR432W	NPL3	2.26251	1	RNA-binding protein; promotes elongation, regulates termination, and carries poly(A) mRNA from nucleus to cytoplasm; has a role in repressing translation initiation by binding eIF4G; required for pre-mRNA splicing; dissociation from mRNAs promoted by Mtr10p; phosphorylated by Sky1p in the cytoplasm; protein abundance increases in response to DNA replication stress
Sbay_13.450	1	0.442155	YMR266W	RSN1	2.26165	1.86773	Membrane protein of unknown function; overexpression suppresses NaCl sensitivity of sro7 mutant cells by restoring sodium pump (Ena1p) localization to the plasma membrane
Sbay_15.173	1	0.442254	YOL002C	IZH2	2.26114	1	Plasma membrane protein involved in zinc homeostasis and osmotin-induced apoptosis; transcription regulated by Zap1p, zinc and fatty acid levels; similar to mammalian adiponectins; deletion increases sensitivity to elevated zinc
Sbay_2.429	1	0.442432	YDR262W		2.26024	0.557564	Putative protein of unknown function; green fluorescent protein (GFP)-fusion protein localizes to the vacuole and is induced in response to the DNA-damaging agent MMS; gene expression increases in response to Zymoliase treatment
Sbay_14.124	1	0.442475	YNL218W	MGS1	2.26001	1	Protein with DNA-dependent ATPase and ssDNA annealing activities; involved in maintenance of genome; interacts functionally with DNA polymerase delta; homolog of human Werner helicase interacting protein (WHIP); forms nuclear foci upon DNA replication stress
Sbay_7.89	0.999999	0.442927	YGL174W	BUD13	2.25771	1	Subunit of the RES complex, which is required for nuclear pre-mRNA retention and splicing; involved in bud-site selection; diploid mutants display a unipolar budding pattern instead of the wild-type bipolar pattern
Sbay_13.424	1	0.443643	YMR239C	RNT1	2.25406	1	Nuclear dsRNA-specific ribonuclease (RNase III); involved in rDNA transcription, rRNA processing and U2 snRNA 3' end formation by cleavage of a stem-loop structure at the 3' end of U2 snRNA; involved in polyadenylation-independent transcription termination; involved in the cell wall stress response, regulating the degradation of cell wall integrity and morphogenesis checkpoint genes
Sbay_7.268	1	0.443796	YGL013C	PDR1	2.25329	1	Transcription factor that regulates the pleiotropic drug response; zinc cluster protein that is a master regulator involved in recruiting other zinc cluster proteins to pleiotropic drug response elements (PDREs) to fine tune the regulation of multidrug resistance genes; PDR1 has a paralog, PDR3, that arose from the whole genome duplication
Sbay_4.366	0.998466	0.444557	YBR119W	MUD1	2.24943	1	U1 snRNP A protein, homolog of human U1-A; involved in nuclear mRNA splicing
Sbay_6.127	1	0.444644	YJL052W	TDH1	2.24899	0.61529	Glyceraldehyde-3-phosphate dehydrogenase, isozyme 1; involved in glycolysis and gluconeogenesis; tetramer that catalyzes the reaction of glyceraldehyde-3-phosphate to 1,3 bis-phosphoglycerate; detected in the cytoplasm and cell wall; protein abundance increases in response to DNA replication stress
Sbay_11.219	1	0.444694	YKL009W	MRT4	2.24874	2.49398	Protein involved in mRNA turnover and ribosome assembly, localizes to the nucleolus
Sbay_11.296	0.969434	0.444713	YKR061W	KTR2	2.24864	0.512843	Mannosyltransferase involved in N-linked protein glycosylation; member of the KRE2/MNT1 mannosyltransferase family; KTR2 has a paralog, YUR1, that arose from the whole genome duplication
Sbay_2.536	1	0.44511	YDR363W-A	SEM1	2.24664	1	Component of lid subcomplex of the 26S proteasome regulatory subunit; involved in mRNA export mediated by the TREX-2 complex (Sac3p-Thp1p); ortholog of human DSS1; protein abundance increases in response to DNA replication stress
Sbay_8.142	1	0.44538	YOR089C	VPS21	2.24527	1	Rab family GTPase; required for endocytic transport and for sorting of vacuolar hydrolases; localized in endocytic intermediates; detected in mitochondria; geranylgeranylation required for membrane association; mammalian Rab5 homolog; protein abundance increases in response to DNA replication stress; VPS21 has a paralog, YPT53, that arose from the whole genome duplication
Sbay_15.255	1	0.445991	YHR066W	SSF1	2.2422	2.23348	Constituent of 66S pre-ribosomal particles; required for ribosomal large subunit maturation; functionally redundant with Ssf2p; member of the Brix family; SSF1 has a paralog, SSF2, that arose from the whole genome duplication
Sbay_11.301	1	0.446867	YKR066C	CCP1	2.2378	1	Mitochondrial cytochrome-c peroxidase; degrades reactive oxygen species in mitochondria, involved in the response to oxidative stress
Sbay_5.202	1	0.447167	YER088C	DOT6	2.2363	1	Protein involved in rRNA and ribosome biogenesis; binds polymerase A and C motif; subunit of the RPD3L histone deacetylase complex; has chromatin specific SANT domain; involved in telomeric gene silencing and filamentation; DOT6 has a paralog, TOD6, that arose from the whole genome duplication; relative distribution to the nucleus increases upon DNA replication stress
Sbay_10.293	1	0.448438	YLR197W	NOP56	2.22996	1	Essential evolutionarily-conserved nucleolar protein component of the box C/D snoRNP complexes that direct 2'-O-methylation of pre-rRNA during its maturation; overexpression causes spindle orientation defects
Sbay_7.386	1	0.448445	YGR103W	NOP7	2.22993	2.91079	Component of several different pre-ribosomal particles; forms a complex with Ytm1p and Erb1p that is required for maturation of the large ribosomal subunit; required for exit from G<sub>0</sub> and the initiation of cell proliferation
Sbay_2.437	1	0.449072	YDR270W	CCC2	2.22682	0.356472	Cu(+2)-transporting P-type ATPase; required for export of copper from the cytosol into an extracytosolic compartment; has similarity to human proteins involved in Menkes and Wilsons diseases; protein abundance increases in response to DNA replication stress; affects TBSV model (+)RNA virus replication by regulating copper metabolism
Sbay_2.654	1	0.449596	YDR480W	DIG2	2.22422	1	MAP kinase-responsive inhibitor of the Ste12p transcription factor, involved in the regulation of mating-specific genes and the invasive growth pathway; related regulators Dig1p and Dig2p bind to Ste12p
Sbay_7.462	1	0.450816	YGR169C-A		2.2182	1	Putative protein of unknown function; YGR169C-A has a paralog, YJR005C-A, that arose from the whole genome duplication
Sbay_13.218	1	0.450821	YMR049C	ERB1	2.21818	1	Constituent of 66S pre-ribosomal particles, forms a complex with Nop7p and Ytm1p that is required for maturation of the large ribosomal subunit; required for maturation of the 25S and 5.8S ribosomal RNAs; homologous to mammalian Bop1
Sbay_6.117	0.99886	0.450874	NA	NA	2.21792	1	NA
Sbay_8.430	1	0.452142	YOR374W	ALD4	2.21169	1	Mitochondrial aldehyde dehydrogenase, required for growth on ethanol and conversion of acetaldehyde to acetate; phosphorylated; activity is K+ dependent; utilizes NADP+ or NAD+ equally as coenzymes; expression is glucose repressed
Sbay_10.555	1	0.452352	YLR438W	CAR2	2.21067	1.84997	L-ornithine transaminase (OTAse); catalyzes the second step of arginine degradation, expression is dually-regulated by allophanate induction and a specific arginine induction process; not nitrogen catabolite repression sensitive; protein abundance increases in response to DNA replication stress
Sbay_7.15	1	0.452435	YGL246C	RAI1	2.21026	1	Nuclear protein with decapping endonuclease activity targeted toward mRNAs with unmethylated 7-methylguanosine cap structures; binds to and stabilizes the exoribonuclease Rat1p; required for pre-rRNA processing; homologous to human DOM3Z
Sbay_7.532	1	0.453572	YGR240C	PFK1	2.20472	0.746391	Alpha subunit of heterooctameric phosphofructokinase involved in glycolysis, indispensable for anaerobic growth, activated by fructose-2,6-bisphosphate and AMP, mutation inhibits glucose induction of cell cycle-related genes
Sbay_13.181	1	0.454275	YMR014W	BUD22	2.20131	1	Protein required for 18S rRNA maturation and small ribosomal subunit biogenesis; cosediments with pre-ribosomal particles; mutation decreases efficiency of +1 Ty1 frameshifting and transposition, and affects budding pattern
Sbay_2.476	1	0.454768	YDR309C	GIC2	2.19893	1	Redundant rho-like GTPase Cdc42p effector; homolog of Gic1p; involved in initiation of budding and cellular polarization; interacts with Cdc42p via the Cdc42/Rac-interactive binding (CRIB) domain and with PI(4,5)P2 via a polybasic region
Sbay_4.561	0.976758	0.455378	NA	NA	2.19598	0.518245	NA
Sbay_13.291	0.999796	0.45618	YMR112C	MED11	2.19211	1	Subunit of the RNA polymerase II mediator complex; associates with core polymerase subunits to form the RNA polymerase II holoenzyme; essential protein
Sbay_10.359	0.999996	0.457122	YLR262C	YPT6	2.1876	1	Rab family GTPase, Ras-like GTP binding protein involved in the secretory pathway, required for fusion of endosome-derived vesicles with the late Golgi, maturation of the vacuolar carboxypeptidase Y; has similarity to the human GTPase, Rab6
Sbay_7.2	0.999551	0.457424	NA	NA	2.18616	1	NA
Sbay_1.27	1	0.459904	YAL038W	CDC19	2.17437	1	Pyruvate kinase; functions as a homotetramer in glycolysis to convert phosphoenolpyruvate to pyruvate, the input for aerobic (TCA cycle) or anaerobic (glucose fermentation) respiration; regulated via allosteric activation by fructose bisphosphate; CDC19 has a paralog, PYK2, that arose from the whole genome duplication
Sbay_9.155	0.99972	0.461009	YIL045W	PIG2	2.16916	0.675134	Putative type-1 protein phosphatase targeting subunit that tethers Glc7p type-1 protein phosphatase to Gsy2p glycogen synthase
Sbay_5.303	1	0.461109	YER169W	RPH1	2.16869	1	JmjC domain-containing histone demethylase; specifically demethylates H3K36 tri- and dimethyl modification states; associates with actively transcribed (RNA polymerase II) regions in vivo and specifically targets H3K36 in its trimethylation state as its substrate; transcriptional repressor of PHR1; Rph1p phosphorylation during DNA damage is under control of the MEC1-RAD53 pathway; RPH1 has a para…
Sbay_16.76	0.986158	0.461805	YPL230W	USV1	2.16542	0.596336	Putative transcription factor containing a C2H2 zinc finger; mutation affects transcriptional regulation of genes involved in growth on non-fermentable carbon sources, response to salt stress and cell wall biosynthesis; USV1 has a paralog, RGM1, that arose from the whole genome duplication
Sbay_4.159	0.999911	0.462299	Anc_2.381	NA	2.1631	1	NA
Sbay_11.184	0.999998	0.462661	YKL041W	VPS24	2.16141	1	One of four subunits of the endosomal sorting complex required for transport III (ESCRT-III); forms an ESCRT-III subcomplex with Did4p; involved in the sorting of transmembrane proteins into the multivesicular body (MVB) pathway
Sbay_7.180	0.994649	0.463757	YGL089C	MF(ALPHA)2	2.1563	1	Mating pheromone alpha-factor, made by alpha cells; interacts with mating type a cells to induce cell cycle arrest and other responses leading to mating; also encoded by MF(ALPHA)1, which is more highly expressed than MF(ALPHA)2
Sbay_1.41	1	0.464145	YAL025C	MAK16	2.1545	2.27621	Essential nuclear protein, constituent of 66S pre-ribosomal particles; required for maturation of 25S and 5.8S rRNAs; required for maintenance of M1 satellite double-stranded RNA of the L-A virus
Sbay_8.372	0.996065	0.464507	NA	NA	2.15282	1	NA
Sbay_15.341	1	0.465072	YHR143W-A	RPC10	2.1502	1	RNA polymerase subunit ABC10-alpha, found in RNA pol I, II, and III; relocalizes from nucleolus to cytoplasm upon DNA replication stress
Sbay_16.89	1	0.465263	YPL217C	BMS1	2.14932	1	GTPase required for synthesis of 40S ribosomal subunits and for processing the 35S pre-rRNA at sites A0, A1, and A2; interacts with Rcl1p, which stimulates its GTPase and U3 snoRNA binding activities; has similarity to Tsr1p
Sbay_2.706	0.999997	0.465317	YDR524C	AGE1	2.14907	1	ADP-ribosylation factor (ARF) GTPase activating protein (GAP) effector, involved in the secretory and endocytic pathways; contains C2C2H2 cysteine/histidine motif
Sbay_8.370	0.999529	0.465468	YOR319W	HSH49	2.14838	1	U2-snRNP associated splicing factor with similarity to the mammalian splicing factor SAP49; proposed to function as a U2-snRNP assembly factor along with Hsh155p and binding partner Cus1p; contains two RNA recognition motifs (RRM)
Sbay_2.130	1	0.466021	YBR001C	NTH2	2.14583	1	Putative neutral trehalase, required for thermotolerance; may mediate resistance to other cellular stresses; NTH2 has a paralog, NTH1, that arose from the whole genome duplication
Sbay_9.118	1	0.466923	YIL079C	AIR1	2.14168	1	Zinc knuckle protein; involved in nuclear RNA processing and degradation as a component of the TRAMP complex; stimulates the poly(A) polymerase activity of Pap2p in vitro; AIR1 has a paralog, AIR2, that arose from the whole genome duplication
Sbay_5.7	1	0.467669	YEL060C	PRB1	2.13827	1	Vacuolar proteinase B (yscB); serine protease of the subtilisin family; involved in protein degradation in the vacuole and required for full protein degradation during sporulation; activity inhibited by Pbi2p; protein abundance increases in response to DNA replication stress
Sbay_2.150	1	0.467689	YBR021W	FUR4	2.13817	1	Plasma membrane localized uracil permease; expression is tightly regulated by uracil levels and environmental cues; conformational alterations induced by unfolding or substrate binding result in Rsp5p-mediated ubiquitination and degradation
Sbay_4.218	1	0.467701	YDL031W	DBP10	2.13812	1	Putative ATP-dependent RNA helicase of the DEAD-box protein family, constituent of 66S pre-ribosomal particles; essential protein involved in ribosome biogenesis
Sbay_12.48	1	0.468822	YJL033W	HCA4	2.133	1	DEAD box RNA helicase; high-copy number suppression of a U14 snoRNA processing mutant suggests an involvement in 18S rRNA synthesis
Sbay_10.135	1	0.46915	YLR051C	FCF2	2.13151	1	Essential nucleolar protein involved in the early steps of 35S rRNA processing; interacts with Faf1p; member of a transcriptionally co-regulated set of genes called the RRB regulon
Sbay_6.18	1	0.470346	YFL039C	ACT1	2.1261	1	Actin, structural protein involved in cell polarization, endocytosis, and other cytoskeletal functions
Sbay_2.211	1	0.471615	YDR054C	CDC34	2.12038	1	Ubiquitin-conjugating enzyme (E2); catalytic subunit of SCF ubiquitin-protein ligase complex (together with Skp1p, Rbx1p, Cdc53p, and an F-box protein) that regulates cell cycle progression by targeting key substrates for degradation; protein abundance increases in response to DNA replication stress
Sbay_3.61	1	0.47179	YCR028C	FEN2	2.11959	1	Plasma membrane H+-pantothenate symporter; confers sensitivity to the antifungal agent fenpropimorph; relocalizes from vacuole to cytoplasm upon DNA replication stress
Sbay_12.134	0.999981	0.471872	YJR050W	ISY1	2.11922	1	Member of NineTeen Complex (NTC) that contains Prp19p and stabilizes U6 snRNA in catalytic forms of spliceosome containing U2, U5, and U6 snRNAs, interacts with Prp16p to modulate splicing fidelity; isy1 syf2 cells have defective spindles
Sbay_2.91	0.997864	0.47214	YBL029W		2.11802	0.352424	Non-essential protein of unknown function
Sbay_8.127	1	0.472304	YOR078W	BUD21	2.11728	1	Component of small ribosomal subunit (SSU) processosome that contains U3 snoRNA; originally isolated as bud-site selection mutant that displays a random budding pattern
Sbay_7.363	1	0.47232	YGR081C	SLX9	2.11721	1	Protein required for pre-rRNA processing; associated with the 90S pre-ribosome and 43S small ribosomal subunit precursor; interacts with U3 snoRNA; deletion mutant has synthetic fitness defect with an sgs1 deletion mutant
Sbay_7.576	1	0.47284	NA	NA	2.11488	2.39217	NA
Sbay_14.276	1	0.473515	YNL065W	AQR1	2.11187	1	Plasma membrane transporter of the major facilitator superfamily; member of the 12-spanner drug:H(+) antiporter DHA1 family; confers resistance to short-chain monocarboxylic acids and quinidine; involved in the excretion of excess amino acids; AQR1 has a paralog, QDR1, that arose from the whole genome duplication; relocalizes from plasma membrane to cytoplasm upon DNA replication stress
Sbay_14.112	1	0.474168	YNL231C	PDR16	2.10896	1	Phosphatidylinositol transfer protein (PITP); controlled by the multiple drug resistance regulator Pdr1p; localizes to lipid particles and microsomes; controls levels of various lipids, may regulate lipid synthesis; homologous to Pdr17p; protein abundance increases in response to DNA replication stress
Sbay_12.69	1	0.474272	YJL010C	NOP9	2.10849	1	Essential subunit of U3-containing 90S preribosome involved in production of 18S rRNA and assembly of small ribosomal subunit; also part of pre-40S ribosome and required for its export into cytoplasm; binds RNA and contains pumilio domain
Sbay_10.20	1	0.47447	YLL051C	FRE6	2.10762	0.454086	Putative ferric reductase with similarity to Fre2p; expression induced by low iron levels
Sbay_10.508	1	0.475118	YLR390W-A	CCW14	2.10474	1	Covalently linked cell wall glycoprotein, present in the inner layer of the cell wall
Sbay_6.255	1	0.475303	YJL174W	KRE9	2.10392	1	Glycoprotein involved in cell wall beta-glucan assembly; null mutation leads to severe growth defects, aberrant multibudded morphology, and mating defects
Sbay_2.454	0.998824	0.475548	YDR288W	NSE3	2.10284	1	Component of the SMC5-SMC6 complex; this complex plays a key role in the removal of X-shaped DNA structures that arise between sister chromatids during DNA replication and repair; protein abundance increases in response to DNA replication stress
Sbay_13.301	1	0.47863	Anc_2.416	NA	2.0893	1	NA
Sbay_14.78	1	0.479196	YNL264C	PDR17	2.08683	1	Phosphatidylinositol transfer protein (PITP), downregulates Plb1p-mediated turnover of phosphatidylcholine, found in the cytosol and microsomes, homologous to Pdr16p, deletion affects phospholipid composition
Sbay_9.223	1	0.47973	YIR012W	SQT1	2.08451	2.90796	Protein involved in 60S ribosomal subunit assembly or modification; contains multiple WD repeats; interacts with Qsr1p in a two-hybrid assay; protein abundance increases in response to DNA replication stress
Sbay_10.272	1	0.479885	YLR175W	CBF5	2.08383	1	Pseudouridine synthase catalytic subunit of box H/ACA small nucleolar ribonucleoprotein particles (snoRNPs), acts on both large and small rRNAs and on snRNA U2; mutations in human ortholog dyskerin cause the disorder dyskeratosis congenita
Sbay_10.354	1	0.479917	YLR257W		2.08369	1.30066	Protein of unknown function; protein abundance increases in response to DNA replication stress
Sbay_9.102	0.999949	0.480124	YIL096C		2.0828	1	Putative S-adenosylmethionine-dependent methyltransferase; associates with precursors of the 60S ribosomal subunit; predicted to be involved in ribosome biogenesis
Sbay_7.405	1	0.481	YGR121C	MEP1	2.079	1	Ammonium permease; belongs to a ubiquitous family of cytoplasmic membrane proteins that transport only ammonium (NH4+); expression is under the nitrogen catabolite repression regulation
Sbay_11.336	1	0.481204	YKR099W	BAS1	2.07812	1	Myb-related transcription factor involved in regulating basal and induced expression of genes of the purine and histidine biosynthesis pathways; also involved in regulation of meiotic recombination at specific genes
Sbay_9.249	0.999999	0.481261	YIR033W	MGA2	2.07787	1	ER membrane protein involved in regulation of OLE1 transcription, acts with homolog Spt23p; inactive ER form dimerizes and one subunit is then activated by ubiquitin/proteasome-dependent processing followed by nuclear targeting
Sbay_11.179	0.999724	0.482004	YKL047W	ANR2	2.07467	0.535933	Putative protein of unknown function, predicted to be palmitoylated; green fluorescent protein (GFP)-fusion protein localizes to the cytoplasm
Sbay_7.436	1	0.48356	YGR146C	ECL1	2.068	1	Protein of unknown function; mitochondrial-dependent role in the extension of chronological lifespan; overexpression increases oxygen consumption and respiratory activity while deletion results in reduced oxygen consumption under conditions of caloric restriction; induced by iron homeostasis transcription factor Aft2p; multicopy suppressor of temperature sensitive hsf1 mutant; induced by treatmen…
Sbay_13.307	1	0.48375	YMR128W	ECM16	2.06718	1	Essential DEAH-box ATP-dependent RNA helicase specific to the U3 snoRNP, predominantly nucleolar in distribution, required for 18S rRNA synthesis
Sbay_16.427	0.999994	0.483793	YPR101W	SNT309	2.067	1	Member of the NineTeen Complex (NTC) that contains Prp19p and stabilizes U6 snRNA in catalytic forms of the spliceosome containing U2, U5, and U6 snRNAs; interacts physically and genetically with Prp19p
Sbay_7.92	1	0.483943	YGL171W	ROK1	2.06636	1	RNA-dependent ATPase; involved in pre-rRNA processing at sites A0, A1, and A2, and in control of cell cycle progression; contains two upstream open reading frames (uORFs) in 5' untranslated region which regulate translation
Sbay_15.254	1	0.484906	YHR065C	RRP3	2.06225	2.22721	Protein involved in rRNA processing; required for maturation of the 35S primary transcript of pre-rRNA and for cleavage leading to mature 18S rRNA; homologous to eIF-4a, which is a DEAD box RNA-dependent ATPase with helicase activity
Sbay_6.251	1	0.485557	YJL171C		2.05949	0.614032	GPI-anchored cell wall protein of unknown function; induced in response to cell wall damaging agents and by mutations in genes involved in cell wall biogenesis; sequence similarity to YBR162C/TOS1, a covalently bound cell wall protein; protein abundance increases in response to DNA replication stress
Sbay_11.295	0.997978	0.485595	YKR060W	UTP30	2.05933	1	Putative subunit of U3-containing 90S preribosome complex; complex is involved in production of 18S rRNA and assembly of small ribosomal subunit
Sbay_16.438	1	0.485614	YPR110C	RPC40	2.05925	1	RNA polymerase subunit AC40, common to RNA polymerase I and III
Sbay_16.328	1	0.486238	NA	NA	2.05661	1	NA
Sbay_7.224	1	0.486871	YGL050W	TYW3	2.05393	1	tRNA methyltransferase required for synthesis of wybutosine, a modified guanosine found at the 3'-position adjacent to the anticodon of phenylalanine tRNA which supports reading frame maintenance by stabilizing codon-anticodon interactions
Sbay_16.488	1	0.486992	YPR159W	KRE6	2.05342	1	Type II integral membrane protein required for beta-1,6 glucan biosynthesis; putative beta-glucan synthase; localizes to the ER, plasma membrane, sites of polarized growth and secretory vesicles; functionally redundant with Skn1p
Sbay_16.102	1	0.487371	YPL204W	HRR25	2.05182	1	Protein kinase involved in regulating diverse events including vesicular trafficking, DNA repair, and chromosome segregation; binds the CTD of RNA pol II; homolog of mammalian casein kinase 1delta (CK1delta)
Sbay_3.69	1	0.488145	YCR035C	RRP43	2.04857	1	Exosome non-catalytic core component; involved in 3'-5' RNA processing and degradation in both the nucleus and the cytoplasm; has similarity to E. coli RNase PH and to human hRrp43p (OIP2, EXOSC8); protein abundance increases in response to DNA replication stress
Sbay_3.34	1	0.488498	YCR009C	RVS161	2.04709	1	Amphiphysin-like lipid raft protein; interacts with Rvs167p and regulates polarization of the actin cytoskeleton, endocytosis, cell polarity, cell fusion and viability following starvation or osmotic stress
Sbay_13.172	1	0.488606	YMR009W	ADI1	2.04664	1	Acireductone dioxygenease involved in the methionine salvage pathway; ortholog of human MTCBP-1; transcribed as polycistronic mRNA with YMR010W and regulated post-transcriptionally by RNase III (Rnt1p) cleavage; ADI1 mRNA is induced in heat shock conditions
Sbay_2.633	1	0.488741	YDR458C	HEH2	2.04607	1	Inner nuclear membrane (INM) protein; contains helix-extension-helix (HEH) motif, nuclear localization signal sequence; targeting to the INM requires the Srp1p-Kap95p karyopherins and the Ran cycle
Sbay_14.127	1	0.489204	YNL215W	IES2	2.04414	1	Protein that associates with the INO80 chromatin remodeling complex; associates with the INO80 complex under low-salt conditions; essential for growth under anaerobic conditions; protein abundance increases in response to DNA replication stress
Sbay_16.72	1	0.489704	YPL234C	VMA11	2.04205	0.816743	Vacuolar ATPase V0 domain subunit c', involved in proton transport activity; hydrophobic integral membrane protein (proteolipid) containing four transmembrane segments; N and C termini are in the vacuolar lumen
Sbay_14.202	1	0.489762	YNL136W	EAF7	2.04181	1	Subunit of the NuA4 histone acetyltransferase complex, which acetylates the N-terminal tails of histones H4 and H2A
Sbay_5.276	1	0.489978	YER148W	SPT15	2.04091	1	TATA-binding protein, general transcription factor that interacts with other factors to form the preinitiation complex at promoters, essential for viability
Sbay_1.117	0.970038	0.490417	NA	NA	2.03908	1	NA
Sbay_16.271	1	0.490788	YPL043W	NOP4	2.03754	1	Nucleolar protein, essential for processing and maturation of 27S pre-rRNA and large ribosomal subunit biogenesis; constituent of 66S pre-ribosomal particles; contains four RNA recognition motifs (RRMs)
Sbay_2.673	1	0.49095	YDR496C	PUF6	2.03687	1	Pumilio-homology domain protein that binds the 3' UTR of ASH1 mRNA and represses its translation, resulting in proper asymmetric localization of ASH1 mRNA; also co-sediments with the 60S ribosomal subunit and is required for its biogenesis
Sbay_11.74	1	0.49099	YKL152C	GPM1	2.0367	0.766874	Tetrameric phosphoglycerate mutase, mediates the conversion of 3-phosphoglycerate to 2-phosphoglycerate during glycolysis and the reverse reaction during gluconeogenesis
Sbay_16.339	1	0.491136	YPR016C	TIF6	2.0361	1.66626	Constituent of 66S pre-ribosomal particles, has similarity to human translation initiation factor 6 (eIF6); may be involved in the biogenesis and or stability of 60S ribosomal subunits
Sbay_5.195	1	0.49128	YER082C	UTP7	2.0355	1	Nucleolar protein, component of the small subunit (SSU) processome containing the U3 snoRNA that is involved in processing of pre-18S rRNA
Sbay_13.426	1	0.491338	YMR241W	YHM2	2.03526	0.611734	Carrier protein that exports citrate from and imports oxoglutarate into the mitochondrion, causing net export of NADPH reducing equivalents; also associates with mt nucleoids and has a role in replication and segregation of the mt genome
Sbay_16.95	1	0.49199	YPL211W	NIP7	2.03256	3.5329	Nucleolar protein required for 60S ribosome subunit biogenesis, constituent of 66S pre-ribosomal particles; physically interacts with Nop8p and the exosome subunit Rrp43p
Sbay_5.248	1	0.493115	YER127W	LCP5	2.02793	1	Essential protein involved in maturation of 18S rRNA; depletion leads to inhibited pre-rRNA processing and reduced polysome levels; localizes primarily to the nucleolus
Sbay_15.34	1	0.493295	YOL126C	MDH2	2.02718	1	Cytoplasmic malate dehydrogenase, one of three isozymes that catalyze interconversion of malate and oxaloacetate; involved in the glyoxylate cycle and gluconeogenesis during growth on two-carbon compounds; interacts with Pck1p and Fbp1
Sbay_2.49	1	0.493531	YBL068W	PRS4	2.02621	2.21564	5-phospho-ribosyl-1(alpha)-pyrophosphate synthetase, synthesizes PRPP, which is required for nucleotide, histidine, and tryptophan biosynthesis; one of five related enzymes, which are active as heteromultimeric complexes; PRS4 has a paralog, PRS2, that arose from the whole genome duplication
Sbay_13.315	0.999784	0.493732	YMR135C	GID8	2.02539	1	Subunit of GID Complex, binds strongly to central component Vid30p; GID Complex is involved in proteasome-dependent catabolite inactivation of fructose-1,6-bisphosphatase; recruits Rmd5p, Fyv10 and Vid28p to GID Complex; contains LisH, CTLH, and CRA domains that mediate binding to Vid30p (LisH) and Rmd5p and Vid28p (CTLH and CRA); dosage-dependent regulator of START
Sbay_10.142	1	0.493902	YLR058C	SHM2	2.02469	1	Cytosolic serine hydroxymethyltransferase, converts serine to glycine plus 5,10 methylenetetrahydrofolate; major isoform involved in generating precursors for purine, pyrimidine, amino acid, and lipid biosynthesis
Sbay_11.246	0.982193	0.49397	YKR014C	YPT52	2.02441	1	Rab family GTPase, similar to Ypt51p and Ypt53p and to mammalian rab5; required for vacuolar protein sorting and endocytosis; protein abundance increases in response to DNA replication stress
Sbay_7.25	1	0.495917	YGL234W	ADE5,7	2.01646	1	Bifunctional enzyme of the 'de novo' purine nucleotide biosynthetic pathway, contains aminoimidazole ribotide synthetase and glycinamide ribotide synthetase activities
Sbay_5.309	1	0.496201	YER175C	TMT1	2.01531	0.241264	Trans-aconitate methyltransferase, cytosolic enzyme that catalyzes the methyl esterification of 3-isopropylmalate, an intermediate of the leucine biosynthetic pathway, and trans-aconitate, which inhibits the citric acid cycle
Sbay_5.65	1	0.496566	YEL017C-A	PMP2	2.01383	1	Proteolipid associated with plasma membrane H(+)-ATPase (Pma1p); regulates plasma membrane H(+)-ATPase activity; protein abundance increases in response to DNA replication stress; PMP2 has a paralog, PMP1, that arose from the whole genome duplication
Sbay_15.84	0.999488	0.498088	YOL082W	ATG19	2.00768	1	Receptor protein for the cytoplasm-to-vacuole targeting (Cvt) pathway; delivers cargo proteins aminopeptidase I (Ape1p) and alpha-mannosidase (Ams1p) to the phagophore assembly site for packaging into Cvt vesicles
Sbay_4.508	1	0.498119	YBR247C	ENP1	2.00755	1	Protein associated with U3 and U14 snoRNAs, required for pre-rRNA processing and 40S ribosomal subunit synthesis; localized in the nucleus and concentrated in the nucleolus
Sbay_3.123	1	0.498306	YCR087C-A		2.0068	2.15771	Putative protein of unknown function; green fluorescent protein (GFP)-fusion protein localizes to the nucleolus; YCR087C-A is not an essential gene
Sbay_5.194	1	0.498626	YER081W	SER3	2.00551	0.744993	3-phosphoglycerate dehydrogenase; catalyzes the first step in serine and glycine biosynthesis; SER3 has a paralog, SER33, that arose from the whole genome duplication
Sbay_3.55	1	0.499405	YEL017C-A	PMP2	2.00238	1	Proteolipid associated with plasma membrane H(+)-ATPase (Pma1p); regulates plasma membrane H(+)-ATPase activity; protein abundance increases in response to DNA replication stress; PMP2 has a paralog, PMP1, that arose from the whole genome duplication
Sbay_4.40	1	0.499774	YDL208W	NHP2	2.0009	3.03511	Nuclear protein related to mammalian high mobility group (HMG) proteins, essential for function of H/ACA-type snoRNPs, which are involved in 18S rRNA processing
Sbay_2.313	0.997496	0.499861	YDR151C	CTH1	2.00056	1	Member of the CCCH zinc finger family; has similarity to mammalian Tis11 protein, which activates transcription and also has a role in mRNA degradation; may function with Tis11p in iron homeostasis
Sbay_10.98	1	0.500011	YLR018C	POM34	1.99995	1.90978	Subunit of the transmembrane ring of the nuclear pore complex (NPC); contributes to nucleocytoplasmic transport, NPC biogenesis and spindle pole body duplication
Sbay_15.300	1	0.500404	YHR104W	GRE3	1.99839	1	Aldose reductase; involved in methylglyoxal, d-xylose, arabinose, and galactose metabolism; stress induced (osmotic, ionic, oxidative, heat shock, starvation and heavy metals); regulated by the HOG pathway; protein abundance increases in response to DNA replication stress
Sbay_10.100	0.999998	0.500476	YLR020C	YEH2	1.9981	1	Steryl ester hydrolase, catalyzes steryl ester hydrolysis at the plasma membrane; involved in sterol metabolism
Sbay_14.135	1	0.501186	YNL208W		1.99527	1	Protein of unknown function; may interact with ribosomes, based on co-purification experiments; authentic, non-tagged protein is detected in purified mitochondria in high-throughput studies; potential orthologs found in other fungi
Sbay_16.499	1	0.501697	YPR169W	JIP5	1.99323	1	Essential protein required for biogenesis of the large ribosomal subunit; interacts with proteins involved in RNA processing, ribosome biogenesis, ubiquitination and demethylation; similar to WDR55, a human WD repeat protein
Sbay_9.241	0.99408	0.501937	YIR025W	MND2	1.99228	1	Subunit of the anaphase-promoting complex (APC); necessary for maintaining sister chromatid cohesion in prophase I of meiosis by inhibiting premature ubiquitination and subsequent degradation of substrates by the APC(Ama1) ubiquitin ligase
Sbay_15.181	1	0.502609	YOR006C	TSR3	1.98962	1	Protein required for 20S pre-rRNA processing; involved in processing of the 20S pre-rRNA at site D to generate mature 18S rRNA; green fluorescent protein (GFP)-fusion protein localizes to both the cytoplasm and the nucleus; relative distribution to the nucleus increases upon DNA replication stress
Sbay_15.274	1	0.503014	YHR081W	LRP1	1.98802	1	Nuclear exosome-associated nucleic acid binding protein; involved in RNA processing, surveillance, degradation, tethering, and export; homolog of mammalian nuclear matrix protein C1D involved in regulation of DNA repair and recombination
Sbay_11.118	0.999982	0.503205	YKL106W	AAT1	1.98726	1	Mitochondrial aspartate aminotransferase, catalyzes the conversion of oxaloacetate to aspartate in aspartate and asparagine biosynthesis
Sbay_4.450	1	0.503322	YBR196C	PGI1	1.9868	1	Glycolytic enzyme phosphoglucose isomerase, catalyzes the interconversion of glucose-6-phosphate and fructose-6-phosphate; required for cell cycle progression and completion of the gluconeogenic events of sporulation
Sbay_5.93	1	0.503835	YER006W	NUG1	1.98478	1	GTPase that associates with nuclear 60S pre-ribosomes, required for export of 60S ribosomal subunits from the nucleus
Sbay_9.76	1	0.504123	YIL118W	RHO3	1.98364	1	Non-essential small GTPase of the Rho/Rac subfamily of Ras-like proteins involved in the establishment of cell polarity; GTPase activity positively regulated by the GTPase activating protein (GAP) Rgd1p
Sbay_10.315	1	0.504343	YLR221C	RSA3	1.98278	1	Protein with a likely role in ribosomal maturation, required for accumulation of wild-type levels of large (60S) ribosomal subunits; binds to the helicase Dbp6p in pre-60S ribosomal particles in the nucleolus
Sbay_7.99	1	0.504695	YGL163C	RAD54	1.98139	1	DNA-dependent ATPase that stimulates strand exchange; modifies the topology of double-stranded DNA; involved in the recombinational repair of double-strand breaks in DNA during vegetative growth and meiosis; member of the SWI/SNF family; forms nuclear foci upon DNA replication stress
Sbay_14.116	1	0.504725	YNL227C	JJJ1	1.98128	1	Co-chaperone that stimulates the ATPase activity of Ssa1p, required for a late step of ribosome biogenesis; associated with the cytosolic large ribosomal subunit; contains a J-domain; mutation causes defects in fluid-phase endocytosis
Sbay_4.305	0.999988	0.50479	YBR066C	NRG2	1.98102	1	Transcriptional repressor; mediates glucose repression and negatively regulates filamentous growth; NRG2 has a paralog, NRG1, that arose from the whole genome duplication
Sbay_2.195	1	0.505105	YDR037W	KRS1	1.97979	1.60143	Lysyl-tRNA synthetase
Sbay_6.132	0.999637	0.505632	YJL056C	ZAP1	1.97772	1	Zinc-regulated transcription factor; binds to zinc-responsive promoters to induce transcription of certain genes in presence of zinc, represses other genes in low zinc; regulates its own transcription; contains seven zinc-finger domains
Sbay_15.325	1	0.506496	YHR128W	FUR1	1.97435	1	Uracil phosphoribosyltransferase, synthesizes UMP from uracil; involved in the pyrimidine salvage pathway
Sbay_10.497	1	0.507412	YLR380W	CSR1	1.97078	1	Phosphatidylinositol transfer protein; has a potential role in regulating lipid and fatty acid metabolism under heme-depleted conditions; interacts specifically with thioredoxin peroxidase; may have a role in oxidative stress resistance; protein abundance increases in response to DNA replication stress
Sbay_10.285	0.998785	0.50764	YLR189C	ATG26	1.9699	1	UDP-glucose:sterol glucosyltransferase, conserved enzyme involved in synthesis of sterol glucoside membrane lipids; in contrast to ATG26 from P. pastoris, S. cerevisiae ATG26 is not involved in autophagy
Sbay_15.11	1	0.508019	YOL149W	DCP1	1.96843	1	Subunit of the Dcp1p-Dcp2p decapping enzyme complex; decapping complex removes the 5' cap structure from mRNAs prior to their degradation; enhances the activity of catalytic subunit Dcp2p; regulated by DEAD box protein Dhh1p; forms cytoplasmic foci upon DNA replication stress
Sbay_16.464	1	0.508416	YPR137W	RRP9	1.96689	1	Protein involved in pre-rRNA processing, associated with U3 snRNP; component of small ribosomal subunit (SSU) processosome; ortholog of the human U3-55k protein
Sbay_15.132	1	0.508479	YOL036W		1.96665	1	Protein of unknown function; potential Cdc28p substrate; YOL036W has a paralog, YIR016W, that arose from the whole genome duplication
Sbay_15.278	1	0.508481	YHR084W	STE12	1.96664	1	Transcription factor that is activated by a MAP kinase signaling cascade, activates genes involved in mating or pseudohyphal/invasive growth pathways; cooperates with Tec1p transcription factor to regulate genes specific for invasive growth
Sbay_11.48	0.990936	0.508486	YKL175W	ZRT3	1.96662	1	Vacuolar membrane zinc transporter, transports zinc from storage in the vacuole to the cytoplasm when needed; transcription is induced under conditions of zinc deficiency
Sbay_4.268	1	0.509114	YBR036C	CSG2	1.9642	1	Endoplasmic reticulum membrane protein, required for mannosylation of inositolphosphorylceramide and for growth at high calcium concentrations; protein abundance increases in response to DNA replication stress
Sbay_16.277	0.967499	0.509559	YPL039W		1.96248	1	Putative protein of unknown function; YPL039W is not an essential gene
Sbay_11.317	1	0.509595	YKR081C	RPF2	1.96234	3.50798	Essential protein involved in the processing of pre-rRNA and the assembly of the 60S ribosomal subunit; interacts with ribosomal protein L11; localizes predominantly to the nucleolus; constituent of 66S pre-ribosomal particles
Sbay_11.166	1	0.510143	YKL060C	FBA1	1.96024	0.751898	Fructose 1,6-bisphosphate aldolase, required for glycolysis and gluconeogenesis; catalyzes conversion of fructose 1,6 bisphosphate to glyceraldehyde-3-P and dihydroxyacetone-P; locates to mitochondrial outer surface upon oxidative stress
Sbay_3.159	1	0.510524	YCL054W	SPB1	1.95877	1	AdoMet-dependent methyltransferase involved in rRNA processing and 60S ribosomal subunit maturation; methylates G2922 in the tRNA docking site of the large subunit rRNA and in the absence of snR52, U2921; suppressor of PAB1 mutants
Sbay_15.249	0.996754	0.51067	YHR060W	VMA22	1.95821	1	Peripheral membrane protein that is required for vacuolar H+-ATPase (V-ATPase) function, although not an actual component of the V-ATPase complex; functions in the assembly of the V-ATPase; localized to the yeast endoplasmic reticulum (ER)
Sbay_8.296	1	0.511014	YOR246C	ENV9	1.95689	1.59804	Protein proposed to be involved in vacuolar functions; mutant shows defect in CPY processing and defects in vacuolar morphology; has similarity to oxidoreductases, found in lipid particles; required for replication of Brome mosaic virus in S. cerevisiae, a model system for studying replication of positive-strand RNA viruses in their natural hosts
Sbay_7.254	1	0.511014	YGL026C	TRP5	1.95689	1	Tryptophan synthase, catalyzes the last step of tryptophan biosynthesis; regulated by the general control system of amino acid biosynthesis
Sbay_14.408	1	0.511065	YNR053C	NOG2	1.9567	1.63457	Putative GTPase that associates with pre-60S ribosomal subunits in the nucleolus and is required for their nuclear export and maturation
Sbay_5.157	1	0.511327	YER052C	HOM3	1.9557	1	Aspartate kinase (L-aspartate 4-P-transferase); cytoplasmic enzyme that catalyzes the first step in the common pathway for methionine and threonine biosynthesis; expression regulated by Gcn4p and the general control of amino acid synthesis
Sbay_4.550	1	0.51164	YBR290W	BSD2	1.9545	1	Heavy metal ion homeostasis protein, facilitates trafficking of Smf1p and Smf2p metal transporters to the vacuole where they are degraded, controls metal ion transport, prevents metal hyperaccumulation, functions in copper detoxification
Sbay_7.104	1	0.511693	YGL159W		1.9543	1	Putative protein of unknown function; deletion mutant has no detectable phenotype
Sbay_15.16	1	0.511805	YOL144W	NOP8	1.95387	1	Nucleolar protein required for 60S ribosomal subunit biogenesis
Sbay_9.148	1	0.512332	YIL051C	MMF1	1.95186	2.08796	Mitochondrial protein required for transamination of isoleucine but not of valine or leucine; may regulate specificity of branched-chain transaminases Bat1p and Bat2p; interacts genetically with mitochondrial ribosomal protein genes
Sbay_8.105	1	0.513348	YOR056C	NOB1	1.948	1	Protein involved in proteasomal and 40S ribosomal subunit biogenesis; required for cleavage of the 20S pre-rRNA to generate the mature 18S rRNA; cleavage is activated by Fun12p, a GTPase and translation initiation factor; relocalizes from nucleus to nucleolus upon DNA replication stress
Sbay_8.210	0.999999	0.513574	YOR159C	SME1	1.94714	1	Core Sm protein Sm E; part of heteroheptameric complex (with Smb1p, Smd1p, Smd2p, Smd3p, Smx3p, and Smx2p) that is part of the spliceosomal U1, U2, U4, and U5 snRNPs; homolog of human Sm E
Sbay_12.242	0.998866	0.51393	YJR148W	BAT2	1.94579	1	Cytosolic branched-chain amino acid (BCAA) aminotransferase, preferentially involved in BCAA catabolism; homolog of murine ECA39; highly expressed during stationary phase and repressed during logarithmic phase
Sbay_12.137	0.999997	0.513998	YJR052W	RAD7	1.94553	1	Protein that recognizes and binds damaged DNA in an ATP-dependent manner (with Rad16p) during nucleotide excision repair; subunit of Nucleotide Excision Repair Factor 4 (NEF4) and the Elongin-Cullin-Socs (ECS) ligase complex
Sbay_8.263	1	0.514485	YOR210W	RPB10	1.94369	1	RNA polymerase subunit ABC10-beta, common to RNA polymerases I, II, and III
Sbay_15.157	1	0.514537	YOL014W		1.94349	3.33239	Putative protein of unknown function
Sbay_15.361	1	0.514855	YHR162W	MPC2	1.94229	1	Highly conserved subunit of the mitochondrial pyruvate carrier; a mitochondrial inner membrane complex comprised of Fmp37p/Mpc1p and either Mpc2p or Fmp43p/Mpc3p mediates mitochondrial pyruvate uptake; more highly expressed in glucose-containing minimal medium than in lactate-containing medium
Sbay_4.530	0.999973	0.514999	YBR269C	FMP21	1.94175	1	Putative protein of unknown function; the authentic, non-tagged protein is detected in highly purified mitochondria in high-throughput studies
Sbay_2.709	1	0.517425	YDR527W	RBA50	1.93265	1	Protein involved in transcription; interacts with RNA polymerase II subunits Rpb2p, Rpb3, and Rpb11p; has similarity to human RPAP1
Sbay_15.375	0.990101	0.51838	YHR175W	CTR2	1.92909	1	Putative low-affinity copper transporter of the vacuolar membrane; mutation confers resistance to toxic copper concentrations, while overexpression confers resistance to copper starvation
Sbay_6.34	1	0.518528	YFL024C	EPL1	1.92854	1	Subunit of NuA4, an essential histone H4/H2A acetyltransferase complex; conserved region at N-terminus is essential for interaction with the NPC (nucleosome core particle); required for autophagy; homologous to Drosophila Enhancer of Polycomb
Sbay_5.234	1	0.518917	YER113C	TMN3	1.92709	1	Protein with a role in cellular adhesion and filamentous growth; similar to Emp70p and Tmn2p; member of Transmembrane Nine family with 9 transmembrane segments; localizes to Golgi; induced by 8-methoxypsoralen plus UVA irradiation
Sbay_14.20	0.99993	0.521022	YNL320W		1.9193	1	Putative protein of unknown function; the authentic, non-tagged protein is detected in highly purified mitochondria in high-throughput studies
Sbay_5.43	1	0.521895	YEL026W	SNU13	1.91609	1	RNA binding protein, part of U3 snoRNP involved in rRNA processing, part of U4/U6-U5 tri-snRNP involved in mRNA splicing, similar to human 15.5K protein
Sbay_6.66	0.999967	0.5226	YFR003C	YPI1	1.91351	1	Regulatory subunit of the type I protein phosphatase (PP1) Glc7p; Glc7p participates in the regulation of a variety of metabolic processes including mitosis and glycogen metabolism; in vitro evidence suggests Ypi1p is an inhibitor of Glc7p while in vivo evidence suggests it is an activator; overproduction causes decreased cellular content of glycogen; partial depletion causes lithium sensitivity,…
Sbay_3.153	1	0.522825	YCL059C	KRR1	1.91269	3.31053	Essential nucleolar protein required for the synthesis of 18S rRNA and for the assembly of 40S ribosomal subunit
Sbay_11.278	1	0.522943	YKR043C	SHB17	1.91225	1	Sedoheptulose bisphosphatase involved in riboneogenesis; dephosphorylates sedoheptulose 1,7-bisphosphate, which is converted via the nonoxidative pentose phosphate pathway to ribose-5-phosphate; facilitates the conversion of glycolytic intermediates to pentose phosphate units; also has fructose 1,6-bisphosphatase activity but this is probably not biologically relevant, since deletion does not aff…
Sbay_4.392	1	0.523484	YBR142W	MAK5	1.91028	1	Essential nucleolar protein, putative DEAD-box RNA helicase required for maintenance of M1 dsRNA virus; involved in biogenesis of large (60S) ribosomal subunits
Sbay_8.172	1	0.524487	NA	NA	1.90663	1	NA
Sbay_7.466	1	0.526154	YGR173W	RBG2	1.90058	1	Protein with a role in translation; forms a complex with Gir2p; has similarity to mammalian developmentally regulated GTP-binding protein
Sbay_6.35	1	0.526416	YFL023W	BUD27	1.89964	1.70532	Unconventional prefoldin protein involved in translation initiation; mutants have inappropriate expression of nutrient sensitive genes due to translational derepression of Gcn4p transcription factor; diploid mutants show random budding
Sbay_7.450	1	0.526698	YGR159C	NSR1	1.89862	3.61494	Nucleolar protein that binds nuclear localization sequences, required for pre-rRNA processing and ribosome biogenesis
Sbay_16.389	1	0.527469	YPR062W	FCY1	1.89585	1	Cytosine deaminase, zinc metalloenzyme that catalyzes the hydrolytic deamination of cytosine to uracil; of biomedical interest because it also catalyzes the deamination of 5-fluorocytosine (5FC) to form anticancer drug 5-fluorouracil (5FU)
Sbay_15.319	0.981555	0.527536	YHR122W	CIA2	1.89561	1	Component of cytosolic iron-sulfur protein assembly (CIA) machinery; acts at a late step of Fe-S cluster assembly; forms the CIA targeting complex with Cia1p and Met18p that directs Fe-S cluster incorporation into a subset of proteins involved in methionine biosynthesis, DNA replication and repair, transcription, and telomere maintenance; ortholog of human FAM96B
Sbay_14.266	1	0.528372	YNL074C	MLF3	1.8926	1	Serine-rich protein of unknown function, predicted to be palmitoylated; overproduction suppresses the growth inhibition caused by exposure to the immunosuppressant leflunomide
Sbay_3.182	1	0.528811	NA	NA	1.89103	1	NA
Sbay_14.87	1	0.528823	YNL255C	GIS2	1.89099	1	Translational activator for mRNAs with internal ribosome entry sites; associates with polysomes and binds to a specific subset of mRNAs; localizes to RNA processing bodies (P bodies) and to stress granules; may have a role in translation regulation under stress conditions; ortholog of human ZNF9/CNBP, a gene involved in myotonic dystrophy type 2
Sbay_15.369	1	0.52917	YHR169W	DBP8	1.88975	1	ATPase, putative RNA helicase of the DEAD-box family; component of 90S preribosome complex involved in production of 18S rRNA and assembly of 40S small ribosomal subunit; ATPase activity stimulated by association with Esf2p
Sbay_7.449	0.999262	0.529368	YGR158C	MTR3	1.88904	1	Exosome non-catalytic core component; involved in 3'-5' RNA processing and degradation in both the nucleus and the cytoplasm; has similarity to E. coli RNase PH and to human hMtr3p (EXOSC6)
Sbay_2.400	1	0.529514	YDR234W	LYS4	1.88852	1	Homoaconitase, catalyzes the conversion of homocitrate to homoisocitrate, which is a step in the lysine biosynthesis pathway
Sbay_4.411	0.999927	0.529635	YBR160W	CDC28	1.88809	1	Catalytic subunit of the main cell cycle cyclin-dependent kinase (CDK); alternately associates with G1 cyclins (CLNs) and G2/M cyclins (CLBs) which direct the CDK to specific substrates; involved in modulating membrane trafficking dynamics; protein abundance increases in response to DNA replication stress
Sbay_8.390	1	0.530841	YOR340C	RPA43	1.8838	1	RNA polymerase I subunit A43
Sbay_5.73	1	0.530936	YEL009C	GCN4	1.88347	1	Basic leucine zipper (bZIP) transcriptional activator of amino acid biosynthetic genes in response to amino acid starvation; expression is tightly regulated at both the transcriptional and translational levels
Sbay_13.78	1	0.531063	YML074C	FPR3	1.88301	1.83693	Nucleolar peptidyl-prolyl cis-trans isomerase (PPIase); FK506 binding protein; phosphorylated by casein kinase II (Cka1p-Cka2p-Ckb1p-Ckb2p) and dephosphorylated by Ptp1p
Sbay_16.150	1	0.531263	YPL160W	CDC60	1.88231	1	Cytosolic leucyl tRNA synthetase, ligates leucine to the appropriate tRNA
Sbay_9.78	1	0.531798	YIL116W	HIS5	1.88041	1	Histidinol-phosphate aminotransferase, catalyzes the seventh step in histidine biosynthesis; responsive to general control of amino acid biosynthesis; mutations cause histidine auxotrophy and sensitivity to Cu, Co, and Ni salts
Sbay_4.125	1	0.532	YDL122W	UBP1	1.8797	1	Ubiquitin-specific protease that removes ubiquitin from ubiquitinated proteins; cleaves at the C terminus of ubiquitin fusions irrespective of their size; capable of cleaving polyubiquitin chains
Sbay_15.243	1	0.532858	YHR052W	CIC1	1.87667	1	Essential protein that interacts with proteasome components and has a potential role in proteasome substrate specificity; also copurifies with 66S pre-ribosomal particles
Sbay_6.185	1	0.533182	YJL110C	GZF3	1.87553	1	GATA zinc finger protein; negatively regulates nitrogen catabolic gene expression by competing with Gat1p for GATA site binding; function requires a repressive carbon source; dimerizes with Dal80p and binds to Tor1p; GZF3 has a paralog, DAL80, that arose from the whole genome duplication
Sbay_8.361	1	0.533437	YOR310C	NOP58	1.87464	1	Protein involved in pre-rRNA processing, 18S rRNA synthesis, and snoRNA synthesis; component of the small subunit processome complex, which is required for processing of pre-18S rRNA
Sbay_3.158	0.988633	0.533438	YCL055W	KAR4	1.87463	1	Transcription factor required for gene regulation in response to pheromones; also required during meiosis; exists in two forms, a slower-migrating form more abundant during vegetative growth and a faster-migrating form induced by pheromone
Sbay_13.55	1	0.534206	YML093W	UTP14	1.87194	2.40263	Subunit of U3-containing Small Subunit (SSU) processome complex involved in production of 18S rRNA and assembly of small ribosomal subunit
Sbay_8.180	0.999825	0.535224	YOR128C	ADE2	1.86838	1	Phosphoribosylaminoimidazole carboxylase, catalyzes a step in the 'de novo' purine nucleotide biosynthetic pathway; red pigment accumulates in mutant cells deprived of adenine
Sbay_16.420	0.998766	0.535303	YPR093C	ASR1	1.8681	1	Ubiquitin ligase that modifies and regulates RNA Pol II; involved in a putative alcohol-responsive signaling pathway; accumulates in the nucleus under alcohol stress; contains a Ring/PHD finger domain similar to the mammalian rA9 protein
Sbay_4.260	1	0.535493	YDR006C	SOK1	1.86744	1	Protein whose overexpression suppresses the growth defect of mutants lacking protein kinase A activity; involved in cAMP-mediated signaling; localized to the nucleus; similar to the mouse testis-specific protein PBS13
Sbay_8.431	1	0.535849	YOR375C	GDH1	1.8662	0.636844	NADP(+)-dependent glutamate dehydrogenase; synthesizes glutamate from ammonia and alpha-ketoglutarate; rate of alpha-ketoglutarate utilization differs from Gdh3p; expression regulated by nitrogen and carbon sources; GDH1 has a paralog, GDH3, that arose from the whole genome duplication
Sbay_5.98	0.961075	0.536094	YER010C		1.86535	1	Protein of unknown function, forms a ring-shaped homotrimer; has similarity to members of the prokaryotic rraA family; possibly involved in a phosphotransfer reaction
Sbay_16.309	1	0.536197	YPL009C	TAE2	1.86498	1	Protein of unknown function, involved in protein translation; may interact with ribosomes, based on co-purification experiments; green fluorescent protein (GFP)-fusion protein localizes to the cytoplasm
Sbay_12.192	1	0.537054	YJR103W	URA8	1.86201	1	Minor CTP synthase isozyme (see also URA7); catalyzes the ATP-dependent transfer of the amide nitrogen from glutamine to UTP, forming CTP, the final step in de novo biosynthesis of pyrimidines; involved in phospholipid biosynthesis; capable of forming cytoplasmic filaments termed cytoophidium, especially during conditions of glucose depletion; URA8 has a paralog, URA7, that arose from the whole g…
Sbay_10.183	1	0.537289	YLR099C	ICT1	1.86119	1	Lysophosphatidic acid acyltransferase; responsible for enhanced phospholipid synthesis during organic solvent stress; null displays increased sensitivity to Calcofluor white; highly expressed during organic solvent stress; ICT1 has a paralog, ECM18, that arose from the whole genome duplication
Sbay_2.568	1	0.537422	YDR391C		1.86074	1	Putative protein of unknown function, possibly involved in zinc homeostasis; Bdf1p-dependent transcription induced by salt stress; green fluorescent protein (GFP)-fusion protein localizes to both the cytoplasm and the nucleus
Sbay_10.64	1	0.538144	YLL011W	SOF1	1.85824	1	Essential protein required for biogenesis of 40S (small) ribosomal subunit; has similarity to the beta subunit of trimeric G-proteins and the splicing factor Prp4p
Sbay_14.215	1	0.538409	YNL125C	ESBP6	1.85733	1	Protein with similarity to monocarboxylate permeases, appears not to be involved in transport of monocarboxylates such as lactate, pyruvate or acetate across the plasma membrane
Sbay_15.216	1	0.538864	YHR030C	SLT2	1.85576	1	Serine/threonine MAP kinase; involved in regulating maintenance of cell wall integrity, progression through the cell cycle, and nuclear mRNA retention in heat shock; required for mitophagy and pexophagy; affects recruitment of mitochondria to the phagophore assembly site (PAS); regulated by the PKC1-mediated signaling pathway
Sbay_14.166	1	0.538923	YNL175C	NOP13	1.85555	3.22372	Nucleolar protein found in preribosomal complexes; contains an RNA recognition motif (RRM); relative distribution to the nucleolus increases upon DNA replication stress
Sbay_5.104	0.965591	0.538972	YER014W	HEM14	1.85538	1	Protoporphyrinogen oxidase, a mitochondrial enzyme that catalyzes the seventh step in the heme biosynthetic pathway, converting protoporphyrinogen IX to protoporphyrin IX; inhibited by diphenyl ether-type herbicides
Sbay_11.61	0.999094	0.539012	NA	NA	1.85525	1	NA
Sbay_16.219	1	0.539294	YPL093W	NOG1	1.85428	2.97892	Putative GTPase that associates with free 60S ribosomal subunits in the nucleolus and is required for 60S ribosomal subunit biogenesis; constituent of 66S pre-ribosomal particles; member of the ODN family of nucleolar G-proteins
Sbay_10.316	1	0.541414	YLR222C	UTP13	1.84701	1	Nucleolar protein, component of the small subunit (SSU) processome containing the U3 snoRNA that is involved in processing of pre-18S rRNA
Sbay_10.283	1	0.54144	YLR187W	SKG3	1.84693	1	Protein of unknown function; green fluorescent protein (GFP)-fusion protein localizes to the cell periphery, cytoplasm, bud, and bud neck; potential Cdc28p substrate; similar to Skg4p; relocalizes from bud neck to cytoplasm upon DNA replication stress; SKG3 has a paralog, CAF120, that arose from the whole genome duplication
Sbay_2.53	0.999978	0.543133	YBL064C	PRX1	1.84117	1	Mitochondrial peroxiredoxin with thioredoxin peroxidase activity; has a role in reduction of hydroperoxides; reactivation requires Trr2p and glutathione; induced during respiratory growth and oxidative stress; phosphorylated; protein abundance increases in response to DNA replication stress
Sbay_2.516	1	0.543385	NA	NA	1.84031	0.580811	NA
Sbay_10.163	0.996148	0.544804	YLR080W	EMP46	1.83552	0.555608	Integral membrane component of endoplasmic reticulum-derived COPII-coated vesicles, which function in ER to Golgi transport
Sbay_2.465	1	0.545341	YDR299W	BFR2	1.83371	1	Essential protein that is a component of 90S preribosomes; may be involved in rRNA processing; multicopy suppressor of sensitivity to Brefeldin A; expression is induced during lag phase and also by cold shock
Sbay_8.250	1	0.545773	YOR194C	TOA1	1.83226	1	TFIIA large subunit; involved in transcriptional activation, acts as antirepressor or as coactivator; homologous to largest and second largest subunits of human and Drosophila TFIIA
Sbay_8.359	0.999002	0.545851	YOR307C	SLY41	1.832	1	Protein involved in ER-to-Golgi transport
Sbay_10.553	0.999995	0.546745	YLR437C	DIF1	1.82901	1	Protein that regulates the nuclear localization of ribonucleotide reductase Rnr2p and Rnr4p subunits; phosphorylated by Dun1p in response to DNA damage and degraded; N-terminal half has similarity to S. pombe Spd1 protein
Sbay_11.100	0.999966	0.547028	YKL125W	RRN3	1.82806	1	Protein required for transcription of rDNA by RNA polymerase I; transcription factor independent of DNA template; involved in recruitment of RNA polymerase I to rDNA; structure reveals unique HEAT repeat fold and a surface serine patch; phosphorylation of serine patch impairs cell growth and reduces RNA polymerase I binding in vitro and RNA polymerase I recruitment to the rDNA gene in vivo
Sbay_14.405	1	0.547748	YNR050C	LYS9	1.82566	0.296255	Saccharopine dehydrogenase (NADP+, L-glutamate-forming); catalyzes the formation of saccharopine from alpha-aminoadipate 6-semialdehyde, the seventh step in lysine biosynthesis pathway; exhibits genetic and physical interactions with TRM112
Sbay_2.659	1	0.549303	YDR485C	VPS72	1.82049	1	Htz1p-binding component of the SWR1 complex, which exchanges histone variant H2AZ (Htz1p) for chromatin-bound histone H2A; required for vacuolar protein sorting
Sbay_11.256	1	0.55007	YKR024C	DBP7	1.81795	1.66272	Putative ATP-dependent RNA helicase of the DEAD-box family involved in ribosomal biogenesis; essential for growth under anaerobic conditions
Sbay_8.259	1	0.551143	YOR206W	NOC2	1.81441	1	Protein that forms a nucleolar complex with Mak21p that binds to 90S and 66S pre-ribosomes, as well as a nuclear complex with Noc3p that binds to 66S pre-ribosomes; both complexes mediate intranuclear transport of ribosomal precursors
Sbay_16.416	1	0.551617	YPR086W	SUA7	1.81285	1	Transcription factor TFIIB, a general transcription factor required for transcription initiation and start site selection by RNA polymerase II
Sbay_15.279	0.999982	0.551881	YHR085W	IPI1	1.81199	1	Component of the Rix1 complex (Rix1p-Ipi1p-Ipi3p) and possibly pre-replicative complexes (pre-RCs); required for processing of ITS2 sequences from 35S pre-rRNA; component of the pre-60S ribosomal particle with the dynein-related AAA-type ATPase Mdn1p; required for pre-RC formation and maintenance during DNA replication licensing; IPI1 is an essential gene
Sbay_9.34	1	0.552252	YIL154C	IMP2'	1.81077	1	Transcriptional activator involved in maintenance of ion homeostasis and protection against DNA damage caused by bleomycin and other oxidants, contains a C-terminal leucine-rich repeat
Sbay_13.460	1	0.552345	YMR272C	SCS7	1.81046	0.482986	Sphingolipid alpha-hydroxylase, functions in the alpha-hydroxylation of sphingolipid-associated very long chain fatty acids, has both cytochrome b5-like and hydroxylase/desaturase domains, not essential for growth
Sbay_15.85	0.99994	0.552619	YOL081W	IRA2	1.80956	1	GTPase-activating protein; negatively regulates RAS by converting it from the GTP- to the GDP-bound inactive form, required for reducing cAMP levels under nutrient limiting conditions; similar to human neurofibromin; IRA2 has a paralog, IRA1, that arose from the whole genome duplication
Sbay_2.324	1	0.552839	YDR161W		1.80885	1	Putative protein of unknown function; non-essential gene; proposed function in rRNA and ribosome biosynthesis based on transcriptional co-regulation; genetic interactions suggest a role in ER-associated protein degradation (ERAD)
Sbay_8.39	0.998132	0.552862	YHL013C	OTU2	1.80877	1	Protein of unknown function; may interact with ribosomes, based on co-purification experiments; member of the ovarian tumor-like (OTU) superfamily of predicted cysteine proteases; shows cytoplasmic localization; protein abundance increases in response to DNA replication stress
Sbay_12.93	1	0.553098	YJR009C	TDH2	1.808	1	Glyceraldehyde-3-phosphate dehydrogenase, isozyme 2; involved in glycolysis and gluconeogenesis; tetramer that catalyzes the reaction of glyceraldehyde-3-phosphate to 1,3 bis-phosphoglycerate; detected in the cytoplasm and cell wall; protein abundance increases in response to DNA replication stress; TDH2 has a paralog, TDH3, that arose from the whole genome duplication
Sbay_15.227	1	0.55411	YHR039C-A	VMA10	1.80469	1	Subunit G of the eight-subunit V1 peripheral membrane domain of the vacuolar H+-ATPase (V-ATPase), an electrogenic proton pump found throughout the endomembrane system; involved in vacuolar acidification
Sbay_11.224	0.999945	0.555292	YKL005C	BYE1	1.80086	1	Negative regulator of transcription elongation, contains a TFIIS-like domain and a PHD finger, multicopy suppressor of temperature-sensitive ess1 mutations, probably binds RNA polymerase II large subunit
Sbay_7.43	0.999967	0.555327	YGL219C	MDM34	1.80074	1	Mitochondrial component of the ERMES complex that links the ER to mitochondria and may promote inter-organellar calcium and phospholipid exchange as well as coordinating mitochondrial DNA replication and growth
Sbay_8.333	0.983065	0.555692	YOR285W	RDL1	1.79956	1	Protein of unknown function containing a rhodanese-like domain; localized to the mitochondrial outer membrane; protein abundance increases in response to DNA replication stress
Sbay_9.136	1	0.557198	YIL065C	FIS1	1.7947	1	Protein involved in mitochondrial membrane fission and peroxisome abundance; required for localization of Dnm1p and Mdv1p during mitochondrial division; mediates ethanol-induced apoptosis and ethanol-induced mitochondrial fragmentation
Sbay_8.426	1	0.557763	YOR370C	MRS6	1.79287	1	Rab escort protein; forms a complex with the Ras-like small GTPase Ypt1p that is required for the prenylation of Ypt1p by protein geranylgeranyltransferase type II (Bet2p-Bet4p); sequence similarity to mammalian choroideraemia gene; relative distribution to the nucleus increases upon DNA replication stress
Sbay_10.350	0.997145	0.558104	YLR254C	NDL1	1.79178	1	Homolog of nuclear distribution factor NudE, NUDEL; interacts with Pac1p and regulates dynein targeting to microtubule plus ends
Sbay_5.299	1	0.558626	YER165W	PAB1	1.79011	1	Poly(A) binding protein, part of the 3'-end RNA-processing complex, mediates interactions between the 5' cap structure and the 3' mRNA poly(A) tail, involved in control of poly(A) tail length, interacts with translation factor eIF-4G
Sbay_2.234	0.997674	0.559903	YDR075W	PPH3	1.78602	1	Catalytic subunit of protein phosphatase PP4 complex; active complex is composed of Pph3p and Psy2p, with Psy4p apparently providing additional substrate specificity in some cases; regulates recovery from the DNA damage checkpoint and also the gene conversion- and single-strand annealing-mediated pathways of meiotic double-strand break repair; involved in activation of Gln3p to alleviate nitrogen…
Sbay_5.313	1	0.559973	YER177W	BMH1	1.7858	1	14-3-3 protein, major isoform; controls proteome at post-transcriptional level, binds proteins and DNA, involved in regulation of many processes including exocytosis, vesicle transport, Ras/MAPK signaling, and rapamycin-sensitive signaling; protein increases in abundance and relative distribution to the nucleus increases upon DNA replication stress
Sbay_14.94	1	0.560263	YNL248C	RPA49	1.78487	2.55296	RNA polymerase I subunit A49
Sbay_9.165	1	0.56104	YIL035C	CKA1	1.78241	1	Alpha catalytic subunit of casein kinase 2 (CK2), a Ser/Thr protein kinase with roles in cell growth and proliferation; CK2, comprised of CKA1, CKA2, CKB1 and CKB2, has many substrates including transcription factors and all RNA polymerases; regulates Fkh1p-mediated donor preference during mating-type switching
Sbay_2.152	1	0.561462	YBR023C	CHS3	1.78106	1	Chitin synthase III, catalyzes the transfer of N-acetylglucosamine (GlcNAc) to chitin; required for synthesis of the majority of cell wall chitin, the chitin ring during bud emergence, and spore wall chitosan
Sbay_14.75	1	0.561487	YNL268W	LYP1	1.78099	1.51253	Lysine permease; one of three amino acid permeases (Alp1p, Can1p, Lyp1p) responsible for uptake of cationic amino acids
Sbay_14.277	1	0.561542	YNL064C	YDJ1	1.78081	1.57499	Type I HSP40 co-chaperone; involved in regulation of HSP90 and HSP70 functions; critical for determining cell size at Start as a function of growth rate; involved in protein translocation across membranes; member of the DnaJ family
Sbay_10.199	1	0.56182	YLR109W	AHP1	1.77993	1	Thiol-specific peroxiredoxin, reduces hydroperoxides to protect against oxidative damage; function in vivo requires covalent conjugation to Urm1p
Sbay_16.232	1	0.562196	YPL081W	RPS9A	1.77874	2.66763	Protein component of the small (40S) ribosomal subunit; homologous to mammalian ribosomal protein S9 and bacterial S4; RPS9A has a paralog, RPS9B, that arose from the whole genome duplication
Sbay_2.589	1	0.562248	YDR412W	RRP17	1.77857	2.17081	Component of the pre-60S pre-ribosomal particle; required for cell viability under standard (aerobic) conditions but not under anaerobic conditions; exonuclease required for 5&#8242; end processing of pre-60S ribosomal RNA
Sbay_2.48	1	0.562458	YBL069W	AST1	1.77791	1	Lipid raft associated protein; interacts with the plasma membrane ATPase Pma1p and has a role in its targeting to the plasma membrane by influencing its incorporation into lipid rafts; sometimes classified in the medium-chain dehydrogenase/reductases (MDRs) superfamily; AST1 has a paralog, AST2, that arose from the whole genome duplication
Sbay_13.206	1	0.562803	YMR037C	MSN2	1.77682	1	Transcriptional activator; activated in stress conditions, which results in translocation from the cytoplasm to the nucleus; binds DNA at stress response elements of responsive genes, inducing gene expression; MSN2 has a paralog, MSN4, that arose from the whole genome duplication; relative distribution to the nucleus increases upon DNA replication stress
Sbay_4.187	1	0.562946	YDL063C	SYO1	1.77637	1	Transport adaptor or symportin; facilitates synchronized nuclear coimport of the two 5S-rRNA binding proteins Rpl5p and Rpl11p; required for biogenesis of the large ribosomal subunit; green fluorescent protein (GFP)-fusion protein localizes to the cytoplasm and nucleus
Sbay_7.50	1	0.56478	YGL211W	NCS6	1.7706	1	Protein required for thiolation of the uridine at the wobble position of Gln, Lys, and Glu tRNAs; has a role in urmylation and in invasive and pseudohyphal growth; inhibits replication of Brome mosaic virus in S. cerevisiae
Sbay_13.11	1	0.564927	YML130C	ERO1	1.77014	1	Thiol oxidase required for oxidative protein folding in the ER; essential for maintaining proper redox balance in ER; feedback regulation of Ero1p occurs via reduction and oxidation of Ero1p regulatory bonds; reduced Pdi1p activates Ero1p by direct reduction of Ero1p regulatory bonds; depletion of thiol substrates and accumulation of oxidized Pdi1p results in inactivation of Ero1p by both Pdi1p-m…
Sbay_7.521	1	0.565434	YGR229C	SMI1	1.76855	1	Protein involved in the regulation of cell wall synthesis; proposed to be involved in coordinating cell cycle progression with cell wall integrity
Sbay_10.551	1	0.565541	YLR435W	TSR2	1.76822	1.87028	Protein with a potential role in pre-rRNA processing
Sbay_11.198	1	0.566692	YKL027W		1.76463	1	Protein of unknown function, localized to the mitochondrial outer membrane
Sbay_14.34	1	0.566811	YNL305C	BXI1	1.76426	1	Protein involved in apoptosis; variously described as containing a BCL-2 homology (BH3) domain or as a member of the BAX inhibitor family; reported to promote apoptosis under some conditions and to inhibit it in others; localizes to ER and vacuole; may link the unfolded protein response to apoptosis via regulation of calcium-mediated signaling; translocates to mitochondria under apoptosis-inducin…
Sbay_11.225	1	0.566917	YKL004W	AUR1	1.76393	1	Phosphatidylinositol:ceramide phosphoinositol transferase (IPC synthase), required for sphingolipid synthesis; can mutate to confer aureobasidin A resistance
Sbay_15.20	0.999812	0.567293	YOL140W	ARG8	1.76276	0.269372	Acetylornithine aminotransferase, catalyzes the fourth step in the biosynthesis of the arginine precursor ornithine
Sbay_16.197	0.999841	0.567293	YPL112C	PEX25	1.76276	1	Peripheral peroxisomal membrane peroxin required for the regulation of peroxisome size and maintenance, recruits GTPase Rho1p to peroxisomes, induced by oleate, interacts with homologous protein Pex27p
Sbay_7.572	1	0.567742	NA	NA	1.76136	1	NA
Sbay_15.35	0.999976	0.567786	YOL125W	TRM13	1.76123	2.09491	2'-O-methyltransferase responsible for modification of tRNA at position 4; C-terminal domain has similarity to Rossmann-fold (RFM) superfamily of RNA methyltransferases
Sbay_2.526	1	0.56781	YDR353W	TRR1	1.76115	1	Cytoplasmic thioredoxin reductase; key regulatory enzyme that determines the redox state of the thioredoxin system, which acts as a disulfide reductase system and protects cells against both oxidative and reductive stress; protein abundance increases in response to DNA replication stress; TRR1 has a paralog, TRR2, that arose from the whole genome duplication
Sbay_10.231	1	0.568436	YLR138W	NHA1	1.75921	1	Na+/H+ antiporter involved in sodium and potassium efflux through the plasma membrane; required for alkali cation tolerance at acidic pH
Sbay_11.146	1	0.56863	YKL078W	DHR2	1.75861	1	Predominantly nucleolar DEAH-box ATP-dependent RNA helicase, required for 18S rRNA synthesis
Sbay_8.417	0.999052	0.568679	YOR360C	PDE2	1.75846	1	High-affinity cyclic AMP phosphodiesterase, component of the cAMP-dependent protein kinase signaling system, protects the cell from extracellular cAMP, contains readthrough motif surrounding termination codon
Sbay_7.284	0.999767	0.568828	YGR001C		1.758	1	Putative protein of unknown function with similarity to methyltransferase family members; green fluorescent protein (GFP)-fusion protein localizes to the cytoplasm; required for replication of Brome mosaic virus in S. cerevisiae
Sbay_2.607	1	0.568983	NA	NA	1.75752	1	NA
Sbay_6.230	1	0.569137	YJL151C	SNA3	1.75705	1	Protein involved in efficient MVB sorting of proteins to the vacuole; may function as an RSP5 adapter protein for MVB cargos; integral membrane protein localized to vacuolar intralumenal vesicles
Sbay_7.240	1	0.569423	YGL035C	MIG1	1.75616	1	Transcription factor involved in glucose repression; sequence specific DNA binding protein containing two Cys2His2 zinc finger motifs; regulated by the SNF1 kinase and the GLC7 phosphatase; regulates filamentous growth along with Mig2p in response to glucose depletion
Sbay_4.393	1	0.569434	YBR143C	SUP45	1.75613	1	Polypeptide release factor (eRF1) in translation termination; mutant form acts as a recessive omnipotent suppressor; methylated by Mtq2p-Trm112p in ternary complex eRF1-eRF3-GTP; mutation of methylation site confers resistance to zymocin; has a role in cytokinesis through interaction with Mlc1p
Sbay_11.203	1	0.569461	YKL023W		1.75605	1	Putative protein of unknown function, predicted by computational methods to be involved in mRNA degradation; green fluorescent protein (GFP)-fusion protein localizes to the cytoplasm
Sbay_4.507	0.999427	0.570729	YBR246W	RRT2	1.75214	1	Protein required for last step of diphthamide biosynthesis; deletion leads to resistance to sordarin and accumulation of diphthine; WD40 domain-containing protein involved in endosomal recycling; forms a complex with Rtt10p that functions in the retromer-mediated pathway for recycling internalized cell-surface proteins; non-essential gene identified in a screen for mutants with increased levels o…
Sbay_4.528	1	0.570879	YBR267W	REI1	1.75168	2.03636	Cytoplasmic pre-60S factor; required for the correct recycling of shuttling factors Alb1, Arx1 and Tif6 at the end of the ribosomal large subunit biogenesis; involved in bud growth in the mitotic signaling network
Sbay_10.544	0.999565	0.570898	YLR427W	MAG2	1.75162	1	Cytoplasmic protein of unknown function; induced in response to mycotoxin patulin; ubiquitinated protein similar to the human ring finger motif protein RNF10; predicted to be involved in repair of alkylated DNA due to interaction with MAG1
Sbay_2.639	1	0.571113	YDR463W	STP1	1.75097	1	Transcription factor; undergoes proteolytic processing by SPS (Ssy1p-Ptr3p-Ssy5p)-sensor component Ssy5p in response to extracellular amino acids; activates transcription of amino acid permease genes and may have a role in tRNA processing; STP1 has a paralog, STP2, that arose from the whole genome duplication
Sbay_13.387	1	0.571369	YMR205C	PFK2	1.75018	1	Beta subunit of heterooctameric phosphofructokinase involved in glycolysis, indispensable for anaerobic growth, activated by fructose-2,6-bisphosphate and AMP, mutation inhibits glucose induction of cell cycle-related genes
Sbay_12.65	1	0.571817	YJL012C	VTC4	1.74881	1	Vacuolar membrane polyphosphate polymerase; subunit of the vacuolar transporter chaperone (VTC) complex involved in synthesis and transfer of polyP to the vacuole; regulates membrane trafficking; role in non-autophagic vacuolar fusion; protein abundance increases in response to DNA replication stress
Sbay_13.437	0.994344	0.572001	YMR252C		1.74825	1	Putative protein of unknown function; green fluorescent protein (GFP)-fusion protein localizes to mitochondria; YMR252C is not an essential gene
Sbay_11.148	1	0.572695	YKL075C		1.74613	1	Putative protein of unknown function; green fluorescent protein (GFP)-fusion protein localizes to the cytoplasm; proposed to be involved in resistance to streptozotocin and camptothecin
Sbay_5.297	0.99999	0.572833	YER163C	GCG1	1.74571	1	Gamma-glutamyl cyclotransferase; cleaves the gamma-glutamyl bond of glutathione to yield 5-oxoproline and a Cys-Gly dipeptide; similar to mammalian pro-apoptotic protein ChaC1; expression of mouse ChaC1 in yeast increases apoptosis; green fluorescent protein (GFP)-fusion protein localizes to the cytoplasm and nucleus; periodically expressed during the metabolic cycle
Sbay_16.32	1	0.572924	NA	NA	1.74543	1	NA
Sbay_13.358	0.999786	0.573471	YMR177W	MMT1	1.74377	1	Putative metal transporter involved in mitochondrial iron accumulation; closely related to Mmt2p
Sbay_10.344	0.999997	0.573667	YLR247C	IRC20	1.74317	1	Putative helicase; localizes to the mitochondrion and the nucleus; YLR247C is not an essential gene; null mutant displays increased levels of spontaneous Rad52p foci
Sbay_5.95	0.999994	0.57394	YER007C-A	TMA20	1.74234	1	Protein of unknown function that associates with ribosomes; has a putative RNA binding domain; interacts with Tma22p; null mutant exhibits translation defects; has homology to human oncogene MCT-1; protein abundance increases in response to DNA replication stress
Sbay_6.141	1	0.573959	YJL065C	DLS1	1.74228	1	Subunit of ISW2/yCHRAC chromatin accessibility complex; ISW2/yCHRAC also includes Itc1p, Isw2p, and Dpb4p; involved in inheritance of telomeric silencing; DLS1 has a paralog, DPB3, that arose from the whole genome duplication
Sbay_8.271	0.999997	0.57432	YOR219C	STE13	1.74119	1	Dipeptidyl aminopeptidase, Golgi integral membrane protein that cleaves on the carboxyl side of repeating -X-Ala- sequences, required for maturation of alpha factor, transcription is induced by a-factor
Sbay_14.280	1	0.574818	YNL061W	NOP2	1.73968	2.69065	Probable RNA m(5)C methyltransferase, essential for processing and maturation of 27S pre-rRNA and large ribosomal subunit biogenesis; localized to the nucleolus; constituent of 66S pre-ribosomal particles
Sbay_10.227	1	0.57522	YLR134W	PDC5	1.73847	0.0984781	Minor isoform of pyruvate decarboxylase, key enzyme in alcoholic fermentation, decarboxylates pyruvate to acetaldehyde, regulation is glucose- and ethanol-dependent, repressed by thiamine, involved in amino acid catabolism
Sbay_16.265	1	0.575797	YPL050C	MNN9	1.73672	1	Subunit of Golgi mannosyltransferase complex also containing Anp1p, Mnn10p, Mnn11p, and Hoc1p that mediates elongation of the polysaccharide mannan backbone; forms a separate complex with Van1p that is also involved in backbone elongation
Sbay_14.226	1	0.576524	YNL112W	DBP2	1.73453	1	ATP-dependent RNA helicase of the DEAD-box protein family; has a strong preference for dsRNA; involved mRNA decay and rRNA processing; may be involved in suppression of transcription from cryptic initiation sites
Sbay_3.33	1	0.576653	YCR008W	SAT4	1.73415	0.685564	Ser/Thr protein kinase involved in salt tolerance; funtions in regulation of Trk1p-Trk2p potassium transporter; partially redundant with Hal5p; has similarity to Npr1p
Sbay_4.461	1	0.576719	YBR207W	FTH1	1.73395	0.67504	Putative high affinity iron transporter; involved in transport of intravacuolar stores of iron; forms complex with Fet5p; expression is regulated by iron; proposed to play indirect role in endocytosis; protein abundance increases in response to DNA replication stress
Sbay_15.374	1	0.577368	YHR174W	ENO2	1.732	1	Enolase II, a phosphopyruvate hydratase that catalyzes the conversion of 2-phosphoglycerate to phosphoenolpyruvate during glycolysis and the reverse reaction during gluconeogenesis; expression is induced in response to glucose
Sbay_4.454	0.999974	0.578071	YBR200W	BEM1	1.72989	1	Protein containing SH3-domains, involved in establishing cell polarity and morphogenesis; functions as a scaffold protein for complexes that include Cdc24p, Ste5p, Ste20p, and Rsr1p
Sbay_8.144	1	0.578475	YOR091W	TMA46	1.72868	2.2163	Protein of unknown function that associates with translating ribosomes; interacts with GTPase Rbg1p
Sbay_16.156	1	0.578804	YPL154C	PEP4	1.7277	0.614235	Vacuolar aspartyl protease (proteinase A), required for the posttranslational precursor maturation of vacuolar proteinases; important for protein turnover after oxidative damage; synthesized as a zymogen, self-activates
Sbay_7.480	1	0.578834	YGR187C	HGH1	1.72761	1	Nonessential protein of unknown function; predicted to be involved in ribosome biogenesis; green fluorescent protein (GFP)-fusion protein localizes to the cytoplasm; similar to mammalian BRP16 (Brain protein 16); relative distribution to the nucleus increases upon DNA replication stress
Sbay_2.123	1	0.579095	YBL004W	UTP20	1.72683	1	Component of the small-subunit (SSU) processome, which is involved in the biogenesis of the 18S rRNA
Sbay_14.140	0.999999	0.579159	YNL201C	PSY2	1.72664	1	Subunit of protein phosphatase PP4 complex; active complex is composed of catalytic subunit Pph3p and Psy2p, with Psy4p apparently providing additional substrate specificity in some cases; regulates recovery from the DNA damage checkpoint and also the gene conversion- and single-strand annealing-mediated pathways of meiotic double-strand break repair; Pph3p and Psy2p localize to foci on meiotic c…
Sbay_3.119	0.999643	0.579551	YCR082W	AHC2	1.72548	1	Component of the ADA histone acetyltransferase complex; Ach2p and Ach1p are unique to the ADA complex and not shared with the related SAGA and SLIK complexes; may tether Ach1p to the complex
Sbay_5.154	1	0.580074	YER049W	TPA1	1.72392	1	Poly(rA)-binding protein involved in translation termination efficiency, mRNA poly(A) tail length and mRNA stability; interacts with Sup45p (eRF1), Sup35p (eRF3) and Pab1p; similar to prolyl 4-hydroxylases; binds Fe(III) and 2-oxoglutarate
Sbay_16.68	1	0.580314	YPL239W	YAR1	1.7232	2.09407	Ankyrin-repeat containing, nucleocytoplasmic shuttling chaperone; prevents aggregation of Rps3p in the cytoplasm, associates with free Rps3p in the cytoplasm and delivers it to the 90S in the nucleus; required for 40S ribosomal subunit export, biogenesis and adaptation to osmotic and oxidative stress; expression repressed by heat shock
Sbay_4.251	0.999868	0.581023	YDL002C	NHP10	1.7211	1	Protein related to mammalian high mobility group proteins; preferentially binds DNA ends, protecting them from exonucleatic cleavage; likely component of the chromatin-remodeling complex INO80 complex; proposed to be involved in DNA repair
Sbay_9.18	0.970365	0.581617	YIL166C		1.71934	1	Putative protein with similarity to the allantoate permease (Dal5p) subfamily of the major facilitator superfamily; mRNA expression is elevated by sulfur limitation; YIL166C is a non-essential gene
Sbay_4.539	1	0.581793	YBR279W	PAF1	1.71882	1	Component of the Paf1p complex involved in transcription elongation; binds to and modulates the activity of RNA polymerases I and II; required for expression of a subset of genes, including cell cycle-regulated genes; involved in SER3 repression by helping to maintain SRG1 transcription-dependent nucleosome occupancy; homolog of human PD2/hPAF1
Sbay_2.624	1	0.582271	YDR449C	UTP6	1.71741	1	Nucleolar protein, component of the small subunit (SSU) processome containing the U3 snoRNA that is involved in processing of pre-18S rRNA
Sbay_11.197	1	0.582706	YKL028W	TFA1	1.71613	1	TFIIE large subunit, involved in recruitment of RNA polymerase II to the promoter, activation of TFIIH, and promoter opening
Sbay_10.374	1	0.583454	YLR276C	DBP9	1.71393	2.12116	DEAD-box protein required for 27S rRNA processing; exhibits DNA, RNA and DNA/RNA helicase activities; ATPase activity shows preference for DNA over RNA; DNA helicase activity abolished by mutation in RNA-binding domain
Sbay_5.237	0.998787	0.584144	YER116C	SLX8	1.71191	1	Subunit of Slx5-Slx8 SUMO-targeted ubiquitin ligase (STUbL) complex; stimulated by prior attachment of SUMO to the substrate; contains a C-terminal RING domain; forms nuclear foci upon DNA replication stress
Sbay_16.377	0.992536	0.584646	YPR048W	TAH18	1.71044	1	Conserved NAPDH-dependent diflavin reductase; component of an early step in the cytosolic Fe-S protein assembly (CIA) machinery; transfers electrons from NADPH to the Fe-S cluster of Dre2p; plays a pro-death role under oxidative stress; Tah18p-dependent nitric oxide synthesis confers high-temperature stress tolerance
Sbay_12.207	0.995739	0.58471	YJR116W	TDA4	1.71025	1	Putative protein of unknown function; null mutant is sensitive to expression of the top1-T722A allele
Sbay_13.513	0.999988	0.585127	YMR318C	ADH6	1.70903	1	NADPH-dependent medium chain alcohol dehydrogenase; has broad substrate specificity; member of the cinnamyl family of alcohol dehydrogenases; may be involved in fusel alcohol synthesis or in aldehyde tolerance; protein abundance increases in response to DNA replication stress
Sbay_11.205	1	0.585279	YKL021C	MAK11	1.70859	2.01628	Protein involved in an early, nucleolar step of 60S ribosomal subunit biogenesis; essential for cell growth and replication of killer M1 dsRNA virus; contains four beta-transducin repeats
Sbay_7.325	0.995029	0.586222	YGR040W	KSS1	1.70584	1	Mitogen-activated protein kinase (MAPK) involved in signal transduction pathways that control filamentous growth and pheromone response; the KSS1 gene is nonfunctional in S288C strains and functional in W303 strains
Sbay_4.93	1	0.586841	YDL153C	SAS10	1.70404	1	Essential subunit of U3-containing Small Subunit (SSU) processome complex involved in production of 18S rRNA and assembly of small ribosomal subunit; disrupts silencing when overproduced; mutant has increased aneuploidy tolerance
Sbay_16.287	0.999977	0.58693	YPL030W	TRM44	1.70378	1	tRNA(Ser) Um(44) 2'-O-methyltransferase; involved in maintaining levels of the tRNA-Ser species tS(CGA) and tS(UGA); conserved among metazoans and fungi but there does not appear to be a homolog in plants; TRM44 is a non-essential gene
Sbay_8.57	1	0.58713	NA	NA	1.7032	1	NA
Sbay_16.114	0.98896	0.588833	YPL192C	PRM3	1.69827	1	Pheromone-regulated protein required for nuclear envelope fusion during karyogamy; localizes to the outer face of the nuclear membrane; interacts with Kar5p at the spindle pole body
Sbay_4.547	0.998054	0.589271	YBR287W		1.69701	1	Protein of unknown function; green fluorescent protein (GFP)-fusion protein localizes to the ER; YBR287W is not an essential gene
Sbay_5.249	0.985429	0.589287	YER128W	VFA1	1.69697	1	Protein that interacts with Vps4p and has a role in vacuolar sorting; localizes to endosomes in a Vps4-dependent manner; overexpression causes canavanine sensitivity and confers a partial class D vacuole morphology
Sbay_15.53	1	0.589562	YOL109W	ZEO1	1.69617	1.92875	Peripheral membrane protein of the plasma membrane that interacts with Mid2p; regulates the cell integrity pathway mediated by Pkc1p and Slt2p; the authentic protein is detected in a phosphorylated state in highly purified mitochondria
Sbay_10.292	1	0.590295	YLR196W	PWP1	1.69407	2.34759	Protein with WD-40 repeats involved in rRNA processing; associates with trans-acting ribosome biogenesis factors; similar to beta-transducin superfamily
Sbay_3.38	1	0.590392	YCR012W	PGK1	1.69379	0.826496	3-phosphoglycerate kinase, catalyzes transfer of high-energy phosphoryl groups from the acyl phosphate of 1,3-bisphosphoglycerate to ADP to produce ATP; key enzyme in glycolysis and gluconeogenesis
Sbay_10.247	0.978545	0.590786	YLR149C		1.69266	1	Protein of unknown function; overexpression causes a cell cycle delay or arrest; null mutation results in a decrease in plasma membrane electron transport; YLR149C is not an essential gene; protein abundance increases in response to DNA replication stress
Sbay_12.84	1	0.590791	YJR002W	MPP10	1.69265	1	Component of the SSU processome and 90S preribosome, required for pre-18S rRNA processing, interacts with and controls the stability of Imp3p and Imp4p, essential for viability; similar to human Mpp10p
Sbay_15.128	1	0.591044	YOL041C	NOP12	1.69192	1	Nucleolar protein involved in pre-25S rRNA processing and biogenesis of large 60S ribosomal subunit; contains an RNA recognition motif (RRM); binds to Ebp2; similar to Nop13p and Nsr1p
Sbay_7.577	1	0.591148	YGR281W	YOR1	1.69162	1	Plasma membrane ATP-binding cassette (ABC) transporter, multidrug transporter mediates export of many different organic anions including oligomycin; similar to human cystic fibrosis transmembrane receptor (CFTR)
Sbay_14.409	0.999982	0.591367	YNR054C	ESF2	1.691	1	Essential nucleolar protein involved in pre-18S rRNA processing; binds to RNA and stimulates ATPase activity of Dbp8; involved in assembly of the small subunit (SSU) processome
Sbay_9.234	0.950814	0.592058	NA	NA	1.68902	1	NA
Sbay_11.297	0.999995	0.59427	YKR062W	TFA2	1.68274	1	TFIIE small subunit, involved in RNA polymerase II transcription initiation
Sbay_10.97	1	0.594831	YLR017W	MEU1	1.68115	2.2165	Methylthioadenosine phosphorylase (MTAP), catalyzes the initial step in the methionine salvage pathway; affects polyamine biosynthesis through regulation of ornithine decarboxylase (Spe1p) activity; regulates ADH2 gene expression
Sbay_2.144	1	0.594869	YBR016W		1.68104	1	Tail-anchored plasma membrane protein with a conserved CYSTM module; predicted to be palmitoylated; has similarity to hydrophilins, which are involved in the adaptive response to hyperosmotic conditions; YBR016W has a paralog, YDL012C, that arose from the whole genome duplication
Sbay_13.167	0.999953	0.595835	YMR004W	MVP1	1.67832	1	Protein required for sorting proteins to the vacuole; Mvp1p and Vps1p act in concert to promote membrane traffic to the vacuole; participates in transcription initiation and/or early elongation of specific genes; interacts with "foot domain" of RNA polymerase II; deletion results in abnormal CTD-Ser5 phosphorylation of RNA polymerase II at specific promoter regions; protein abundance increases in…
Sbay_10.222	1	0.597202	YLR129W	DIP2	1.67448	1	Nucleolar protein, specifically associated with the U3 snoRNA, part of the large ribonucleoprotein complex known as the small subunit (SSU) processome, required for 18S rRNA biogenesis, part of the active pre-rRNA processing complex
Sbay_2.55	1	0.597323	YBL061C	SKT5	1.67414	1	Activator of Chs3p (chitin synthase III) during vegetative growth; recruits Chs3p to the bud neck via interaction with Bni4p; SKT5 has a paralog, SHC1, that arose from the whole genome duplication
Sbay_16.184	1	0.597476	YPL126W	NAN1	1.67371	2.72214	U3 snoRNP protein, component of the small (ribosomal) subunit (SSU) processosome containing U3 snoRNA; required for the biogenesis of18S rRNA
Sbay_8.321	1	0.598032	YOR272W	YTM1	1.67215	3.06986	Constituent of 66S pre-ribosomal particles, forms a complex with Nop7p and Erb1p that is required for maturation of the large ribosomal subunit; has seven C-terminal WD repeats
Sbay_4.261	1	0.598563	YDR007W	TRP1	1.67067	1	Phosphoribosylanthranilate isomerase that catalyzes the third step in tryptophan biosynthesis; in 2004, the sequence of TRP1 from strain S228C was updated by changing the previously annotated internal STOP (TAA) to serine (TCA)
Sbay_7.345	1	0.599584	YGR063C	SPT4	1.66782	1	Component of the universally conserved Spt4/5 complex (DSIF complex); the complex has multiple roles in concert with RNA polymerases I and II, including regulation of transcription elongation, RNA processing, quality control, and transcription-coupled DNA repair; Spt4p also localizes to kinetochores and heterochromatin and affects chromosome dynamics and silencing; required for transcription thro…
Sbay_15.74	1	0.599808	YOL092W	YPQ1	1.6672	1.62803	Putative vacuolar membrane transporter for cationic amino acids; likely contributes to amino acid homeostasis by exporting cationic amino acids from the vacuole; member of the PQ-loop family, with seven transmembrane domains; similar to mammalian PQLC2 vacuolar transporter
Sbay_13.300	1	0.600773	YMR121C	RPL15B	1.66452	2.18104	Ribosomal 60S subunit protein L15B; binds to 5.8 S rRNA; homologous to mammalian ribosomal protein L15, no bacterial homolog; RPL15B has a paralog, RPL15A, that arose from the whole genome duplication; relocalizes from nucleus to nucleolus upon DNA replication stress
Sbay_4.135	1	0.6017	YDL111C	RRP42	1.66196	2.2016	Exosome non-catalytic core component; involved in 3'-5' RNA processing and degradation in both the nucleus and the cytoplasm; has similarity to E. coli RNase PH and to human hRrp42p (EXOSC7)
Sbay_10.433	0.995955	0.602655	YLR336C	SGD1	1.65932	1	Essential nuclear protein, required for biogenesis of the small ribosomal subunit; has a possible role in the osmoregulatory glycerol response; putative homolog of human NOM1 which is implicated in acute myeloid leukemia
Sbay_14.98	1	0.603253	YNL244C	SUI1	1.65768	1.40084	Translation initiation factor eIF1; component of a complex involved in recognition of the initiator codon; modulates translation accuracy at the initiation phase
Sbay_10.428	1	0.60354	YLR332W	MID2	1.65689	1	O-glycosylated plasma membrane protein that acts as a sensor for cell wall integrity signaling and activates the pathway; interacts with Rom2p, a guanine nucleotide exchange factor for Rho1p, and with cell integrity pathway protein Zeo1p
Sbay_16.193	1	0.604007	YPL117C	IDI1	1.65561	1	Isopentenyl diphosphate:dimethylallyl diphosphate isomerase (IPP isomerase), catalyzes an essential activation step in the isoprenoid biosynthetic pathway; required for viability
Sbay_7.157	1	0.604033	YGL111W	NSA1	1.65554	2.37221	Constituent of 66S pre-ribosomal particles, involved in 60S ribosomal subunit biogenesis
Sbay_11.99	1	0.604034	YMR104C	YPK2	1.65554	0.712155	Protein kinase with similarity to serine/threonine protein kinase Ypk1p; functionally redundant with YPK1 at the genetic level; participates in a signaling pathway required for optimal cell wall integrity; homolog of mammalian kinase SGK; YPK2 has a paralog, YPK1, that arose from the whole genome duplication
Sbay_12.133	0.965743	0.604898	YJR049C	UTR1	1.65317	1	ATP-NADH kinase; phosphorylates both NAD and NADH; active as a hexamer; enhances the activity of ferric reductase (Fre1p); UTR1 has a paralog, YEF1, that arose from the whole genome duplication
Sbay_9.153	1	0.604976	YIL047C	SYG1	1.65296	0.710445	Plasma membrane protein of unknown function; truncation and overexpression suppresses lethality of G-alpha protein deficiency
Sbay_15.89	1	0.605746	YOL077C	BRX1	1.65086	1	Nucleolar protein, constituent of 66S pre-ribosomal particles; depletion leads to defects in rRNA processing and a block in the assembly of large ribosomal subunits; possesses a sigma(70)-like RNA-binding motif
Sbay_7.148	1	0.605752	YGL120C	PRP43	1.65084	1	RNA helicase in the DEAH-box family, functions in both RNA polymerase I and polymerase II transcript metabolism, involved in release of the lariat-intron from the spliceosome
Sbay_10.158	0.999919	0.606193	YLR074C	BUD20	1.64964	1.95613	Protein involved in bud-site selection; diploid mutants display a random budding pattern instead of the wild-type bipolar pattern
Sbay_14.207	1	0.606224	YNL132W	KRE33	1.64956	2.67612	Essential protein, required for biogenesis of the small ribosomal subunit; heterozygous mutant shows haploinsufficiency in K1 killer toxin resistance
Sbay_13.155	1	0.606553	YML007W	YAP1	1.64866	1	Basic leucine zipper (bZIP) transcription factor; required for oxidative stress tolerance; activated by H2O2 through the multistep formation of disulfide bonds and transit from the cytoplasm to the nucleus; Yap1p is degraded in the nucleus after the oxidative stress has passed; mediates resistance to cadmium; YAP1 has a paralog, CAD1, that arose from the whole genome duplication; relative distrib…
Sbay_14.225	0.999988	0.606746	YNL113W	RPC19	1.64814	2.8161	RNA polymerase subunit AC19, common to RNA polymerases I and III
Sbay_5.66	1	0.606993	YEL018W	EAF5	1.64747	1	Esa1p-associated factor, non-essential subunit of the NuA4 acetyltransferase complex
Sbay_13.311	1	0.607382	YMR131C	RRB1	1.64641	2.16307	Essential nuclear protein involved in early steps of ribosome biogenesis; physically interacts with the ribosomal protein Rpl3p
Sbay_14.123	1	0.60785	YNL219C	ALG9	1.64514	1	Mannosyltransferase, involved in N-linked glycosylation; catalyzes both the transfer of seventh mannose residue on B-arm and ninth mannose residue on the C-arm from Dol-P-Man to lipid-linked oligosaccharides; mutation of the human ortholog causes type 1 congenital disorders of glycosylation
Sbay_13.413	1	0.608704	YMR229C	RRP5	1.64284	1	RNA binding protein involved in synthesis of both 18S and 5.8S rRNAs; component of both the ribosomal small subunit (SSU) processosome and the 90S preribosome; has binding preference for single stranded tracts of U's; relocalizes from nucleolus to nucleus upon DNA replication stress
Sbay_5.120	1	0.609041	YER025W	GCD11	1.64193	1	Gamma subunit of the translation initiation factor eIF2, involved in the identification of the start codon; binds GTP when forming the ternary complex with GTP and tRNAi-Met
Sbay_1.57	1	0.611204	YAL011W	SWC3	1.63612	1	Protein of unknown function, component of the SWR1 complex, which exchanges histone variant H2AZ (Htz1p) for chromatin-bound histone H2A; required for formation of nuclear-associated array of smooth endoplasmic reticulum known as karmellae
Sbay_10.339	0.999988	0.611456	YLR243W	GPN3	1.63544	1	Putative GTPase with a role in biogenesis of RNA pol II and polIII; may be involved in assembly of RNA polymerases II and III and in their transport into the nucleus; contains a Gly-Pro-Asn motif in the G domain; similar to Npa3p and Gpn2p
Sbay_10.147	0.995302	0.611742	YLR063W		1.63468	1	Putative S-adenosylmethionine-dependent methyltransferase; green fluorescent protein (GFP)-fusion protein localizes to the cytoplasm; YLR063W is not an essential gene
Sbay_16.473	1	0.61246	YPR144C	NOC4	1.63276	1	Nucleolar protein, forms a complex with Nop14p that mediates maturation and nuclear export of 40S ribosomal subunits
Sbay_7.416	1	0.612568	YGR128C	UTP8	1.63247	1	Nucleolar protein required for export of tRNAs from the nucleus; also copurifies with the small subunit (SSU) processome containing the U3 snoRNA that is involved in processing of pre-18S rRNA
Sbay_2.261	1	0.613228	YDR101C	ARX1	1.63071	3.4698	Shuttling pre-60S factor; involved in the biogenesis of ribosomal large subunit biogenesis; interacts directly with Alb1; responsible for Tif6 recycling defects in absence of Rei1; associated with the ribosomal export complex
Sbay_15.164	0.999993	0.614132	YOL010W	RCL1	1.62832	1.98693	Endonuclease that cleaves pre-rRNA at site A2 for 18S rRNA biogenesis; subunit of U3-containing 90S preribosome processome complex involved in small ribosomal subunit assembly; stimulates Bms1p GTPase and U3 binding activity; similar to RNA cyclase-like proteins but no cyclase activity detected
Sbay_2.688	1	0.614141	YDR508C	GNP1	1.62829	1	High-affinity glutamine permease; also transports Leu, Ser, Thr, Cys, Met and Asn; expression is fully dependent on Grr1p and modulated by the Ssy1p-Ptr3p-Ssy5p (SPS) sensor of extracellular amino acids; GNP1 has a paralog, AGP1, that arose from the whole genome duplication
Sbay_11.161	1	0.614161	YKL064W	MNR2	1.62824	1	Vacuolar membrane protein required for magnesium homeostasis; putative magnesium transporter; has similarity to Alr1p and Alr2p, which mediate influx of Mg2+ and other divalent cations
Sbay_7.219	0.996111	0.614562	YGL054C	ERV14	1.62718	1	COPII-coated vesicle protein; involved in vesicle formation and incorporation of specific secretory cargo; required for the delivery of bud-site selection protein Axl2p to cell surface; related to Drosophila cornichon; ERV14 has a paralog, ERV15, that arose from the whole genome duplication
Sbay_5.134	1	0.615728	YER036C	ARB1	1.62409	2.09597	ATPase of the ATP-binding cassette (ABC) family involved in 40S and 60S ribosome biogenesis, has similarity to Gcn20p; shuttles from nucleus to cytoplasm, physically interacts with Tif6p, Lsg1p
Sbay_10.387	0.999935	0.615856	YLR291C	GCD7	1.62376	1	Beta subunit of the translation initiation factor eIF2B, the guanine-nucleotide exchange factor for eIF2; activity subsequently regulated by phosphorylated eIF2; first identified as a negative regulator of GCN4 expression
Sbay_7.232	0.999986	0.616111	YGL043W	DST1	1.62308	1	General transcription elongation factor TFIIS, enables RNA polymerase II to read through blocks to elongation by stimulating cleavage of nascent transcripts stalled at transcription arrest sites; maintains RNAPII elongation activity on ribosomal protein genes during conditions of transcriptional stress
Sbay_2.63	0.999983	0.616203	YBL054W	TOD6	1.62284	1	PAC motif binding protein involved in rRNA and ribosome biogenesis; subunit of the RPD3L histone deacetylase complex; Myb-like HTH transcription factor; hypophosphorylated by rapamycin treatment in a Sch9p-dependent manner; TOD6 has a paralog, DOT6, that arose from the whole genome duplication
Sbay_10.67	1	0.616576	YLL008W	DRS1	1.62186	2.89938	Nucleolar DEAD-box protein required for ribosome assembly and function, including synthesis of 60S ribosomal subunits; constituent of 66S pre-ribosomal particles
Sbay_2.246	0.99952	0.617886	YDR086C	SSS1	1.61842	1	Subunit of the Sec61p translocation complex (Sec61p-Sss1p-Sbh1p) that forms a channel for passage of secretory proteins through the endoplasmic reticulum membrane, and of the Ssh1p complex (Ssh1p-Sbh2p-Sss1p); interacts with Ost4p and Wbp1p
Sbay_4.96	1	0.620623	YDL148C	NOP14	1.61128	1	Nucleolar protein, forms a complex with Noc4p that mediates maturation and nuclear export of 40S ribosomal subunits; also present in the small subunit processome complex, which is required for processing of pre-18S rRNA
Sbay_6.172	1	0.621433	YJL098W	SAP185	1.60918	1	Protein that forms a complex with the Sit4p protein phosphatase; required for Sit4p function; member of a family of similar proteins including Sap4p, Sap155p, and Sap190p; SAP185 has a paralog, SAP190, that arose from the whole genome duplication
Sbay_4.266	1	0.621744	YBR034C	HMT1	1.60838	2.65616	Nuclear SAM-dependent mono- and asymmetric arginine dimethylating methyltransferase that modifies hnRNPs, including Npl3p and Hrp1p, affecting their activity and nuclear export; methylates U1 snRNP protein Snp1p and ribosomal protein Rps2p; interacts genetically with genes encoding components of Rpd3(L) and this interaction is important for Rpd3 recruitment to the subtelomeric region.
Sbay_6.196	1	0.621821	YJL115W	ASF1	1.60818	1	Nucleosome assembly factor, involved in chromatin assembly and disassembly, anti-silencing protein that causes derepression of silent loci when overexpressed; plays a role in regulating Ty1 transposition
Sbay_10.149	0.992836	0.621892	YLR065C	ENV10	1.608	1	Protein proposed to be involved in vacuolar functions; mutant shows defect in CPY processing; YLR065C is not an essential gene
Sbay_2.641	1	0.621954	YDR465C	RMT2	1.60784	2.50266	Arginine N5 methyltransferase; methylates ribosomal protein Rpl12 (L12) on Arg67; relative distribution to the nucleus increases upon DNA replication stress
Sbay_7.435	1	0.622216	YGR145W	ENP2	1.60716	1	Essential nucleolar protein, required for biogenesis of the small ribosomal subunit; contains WD repeats, interacts with Mpp10p and Bfr2p, and has homology to Spb1p
Sbay_2.262	1	0.622637	YDR103W	STE5	1.60607	1	Pheromone-responsive MAPK scaffold protein; couples activation of the G-protein-coupled pheromone receptor to MAPK activation; intramolecular interaction of PH and VWA domains blocks activation of assembled signaling cascade components (Ste11p, Ste7p and Fus3p) under basal conditions; Gbeta-gamma (Ste4p-Ste18p)-dependent docking at the plasma membrane and binding of PI(4,5)P2 by the PH domain rel…
Sbay_16.141	1	0.622716	YPL169C	MEX67	1.60587	1	Poly(A)RNA binding protein involved in nuclear mRNA export, component of the nuclear pore; ortholog of human TAP
Sbay_14.95	1	0.622746	YNL247W		1.60579	1.55195	Cysteinyl-tRNA synthetase; may interact with ribosomes, based on co-purification experiments
Sbay_11.82	1	0.622791	YKL143W	LTV1	1.60568	2.42742	Component of the GSE complex, which is required for proper sorting of amino acid permease Gap1p; required for ribosomal small subunit export from nucleus; required for growth at low temperature
Sbay_2.281	1	0.62336	YDR120C	TRM1	1.60421	2.14333	tRNA methyltransferase; two forms of the protein are made by alternative translation starts; localizes to both the nucleus and mitochondrion to produce the modified base N2,N2-dimethylguanosine in tRNAs in both compartments
Sbay_4.228	1	0.623508	YDL020C	RPN4	1.60383	1	Transcription factor that stimulates expression of proteasome genes; Rpn4p levels are in turn regulated by the 26S proteasome in a negative feedback control mechanism; RPN4 is transcriptionally regulated by various stress responses; relative distribution to the nucleus increases upon DNA replication stress
Sbay_5.199	1	0.623813	YER086W	ILV1	1.60304	1.54861	Threonine deaminase, catalyzes the first step in isoleucine biosynthesis; expression is under general amino acid control; ILV1 locus exhibits highly positioned nucleosomes whose organization is independent of known ILV1 regulation
Sbay_2.329	1	0.623915	YDR165W	TRM82	1.60278	1	Catalytic subunit of a tRNA methyltransferase complex; Trm8p and Trm82p comprise an enzyme that catalyzes a methyl-transfer from S-adenosyl-l-methionine to the N(7) atom of guanine at position 46 in tRNA; Trm8 lacks catalytic activity if not bound to Trm82p
Sbay_4.254	1	0.624016	YDR001C	NTH1	1.60252	0.767001	Neutral trehalase, degrades trehalose; required for thermotolerance and may mediate resistance to other cellular stresses; may be phosphorylated by Cdc28p; NTH1 has a paralog, NTH2, that arose from the whole genome duplication
Sbay_15.399	1	0.624175	YHR196W	UTP9	1.60211	1	Nucleolar protein, component of the small subunit (SSU) processome containing the U3 snoRNA that is involved in processing of pre-18S rRNA
Sbay_2.377	0.999931	0.625181	YDR210W		1.59954	1	Predicted tail-anchored plasma membrane protein containing a conserved CYSTM module; related proteins in other organisms may be involved in response to stress; green fluorescent protein (GFP)-fusion protein localizes to the cell periphery
Sbay_8.41	0.999999	0.625428	YHL011C	PRS3	1.5989	1	5-phospho-ribosyl-1(alpha)-pyrophosphate synthetase, synthesizes PRPP, which is required for nucleotide, histidine, and tryptophan biosynthesis; one of five related enzymes, which are active as heteromultimeric complexes
Sbay_14.111	0.999682	0.627306	YNL232W	CSL4	1.59412	1	Exosome non-catalytic core component; involved in 3'-5' RNA processing and degradation in both the nucleus and the cytoplasm; predicted to contain an S1 RNA binding domain; has similarity to human hCsl4p (EXOSC1)
Sbay_6.238	1	0.62764	NA	NA	1.59327	1	NA
Sbay_6.144	0.999993	0.627686	YJL069C	UTP18	1.59315	1.67025	Possible U3 snoRNP protein involved in maturation of pre-18S rRNA, based on computational analysis of large-scale protein-protein interaction data
Sbay_12.223	1	0.627747	YJR132W	NMD5	1.593	1	Karyopherin, a carrier protein involved in nuclear import of proteins; importin beta homolog
Sbay_5.206	1	0.627848	YER090W	TRP2	1.59274	1.75386	Anthranilate synthase, catalyzes the initial step of tryptophan biosynthesis, forms multifunctional hetero-oligomeric anthranilate synthase:indole-3-glycerol phosphate synthase enzyme complex with Trp3p
Sbay_2.171	0.970079	0.628086	YDR021W	FAL1	1.59214	1	Nucleolar protein required for maturation of 18S rRNA, member of the eIF4A subfamily of DEAD-box ATP-dependent RNA helicases
Sbay_10.136	0.999981	0.629225	YLR052W	IES3	1.58926	1	Subunit of the INO80 chromatin remodeling complex
Sbay_7.489	0.99998	0.629894	YGR195W	SKI6	1.58757	1	Exosome non-catalytic core component; involved in 3'-5' RNA processing and degradation in both the nucleus and the cytoplasm; has similarity to E. coli RNase PH and to human hRrp41p (EXOSC4)
Sbay_10.462	0.993231	0.630135	YLR361C	DCR2	1.58696	1	Phosphoesterase involved in downregulation of the unfolded protein response, at least in part via dephosphorylation of Ire1p; dosage-dependent positive regulator of the G1/S phase transition through control of the timing of START
Sbay_10.516	1	0.63021	YLR399C	BDF1	1.58677	1	Protein involved in transcription initiation at TATA-containing promoters; associates with the basal transcription factor TFIID; contains two bromodomains; corresponds to the C-terminal region of mammalian TAF1; redundant with Bdf2p
Sbay_2.247	1	0.630522	YDR087C	RRP1	1.58599	2.63218	Essential evolutionarily conserved nucleolar protein necessary for biogenesis of 60S ribosomal subunits and processing of pre-rRNAs to mature rRNAs, associated with several distinct 66S pre-ribosomal particles
Sbay_15.81	0.999999	0.630902	YOL086C	ADH1	1.58503	1.44698	Alcohol dehydrogenase; fermentative isozyme active as homo- or heterotetramers; required for the reduction of acetaldehyde to ethanol, the last step in the glycolytic pathway; ADH1 has a paralog, ADH5, that arose from the whole genome duplication
Sbay_11.328	1	0.631058	YKR092C	SRP40	1.58464	3.32268	Nucleolar, serine-rich protein with a role in preribosome assembly or transport; may function as a chaperone of small nucleolar ribonucleoprotein particles (snoRNPs); immunologically and structurally to rat Nopp140
Sbay_9.222	0.999995	0.631138	YIR011C	STS1	1.58444	1	Protein required for localizing proteasomes to the nucleus; interacts with the karyopherin Srp1p; involved in ubiquitin-mediated protein degradation
Sbay_8.111	1	0.632824	YOR061W	CKA2	1.58022	1	Alpha' catalytic subunit of casein kinase 2 (CK2); CK2 is a Ser/Thr protein kinase with roles in cell growth and proliferation; CK2, comprised of CKA1, CKA2, CKB1 and CKB2, has many substrates including transcription factors and all RNA polymerases; protein abundance increases in response to DNA replication stress; regulates Fkh1p-mediated donor preference during mating-type switching
Sbay_16.306	1	0.633003	YPL012W	RRP12	1.57977	1	Protein required for export of the ribosomal subunits; associates with the RNA components of the pre-ribosomes; has a role in nuclear import in association with Pse1p; contains HEAT-repeats
Sbay_13.158	0.989423	0.63341	YML005W	TRM12	1.57876	1	S-adenosylmethionine-dependent methyltransferase of the seven beta-strand family; required for wybutosine formation in phenylalanine-accepting tRNA
Sbay_6.103	1	0.634005	YFR030W	MET10	1.57727	1	Subunit alpha of assimilatory sulfite reductase, which converts sulfite into sulfide
Sbay_15.73	1	0.634429	YOL093W	TRM10	1.57622	2.13169	tRNA methyltransferase; methylates the N-1 position of guanosine in tRNAs; protein abundance increases in response to DNA replication stress
Sbay_12.159	0.995658	0.638971	YJR069C	HAM1	1.56502	1	Nucleoside triphosphate pyrophosphohydrolase; active against a wide range of substrates including ITP, dITP and XTP; mediates exclusion of noncanonical purines and pyrimadines from deoxyribonucleoside triphosphate pools; mutant is sensitive to the base analog 6-N-hydroxylaminopurine; protein abundance increases in response to DNA replication stress
Sbay_2.80	1	0.639264	NA	NA	1.5643	3.37901	NA
Sbay_10.99	1	0.639478	YLR019W	PSR2	1.56378	1	Functionally redundant Psr1p homolog, a plasma membrane phosphatase involved in the general stress response; required with Psr1p and Whi2p for full activation of STRE-mediated gene expression, possibly through dephosphorylation of Msn2p
Sbay_16.210	0.999996	0.639681	YPL101W	ELP4	1.56328	1	Subunit of hexameric RecA-like ATPase Elp456 Elongator subcomplex; which is required for modification of wobble nucleosides in tRNA; required for Elongator structural integrity
Sbay_14.158	0.999443	0.639837	YNL183C	NPR1	1.5629	1	Protein kinase that stabilizes several plasma membrane amino acid transporters by antagonizing their ubiquitin-mediated degradation; phosphorylates Aly2p; negatively regulates Ldb19p-mediated endocytosis through phosphorylation of Ldb19p, which prevents its association with the plasma membrane; Npr1p activity is negatively regulated via phosphorylation by the TOR complex
Sbay_16.92	0.987375	0.639898	YPL214C	THI6	1.56275	0.357801	Bifunctional enzyme with thiamine-phosphate pyrophosphorylase and 4-methyl-5-beta-hydroxyethylthiazole kinase activities, required for thiamine biosynthesis; GFP-fusion protein localizes to the cytoplasm in a punctate pattern
Sbay_7.443	0.997302	0.640535	YGR152C	RSR1	1.56119	1	GTP-binding protein of the ras superfamily required for bud site selection, morphological changes in response to mating pheromone, and efficient cell fusion; localized to the plasma membrane; significantly similar to mammalian Rap GTPases
Sbay_7.17	0.999993	0.640542	YGL244W	RTF1	1.56118	1	Subunit of RNAPII-associated chromatin remodeling Paf1 complex; regulates gene expression by directing cotranscriptional histone modification, influences transcription and chromatin structure through several independent functional domains; directly or indirectly regulates DNA-binding properties of Spt15p and relative activities of different TATA elements; involved in transcription elongation as d…
Sbay_15.68	1	0.641475	YOL097C	WRS1	1.55891	1.83883	Cytoplasmic tryptophanyl-tRNA synthetase, aminoacylates tryptophanyl-tRNA
Sbay_15.176	0.999998	0.641583	YOR001W	RRP6	1.55865	1	Nuclear exosome exonuclease component; has 3'-5' exonuclease activity; involved in RNA processing, maturation, surveillance, degradation, tethering, and export; has similarity to E. coli RNase D and to human PM-Sc1 100 (EXOSC10); mutant displays reduced transcription elongation in the G-less-based run-on (GLRO) assay
Sbay_16.39	1	0.641619	YPL266W	DIM1	1.55856	2.31045	Essential 18S rRNA dimethylase (dimethyladenosine transferase), responsible for conserved m6(2)Am6(2)A dimethylation in 3'-terminal loop of 18S rRNA, part of 90S and 40S pre-particles in nucleolus, involved in pre-ribosomal RNA processing
Sbay_11.121	1	0.641679	YKL103C	APE1	1.55841	1	Vacuolar aminopeptidase yscI; zinc metalloproteinase that belongs to the peptidase family M18; often used as a marker protein in studies of autophagy and cytosol to vacuole targeting (CVT) pathway; protein increases in abundance and relative distribution to cytoplasmic foci increases upon DNA replication stress
Sbay_14.156	1	0.642499	YNL186W	UBP10	1.55642	1.32995	Ubiquitin-specific protease, deubiquitinates Ub-protein moieties; interacts with proteins that function in rRNA production and ribosome biogenesis; stabilizes Rpa190p, the largest subunit of RNAP I, by mediating its deubiquitination; may regulate silencing by acting on Sir4p; involved in posttranscriptionally regulating Gap1p and possibly other transporters; localized to the nucleolus; human USP3…
Sbay_7.579	1	0.642611	YGR282C	BGL2	1.55615	1	Endo-beta-1,3-glucanase, major protein of the cell wall, involved in cell wall maintenance
Sbay_11.267	0.980111	0.642684	YKR035W-A	DID2	1.55597	1	Class E protein of the vacuolar protein-sorting (Vps) pathway; binds Vps4p and directs it to dissociate ESCRT-III complexes; forms a functional and physical complex with Ist1p; human ortholog may be altered in breast tumors
Sbay_4.107	1	0.644622	YDL137W	ARF2	1.5513	0.753187	ADP-ribosylation factor; GTPase of the Ras superfamily involved in regulation of coated formation vesicles in intracellular trafficking within the Golgi; ARF2 has a paralog, ARF1, that arose from the whole genome duplication
Sbay_7.410	1	0.644909	YGR124W	ASN2	1.55061	2.28757	Asparagine synthetase; catalyzes the synthesis of L-asparagine from L-aspartate in the asparagine biosynthetic pathway; ASN2 has a paralog, ASN1, that arose from the whole genome duplication
Sbay_10.519	0.99853	0.64504	YLR403W	SFP1	1.55029	1	Regulates transcription of ribosomal protein and biogenesis genes; regulates response to nutrients and stress, G2/M transitions during mitotic cell cycle and DNA-damage response, and modulates cell size; regulated by TORC1 and Mrs6p; sequence of zinc finger, ChIP localization data, and protein-binding microarray (PBM) data, and computational analyses suggest it binds DNA directly at highly active…
Sbay_7.167	1	0.645274	YGL099W	LSG1	1.54973	1.85358	Putative GTPase involved in 60S ribosomal subunit biogenesis; required for the release of Nmd3p from 60S subunits in the cytoplasm
Sbay_9.191	0.986384	0.645416	YIL014W	MNT3	1.54939	1	Alpha-1,3-mannosyltransferase, adds the fourth and fifth alpha-1,3-linked mannose residues to O-linked glycans during protein O-glycosylation
Sbay_10.567	1	0.646007	YML074C	FPR3	1.54797	2.95109	Nucleolar peptidyl-prolyl cis-trans isomerase (PPIase); FK506 binding protein; phosphorylated by casein kinase II (Cka1p-Cka2p-Ckb1p-Ckb2p) and dephosphorylated by Ptp1p
Sbay_2.707	0.99864	0.646326	NA	NA	1.54721	1	NA
Sbay_13.504	0.999997	0.646888	YMR311C	GLC8	1.54586	1	Regulatory subunit of protein phosphatase 1 (Glc7p); involved in glycogen metabolism and chromosome segregation; proposed to regulate Glc7p activity via conformational alteration; ortholog of the mammalian protein phosphatase inhibitor 2; protein abundance increases in response to DNA replication stress
Sbay_15.400	1	0.647258	YHR197W	RIX1	1.54498	1	Component of the Rix1 complex (Rix1p-Ipi1p-Ipi3p) and possibly pre-replicative complexes (pre-RCs); required for processing of ITS2 sequences from 35S pre-rRNA; component of the pre-60S ribosomal particle with the dynein-related AAA-type ATPase Mdn1p; required for pre-RC formation and maintenance during DNA replication licensing; RIX1 is an essential gene
Sbay_12.152	0.998115	0.64766	YJR063W	RPA12	1.54402	1	RNA polymerase I subunit A12.2; contains two zinc binding domains, and the N terminal domain is responsible for anchoring to the RNA pol I complex
Sbay_7.199	0.990546	0.64851	YGL070C	RPB9	1.542	1	RNA polymerase II subunit B12.6; contacts DNA; mutations affect transcription start site selection and fidelity of transcription
Sbay_10.104	1	0.648633	YLR023C	IZH3	1.5417	1	Membrane protein involved in zinc ion homeostasis, member of the four-protein IZH family, expression induced by zinc deficiency; deletion reduces sensitivity to elevated zinc and shortens lag phase, overexpression reduces Zap1p activity
Sbay_13.444	1	0.649092	YMR260C	TIF11	1.54061	1	Translation initiation factor eIF1A, essential protein that forms a complex with Sui1p (eIF1) and the 40S ribosomal subunit and scans for the start codon; C-terminus associates with Fun12p (eIF5B); N terminus interacts with eIF2 and eIF3
Sbay_8.285	1	0.649124	YOR234C	RPL33B	1.54054	2.71127	Ribosomal 60S subunit protein L33B; rpl33b null mutant exhibits normal growth while rpl33a rpl33b double null mutant is inviable; homologous to mammalian ribosomal protein L35A, no bacterial homolog; RPL33B has a paralog, RPL33A, that arose from the whole genome duplication
Sbay_8.392	1	0.649342	YOR342C		1.54002	1.99957	Protein of unknown function; green fluorescent protein (GFP)-fusion protein localizes to the cytoplasm and the nucleus; relocalizes from nucleus to cytoplasm upon DNA replication stress; YOR342C has a paralog, YAL037W, that arose from the whole genome duplication
Sbay_15.253	1	0.649361	YHR064C	SSZ1	1.53998	2.04005	Hsp70 protein that interacts with Zuo1p (a DnaJ homolog) to form a ribosome-associated complex that binds the ribosome via the Zuo1p subunit; also involved in pleiotropic drug resistance via sequential activation of PDR1 and PDR5; binds ATP
Sbay_10.108	1	0.649799	YLR027C	AAT2	1.53894	1	Cytosolic aspartate aminotransferase, involved in nitrogen metabolism; localizes to peroxisomes in oleate-grown cells
Sbay_15.137	1	0.650029	YOL030W	GAS5	1.53839	1	1,3-beta-glucanosyltransferase, has similarity to Gas1p; localizes to the cell wall
Sbay_13.28	0.993273	0.650153	YML115C	VAN1	1.5381	1	Component of the mannan polymerase I, which contains Van1p and Mnn9p and is involved in the first steps of mannan synthesis; mutants are vanadate-resistant
Sbay_16.129	1	0.651611	YPL179W	PPQ1	1.53466	1	Putative protein serine/threonine phosphatase; null mutation enhances efficiency of translational suppressors
Sbay_10.55	1	0.651749	YLL019C	KNS1	1.53433	1	Protein kinase involved in negative regulation of PolIII transcription; effector kinase of the TOR signaling pathway and phosphorylates Rpc53p to regulate ribosome and tRNA biosynthesis; member of the LAMMER family of protein kinases, which are serine/threonine kinases also capable of phosphorylating tyrosine residues; capable of autophosphorylation
Sbay_13.258	1	0.651998	YMR079W	SEC14	1.53375	1	Phosphatidylinositol/phosphatidylcholine transfer protein; involved in regulating PtdIns, PtdCho, and ceramide metabolism, products of which regulate intracellular transport and UPR; has a role in localization of lipid raft proteins; functionally homologous to mammalian PITPs
Sbay_11.49	0.988329	0.652299	YKL174C	TPO5	1.53304	1	Protein involved in excretion of putrescine and spermidine; putative polyamine transporter in the Golgi or post-Golgi vesicles
Sbay_12.203	0.988067	0.652596	YJR112W	NNF1	1.53234	1	Essential component of the MIND kinetochore complex (Mtw1p Including Nnf1p-Nsl1p-Dsn1p) which joins kinetochore subunits contacting DNA to those contacting microtubules; required for accurate chromosome segregation
Sbay_7.133	0.99846	0.653261	YGL130W	CEG1	1.53078	1	Alpha (guanylyltransferase) subunit of the mRNA capping enzyme, a heterodimer (the other subunit is CET1, an RNA 5'-triphosphatase) involved in adding the 5' cap to mRNA; the mammalian enzyme is a single bifunctional polypeptide
Sbay_1.13	1	0.653607	YAL053W	FLC2	1.52997	1	Putative FAD transporter; required for uptake of FAD into endoplasmic reticulum; involved in cell wall maintenance; FLC2 has a paralog, YOR365C, that arose from the whole genome duplication
Sbay_7.376	0.992226	0.654145	YGR093W		1.52871	1	Putative protein of unconfirmed function; green fluorescent protein (GFP)-fusion protein localizes to the nucleus
Sbay_12.104	1	0.654195	NA	NA	1.5286	2.29891	NA
Sbay_2.319	0.998034	0.654658	YDR156W	RPA14	1.52751	2.56709	RNA polymerase I subunit A14
Sbay_15.23	0.999997	0.655027	YOL137W	BSC6	1.52665	1	Protein of unknown function containing 8 putative transmembrane seqments; ORF exhibits genomic organization compatible with a translational readthrough-dependent mode of expression
Sbay_14.381	0.999978	0.655348	YNR027W	BUD17	1.52591	1	Putative pyridoxal kinase, a key enzyme in vitamin B6 metabolism; involved in bud-site selection; diploid mutants display a random rather than a bipolar budding pattern; similarity to yeast BUD16 and human pyridoxal kinase (PDXK)
Sbay_7.96	1	0.655846	YGL167C	PMR1	1.52475	0.768331	High affinity Ca2+/Mn2+ P-type ATPase required for Ca2+ and Mn2+ transport into Golgi; involved in Ca2+ dependent protein sorting and processing; mutations in human homolog ATP2C1 cause acantholytic skin condition Hailey-Hailey disease
Sbay_2.668	0.999952	0.65612	YDR492W	IZH1	1.52411	1	Membrane protein involved in zinc ion homeostasis, member of the four-protein IZH family; transcription is regulated directly by Zap1p, expression induced by zinc deficiency and fatty acids; deletion increases sensitivity to elevated zinc
Sbay_9.32	0.999935	0.656853	YIL155C	GUT2	1.52241	1	Mitochondrial glycerol-3-phosphate dehydrogenase; expression is repressed by both glucose and cAMP and derepressed by non-fermentable carbon sources in a Snf1p, Rsf1p, Hap2/3/4/5 complex dependent manner
Sbay_15.43	0.999182	0.656875	YOL116W	MSN1	1.52236	1	Transcriptional activator; involved in regulation of invertase and glucoamylase expression, invasive growth and pseudohyphal differentiation, iron uptake, chromium accumulation, and response to osmotic stress; localizes to the nucleus; relative distribution to the nucleus increases upon DNA replication stress
Sbay_16.226	1	0.657206	YPL086C	ELP3	1.52159	1.7957	Subunit of Elongator complex, which is required for modification of wobble nucleosides in tRNA; exhibits histone acetyltransferase activity that is directed to histones H3 and H4; disruption confers resistance to K. lactis zymotoxin
Sbay_11.207	0.999811	0.659407	YKL020C	SPT23	1.51651	1	ER membrane protein involved in regulation of OLE1 transcription, acts with homolog Mga2p; inactive ER form dimerizes and one subunit is then activated by ubiquitin/proteasome-dependent processing followed by nuclear targeting
Sbay_13.246	0.999922	0.659446	YMR070W	MOT3	1.51642	1	Transcriptional repressor and activator with two C2-H2 zinc fingers; involved in repression of a subset of hypoxic genes by Rox1p, repression of several DAN/TIR genes during aerobic growth, and repression of ergosterol biosynthetic genes in response to hyperosmotic stress; contributes to recruitment of the Tup1p-Cyc8p general repressor to promoters; involved in positive transcriptional regulation…
Sbay_11.257	1	0.659549	YKR025W	RPC37	1.51619	1.8015	RNA polymerase III subunit C37
Sbay_13.143	0.96488	0.660519	YML016C	PPZ1	1.51396	1	Serine/threonine protein phosphatase Z, isoform of Ppz2p; involved in regulation of potassium transport, which affects osmotic stability, cell cycle progression, and halotolerance
Sbay_4.8	0.999959	0.663749	YDL236W	PHO13	1.50659	1	Alkaline phosphatase specific for p-nitrophenyl phosphate; also has protein phosphatase activity
Sbay_10.299	0.999999	0.664	YLR205C	HMX1	1.50602	0.257854	ER localized heme oxygenase, involved in heme degradation during iron starvation and in the oxidative stress response; expression is regulated by AFT1 and oxidative stress; relocates to the perinuclear region in the presence of oxidants
Sbay_10.288	1	0.664589	YLR192C	HCR1	1.50469	1	Dual function protein involved in translation initiation as a substoichiometric component (eIF3j) of translation initiation factor 3 (eIF3) and required for processing of 20S pre-rRNA; binds to eIF3 subunits Rpg1p and Prt1p and 18S rRNA
Sbay_7.209	0.998338	0.665682	YGL062W	PYC1	1.50222	1	Pyruvate carboxylase isoform; cytoplasmic enzyme that converts pyruvate to oxaloacetate; differentially regulated than isoform Pyc2p; mutations in the human homolog are associated with lactic acidosis; PYC1 has a paralog, PYC2, that arose from the whole genome duplication
Sbay_3.4	0.999985	0.666232	YCL017C	NFS1	1.50098	1.35651	Cysteine desulfurase involved in iron-sulfur cluster (Fe/S) biogenesis and in thio-modification of mitochondrial and cytoplasmic tRNAs; essential protein located predominantly in mitochondria
Sbay_16.331	1	0.666819	YPR010C	RPA135	1.49966	1.9706	RNA polymerase I second largest subunit A135
Sbay_4.307	0.999993	0.666943	YBR068C	BAP2	1.49938	2.07498	High-affinity leucine permease; functions as a branched-chain amino acid permease involved in uptake of leucine, isoleucine and valine; contains 12 predicted transmembrane domains; BAP2 has a paralog, BAP3, that arose from the whole genome duplication
Sbay_16.85	0.999974	0.667794	YPL221W	FLC1	1.49747	0.718662	Putative FAD transporter; required for uptake of FAD into endoplasmic reticulum; involved in cell wall maintenance
Sbay_7.77	0.999995	0.668335	YGL186C	TPN1	1.49626	1	Plasma membrane pyridoxine (vitamin B6) transporter; member of the purine-cytosine permease subfamily within the major facilitator superfamily; proton symporter with similarity to Fcy21p, Fcy2p, and Fcy22p
Sbay_4.179	0.99944	0.668384	YDL070W	BDF2	1.49615	1	Protein involved in transcription initiation; acts at TATA-containing promoters; associates with the basal transcription factor TFIID; contains two bromodomains; corresponds to the C-terminal region of mammalian TAF1; redundant with Bdf1p; protein abundance increases in response to DNA replication stress
Sbay_10.394	1	0.668396	YLR300W	EXG1	1.49612	0.61916	Major exo-1,3-beta-glucanase of the cell wall, involved in cell wall beta-glucan assembly; exists as three differentially glycosylated isoenzymes
Sbay_2.552	0.996522	0.668783	YDR379W	RGA2	1.49525	1	GTPase-activating protein for the polarity-establishment protein Cdc42p; implicated in control of septin organization, pheromone response, and haploid invasive growth; regulated by Pho85p and Cdc28p
Sbay_15.257	1	0.668802	YHR068W	DYS1	1.49521	1	Deoxyhypusine synthase, catalyzes formation of deoxyhypusine, the first step in hypusine biosynthesis; triggers posttranslational hypusination of translation elongation factor eIF-5A and regulates its intracellular levels; tetrameric
Sbay_16.519	0.999993	0.669319	YPR187W	RPO26	1.49406	1.69146	RNA polymerase subunit ABC23, common to RNA polymerases I, II, and III; part of central core; similar to bacterial omega subunit
Sbay_7.486	1	0.670289	YGR192C	TDH3	1.49189	1	Glyceraldehyde-3-phosphate dehydrogenase, isozyme 3; involved in glycolysis and gluconeogenesis; tetramer that catalyzes the reaction of glyceraldehyde-3-phosphate to 1,3 bis-phosphoglycerate; detected in the cytoplasm and cell wall; TDH3 has a paralog, TDH2, that arose from the whole genome duplication
Sbay_4.189	1	0.670797	YDL060W	TSR1	1.49076	2.74424	Protein required for processing of 20S pre-rRNA in the cytoplasm; associates with pre-40S ribosomal particles; inhibits the premature association of 60S subunits with assembling 40S subunits in the cytoplasm; similar to Bms1p; relocalizes from nucleus to cytoplasm upon DNA replication stress
Sbay_4.328	1	0.671421	YBR084W	MIS1	1.48938	1.83423	Mitochondrial C1-tetrahydrofolate synthase, involved in interconversion between different oxidation states of tetrahydrofolate (THF); provides activities of formyl-THF synthetase, methenyl-THF cyclohydrolase, and methylene-THF dehydrogenase
Sbay_14.159	1	0.671704	YNL182C	IPI3	1.48875	2.49615	Component of the Rix1 complex (Rix1p-Ipi1p-Ipi3p) and pre-replicative complexes (pre-RCs); required for processing of ITS2 sequences from 35S pre-rRNA; component of the pre-60S ribosomal particle with the dynein-related AAA-type ATPase Mdn1p; required for pre-RC formation and maintenance during DNA replication licensing; highly conserved protein which contains several WD40 motifs; IPI3 is an esse…
Sbay_2.331	0.999956	0.671848	YDR167W	TAF10	1.48843	1	Subunit (145 kDa) of TFIID and SAGA complexes, involved in RNA polymerase II transcription initiation and in chromatin modification
Sbay_11.220	1	0.672628	YKL008C	LAC1	1.48671	0.706944	Ceramide synthase component, involved in synthesis of ceramide from C26(acyl)-coenzyme A and dihydrosphingosine or phytosphingosine, functionally equivalent to Lag1p
Sbay_14.26	0.995941	0.672792	YNL313C	EMW1	1.48634	1	Essential conserved protein with a role in cell wall integrity; contains six TPR (tetratricopeptide repeat) domains clustered in the C-terminal region; conditional mutant is suppressed by overexpression of GFA1; protein abundance increases in response to DNA replication stress
Sbay_7.365	1	0.672834	YGR083C	GCD2	1.48625	1.5291	Delta subunit of the translation initiation factor eIF2B, the guanine-nucleotide exchange factor for eIF2; activity subsequently regulated by phosphorylated eIF2; first identified as a negative regulator of GCN4 expression
Sbay_7.314	1	0.67401	YGR032W	GSC2	1.48366	1	Catalytic subunit of 1,3-beta-glucan synthase, involved in formation of the inner layer of the spore wall; activity positively regulated by Rho1p and negatively by Smk1p; has similarity to an alternate catalytic subunit, Fks1p (Gsc1p)
Sbay_10.360	1	0.674805	YLR262C-A	TMA7	1.48191	1	Protein of unknown that associates with ribosomes; null mutant exhibits translation defects, altered polyribosome profiles, and resistance to the translation inhibitor anisomcyin; protein abundance increases in response to DNA replication stress
Sbay_14.255	0.998718	0.675166	YNL084C	END3	1.48112	1	EH domain-containing protein involved in endocytosis, actin cytoskeletal organization and cell wall morphogenesis; forms a complex with Sla1p and Pan1p
Sbay_7.582	1	0.675947	YGR285C	ZUO1	1.47941	2.11034	Ribosome-associated chaperone, functions in ribosome biogenesis and, in partnership with Ssz1p and SSb1/2, as a chaperone for nascent polypeptide chains; contains a DnaJ domain and functions as a J-protein partner for Ssb1p and Ssb2p
Sbay_15.370	1	0.676824	YHR170W	NMD3	1.47749	1	Protein involved in nuclear export of the large ribosomal subunit; acts as a Crm1p-dependent adapter protein for export of nascent ribosomal subunits through the nuclear pore complex
Sbay_8.320	1	0.677277	YOR271C	FSF1	1.4765	1	Putative protein, predicted to be an alpha-isopropylmalate carrier; belongs to the sideroblastic-associated protein family; non-tagged protein is detected in purified mitochondria; likely to play a role in iron homeostasis
Sbay_2.379	0.999938	0.677326	YDR211W	GCD6	1.47639	1	Catalytic epsilon subunit of the translation initiation factor eIF2B; eIF2B is the guanine-nucleotide exchange factor for eIF2; activity subsequently regulated by phosphorylated eIF2; first identified as a negative regulator of GCN4 expression; forms cytoplasmic foci upon DNA replication stress
Sbay_4.126	0.996615	0.67743	YDL121C		1.47617	1	Putative protein of unknown function; green fluorescent protein (GFP)-fusion protein localizes to the endoplasmic reticulum; YDL121C is not an essential protein
Sbay_11.298	0.995518	0.677976	YKR063C	LAS1	1.47498	1	Protein required for pre-rRNA processing at both ends of ITS2; may coordinate the action of the Rat1p-Rai1p exoRNAse; required for the G1/S transition of the cell cycle; human ortholog is Las1L; mutants require the SSD1-v allele for viability
Sbay_10.457	0.980965	0.678371	YLR356W	ATG33	1.47412	1	Mitochondrial mitophagy-specific protein; required primarily for mitophagy induced at the post-log phase; not required for other types of selective autophagy or macroautophagy; conserved within fungi, but not in higher eukaryotes
Sbay_13.270	0.999994	0.679135	YMR093W	UTP15	1.47246	1.76912	Nucleolar protein, component of the small subunit (SSU) processome containing the U3 snoRNA that is involved in processing of pre-18S rRNA
Sbay_7.564	1	0.679723	YGR267C	FOL2	1.47119	1	GTP-cyclohydrolase I, catalyzes the first step in the folic acid biosynthetic pathway
Sbay_8.24	0.999999	0.68206	YHL027W	RIM101	1.46615	1	Cys2His2 zinc-finger transcriptional repressor; involved in alkaline responsive gene repression as part of adaptation to a alkaline conditions; involved in cell wall assembly; required for alkaline pH-stimulated haploid invasive growth and sporulation; activated by alkaline-dependent proteolytic processing which results in removal of the C-terminal tail; similar to A. nidulans PacC
Sbay_14.45	0.969989	0.682762	YNL294C	RIM21	1.46464	1	pH sensor molecule, component of the RIM101 pathway; has a role in cell wall construction and alkaline pH response; is glycosylated and phosphorylated; interacts with Dfg16p and Rim9p to form a pH-sensing complex; localization to the plasma membrane is dependent on Dfg16p and Rim9p; has similarity to A. nidulans PalH
Sbay_4.19	0.960905	0.683531	YDL225W	SHS1	1.46299	1	Component of the septin ring that is required for cytokinesis; septins are GTP-binding proteins that assemble into rod-like hetero-oligomers that can associate with other rods to form filaments; septin rings at the mother-bud neck act as scaffolds for recruiting cell division factors and as barriers to prevent diffusion of specific proteins; undergoes sumoylation and phosphorylation during mitosi…
Sbay_13.137	1	0.684798	YML022W	APT1	1.46028	4.35829	Adenine phosphoribosyltransferase; catalyzes the formation of AMP from adenine and 5-phosphoribosylpyrophosphate; involved in the salvage pathway of purine nucleotide biosynthesis; APT1 has a paralog, APT2, that arose from the whole genome duplication
Sbay_7.378	0.999987	0.685143	Anc_3.434	NA	1.45955	0.657741	NA
Sbay_10.223	0.998299	0.685889	YLR130C	ZRT2	1.45796	0.746279	Low-affinity zinc transporter of the plasma membrane; transcription is induced under low-zinc conditions by the Zap1p transcription factor
Sbay_16.291	1	0.686269	YPL026C	SKS1	1.45715	1	Putative serine/threonine protein kinase; involved in the adaptation to low concentrations of glucose independent of the SNF3 regulated pathway
Sbay_9.138	1	0.686839	YIL063C	YRB2	1.45595	1	Protein of unknown function involved in nuclear processes of the Ran-GTPase cycle; involved in nuclear protein export; contains Ran Binding Domain and FxFG repeats; interacts with Srm1p, GTP-Gsp1p, Rna1p and Crm1p; is not essential
Sbay_9.154	1	0.688981	YIL046W	MET30	1.45142	1	F-box protein containing five copies of the WD40 motif, controls cell cycle function, sulfur metabolism, and methionine biosynthesis as part of the ubiquitin ligase complex; interacts with and regulates Met4p, localizes within the nucleus
Sbay_2.321	1	0.689803	YDR158W	HOM2	1.44969	1.93956	Aspartic beta semi-aldehyde dehydrogenase, catalyzes the second step in the common pathway for methionine and threonine biosynthesis; expression regulated by Gcn4p and the general control of amino acid synthesis
Sbay_9.181	1	0.689864	YIL019W	FAF1	1.44956	1	Protein required for pre-rRNA processing and 40S ribosomal subunit assembly
Sbay_7.525	0.999958	0.690052	YGR233C	PHO81	1.44917	1	Cyclin-dependent kinase (CDK) inhibitor; regulates Pho80p-Pho85p and Pcl7p-Pho85p cyclin-CDK complexes in response to phosphate levels; inhibitory activity for Pho80p-Pho85p requires myo-D-inositol heptakisphosphate (IP7) generated by Vip1p; relative distribution to the nucleus increases upon DNA replication stress
Sbay_15.151	0.997279	0.690453	YOL019W		1.44832	1	Protein of unknown function; green fluorescent protein (GFP)-fusion protein localizes to the cell periphery and vacuole; YOL019W has a paralog, DCV1, that arose from the whole genome duplication
Sbay_16.42	0.989223	0.690526	YPL263C	KEL3	1.44817	1.68101	Cytoplasmic protein of unknown function
Sbay_7.498	1	0.693493	YGR204W	ADE3	1.44197	1	Cytoplasmic trifunctional enzyme C1-tetrahydrofolate synthase, involved in single carbon metabolism and required for biosynthesis of purines, thymidylate, methionine, and histidine; null mutation causes auxotrophy for adenine and histidine
Sbay_15.148	0.982217	0.693541	YOL020W	TAT2	1.44188	1.93308	High affinity tryptophan and tyrosine permease, overexpression confers FK506 and FTY720 resistance
Sbay_8.51	0.999736	0.694596	YHL002W	HSE1	1.43969	1	Subunit of the endosomal Vps27p-Hse1p complex required for sorting of ubiquitinated membrane proteins into intralumenal vesicles prior to vacuolar degradation, as well as for recycling of Golgi proteins and formation of lumenal membranes
Sbay_11.43	1	0.695949	YKL181W	PRS1	1.43689	1.73984	5-phospho-ribosyl-1(alpha)-pyrophosphate synthetase, synthesizes PRPP, which is required for nucleotide, histidine, and tryptophan biosynthesis; one of five related enzymes, which are active as heteromultimeric complexes
Sbay_13.515	1	0.696313	NA	NA	1.43614	1	NA
Sbay_2.67	0.999989	0.696467	YBL051C	PIN4	1.43582	1	Protein involved in G2/M phase progression and response to DNA damage, interacts with Rad53p; contains an RNA recognition motif, a nuclear localization signal, and several SQ/TQ cluster domains; hyperphosphorylated in response to DNA damage
Sbay_11.75	0.957892	0.696565	YKL151C		1.43562	0.64885	NADHX dehydratase; converts (S)-NADHX to NADH in an ATP-dependent manner; homologous to Carkd in mammals, and the C-terminal domain of YjeF in E.coli; enzyme is widespread in eukaryotes, prokaryotes and archaea; YKL151C promoter contains STREs (stress response elements) and expression is induced by heat shock or methyl methanesulfonate; green fluorescent protein (GFP)-fusion protein localizes to …
Sbay_7.343	0.999982	0.696629	YGR061C	ADE6	1.43548	1	Formylglycinamidine-ribonucleotide (FGAM)-synthetase, catalyzes a step in the 'de novo' purine nucleotide biosynthetic pathway
Sbay_15.184	1	0.697558	YOR008C	SLG1	1.43357	1	Sensor-transducer of the stress-activated PKC1-MPK1 kinase pathway; involved in maintenance of cell wall integrity; required for mitophagy; involved in organization of the actin cytoskeleton; secretory pathway Wsc1p is required for the arrest of secretion response
Sbay_14.244	1	0.697974	YNL096C	RPS7B	1.43272	2.29116	Protein component of the small (40S) ribosomal subunit; interacts with Kti11p; deletion causes hypersensitivity to zymocin; homologous to mammalian ribosomal protein S7, no bacterial homolog; RPS7B has a paralog, RPS7A, that arose from the whole genome duplication; protein abundance increases in response to DNA replication stress
Sbay_14.234	0.999959	0.698014	NA	NA	1.43264	1	NA
Sbay_6.184	1	0.699235	YJL109C	UTP10	1.43013	1	Nucleolar protein, component of the small subunit (SSU) processome containing the U3 snoRNA that is involved in processing of pre-18S rRNA; mutant has increased aneuploidy tolerance
Sbay_10.54	1	0.699294	YLL021W	SPA2	1.43001	1	Component of the polarisome, which functions in actin cytoskeletal organization during polarized growth; acts as a scaffold for Mkk1p and Mpk1p cell wall integrity signaling components; potential Cdc28p substrate
Sbay_16.363	1	0.700808	YPR033C	HTS1	1.42692	1.50088	Cytoplasmic and mitochondrial histidine tRNA synthetase; efficient mitochondrial localization requires both a presequence and an amino-terminal sequence; mutations in human ortholog HARS2 are associated with Perrault syndrome
Sbay_10.514	0.962775	0.701704	YLR397C	AFG2	1.4251	1	ATPase of the CDC48/PAS1/SEC18 (AAA) family, forms a hexameric complex; is essential for pre-60S maturation and release of several preribosome maturation factors; releases Rlp24p from purified pre-60S particles in vitro; may be involved in degradation of aberrant mRNAs
Sbay_15.252	0.966604	0.701756	YHR063C	PAN5	1.425	1	2-dehydropantoate 2-reductase, part of the pantothenic acid pathway, structurally homologous to E. coli panE
Sbay_10.282	0.992434	0.702377	YLR186W	EMG1	1.42374	2.44086	Methyltransferase for rRNA; catalyzes methylation of the pseudouridine residue 1191 of 18S rRNA; member of the SPOUT methyltransferase family; required for maturation of 18S rRNA and for 40S ribosomal subunit production independently of methyltransferase activity; forms homodimers; human ortholog is mutated in Bowen-Conradi syndrome, and the equivalent mutation in yeast affects Emg1p dimerization…
Sbay_14.91	0.997297	0.703804	YNL251C	NRD1	1.42085	1	RNA-binding protein, subunit of Nrd1 complex (Nrd1p-Nab3p-Sen1p); complex interacts with the exosome to mediate 3&#8242; end formation of some mRNAs, snRNAs, snoRNAs, and CUTs; interacts with the C-terminal domain of the RNA polymerase II large subunit (Rpo21p), preferentially at phosphorylated Ser5, to direct transcription termination of non-polyadenylated transcripts; H3K4 trimethylation of tra…
Sbay_2.209	0.992372	0.704205	YDR051C	DET1	1.42004	1	Acid phosphatase involved in the non-vesicular transport of sterols in both directions between the endoplasmic reticulum and plasma membrane; deletion confers sensitivity to nickel
Sbay_4.267	0.999994	0.704874	YBR035C	PDX3	1.41869	1	Pyridoxine (pyridoxamine) phosphate oxidase, has homologs in E. coli and Myxococcus xanthus; transcription is under the general control of nitrogen metabolism
Sbay_2.519	0.986753	0.705073	YDR348C	PAL1	1.41829	1	Protein of unknown function thought to be involved in endocytosis; Pal1p physically interacts with Ede1p and is found at endocytic sites at the cell periphery during the early stages of endocytosis; green fluorescent protein (GFP)-fusion protein also localizes to the bud neck; potential Cdc28p substrate; similar to the S. pombe Pal1 protein; relocalizes from bud neck to cytoplasm upon DNA replica…
Sbay_16.69	1	0.705725	YPL237W	SUI3	1.41698	1.59943	Beta subunit of the translation initiation factor eIF2, involved in the identification of the start codon; proposed to be involved in mRNA binding
Sbay_9.54	0.997434	0.706622	YIL135C	VHS2	1.41518	1	Cytoplasmic protein of unknown function; identified as a high-copy suppressor of the synthetic lethality of a sis2 sit4 double mutant, suggesting a role in G1/S phase progression; similar to Mlf3p
Sbay_14.184	0.972246	0.70737	YNL155W		1.41369	1	Protein of unknown function; contains a DHHC domain and an AN1-type zinc finger; predicted to have thiol-disulfide oxidoreductase active site; transcriptionally regulated by Rpn4p along with proteasome subunit genes; putative ortholog of human AIRAP, which stimulates proteasome activity in response to arsenic; protein abundance increases in response to DNA replication stress
Sbay_10.109	1	0.708244	YLR028C	ADE16	1.41194	1	Enzyme of 'de novo' purine biosynthesis; contains both 5-aminoimidazole-4-carboxamide ribonucleotide transformylase and inosine monophosphate cyclohydrolase activities; ADE16 has a paralog, ADE17, that arose from the whole genome duplication; ade16 ade17 mutants require adenine and histidine
Sbay_10.376	0.997333	0.708901	YLR278C		1.41063	1	Zinc-cluster protein; GFP-fusion protein localizes to the nucleus; mutant shows moderate growth defect on caffeine; has a prion-domain like fragment that increases frequency of [URE3]; YLR278C is not an essential gene
Sbay_4.79	0.999999	0.709794	YDL167C	NRP1	1.40886	1	Putative RNA binding protein of unknown function; localizes to stress granules induced by glucose deprivation; predicted to be involved in ribosome biogenesis
Sbay_2.97	1	0.710385	YBL024W	NCL1	1.40769	1	S-adenosyl-L-methionine-dependent tRNA: m5C-methyltransferase, methylates cytosine to m5C at several positions in tRNAs and intron-containing pre-tRNAs; increases proportion of tRNALeu(CAA) with m5C at wobble position in response to hydrogen peroxide, causing selective translation of mRNA from genes enriched in TTG codon; loss of NCL1 confers hypersensitivity to oxidative stress; similar to Nop2p…
Sbay_5.18	1	0.71074	YEL051W	VMA8	1.40698	1	Subunit D of the eight-subunit V1 peripheral membrane domain of the vacuolar H+-ATPase (V-ATPase), an electrogenic proton pump found throughout the endomembrane system; plays a role in the coupling of proton transport and ATP hydrolysis
Sbay_3.17	0.999197	0.711609	YCL001W	RER1	1.40527	1	Protein involved in retention of membrane proteins, including Sec12p, in the ER; localized to Golgi; functions as a retrieval receptor in returning membrane proteins to the ER
Sbay_7.301	0.992978	0.712116	YGR020C	VMA7	1.40427	1	Subunit F of the eight-subunit V1 peripheral membrane domain of vacuolar H+-ATPase (V-ATPase), an electrogenic proton pump found throughout the endomembrane system; required for the V1 domain to assemble onto the vacuolar membrane
Sbay_16.196	0.999639	0.712397	YPL113C		1.40371	1	Glyoxylate reductase; acts on glyoxylate and hydroxypyruvate substrates; YPL113C is not an essential gene
Sbay_2.315	1	0.712678	YDR153C	ENT5	1.40316	1	Protein containing an N-terminal epsin-like domain involved in clathrin recruitment and traffic between the Golgi and endosomes; associates with the clathrin adaptor Gga2p, clathrin adaptor complex AP-1, and clathrin
Sbay_10.346	1	0.712734	YLR249W	YEF3	1.40305	2.00915	Gamma subunit of translational elongation factor eEF1B; stimulates the binding of aminoacyl-tRNA (AA-tRNA) to ribosomes by releasing eEF1A (Tef1p/Tef2p) from the ribosomal complex; contains two ABC cassettes; binds and hydrolyzes ATP; YEF3 has a paralog, HEF3, that arose from the whole genome duplication
Sbay_7.483	0.999828	0.713067	YGR189C	CRH1	1.40239	1	Chitin transglycosylase that functions in the transfer of chitin to beta(1-6) and beta(1-3) glucans in the cell wall; similar and functionally redundant to Utr2; localizes to sites of polarized growth; expression induced by cell wall stress
Sbay_10.525	1	0.713098	YLR409C	UTP21	1.40233	1	Subunit of U3-containing 90S preribosome and Small Subunit (SSU) processome complexes involved in production of 18S rRNA and assembly of small ribosomal subunit; synthetic defect with STI1 Hsp90 cochaperone; human homolog linked to glaucoma
Sbay_13.487	1	0.714269	YMR297W	PRC1	1.40003	1	Vacuolar carboxypeptidase Y (proteinase C; CPY), broad-specificity C-terminal exopeptidase involved in non-specific protein degradation in the vacuole; member of the serine carboxypeptidase family
Sbay_11.238	0.994372	0.716542	YKR007W	MEH1	1.39559	1	Component of the EGO complex, which is involved in the regulation of microautophagy, and of the GSE complex, which is required for proper sorting of amino acid permease Gap1p; loss results in a defect in vacuolar acidification
Sbay_8.293	0.999977	0.717305	YOR243C	PUS7	1.39411	1	Pseudouridine synthase, catalyzes pseudouridylation at positions 35 and 56 in U2 snRNA, position 50 in 5S rRNA, position 13 in cytoplasmic tRNAs, and position 35 in pre-tRNA(Tyr); conserved in archaea, vertebrates, and some bacteria
Sbay_16.128	0.98624	0.718373	YPL180W	TCO89	1.39203	1	Subunit of TORC1 (Tor1p or Tor2p-Kog1p-Lst8p-Tco89p), a complex that regulates growth in response to nutrient availability; cooperates with Ssd1p in the maintenance of cellular integrity; deletion strains are hypersensitive to rapamycin
Sbay_2.463	1	0.718724	YDR297W	SUR2	1.39135	1	Sphinganine C4-hydroxylase, catalyses the conversion of sphinganine to phytosphingosine in sphingolipid biosyntheis
Sbay_16.441	0.997131	0.720164	YPR113W	PIS1	1.38857	1	Phosphatidylinositol synthase, required for biosynthesis of phosphatidylinositol, which is a precursor for polyphosphoinositides, sphingolipids, and glycolipid anchors for some of the plasma membrane proteins
Sbay_10.128	0.99936	0.720668	YLR044C	PDC1	1.3876	1	Major of three pyruvate decarboxylase isozymes, key enzyme in alcoholic fermentation, decarboxylates pyruvate to acetaldehyde; subject to glucose-, ethanol-, and autoregulation; involved in amino acid catabolism
Sbay_13.72	0.999936	0.720933	YML080W	DUS1	1.38709	3.42592	Dihydrouridine synthase, member of a widespread family of conserved proteins including Smm1p, Dus3p, and Dus4p; modifies pre-tRNA(Phe) at U17
Sbay_15.283	0.999981	0.723689	YHR089C	GAR1	1.38181	2.57293	Protein component of the H/ACA snoRNP pseudouridylase complex, involved in the modification and cleavage of the 18S pre-rRNA
Sbay_10.191	1	0.725827	YLR106C	MDN1	1.37774	2.38602	Huge dynein-related AAA-type ATPase (midasin), forms extended pre-60S particle with the Rix1 complex (Rix1p-Ipi1p-Ipi3p); acts in removal of ribosomal biogenesis factors at successive steps of pre-60S assembly and export from nucleus
Sbay_3.91	1	0.726584	YCR053W	THR4	1.3763	1.55597	Threonine synthase, conserved protein that catalyzes formation of threonine from O-phosphohomoserine; expression is regulated by the GCN4-mediated general amino acid control pathway
Sbay_2.314	0.999653	0.727042	YDR152W	GIR2	1.37544	1	Highly-acidic cytoplasmic RWD domain-containing protein of unknown function; forms a complex with Rbg2p; interacts with Rbg1p and Gcn1p; associates with translating ribosomes; putative intrinsically unstructured protein
Sbay_10.389	1	0.727294	YLR293C	GSP1	1.37496	1.87536	Ran GTPase, GTP binding protein (mammalian Ranp homolog) involved in the maintenance of nuclear organization, RNA processing and transport; regulated by Srm1p, Rna1p, Yrb1p, Yrb2p, Yrp4p, Yrb30p, Cse1p and Kap95p; yeast Gsp2p homolog
Sbay_7.473	1	0.727421	YGR180C	RNR4	1.37472	1	Ribonucleotide-diphosphate reductase (RNR) small subunit; the RNR complex catalyzes the rate-limiting step in dNTP synthesis and is regulated by DNA replication and DNA damage checkpoint pathways via localization of the small subunits; relocalizes from nucleus to cytoplasm upon DNA replication stress
Sbay_11.9	0.995269	0.72744	YKL211C	TRP3	1.37468	1	Indole-3-glycerol-phosphate synthase; forms bifunctional hetero-oligomeric anthranilate synthase:indole-3-glycerol phosphate synthase enzyme complex with Trp2p
Sbay_6.60	0.994821	0.727525	YFL001W	DEG1	1.37452	1	tRNA:pseudouridine synthase, introduces pseudouridines at position 38 or 39 in tRNA, important for maintenance of translation efficiency and normal cell growth, localizes to both the nucleus and cytoplasm; non-essential for viability
Sbay_15.269	1	0.727559	YHR077C	NMD2	1.37446	1	Protein involved in the nonsense-mediated mRNA decay (NMD) pathway; interacts with Nam7p and Upf3p; involved in telomere maintenance
Sbay_10.106	0.996287	0.727688	YLR025W	SNF7	1.37422	1	One of four subunits of the endosomal sorting complex required for transport III (ESCRT-III); involved in the sorting of transmembrane proteins into the multivesicular body (MVB) pathway; recruited from the cytoplasm to endosomal membranes
Sbay_10.489	0.995527	0.728302	YLR372W	SUR4	1.37306	1	Elongase, involved in fatty acid and sphingolipid biosynthesis; synthesizes very long chain 20-26-carbon fatty acids from C18-CoA primers; involved in regulation of sphingolipid biosynthesis
Sbay_16.71	0.983258	0.728455	YPL235W	RVB2	1.37277	1	ATP-dependent DNA helicase, also known as reptin; member of the AAA+ and RuvB protein families, similar to Rvb1p; conserved component of multiple complexes including the INO80 complex, the Swr1 complex, and the R2TP complex (Rvb1-Rvb2-Tah1-Pih1); involved in multiple processes such as chromatin remodeling, box C/D snoRNP assembly, and RNA polymerase II assembly
Sbay_14.249	1	0.728816	YNL091W	NST1	1.37209	1	Protein of unknown function, mediates sensitivity to salt stress; interacts physically with the splicing factor Msl1p and also displays genetic interaction with MSL1
Sbay_10.546	0.999999	0.729088	YLR430W	SEN1	1.37158	1	Presumed helicase and subunit of the Nrd1 complex (Nrd1p-Nab3p-Sen1p); complex interacts with the exosome to mediate 3' end formation of some mRNAs, snRNAs, snoRNAs, and CUTs; has a separate role in coordinating DNA replication with transcription, by associating with moving replication forks and preventing errors that occur when forks encounter transcribed regions; homolog of Senataxin, which is …
Sbay_7.256	0.996837	0.73028	YGL023C	PIB2	1.36934	1	Protein of unknown function; contains FYVE domain; similar to Fab1 and Vps27
Sbay_13.341	0.992981	0.7312	YMR162C	DNF3	1.36761	0.556939	Aminophospholipid translocase (flippase) that maintains membrane lipid asymmetry in post-Golgi secretory vesicles; localizes to the trans-Golgi network; likely involved in protein transport; type 4 P-type ATPase
Sbay_2.660	0.981957	0.732401	YDR486C	VPS60	1.36537	1	Cytoplasmic and vacuolar membrane protein involved in late endosome to vacuole transport; required for normal filament maturation during pseudohyphal growth; may function in targeting cargo proteins for degradation; interacts with Vta1p
Sbay_13.400	1	0.732402	NA	NA	1.36537	3.49684	NA
Sbay_16.206	1	0.732477	YPL106C	SSE1	1.36523	2.19531	ATPase component of the heat shock protein Hsp90 chaperone complex; binds unfolded proteins; member of the heat shock protein 70 (HSP70) family; localized to the cytoplasm; SSE1 has a paralog, SSE2, that arose from the whole genome duplication
Sbay_10.143	0.99922	0.733328	YLR059C	REX2	1.36365	1	3'-5' RNA exonuclease; involved in 3'-end processing of U4 and U5 snRNAs, 5S and 5.8S rRNAs, and RNase P and RNase MRP RNA; localized to mitochondria and null suppresses escape of mtDNA to nucleus in yme1 yme2 mutants; RNase D exonuclease
Sbay_7.61	1	0.733387	YGL202W	ARO8	1.36354	1.32017	Aromatic aminotransferase I, expression is regulated by general control of amino acid biosynthesis
Sbay_10.449	0.950212	0.733438	YLR348C	DIC1	1.36344	0.679091	Mitochondrial dicarboxylate carrier, integral membrane protein, catalyzes a dicarboxylate-phosphate exchange across the inner mitochondrial membrane, transports cytoplasmic dicarboxylates into the mitochondrial matrix
Sbay_8.276	1	0.733782	YOR224C	RPB8	1.3628	1	RNA polymerase subunit ABC14.5, common to RNA polymerases I, II, and III
Sbay_4.476	0.999979	0.734313	YBR218C	PYC2	1.36182	1.19255	Pyruvate carboxylase isoform; cytoplasmic enzyme that converts pyruvate to oxaloacetate; differentially regulated than isoform Pyc1p; mutations in the human homolog are associated with lactic acidosis; PYC2 has a paralog, PYC1, that arose from the whole genome duplication
Sbay_10.439	1	0.734846	YLR342W	FKS1	1.36083	1.10873	Catalytic subunit of 1,3-beta-D-glucan synthase, functionally redundant with alternate catalytic subunit Gsc2p; binds to regulatory subunit Rho1p; involved in cell wall synthesis and maintenance; localizes to sites of cell wall remodeling
Sbay_3.89	0.999899	0.734972	YCR051W		1.3606	2.28437	Putative protein of unknown function; green fluorescent protein (GFP)-fusion protein localizes to the cytoplasm and nucleus; contains ankyrin (Ank) repeats; YCR051W is not an essential gene
Sbay_6.55	0.997877	0.735291	YFL004W	VTC2	1.36001	0.714664	Subunit of the vacuolar transporter chaperone (VTC) complex involved in membrane trafficking, vacuolar polyphosphate accumulation, microautophagy and non-autophagic vacuolar fusion
Sbay_10.549	0.999994	0.735766	YLR432W	IMD3	1.35913	1	Inosine monophosphate dehydrogenase, catalyzes the first step of GMP biosynthesis, member of a four-gene family in S. cerevisiae, constitutively expressed
Sbay_8.92	0.997745	0.73605	YOR039W	CKB2	1.3586	1	Beta' regulatory subunit of casein kinase 2 (CK2), a Ser/Thr protein kinase with roles in cell growth and proliferation; CK2, comprised of CKA1, CKA2, CKB1 and CKB2, has many substrates including transcription factors and all RNA polymerase
Sbay_8.319	0.999992	0.737205	YOR270C	VPH1	1.35648	1	Subunit a of vacuolar-ATPase V0 domain; one of two isoforms (Vph1p and Stv1p); Vph1p is located in V-ATPase complexes of the vacuole while Stv1p is located in V-ATPase complexes of the Golgi and endosomes; relative distribution to the vacuolar membrane decreases upon DNA replication stress
Sbay_7.562	0.999762	0.737541	YGR264C	MES1	1.35586	1	Methionyl-tRNA synthetase, forms a complex with glutamyl-tRNA synthetase (Gus1p) and Arc1p, which increases the catalytic efficiency of both tRNA synthetases; also has a role in nuclear export of tRNAs
Sbay_15.62	0.999842	0.738278	YOL103W	ITR2	1.3545	1	Myo-inositol transporter with strong similarity to the major myo-inositol transporter Itr1p, member of the sugar transporter superfamily; expressed constitutively
Sbay_1.29	1	0.738524	YAL036C	RBG1	1.35405	2.39866	Member of the DRG family of GTP-binding proteins; associates with translating ribosomes; interacts with Tma46p, Ygr250cp, Gir2p and Yap1p via two-hybrid
Sbay_5.114	0.997647	0.74179	YER019C-A	SBH2	1.34809	1	Ssh1p-Sss1p-Sbh2p complex component, involved in protein translocation into the endoplasmic reticulum; homologous to Sbh1p
Sbay_13.402	0.988038	0.742435	NA	NA	1.34692	1	NA
Sbay_13.302	0.979063	0.742673	YMR123W	PKR1	1.34649	1	V-ATPase assembly factor; functions with other V-ATPase assembly factors in the ER to efficiently assemble the V-ATPase membrane sector (V0); protein abundance increases in response to DNA replication stress
Sbay_16.140	0.998543	0.744403	YPL170W	DAP1	1.34336	1	Heme-binding protein involved in regulation of cytochrome P450 protein Erg11p; damage response protein, related to mammalian membrane progesterone receptors; mutations lead to defects in telomeres, mitochondria, and sterol synthesis
Sbay_12.182	0.982953	0.745202	YJR094W-A	RPL43B	1.34192	2.16822	Ribosomal 60S subunit protein L43B; homologous to mammalian ribosomal protein L37A, no bacterial homolog; RPL43B has a paralog, RPL43A, that arose from the whole genome duplication; protein abundance increases in response to DNA replication stress
Sbay_16.443	0.993151	0.749246	YPR115W	RGC1	1.33468	1	Pleckstrin homology domain containing protein; proposed to function as a glycerol channel activator; green fluorescent protein (GFP)-fusion protein localizes to the cytoplasm; RGC1 has a paralog, ASK10, that arose from the whole genome duplication
Sbay_14.236	0.996472	0.749631	YNL103W	MET4	1.33399	1	Leucine-zipper transcriptional activator, responsible for the regulation of the sulfur amino acid pathway, requires different combinations of the auxiliary factors Cbf1p, Met28p, Met31p and Met32p
Sbay_15.179	0.995291	0.750397	YOR004W	UTP23	1.33263	2.90918	Component of the small subunit processome, involved in 40S ribosomal subunit biogenesis; interacts with snR30 and is required for dissociation of snR30 from large pre-ribosomal particles; has homology to PINc domain protein Fcf1p, although the PINc domain of Utp23p is not required for function; essential protein
Sbay_15.67	0.995879	0.75056	YOL098C		1.33234	1	Putative metalloprotease
Sbay_15.258	0.997357	0.752906	YHR069C	RRP4	1.32819	2.04796	Exosome non-catalytic core component; involved in 3'-5' RNA processing and degradation in both the nucleus and the cytoplasm; predicted to contain RNA binding domains; has similarity to human hRrp4p (EXOSC2)
Sbay_3.93	1	0.753572	YCR057C	PWP2	1.32701	2.20099	Conserved 90S pre-ribosomal component essential for proper endonucleolytic cleavage of the 35 S rRNA precursor at A0, A1, and A2 sites; contains eight WD-repeats; PWP2 deletion leads to defects in cell cycle and bud morphogenesis
Sbay_13.325	1	0.753713	YMR146C	TIF34	1.32677	1	eIF3i subunit of the core complex of translation initiation factor 3 (eIF3), which is essential for translation; stimulates rate of ribosomal scanning during translation reinitiation
Sbay_4.299	0.999598	0.754053	YDR037W	KRS1	1.32617	1.6124	Lysyl-tRNA synthetase
Sbay_16.474	1	0.75542	YPR145W	ASN1	1.32377	1.98483	Asparagine synthetase; catalyzes the synthesis of L-asparagine from L-aspartate in the asparagine biosynthetic pathway; ASN1 has a paralog, ASN2, that arose from the whole genome duplication
Sbay_5.230	0.999979	0.755771	YER110C	KAP123	1.32315	2.43221	Karyopherin beta, mediates nuclear import of ribosomal proteins prior to assembly into ribosomes and import of histones H3 and H4; localizes to the nuclear pore, nucleus, and cytoplasm; exhibits genetic interactions with RAI1
Sbay_2.575	0.992297	0.755813	YDR398W	UTP5	1.32308	2.1685	Subunit of U3-containing Small Subunit (SSU) processome complex involved in production of 18S rRNA and assembly of small ribosomal subunit
Sbay_5.42	1	0.756239	YEL027W	VMA3	1.32233	1	Proteolipid subunit of the vacuolar H(+)-ATPase V0 sector (subunit c; dicyclohexylcarbodiimide binding subunit); required for vacuolar acidification and important for copper and iron metal ion homeostasis
Sbay_12.160	0.997228	0.756683	YJR070C	LIA1	1.32156	3.90786	Deoxyhypusine hydroxylase; HEAT-repeat containing metalloenzyme that catalyzes hypusine formation; binds to and is required for the modification of Hyp2p (eIF5A); complements S. pombe mmd1 mutants defective in mitochondrial positioning; protein abundance increases in response to DNA replication stress
Sbay_16.522	0.955841	0.757052	YPR190C	RPC82	1.32091	1	RNA polymerase III subunit C82
Sbay_6.203	0.965562	0.757213	YJL124C	LSM1	1.32063	1	Lsm (Like Sm) protein; forms heteroheptameric complex (with Lsm2p, Lsm3p, Lsm4p, Lsm5p, Lsm6p, and Lsm7p) involved in degradation of cytoplasmic mRNAs; unlike most Sm-like proteins, Lsm1p requires both its SM-domain and C-terminal domain for RNA-binding; forms cytoplasmic foci upon DNA replication stress
Sbay_10.314	0.989751	0.757241	YLR220W	CCC1	1.32058	1.62455	Putative vacuolar Fe2+/Mn2+ transporter; suppresses respiratory deficit of yfh1 mutants, which lack the ortholog of mammalian frataxin, by preventing mitochondrial iron accumulation; relative distribution to the vacuole decreases upon DNA replication stress
Sbay_7.575	1	0.763117	NA	NA	1.31042	1	NA
Sbay_1.30	1	0.76517	YAL035W	FUN12	1.3069	1.59348	GTPase required for general translation initiation; promotes Met-tRNAiMet binding to ribosomes and ribosomal subunit joining; promotes GTP-dependent maturation of 18S rRNA by Nob1p; protein abundance increases in response to DNA replication stress; homolog of bacterial IF2
Sbay_10.380	0.95417	0.765627	YLR285W	NNT1	1.30612	1	S-adenosylmethionine-dependent methyltransferase; has a role in rDNA silencing and in lifespan determination
Sbay_15.218	1	0.768322	YHR032W	ERC1	1.30154	2.10872	Member of the multi-drug and toxin extrusion (MATE) family of the multidrug/oligosaccharidyl-lipid/polysaccharide (MOP) exporter superfamily; overproduction confers ethionine resistance and accumulation of S-adenosylmethionine
Sbay_14.38	0.999894	0.769792	YNL301C	RPL18B	1.29905	1.88733	Ribosomal 60S subunit protein L18B; homologous to mammalian ribosomal protein L18, no bacterial homolog; RPL18B has a paralog, RPL18A, that arose from the whole genome duplication
Sbay_4.255	1	0.770209	YDR002W	YRB1	1.29835	1.43582	Ran GTPase binding protein; involved in nuclear protein import and RNA export, ubiquitin-mediated protein degradation during the cell cycle; shuttles between the nucleus and cytoplasm; is essential; homolog of human RanBP1
Sbay_16.159	0.98287	0.77142	YPL151C	PRP46	1.29631	1	Member of the NineTeen Complex (NTC) that contains Prp19p and stabilizes U6 snRNA in catalytic forms of the spliceosome containing U2, U5, and U6 snRNAs
Sbay_8.385	1	0.772047	YOR335C	ALA1	1.29526	1.34053	Cytoplasmic and mitochondrial alanyl-tRNA synthetase, required for protein synthesis; point mutation (cdc64-1 allele) causes cell cycle arrest at G1; lethality of null mutation is functionally complemented by human homolog
Sbay_2.605	1	0.772608	YDR429C	TIF35	1.29432	1	eIF3g subunit of the core complex of translation initiation factor 3 (eIF3), which is essential for translation; stimulates resumption of ribosomal scanning during translation reinitiation
Sbay_7.505	0.996611	0.774801	YGR211W	ZPR1	1.29065	2.32646	Essential protein with two zinc fingers; present in the nucleus of growing cells but relocates to the cytoplasm in starved cells via a process mediated by Cpr1p; binds to translation elongation factor eEF-1 (Tef1p); relative distribution to the nucleus increases upon DNA replication stress
Sbay_4.262	0.963228	0.774884	YDR009W	GAL3	1.29052	1	Transcriptional regulator; involved in activation of the GAL genes in response to galactose; forms a complex with Gal80p to relieve Gal80p inhibition of Gal4p; binds galactose and ATP but does not have galactokinase activity; GAL3 has a paralog, GAL1, that arose from the whole genome duplication
Sbay_15.211	0.999999	0.77594	YHR025W	THR1	1.28876	1	Homoserine kinase, conserved protein required for threonine biosynthesis; expression is regulated by the GCN4-mediated general amino acid control pathway
Sbay_14.151	1	0.77676	YNL190W		1.2874	1	Hydrophilin essential in dessication-rehydration process; cell wall protein; contains a putative GPI-attachment site
Sbay_13.103	0.999976	0.77769	YML056C	IMD4	1.28586	2.32153	Inosine monophosphate dehydrogenase, catalyzes the first step of GMP biosynthesis, member of a four-gene family in S. cerevisiae, constitutively expressed
Sbay_5.27	0.999996	0.778498	YEL042W	GDA1	1.28452	0.6602	Guanosine diphosphatase located in the Golgi, involved in the transport of GDP-mannose into the Golgi lumen by converting GDP to GMP after mannose is transferred its substrate
Sbay_2.495	0.985389	0.77976	YDR324C	UTP4	1.28245	1	Subunit of U3-containing 90S preribosome and Small Subunit (SSU) processome complexes involved in production of 18S rRNA and assembly of small ribosomal subunit; member of t-Utp subcomplex involved with transcription of 35S rRNA transcript
Sbay_10.420	0.999982	0.78324	YLR325C	RPL38	1.27675	1	Ribosomal 60S subunit protein L38; homologous to mammalian ribosomal protein L38, no bacterial homolog
Sbay_4.117	0.999782	0.78404	YDL128W	VCX1	1.27545	1	Vacuolar membrane antiporter with Ca2+/H+ and K+/H+ exchange activity, involved in control of cytosolic Ca2+ and K+ concentrations; has similarity to sodium/calcium exchangers, including the bovine Na+/Ca2+,K+ antiporter
Sbay_4.368	1	0.784345	YBR121C	GRS1	1.27495	1.44394	Cytoplasmic and mitochondrial glycyl-tRNA synthase; ligates glycine to the cognate anticodon-bearing tRNA; transcription termination factor that may interact with the 3'-end of pre-mRNA to promote 3'-end formation; GRS1 has a paralog, GRS2, that arose from the whole genome duplication
Sbay_12.173	0.967483	0.784501	YJR085C		1.2747	1	Protein of unknown function; GFP-fusion protein is induced in response to the DNA-damaging agent MMS; the authentic, non-tagged protein is detected in highly purified mitochondria in high-throughput studies; protein abundance increases in response to DNA replication stress
Sbay_7.231	0.964481	0.785074	YGL044C	RNA15	1.27377	1	Component of the cleavage and polyadenylation factor I (CF I); CF 1, composed of the CF 1A complex (Rna14p, Rna15p, Clp1p, Pcf11p) and Hrp1, is involved in cleavage and polyadenylation of mRNA 3' ends; interacts with the A-rich polyadenylation signal in complex with Rna14p and Hrp1p; mutant displays reduced transcription elongation in the G-less-based run-on (GLRO) assay; required for gene looping
Sbay_4.199	0.999793	0.785667	YDL051W	LHP1	1.2728	3.91967	RNA binding protein required for maturation of tRNA and U6 snRNA precursors; acts as a molecular chaperone for RNAs transcribed by polymerase III; homologous to human La (SS-B) autoantigen
Sbay_15.411	0.999873	0.785713	YHR205W	SCH9	1.27273	1	AGC family protein kinase; functional ortholog of mammalian S6 kinase; phosphorylated by Tor1p and required for TORC1-mediated regulation of ribosome biogenesis, translation initiation, and entry into G0 phase; involved in transactivation of osmostress-responsive genes; regulates G1 progression, cAPK activity and nitrogen activation of the FGM pathway; integrates nutrient signals and stress signa…
Sbay_8.391	1	0.786556	YOR341W	RPA190	1.27136	1	RNA polymerase I largest subunit A190
Sbay_8.239	0.999967	0.786594	YLR287C-A	RPS30A	1.2713	1.98087	Protein component of the small (40S) ribosomal subunit; homologous to mammalian ribosomal protein S30, no bacterial homolog; RPS30A has a paralog, RPS30B, that arose from the whole genome duplication
Sbay_13.86	0.958589	0.789244	YML070W	DAK1	1.26703	0.655198	Dihydroxyacetone kinase, required for detoxification of dihydroxyacetone (DHA); involved in stress adaptation
Sbay_14.217	0.999521	0.791645	YNL123W	NMA111	1.26319	1.6098	Serine protease and general molecular chaperone; involved in response to heat stress and promotion of apoptosis; may contribute to lipid homeostasis; sequence similarity to the mammalian Omi/HtrA2 family of serine proteases
Sbay_16.493	1	0.791933	YPR163C	TIF3	1.26273	2.05	Translation initiation factor eIF-4B; contains an RNA recognition motif and binds to single-stranded RNA; has RNA annealing activity; interacts with Rps20p at the head of the 40S ribosomal subunit and alters the structure of the mRNA entry channel
Sbay_2.43	0.999997	0.794294	YBL076C	ILS1	1.25898	1	Cytoplasmic isoleucine-tRNA synthetase, target of the G1-specific inhibitor reveromycin A
Sbay_3.185	0.973911	0.800088	YCL028W	RNQ1	1.24986	1	[PIN(+)] prion, an infectious protein conformation that is generally an ordered protein aggregate
Sbay_10.159	0.999789	0.804162	YLR075W	RPL10	1.24353	2.50076	Ribosomal 60S subunit protein L10; responsible for joining the 40S and 60S subunits; regulates translation initiation; similar to members of the QM gene family; homologous to mammalian ribosomal protein L10 and bacterial L16; protein abundance increases in response to DNA replication stress; mutations in the human ortholog are associated with development of T-cell acute lymphoblastic leukemia and…
Sbay_1.68	0.997883	0.807126	YAL003W	EFB1	1.23896	1.96494	Translation elongation factor 1 beta; stimulates nucleotide exchange to regenerate EF-1 alpha-GTP for the next elongation cycle; part of the EF-1 complex, which facilitates binding of aminoacyl-tRNA to the ribosomal A site
Sbay_11.284	0.989183	0.810653	YKR050W	TRK2	1.23357	1	Component of the Trk1p-Trk2p potassium transport system; TRK2 has a paralog, TRK1, that arose from the whole genome duplication
Sbay_11.202	0.969223	0.811408	YKL024C	URA6	1.23243	1	Uridylate kinase, catalyzes the seventh enzymatic step in the de novo biosynthesis of pyrimidines, converting uridine monophosphate (UMP) into uridine-5'-diphosphate (UDP)
Sbay_8.66	0.999783	0.819101	YHR010W	RPL27A	1.22085	2.24094	Ribosomal 60S subunit protein L27A; homologous to mammalian ribosomal protein L27, no bacterial homolog; RPL27A has a paralog, RPL27B, that arose from the whole genome duplication
Sbay_10.566	0.999947	0.819889	YLR448W	RPL6B	1.21968	2.69533	Ribosomal 60S subunit protein L6B; binds 5.8S rRNA; homologous to mammalian ribosomal protein L6, no bacterial homolog; RPL6B has a paralog, RPL6A, that arose from the whole genome duplication
Sbay_15.15	0.992217	0.824945	YOL145C	CTR9	1.2122	1	Component of the Paf1p complex involved in transcription elongation; binds to and modulates the activity of RNA polymerases I and II; required for expression of a subset of genes, including cyclin genes; involved in SER3 repression by helping to maintain SRG1 transcription-dependent nucleosome occupancy; contains TPR repeats
Sbay_15.21	0.99987	0.825313	YOL139C	CDC33	1.21166	1.59384	mRNA cap binding protein and translation initiation factor eIF4E; the eIF4E-cap complex is responsible for mediating cap-dependent mRNA translation via interactions with translation initiation factor eIF4G (Tif4631p or Tif4632p); protein abundance increases in response to DNA replication stress; mutants are defective for adhesion and pseudohyphal growth
Sbay_7.171	0.964871	0.825516	YGL097W	SRM1	1.21136	1	Nucleotide exchange factor for Gsp1p, localizes to the nucleus, required for nucleocytoplasmic trafficking of macromolecules; suppressor of the pheromone response pathway; potentially phosphorylated by Cdc28p
Sbay_12.162	0.996784	0.826656	YJR072C	NPA3	1.20969	2.2837	Member of the conserved GPN-loop GTPase family; has a role in transport of RNA polymerase II to the nucleus; exhibits GTP-dependent binding to PolII; has ATPase activity; involved in sister chromatid cohesion; phosphorylated by the Pcl1p-Pho85p kinase complex; human homolog XAB1 interacts with human RNA polymerase II; protein abundance increases in response to DNA replication stress
Sbay_7.478	0.999952	0.839306	YGR185C	TYS1	1.19146	1.491	Cytoplasmic tyrosyl-tRNA synthetase; required for cytoplasmic protein synthesis; interacts with positions 34 and 35 of the tRNATyr anticodon; mutations in human ortholog YARS are associated with Charcot-Marie-Tooth (CMT) neuropathies; protein abundance increases in response to DNA replication stress
Sbay_4.510	0.992446	0.846615	YBR249C	ARO4	1.18117	3.00859	3-deoxy-D-arabino-heptulosonate-7-phosphate (DAHP) synthase; catalyzes the first step in aromatic amino acid biosynthesis and is feedback-inhibited by tyrosine or high concentrations of phenylalanine or tryptophan; relative distribution to the nucleus increases upon DNA replication stress
Sbay_8.150	0.991363	0.852137	NA	NA	1.17352	2.16855	NA
Sbay_5.164	0.955649	0.853559	YER056C-A	RPL34A	1.17156	2.81361	Ribosomal 60S subunit protein L34A; homologous to mammalian ribosomal protein L34, no bacterial homolog; RPL34A has a paralog, RPL34B, that arose from the whole genome duplication
Sbay_11.70	0.976374	0.870674	YKL156W	RPS27A	1.14854	2.54982	Protein component of the small (40S) ribosomal subunit; homologous to mammalian ribosomal protein S27, no bacterial homolog; RPS27A has a paralog, RPS27B, that arose from the whole genome duplication; protein abundance increases in response to DNA replication stress
Sbay_10.144	0.972499	0.902538	YLR060W	FRS1	1.10799	2.01388	Beta subunit of cytoplasmic phenylalanyl-tRNA synthetase, forms a tetramer with Frs2p to generate active enzyme; able to hydrolyze mis-aminoacylated tRNA-Phe, which could contribute to translational quality control
Sbay_2.46	0.998826	1.13135	YBL072C	RPS8A	0.883898	1.74977	Protein component of the small (40S) ribosomal subunit; homologous to mammalian ribosomal protein S8, no bacterial homolog; RPS8A has a paralog, RPS8B, that arose from the whole genome duplication
Sbay_5.118	0.979136	1.13722	YER023W	PRO3	0.87934	1	Delta 1-pyrroline-5-carboxylate reductase, catalyzes the last step in proline biosynthesis
Sbay_4.173	0.999994	1.13973	YDL075W	RPL31A	0.877402	2.25041	Ribosomal 60S subunit protein L31A; associates with karyopherin Sxm1p; loss of both Rpl31p and Rpl39p confers lethality; homologous to mammalian ribosomal protein L31, no bacterial homolog; RPL31A has a paralog, RPL31B, that arose from the whole genome duplication
Sbay_2.93	0.999976	1.15892	YBL027W	RPL19B	0.862872	2.0586	Ribosomal 60S subunit protein L19B; rpl19a and rpl19b single null mutations result in slow growth, while the double null mutation is lethal; homologous to mammalian ribosomal protein L19, no bacterial homolog; RPL19B has a paralog, RPL19A, that arose from the whole genome duplication
Sbay_10.132	0.998631	1.16363	YLR048W	RPS0B	0.859379	2.34758	Protein component of the small (40S) ribosomal subunit; RPS0B has a paralog, RPS0A, that arose from the whole genome duplication; required for maturation of 18S rRNA along with Rps0Ap; deletion of either RPS0 gene reduces growth rate, deletion of both genes is lethal; homologous to human ribosomal protein SA and bacterial S2
Sbay_4.352	0.999747	1.1853	YBR106W	PHO88	0.84367	1	Probable membrane protein, involved in phosphate transport; pho88 pho86 double null mutant exhibits enhanced synthesis of repressible acid phosphatase at high inorganic phosphate concentrations
Sbay_15.206	0.999785	1.18701	YHR021C	RPS27B	0.842455	2.12586	Protein component of the small (40S) ribosomal subunit; homologous to mammalian ribosomal protein S27, no bacterial homolog; RPS27B has a paralog, RPS27A, that arose from the whole genome duplication
Sbay_4.329	0.964487	1.18789	YBR084C-A	RPL19A	0.841829	2.23664	Ribosomal 60S subunit protein L19A; rpl19a and rpl19b single null mutations result in slow growth, while the double null mutation is lethal; homologous to mammalian ribosomal protein L19, no bacterial homolog; RPL19A has a paralog, RPL19B, that arose from the whole genome duplication
Sbay_4.317	1	1.19309	YBR078W	ECM33	0.838159	1	GPI-anchored protein of unknown function, has a possible role in apical bud growth; GPI-anchoring on the plasma membrane crucial to function; phosphorylated in mitochondria; similar to Sps2p and Pst1p
Sbay_9.146	0.991338	1.19684	YIL052C	RPL34B	0.835536	2.62402	Ribosomal 60S subunit protein L34B; homologous to mammalian ribosomal protein L34, no bacterial homolog; RPL34B has a paralog, RPL34A, that arose from the whole genome duplication
Sbay_4.525	0.951022	1.20884	YBR263W	SHM1	0.827242	2.38886	Mitochondrial serine hydroxymethyltransferase, converts serine to glycine plus 5,10 methylenetetrahydrofolate; involved in generating precursors for purine, pyrimidine, amino acid, and lipid biosynthesis; reverse reaction generates serine
Sbay_9.159	0.965191	1.21206	YIL041W	GVP36	0.825038	1	BAR domain-containing protein that localizes to both early and late Golgi vesicles; required for adaptation to varying nutrient concentrations, fluid-phase endocytosis, polarization of the actin cytoskeleton, and vacuole biogenesis
Sbay_7.247	0.999598	1.21519	YGL031C	RPL24A	0.822917	1.82366	Ribosomal 60S subunit protein L24A; not essential for translation but may be required for normal translation rate; homologous to mammalian ribosomal protein L24, no bacterial homolog; RPL24A has a paralog, RPL24B, that arose from the whole genome duplication
Sbay_2.139	0.999995	1.22094	YBR011C	IPP1	0.819043	1	Cytoplasmic inorganic pyrophosphatase (PPase), homodimer that catalyzes the rapid exchange of oxygens from Pi with water, highly expressed and essential for viability, active-site residues show identity to those from E. coli PPase
Sbay_8.257	0.99905	1.22676	YOR204W	DED1	0.815155	1	ATP-dependent DEAD (Asp-Glu-Ala-Asp)-box RNA helicase, required for translation initiation of all yeast mRNAs; mutations in human DEAD-box DBY are a frequent cause of male infertility
Sbay_4.375	0.999995	1.22746	YBR127C	VMA2	0.814687	1	Subunit B of the eight-subunit V1 peripheral membrane domain of the vacuolar H+-ATPase (V-ATPase), an electrogenic proton pump found throughout the endomembrane system; contains nucleotide binding sites; also detected in the cytoplasm; protein abundance increases in response to DNA replication stress
Sbay_4.211	0.978844	1.23061	YDL040C	NAT1	0.812608	1	Subunit of the N-terminal acetyltransferase NatA (Nat1p, Ard1p, Nat5p); N-terminally acetylates many proteins, which influences multiple processes such as the cell cycle, heat-shock resistance, mating, sporulation, and telomeric silencing
Sbay_4.194	0.994819	1.23628	YDL055C	PSA1	0.80888	1	GDP-mannose pyrophosphorylase (mannose-1-phosphate guanyltransferase), synthesizes GDP-mannose from GTP and mannose-1-phosphate in cell wall biosynthesis; required for normal cell wall structure
Sbay_4.104	1	1.23889	YDL140C	RPO21	0.807176	1	RNA polymerase II largest subunit B220, part of central core; phosphorylation of C-terminal heptapeptide repeat domain regulates association with transcription and splicing factors; similar to bacterial beta-prime
Sbay_6.23	0.996777	1.24143	YFL034C-A	RPL22B	0.805525	2.69848	Ribosomal 60S subunit protein L22B; homologous to mammalian ribosomal protein L22, no bacterial homolog; RPL22B has a paralog, RPL22A, that arose from the whole genome duplication
Sbay_4.202	0.995655	1.24272	YDL047W	SIT4	0.804684	1	Type 2A-related serine-threonine phosphatase that functions in the G1/S transition of the mitotic cycle; cytoplasmic and nuclear protein that modulates functions mediated by Pkc1p including cell wall and actin cytoskeleton organization
Sbay_2.399	0.978463	1.24319	YDR233C	RTN1	0.804385	1	Reticulon protein; stabilizes membrane curvature; involved in nuclear pore assembly and maintenance of tubular ER morphology; mutant overexpressing RTN1 shows increase in tubular ER; interacts with exocyst subunit Sec6p, Yip3p, and Sbh1p; more abundant than Rtn2p; member of the RTNLA subfamily; mutants have reduced phosphatidylserine transfer between the ER and mitochondria; RTN1 has a paralog, R…
Sbay_1.43	1	1.25077	YAL023C	PMT2	0.799506	1	Protein O-mannosyltransferase of the ER membrane; transfers mannose residues from dolichyl phosphate-D-mannose to protein serine/threonine residues; involved in ER quality control; acts in a complex with Pmt1p, can instead interact with Pmt5p; antifungal drug target; PMT2 has a paralog, PMT3, that arose from the whole genome duplication
Sbay_1.63	0.999907	1.25918	YAL005C	SSA1	0.79417	1.39551	ATPase involved in protein folding and NLS-directed nuclear transport; member of HSP70 family; forms chaperone complex with Ydj1p; localized to nucleus, cytoplasm, and cell wall; 98% identical with paralog Ssa2p, but subtle differences between the two proteins provide functional specificity with respect to propagation of yeast [URE3] prions and vacuolar-mediated degradations of gluconeogenesis en…
Sbay_9.157	0.999443	1.25977	YIL043C	CBR1	0.793798	1	Microsomal cytochrome b reductase, not essential for viability; also detected in mitochondria; mutation in conserved NADH binding domain of the human ortholog results in type I methemoglobinemia
Sbay_13.135	1	1.26463	YML024W	RPS17A	0.790742	1.76825	Ribosomal protein 51 (rp51) of the small (40s) subunit; homologous to mammalian ribosomal protein S17, no bacterial homolog; RPS17A has a paralog, RPS17B, that arose from the whole genome duplication
Sbay_16.279	1	1.26523	YPL037C	EGD1	0.79037	1	Subunit beta1 of the nascent polypeptide-associated complex (NAC) involved in protein targeting, associated with cytoplasmic ribosomes; enhances DNA binding of the Gal4p activator; homolog of human BTF3b
Sbay_5.35	1	1.26704	YEL034W	HYP2	0.789242	1	Translation elongation factor eIF-5A; may function in translation initiation; structural homolog of bacterial EF-P; undergoes an essential hypusination modification; HYP2 has a paralog, ANB1, that arose from the whole genome duplication
Sbay_12.238	0.986775	1.27428	YJR145C	RPS4A	0.784757	2.44217	Protein component of the small (40S) ribosomal subunit; mutation affects 20S pre-rRNA processing; homologous to mammalian ribosomal protein S4, no bacterial homolog; RPS4A has a paralog, RPS4B, that arose from the whole genome duplication
Sbay_8.350	0.993779	1.2752	YOR298C-A	MBF1	0.78419	1	Transcriptional coactivator; bridges the DNA-binding region of Gcn4p and TATA-binding protein Spt15p; suppressor of frameshift mutations; protein abundance increases in response to DNA replication stress
Sbay_12.193	0.976849	1.27677	YJR104C	SOD1	0.783227	1	Cytosolic copper-zinc superoxide dismutase; some mutations are analogous to those that cause ALS (amyotrophic lateral sclerosis) in humans; protein abundance increases in response to DNA replication stress and in response to prolonged exposure to boric acid
Sbay_5.109	0.998974	1.28053	YER017C	AFG3	0.780927	1	Component, with Yta12p, of the mitochondrial inner membrane m-AAA protease; mediates degradation of misfolded or unassembled proteins and is also required for correct assembly of mitochondrial enzyme complexes; involved in cytoplasmic mRNA translation and aging
Sbay_7.508	0.994397	1.28267	YGR214W	RPS0A	0.779621	2.31063	Ribosomal 40S subunit protein S0A; required for maturation of 18S rRNA along with Rps0Bp; deletion of either RPS0 gene reduces growth rate, deletion of both genes is lethal; homologous to human ribosomal protein SA and bacterial S2; RPS0A has a paralog, RPS0B, that arose from the whole genome duplication;
Sbay_6.264	0.951328	1.2852	YJL184W	GON7	0.778087	1	Component of the EKC/KEOPS protein complex with Kae1p, Cgi121p, Pcc1p, and Bud32p; EKC/KEOPS complex is required for t6A tRNA modification and may have roles in telomere maintenance and transcription; implicated in osmotic stress response
Sbay_16.234	0.999105	1.28697	YPL078C	ATP4	0.777021	1	Subunit b of the stator stalk of mitochondrial F1F0 ATP synthase, which is a large, evolutionarily conserved enzyme complex required for ATP synthesis; contributes to the oligomerization of the complex; phosphorylated
Sbay_7.8	0.991837	1.28786	YGL253W	HXK2	0.776483	2.98711	Hexokinase isoenzyme 2; catalyzes phosphorylation of glucose in the cytosol; predominant hexokinase during growth on glucose; functions in the nucleus to repress expression of HXK1 and GLK1 and to induce expression of its own gene; phosphorylation/dephosphorylation at serine-14 by protein kinase Snf1p and protein phosphatase Glc7p-Reg1p regulates nucleocytoplasmic shuttling of Hxk2p; HXK2 has a p…
Sbay_10.160	0.982478	1.29182	YLR077W	FMP25	0.774102	1.49398	Mitochondrial inner membrane protein required for an early step in assembly of respiratory complex III (cytochrome bc1 complex); mRNA is targeted to mitochondria
Sbay_16.109	0.999971	1.29321	YPL198W	RPL7B	0.773271	2.1314	Ribosomal 60S subunit protein L7B; contains a conserved C-terminal Nucleic acid Binding Domain (NDB2); homologous to mammalian ribosomal protein L7 and bacterial L30; RPL7B has a paralog, RPL7A, that arose from the whole genome duplication
Sbay_2.677	1	1.29499	YDR500C	RPL37B	0.772209	1.83514	Ribosomal 60S subunit protein L37B; protein abundance increases in response to DNA replication stress; homologous to mammalian ribosomal protein L37, no bacterial homolog; RPL37B has a paralog, RPL37A, that arose from the whole genome duplication
Sbay_12.167	0.975465	1.29592	YJR077C	MIR1	0.771651	1	Mitochondrial phosphate carrier, imports inorganic phosphate into mitochondria; functionally redundant with Pic2p but more abundant than Pic2p under normal conditions; phosphorylated
Sbay_15.404	0.998522	1.29791	YHR200W	RPN10	0.770472	1	Non-ATPase base subunit of the 19S regulatory particle (RP) of the 26S proteasome; N-terminus plays a role in maintaining the structural integrity of the RP; binds selectively to polyubiquitin chains; homolog of the mammalian S5a protein
Sbay_11.76	0.99883	1.29934	YKL150W	MCR1	0.769624	0.539464	Mitochondrial NADH-cytochrome b5 reductase, involved in ergosterol biosynthesis
Sbay_7.145	0.976692	1.30002	YGL123W	RPS2	0.76922	2.32691	Protein component of the small (40S) subunit; essential for control of translational accuracy; phosphorylation by C-terminal domain kinase I (CTDK-I) enhances translational accuracy; methylated on one or more arginine residues by Hmt1p; homologous to mammalian ribosomal protein S2 and bacterial S5
Sbay_6.200	0.9988	1.30348	YJL121C	RPE1	0.767177	1	D-ribulose-5-phosphate 3-epimerase, catalyzes a reaction in the non-oxidative part of the pentose-phosphate pathway; mutants are sensitive to oxidative stress
Sbay_10.281	1	1.30381	YLR185W	RPL37A	0.766982	2.28478	Ribosomal 60S subunit protein L37A; homologous to mammalian ribosomal protein L37, no bacterial homolog; RPL37A has a paralog, RPL37B, that arose from the whole genome duplication
Sbay_11.330	1	1.30708	YKR094C	RPL40B	0.765062	2.07176	Ubiquitin-ribosomal 60S subunit protein L40B fusion protein; cleaved to yield ubiquitin and ribosomal protein L40B; ubiquitin may facilitate assembly of the ribosomal protein into ribosomes; homologous to mammalian ribosomal protein L40, no bacterial homolog; RPL40B has a paralog, RPL40A, that arose from the whole genome duplication
Sbay_2.404	0.998175	1.30943	YDR238C	SEC26	0.763692	1	Essential beta-coat protein of the COPI coatomer, involved in ER-to-Golgi protein trafficking and maintenance of normal ER morphology; shares 43% sequence identity with mammalian beta-coat protein (beta-COP)
Sbay_9.161	0.968161	1.31103	YIL039W	TED1	0.762759	1	Conserved phosphoesterase domain-containing protein that acts together with Emp24p/Erv25p in cargo exit from the ER; deletion confers sensitivity to 4-(N-(S-glutathionylacetyl)amino) phenylarsenoxide (GSAO)
Sbay_10.57	1	1.31158	YLL018C	DPS1	0.76244	1	Aspartyl-tRNA synthetase, primarily cytoplasmic; homodimeric enzyme that catalyzes the specific aspartylation of tRNA(Asp); class II aminoacyl tRNA synthetase; binding to its own mRNA may confer autoregulation
Sbay_11.193	0.999728	1.31183	YKL032C	IXR1	0.762293	1	Protein that binds DNA containing intrastrand cross-links formed by cisplatin, contains two HMG (high mobility group box) domains, which confer the ability to bend cisplatin-modified DNA; mediates aerobic transcriptional repression of COX5b
Sbay_5.26	0.999996	1.31251	YEL043W		0.761898	1	Predicted cytoskeleton protein involved in intracellular signalling based on quantitative analysis of protein-protein interaction maps; may interact with ribosomes, based on co-purification studies; contains fibronectin type III domain fold
Sbay_5.246	0.999993	1.31447	YER125W	RSP5	0.760766	1	E3 ubiquitin ligase of the NEDD4 family; involved in regulating many cellular processes including MVB sorting, heat shock response, transcription, endocytosis, and ribosome stability; human homolog is involved in Liddle syndrome; mutant tolerates aneuploidy; ubiquitylates Sec23p
Sbay_10.279	0.952055	1.31493	YLR182W	SWI6	0.760499	1	Transcription cofactor; forms complexes with Swi4p and Mbp1p to regulate transcription at the G1/S transition; involved in meiotic gene expression; also binds Stb1p to regulate transcription at START; cell wall stress induces phosphorylation by Mpk1p, which regulates Swi6p localization; required for the unfolded protein response, independently of its known transcriptional coactivators
Sbay_11.282	1	1.31535	YKR048C	NAP1	0.760254	1	Protein that interacts with mitotic cyclin Clb2p; required for the regulation of microtubule dynamics during mitosis; controls bud morphogenesis; involved in the transport of H2A and H2B histones to the nucleus; phosphorylated by CK2; protein abundance increases in response to DNA replication stress
Sbay_7.194	0.999919	1.31884	YGL076C	RPL7A	0.758242	2.08722	Ribosomal 60S subunit protein L7A; contains a conserved C-terminal Nucleic acid Binding Domain (NDB2); homologous to mammalian ribosomal protein L7 and bacterial L30; RPL7A has a paralog, RPL7B, that arose from the whole genome duplication
Sbay_3.189	1	1.31995	YCL025C	AGP1	0.757604	1.57091	Low-affinity amino acid permease with broad substrate range; involved in uptake of asparagine, glutamine, and other amino acids; expression regulated by SPS plasma membrane amino acid sensor system (Ssy1p-Ptr3p-Ssy5p); AGP1 has a paralog, GNP1, that arose from the whole genome duplication
Sbay_7.225	0.997578	1.32285	YGL049C	TIF4632	0.755943	1	Translation initiation factor eIF4G, subunit of the mRNA cap-binding protein complex (eIF4F) that also contains eIF4E (Cdc33p); associates with the poly(A)-binding protein Pab1p, also interacts with eIF4A (Tif1p); TIF4632 has a paralog, TIF4631, that arose from the whole genome duplication
Sbay_4.297	0.997539	1.32408	YBR059C	AKL1	0.755242	1	Ser-Thr protein kinase, member (with Ark1p and Prk1p) of the Ark kinase family; involved in endocytosis and actin cytoskeleton organization
Sbay_6.271	0.994061	1.32812	YJL191W	RPS14B	0.752943	2.49898	Protein component of the small (40S) ribosomal subunit; required for ribosome assembly and 20S pre-rRNA processing; mutations confer cryptopleurine resistance; homologous to mammalian ribosomal protein S14 and bacterial S11; RPS14B has a paralog, RPS14A, that arose from the whole genome duplication
Sbay_4.409	0.968169	1.32841	YBR158W	AMN1	0.75278	1	Protein required for daughter cell separation, multiple mitotic checkpoints, and chromosome stability; contains 12 degenerate leucine-rich repeat motifs; expression is induced by the Mitotic Exit Network (MEN)
Sbay_3.155	0.967245	1.33797	YCL057C-A	MOS1	0.747398	1	Mitochondrial protein essential for proper inner membrane organization; conserved component of the mitochondrial inner membrane organizing system (MICOS, MINOS, or MitOS), a scaffold-like structure on the intermembrane space side of the inner membrane which has a role in the maintenance of crista junctions and inner membrane architecture; ortholog of human MINOS1
Sbay_4.479	1	1.33852	YBR222C	PCS60	0.747095	1	Peroxisomal protein that binds AMP and mRNA, localizes to both the peroxisomal peripheral membrane and matrix, expression is highly inducible by oleic acid, similar to E. coli long chain acyl-CoA synthetase
Sbay_11.315	0.958054	1.34186	YKR079C	TRZ1	0.745236	1	tRNA 3'-end processing endonuclease tRNase Z; also localized to mitochondria and interacts genetically with Rex2 exonuclease; homolog of the human candidate prostate cancer susceptibility gene ELAC2
Sbay_11.270	0.997883	1.34534	YKR038C	KAE1	0.743305	2.40594	Highly conserved ATPase of HSP70/DnaK family; component of the EKC/KEOPS complex with Bud32p, Cgi121p, Pcc1p, and Gon7p; EKC/KEOPS complex is required for t6A tRNA modification and may have roles in telomere maintenance and transcription
Sbay_2.504	0.999573	1.3529	YDR334W	SWR1	0.739152	1	Swi2/Snf2-related ATPase that is the structural component of the SWR1 complex, which exchanges histone variant H2AZ (Htz1p) for chromatin-bound histone H2A
Sbay_7.193	0.999958	1.35606	YGL077C	HNM1	0.73743	1.7173	Choline/ethanolamine transporter; involved in the uptake of nitrogen mustard and the uptake of glycine betaine during hypersaline stress; co-regulated with phospholipid biosynthetic genes and negatively regulated by choline and myo-inositol
Sbay_10.437	0.998688	1.36087	YLR340W	RPP0	0.734823	2.12485	Conserved ribosomal protein P0 of the ribosomal stalk; involved in interaction between translational elongation factors and the ribosome; phosphorylated on serine 302; homologous to mammalian ribosomal protein LP0 and bacterial L10
Sbay_14.68	0.982319	1.36394	YNL274C	GOR1	0.733167	1	Glyoxylate reductase; null mutation results in increased biomass after diauxic shift; the authentic, non-tagged protein is detected in highly purified mitochondria in high-throughput studies; protein abundance increases in response to DNA replication stress
Sbay_7.162	1	1.36508	YGL105W	ARC1	0.73256	1	Protein that binds tRNA and methionyl- and glutamyl-tRNA synthetases (Mes1p and Gus1p), delivering tRNA to them, stimulating catalysis, and ensuring their localization to the cytoplasm; also binds quadruplex nucleic acids; protein abundance increases in response to DNA replication stress
Sbay_4.146	1	1.36669	YDL100C	GET3	0.731693	1	Guanine nucleotide exchange factor for Gpa1p; amplifies G protein signaling; subunit of the GET complex, which is involved in Golgi to ER trafficking and insertion of proteins into the ER membrane; has low-level ATPase activity; protein abundance increases in response to DNA replication stress
Sbay_2.254	1	1.36739	YDR093W	DNF2	0.731323	1	Aminophospholipid translocase (flippase) that localizes primarily to the plasma membrane; contributes to endocytosis, protein transport and cell polarity; type 4 P-type ATPase
Sbay_3.170	1	1.36854	YCL043C	PDI1	0.730705	1	Protein disulfide isomerase; multifunctional protein of ER lumen, essential for formation of disulfide bonds in secretory and cell-surface proteins, unscrambles non-native disulfide bonds; key regulator of Ero1p; forms complex with Mnl1p that has exomannosidase activity, processing unfolded protein-bound Man8GlcNAc2 oligosaccharides to Man7GlcNAc2, promoting degradation in unfolded protein respon…
Sbay_11.331	0.999472	1.36911	YKR095W	MLP1	0.730399	1	Myosin-like protein associated with the nuclear envelope, connects the nuclear pore complex with the nuclear interior; involved with Tel1p in telomere length control; involved with Pml1p and Pml39p in nuclear retention of unspliced mRNAs
Sbay_7.197	0.988473	1.37239	YGL073W	HSF1	0.728657	1	Trimeric heat shock transcription factor, activates multiple genes in response to stresses that include hyperthermia; recognizes variable heat shock elements (HSEs) consisting of inverted NGAAN repeats; posttranslationally regulated
Sbay_10.165	1	1.37322	NA	NA	0.728216	1	GAL2B
Sbay_10.556	0.999331	1.37458	YLR438C-A	LSM3	0.727492	1	Lsm (Like Sm) protein; part of heteroheptameric complexes (Lsm2p-7p and either Lsm1p or 8p): cytoplasmic Lsm1p complex involved in mRNA decay; nuclear Lsm8p complex part of U6 snRNP and possibly involved in processing tRNA, snoRNA, and rRNA; protein increases in abundance and relocalizes from nucleus to cytoplasmic foci upon DNA replication stress
Sbay_6.76	0.996429	1.37623	YFR016C		0.726624	1	Putative protein of unknown function; green fluorescent protein (GFP)-fusion protein localizes to the cytoplasm and bud; interacts with Spa2p; YFL016C is not an essential gene
Sbay_13.496	0.984577	1.3767	YMR305C	SCW10	0.726376	1	Cell wall protein with similarity to glucanases; may play a role in conjugation during mating based on mutant phenotype and its regulation by Ste12p
Sbay_9.51	0.973913	1.37853	YIL138C	TPM2	0.725409	1	Minor isoform of tropomyosin; binds to and stabilizes actin cables and filaments, which direct polarized cell growth and the distribution of several organelles; appears to have distinct and also overlapping functions with Tpm1p; TPM2 has a paralog, TPM1, that arose from the whole genome duplication
Sbay_4.158	1	1.37886	YDL086W		0.725237	1	Putative carboxymethylenebutenolidase; the authentic, non-tagged protein is detected in highly purified mitochondria in high-throughput studies; YDL086W is not an essential gene
Sbay_8.59	0.975998	1.37944	YHR005C	GPA1	0.724933	1	Subunit of the G protein involved in pheromone response; GTP-binding alpha subunit of the heterotrimeric G protein; negatively regulates the mating pathway by sequestering G(beta)gamma and by triggering an adaptive response; activates Vps34p at the endosome; protein abundance increases in response to DNA replication stress
Sbay_7.161	0.976016	1.37947	YGL106W	MLC1	0.724918	1	Essential light chain for Myo1p, light chain for Myo2p; stabilizes Myo2p by binding to the neck region; interacts with Myo1p, Iqg1p, and Myo2p to coordinate formation and contraction of the actomyosin ring with targeted membrane deposition
Sbay_10.49	0.999178	1.38224	YLL024C	SSA2	0.723464	1.82306	ATP binding protein involved in protein folding and vacuolar import of proteins; member of heat shock protein 70 (HSP70) family; associated with the chaperonin-containing T-complex; present in the cytoplasm, vacuolar membrane and cell wall; 98% identical with paralog Ssa1p, but subtle differences between the two proteins provide functional specificity with respect to propagation of yeast [URE3] p…
Sbay_8.32	0.97984	1.38368	YHL020C	OPI1	0.72271	1.43475	Transcriptional regulator of a variety of genes; phosphorylation by protein kinase A stimulates Opi1p function in negative regulation of phospholipid biosynthetic genes; involved in telomere maintenance
Sbay_14.375	0.97615	1.3872	YNR020C	ATP23	0.720875	1	Putative metalloprotease of the mitochondrial inner membrane, required for processing of Atp6p; has an additional role in assembly of the F0 sector of the F1F0 ATP synthase complex; substrate of the Mia40p-Erv1p disulfide relay system, and folding is assisted by Mia40p
Sbay_15.396	1	1.38793	YHR193C	EGD2	0.720499	1	Alpha subunit of the heteromeric nascent polypeptide-associated complex (NAC) involved in protein sorting and translocation, associated with cytoplasmic ribosomes
Sbay_10.200	0.999436	1.38807	YLR110C	CCW12	0.720424	1	Cell wall mannoprotein; plays a role in maintenance of newly synthesized areas of cell wall; localizes to periphery of small buds, septum region of larger buds, and shmoo tip; CCW12 has a paralog, YDR134C, that arose from the whole genome duplication
Sbay_7.16	1	1.38938	YGL245W	GUS1	0.719746	1	Glutamyl-tRNA synthetase (GluRS); forms a complex with methionyl-tRNA synthetase (Mes1p) and Arc1p; complex formation increases the catalytic efficiency of both tRNA synthetases and ensures their correct localization to the cytoplasm; protein abundance increases in response to DNA replication stress
Sbay_8.254	1	1.38971	YOR198C	BFR1	0.719575	1.2673	Component of mRNP complexes associated with polyribosomes; implicated in secretion and nuclear segregation; multicopy suppressor of BFA (Brefeldin A) sensitivity
Sbay_12.236	0.978044	1.39185	YJR143C	PMT4	0.718468	1	Protein O-mannosyltransferase, transfers mannose residues from dolichyl phosphate-D-mannose to protein serine/threonine residues; appears to form homodimers in vivo and does not complex with other Pmt proteins; target for new antifungals
Sbay_13.464	0.999926	1.39232	YMR276W	DSK2	0.718227	1	Nuclear-enriched ubiquitin-like polyubiquitin-binding protein; required for spindle pole body (SPB) duplication and for transit through the G2/M phase of the cell cycle; involved in proteolysis; interacts with the proteasome; protein abundance increases in response to DNA replication stress
Sbay_4.229	0.997145	1.39548	YDL019C	OSH2	0.716598	1	Member of an oxysterol-binding protein family with seven members in S. cerevisiae; family members have overlapping, redundant functions in sterol metabolism and collectively perform a function essential for viability
Sbay_1.56	0.998695	1.39578	YAL012W	CYS3	0.716445	1	Cystathionine gamma-lyase, catalyzes one of the two reactions involved in the transsulfuration pathway that yields cysteine from homocysteine with the intermediary formation of cystathionine; protein abundance increases in response to DNA replication stress
Sbay_10.140	1	1.39798	YLR056W	ERG3	0.715319	0.749568	C-5 sterol desaturase, glycoprotein that catalyzes the introduction of a C-5(6) double bond into episterol, a precursor in ergosterol biosynthesis; mutants are viable, but cannot grow on non-fermentable carbon sources; substrate of the HRD ubiquitin ligase
Sbay_7.257	1	1.40076	YGL022W	STT3	0.713899	1	Subunit of the oligosaccharyltransferase complex of the ER lumen, which catalyzes asparagine-linked glycosylation of newly synthesized proteins; forms a subcomplex with Ost3p and Ost4p and is directly involved in catalysis
Sbay_5.241	0.995838	1.40195	YER120W	SCS2	0.713293	1	Integral ER membrane protein, regulates phospholipid metabolism; one of 6 proteins (Ist2p, Scs2p, Scs22p, Tcb1p, Tcb2p, Tcb3p) that connect ER to the plasma membrane (PM) and regulate PI4P levels by controlling access of Sac1p phosphatase to its substrate PI4P in the PM; interacts with FFAT motif of Opi1p; involved in telomeric silencing; null shows inositol auxotrophy above 34 deg C; VAP homolog…
Sbay_6.175	0.986164	1.40225	YJL101C	GSH1	0.713139	1	Gamma glutamylcysteine synthetase; catalyzes the first step in glutathione (GSH) biosynthesis; expression induced by oxidants, cadmium, and mercury; protein abundance increases in response to DNA replication stress
Sbay_16.67	0.984906	1.40434	YPL240C	HSP82	0.712076	1.27678	Hsp90 chaperone; redundant in function with Hsc82p; required for pheromone signaling, negative regulation of Hsf1p; docks with Tom70p for mitochondrial preprotein delivery; promotes telomerase DNA binding, nucleotide addition; protein abundance increases in response to DNA replication stress; contains two acid-rich unstructured regions that promote solubility of chaperone-substrate complexes; HSP…
Sbay_4.361	1	1.40488	YBR112C	CYC8	0.711805	1	General transcriptional co-repressor, acts together with Tup1p; also acts as part of a transcriptional co-activator complex that recruits the SWI/SNF and SAGA complexes to promoters; can form the prion [OCT+]
Sbay_15.193	0.953086	1.4109	YOR017W	PET127	0.708766	1	Protein with a role in 5'-end processing of mitochondrial RNAs, located in the mitochondrial membrane
Sbay_2.470	0.999999	1.41412	YDR304C	CPR5	0.707156	1	Peptidyl-prolyl cis-trans isomerase (cyclophilin) of the endoplasmic reticulum, catalyzes the cis-trans isomerization of peptide bonds N-terminal to proline residues; transcriptionally induced in response to unfolded proteins in the ER
Sbay_4.177	0.999918	1.42743	YDL072C	YET3	0.700558	1	Protein of unknown function; YET3 null mutant decreases the level of secreted invertase; homolog of human BAP31 protein; protein abundance increases in response to DNA replication stress
Sbay_7.402	0.992147	1.43461	YGR119C	NUP57	0.697051	1	FG-nucleoporin component of central core of the nuclear pore complex (NPC); contributes directly to nucleocytoplasmic transport and maintenance of the NPC permeability barrier; found in stable complex with Nic96p and two other FG-nucleoproteins (Nsp1p and Nup49p)
Sbay_12.154	0.9921	1.43904	YJR065C	ARP3	0.694906	1	Essential component of the Arp2/3 complex, which is a highly conserved actin nucleation center required for the motility and integrity of actin patches; involved in endocytosis and membrane growth and polarity
Sbay_7.336	1	1.43941	YGR054W		0.69473	1.75693	Eukaryotic initiation factor (eIF) 2A; associates specifically with both 40S subunits and 80 S ribosomes, and interacts genetically with both eIF5b and eIF4E; homologous to mammalian eIF2A
Sbay_8.290	0.999778	1.44799	YOR239W	ABP140	0.690611	1	AdoMet-dependent tRNA methyltransferase and actin binding protein; C-terminal domain is responsible for 3-methylcytidine modification of residue 32 of the tRNA anticodon loop of tRNA-Thr and tRNA-Ser and contains an S-adenosylmethionine (AdoMet) binding motif; N-terminal actin binding sequence interacts with actin filaments and localizes to actin patches and cables; N- and C-terminal domains are …
Sbay_15.139	1	1.45011	YOL027C	MDM38	0.689603	2.27031	Mitochondrial protein, forms a complex with Mba1p to facilitate recruitment of mRNA-specific translational activators to ribosomes; roles in protein export and K+/H+ exchange; human ortholog Letm1 implicated in Wolf-Hirschhorn syndrome
Sbay_16.351	0.999323	1.45017	YPR024W	YME1	0.689576	1	Catalytic subunit of the mitochondrial inner membrane i-AAA protease complex, which is responsible for degradation of unfolded or misfolded mitochondrial gene products; also has a role in intermembrane space protein folding; mutation causes an elevated rate of mitochondrial turnover
Sbay_10.266	1	1.45128	YLR167W	RPS31	0.689048	1.99027	Fusion protein cleaved to yield ribosomal protein S31 and ubiquitin; ubiquitin may facilitate assembly of the ribosomal protein into ribosomes; interacts genetically with translation factor eIF2B; homologous to mammalian ribosomal protein S27A, no bacterial homolog
Sbay_10.558	0.965294	1.45209	YLR440C	SEC39	0.688663	1	Component of the Dsl1p tethering complex that interacts with ER SNAREs Sec20p and Use1p; proposed to be involved in protein secretion; localizes to the ER and nuclear envelope
Sbay_6.153	1	1.45295	YJL080C	SCP160	0.688256	1	Essential RNA-binding G protein effector of mating response pathway, mainly associated with nuclear envelope and ER, interacts in mRNA-dependent manner with translating ribosomes via multiple KH domains, similar to vertebrate vigilins
Sbay_10.62	0.990011	1.45313	YLL013C	PUF3	0.688168	1	Protein of the mitochondrial outer surface, links the Arp2/3 complex with the mitochore during anterograde mitochondrial movement; also binds to and promotes degradation of mRNAs for select nuclear-encoded mitochondrial proteins
Sbay_13.19	1	1.45352	YML124C	TUB3	0.687983	1	Alpha-tubulin; associates with beta-tubulin (Tub2p) to form tubulin dimer, which polymerizes to form microtubules; expressed at lower level than Tub1p; TUB3 has a paralog, TUB1, that arose from the whole genome duplication
Sbay_8.60	0.999844	1.45398	YHR005C-A	TIM10	0.687766	1	Essential protein of the mitochondrial intermembrane space, forms a complex with Tim9p (TIM10 complex) that delivers hydrophobic proteins to the TIM22 complex for insertion into the inner membrane
Sbay_5.204	0.998453	1.45449	YER089C	PTC2	0.687525	1	Type 2C protein phosphatase (PP2C); dephosphorylates Hog1p to limit maximal osmostress induced kinase activity; dephosphorylates Ire1p to downregulate the unfolded protein response; dephosphorylates Cdc28p; inactivates the DNA damage checkpoint; PTC2 has a paralog, PTC3, that arose from the whole genome duplication
Sbay_11.172	1	1.45473	YKL054C	DEF1	0.687412	1	RNAPII degradation factor, forms a complex with Rad26p in chromatin, enables ubiquitination and proteolysis of RNAPII present in an elongation complex; mutant is deficient in Zip1p loading onto chromosomes during meiosis
Sbay_10.178	0.999293	1.4548	YLR094C	GIS3	0.687379	1	Protein of unknown function
Sbay_15.348	1	1.45519	YHR149C	SKG6	0.687196	1	Integral membrane protein that localizes primarily to growing sites such as the bud tip or the cell periphery; potential Cdc28p substrate; Skg6p interacts with Zds1p and Zds2p
Sbay_9.90	0.972001	1.45549	YIL105C	SLM1	0.687055	1	Phosphoinositide PI4,5P(2) binding protein, forms a complex with Slm2p; acts downstream of Mss4p in a pathway regulating actin cytoskeleton organization in response to stress; phosphorylated by the TORC2 complex; protein abundance increases in response to DNA replication stress; SLM1 has a paralog, SLM2, that arose from the whole genome duplication
Sbay_4.271	1	1.45554	YBR039W	ATP3	0.68703	1	Gamma subunit of the F1 sector of mitochondrial F1F0 ATP synthase, which is a large, evolutionarily conserved enzyme complex required for ATP synthesis
Sbay_8.165	0.996664	1.45741	YOR112W	CEX1	0.686149	1	Cytoplasmic component of the nuclear aminoacylation-dependent tRNA export pathway; interacts with nuclear pore component Nup116p; copurifies with tRNA export receptors Los1p and Msn5p, as well as eIF-1a and the RAN GTPase Gsp1p
Sbay_11.98	1	1.46201	YKL127W	PGM1	0.683989	1.32089	Phosphoglucomutase, minor isoform; catalyzes the conversion from glucose-1-phosphate to glucose-6-phosphate, which is a key step in hexose metabolism
Sbay_13.367	1	1.46318	YMR186W	HSC82	0.683444	1.45007	Cytoplasmic chaperone of the Hsp90 family; redundant in function and nearly identical with Hsp82p, and together they are essential; expressed constitutively at 10-fold higher basal levels than HSP82 and induced 2-3 fold by heat shock; contains two acid-rich unstructured regions that promote the solubility of chaperone-substrate complexes; HSC82 has a paralog, HSP82, that arose from the whole geno…
Sbay_2.625	1	1.46459	YDR450W	RPS18A	0.682786	2.15505	Protein component of the small (40S) ribosomal subunit; homologous to mammalian ribosomal protein S18 and bacterial S13; RPS18A has a paralog, RPS18B, that arose from the whole genome duplication; protein increases in abundance and relocalizes from cytoplasm to nuclear foci upon DNA replication stress
Sbay_16.63	0.999551	1.46523	YPL244C	HUT1	0.682487	1	Protein with a role in UDP-galactose transport to the Golgi lumen, has similarity to human UDP-galactose transporter UGTrel1, exhibits a genetic interaction with S. cerevisiae ERO1
Sbay_15.171	1	1.46931	YOL004W	SIN3	0.680591	1	Component of the Sin3p-Rpd3p histone deacetylase complex, involved in transcriptional repression and activation of diverse processes, including mating-type switching and meiosis; involved in the maintenance of chromosomal integrity
Sbay_4.150	1	1.46936	YDL095W	PMT1	0.680567	1	Protein O-mannosyltransferase of the ER membrane; transfers mannose from dolichyl phosphate-D-mannose to protein serine and threonine residues; 1 of 7 related proteins involved in O-glycosylation which is essential for cell wall rigidity; involved in ER quality control; amino terminus faces cytoplasm, carboxyl terminus faces ER lumen
Sbay_7.51	0.99242	1.47006	YGL210W	YPT32	0.680245	1	Rab family GTPase involved in the exocytic pathway; mediates intra-Golgi traffic or the budding of post-Golgi vesicles from the trans-Golgi; protein abundance increases in response to DNA replication stress; YPT32 has a paralog, YPT31, that arose from the whole genome duplication
Sbay_10.172	0.998928	1.47151	YLR088W	GAA1	0.679573	1	Subunit of the GPI (glycosylphosphatidylinositol):protein transamidase complex, removes the GPI-anchoring signal and attaches GPI to proteins in the ER
Sbay_8.264	0.977168	1.47469	YOR211C	MGM1	0.678107	1	Mitochondrial GTPase, present in complex with Ugo1p and Fzo1p; required for mt morphology and genome maintenance; exists as long and short form with different distributions; homolog of human OPA1 involved in autosomal dominant optic atrophy
Sbay_4.129	0.990514	1.47809	YDL117W	CYK3	0.676549	1	SH3-domain protein located in the bud neck and cytokinetic actin ring; relocalizes from bud neck to nucleus upon DNA replication stress; activates the chitin synthase activity of Chs2p during cytokinesis; suppressor of growth and cytokinesis defects of chs2 phospho-mutants
Sbay_12.155	0.959641	1.48094	YJR066W	TOR1	0.675248	1	PIK-related protein kinase and rapamycin target; subunit of TORC1, a complex that controls growth in response to nutrients by regulating translation, transcription, ribosome biogenesis, nutrient transport and autophagy; involved in meiosis; TOR1 has a paralog, TOR2, that arose from the whole genome duplication
Sbay_9.52	0.999912	1.48199	YIL137C	TMA108	0.674769	1	Protein that associates with ribosomes and is involved in ribosome biogenesis; putative metalloprotease
Sbay_1.48	1	1.48609	YAL019W	FUN30	0.672909	1	Snf2p family member with ATP-dependent chromatin remodeling activity; has a role in silencing at the mating type locus, telomeres and centromeres; enriched at centromeres and is required for correct chromatin structure around centromeres, as well as at the boundary element of the silent HMR; recruited to DNA double-strand breaks (DSBs) where it promotes 5' strand resection of DSBs; potential Cdc2…
Sbay_5.17	0.990084	1.48652	YEL052W	AFG1	0.672712	1	Conserved protein that may act as a chaperone in the degradation of misfolded or unassembled cytochrome c oxidase subunits; localized to matrix face of the mitochondrial inner membrane; member of the AAA family but lacks a protease domain
Sbay_8.381	0.999743	1.48787	YOR330C	MIP1	0.6721	1	Mitochondrial DNA polymerase; conserved C-terminal segment is required for the maintenance of mitochondrial genome; mutations in the human ortholog POLG are associated with Alpers-Huttenlocher syndrome (AHS) and other mitochondrial diseases; Mip1p is the single subunit of mitochondrial DNA polymerase in yeast, in contrast to metazoans in which there is a complex of a catalytic subunit and an acce…
Sbay_8.299	0.991497	1.48828	YOR250C	CLP1	0.671916	1	Component of the cleavage and polyadenylation factor I (CF I); CF 1, composed of the CF 1A complex (Rna14p, Rna15p, Clp1p, Pcf11p) and Hrp1, is involved in cleavage and polyadenylation of mRNA 3' ends; involved in both the endonucleolyitc cleavage and polyadenylation steps of mRNA 3'-end maturation
Sbay_3.121	1	1.49228	YCR084C	TUP1	0.670117	1	General repressor of transcription, forms complex with Cyc8p, involved in the establishment of repressive chromatin structure through interactions with histones H3 and H4, appears to enhance expression of some genes
Sbay_11.20	0.99803	1.4927	YKL203C	TOR2	0.669926	1	PIK-related protein kinase and rapamycin target; subunit of TORC1, a complex that regulates growth in response to nutrients and TORC2, a complex that regulates cell-cycle dependent polarization of the actin cytoskeleton; involved in meiosis; TOR2 has a paralog, TOR1, that arose from the whole genome duplication
Sbay_8.64	0.999937	1.49306	YHR008C	SOD2	0.669766	1	Mitochondrial manganese superoxide dismutase, protects cells against oxygen toxicity; phosphorylated
Sbay_5.29	0.999941	1.49489	YEL040W	UTR2	0.668944	1	Chitin transglycosylase that functions in the transfer of chitin to beta(1-6) and beta(1-3) glucans in the cell wall; similar to and functionally redundant with Crh1; glycosylphosphatidylinositol (GPI)-anchored protein localized to bud neck
Sbay_1.22	1	1.49787	YAL042W	ERV46	0.667613	1	Protein localized to COPII-coated vesicles, forms a complex with Erv41p; involved in the membrane fusion stage of transport
Sbay_7.64	1	1.49819	YGL200C	EMP24	0.667472	1	Component of the p24 complex; binds to GPI anchor proteins and mediates their efficient transport from the ER to the Golgi; integral membrane protein that associates with endoplasmic reticulum-derived COPII-coated vesicles
Sbay_6.8	1	1.49988	YFL045C	SEC53	0.666722	1	Phosphomannomutase, involved in synthesis of GDP-mannose and dolichol-phosphate-mannose; required for folding and glycosylation of secretory proteins in the ER lumen
Sbay_1.65	0.983666	1.50108	NA	NA	0.666186	1	NA
Sbay_13.74	1	1.5067	YML078W	CPR3	0.6637	1	Mitochondrial peptidyl-prolyl cis-trans isomerase (cyclophilin), catalyzes the cis-trans isomerization of peptide bonds N-terminal to proline residues; involved in protein refolding after import into mitochondria
Sbay_10.327	0.996459	1.50773	YLR231C	BNA5	0.663248	0.315863	Kynureninase, required for the de novo biosynthesis of NAD from tryptophan via kynurenine; expression regulated by Hst1p
Sbay_4.491	1	1.51019	YBR234C	ARC40	0.66217	1	Subunit of the ARP2/3 complex, which is required for the motility and integrity of cortical actin patches
Sbay_12.148	0.990903	1.5113	YJR059W	PTK2	0.661683	1	Putative serine/threonine protein kinase involved in regulation of ion transport across plasma membrane; enhances spermine uptake
Sbay_2.70	0.992167	1.51233	YBL047C	EDE1	0.661232	1	Endocytic protein; involved in a network of interactions with other endocytic proteins, binds membranes in a ubiquitin-dependent manner, may also bind ubiquitinated membrane-associated proteins; interacts with Cmk2 and functions upstream of CMK2 in regulating non-apoptotic cell death
Sbay_12.6	1	1.51625	YFR051C	RET2	0.659524	1	Delta subunit of the coatomer complex (COPI), which coats Golgi-derived transport vesicles; involved in retrograde transport between Golgi and ER
Sbay_4.478	1	1.5175	YBR221C	PDB1	0.658977	1	E1 beta subunit of the pyruvate dehydrogenase (PDH) complex, which is an evolutionarily-conserved multi-protein complex found in mitochondria
Sbay_12.5	0.982608	1.51986	YFR052W	RPN12	0.657956	1	Subunit of the 19S regulatory particle of the 26S proteasome lid; synthetically lethal with RPT1, which is an ATPase component of the 19S regulatory particle; physically interacts with Nob1p and Rpn3p; protein abundance increases in response to DNA replication stress
Sbay_11.112	0.999913	1.52038	YKL112W	ABF1	0.657731	1	DNA binding protein with possible chromatin-reorganizing activity involved in transcriptional activation, gene silencing, and DNA replication and repair
Sbay_10.300	0.998438	1.52064	YLR206W	ENT2	0.65762	1	Epsin-like protein required for endocytosis and actin patch assembly and functionally redundant with Ent1p; contains clathrin-binding motif at C-terminus
Sbay_1.110	0.996755	1.522	NA	NA	0.657032	1	NA
Sbay_15.410	0.983499	1.52372	YHR204W	MNL1	0.65629	1.63478	Alpha-1,2-specific exomannosidase of the endoplasmic reticulum; in complex with Pdi1p, generates a Man7GlcNac2 oligosaccharide signal on glycoproteins destined for ubiquitin-proteasome degradation
Sbay_13.182	1	1.52694	YMR015C	ERG5	0.654905	1	C-22 sterol desaturase, a cytochrome P450 enzyme that catalyzes the formation of the C-22(23) double bond in the sterol side chain in ergosterol biosynthesis; may be a target of azole antifungal drugs
Sbay_3.62	0.999969	1.52738	YCR028C-A	RIM1	0.654717	1	Single-stranded DNA-binding protein essential for mitochondrial genome maintenance; involved in mitochondrial DNA replication
Sbay_2.340	0.999997	1.52844	YDR174W	HMO1	0.654264	1	Chromatin associated high mobility group (HMG) family member involved in genome maintenance; rDNA-binding component of the Pol I transcription system; associates with a 5'-3' DNA helicase and Fpr1p, a prolyl isomerase
Sbay_13.492	0.997679	1.52914	YMR302C	YME2	0.653961	1	Integral inner mitochondrial membrane protein with a role in maintaining mitochondrial nucleoid structure and number; mutants exhibit an increased rate of mitochondrial DNA escape; shows some sequence similarity to exonucleases
Sbay_6.287	0.999995	1.5295	YJL208C	NUC1	0.65381	2.18042	Major mitochondrial nuclease, has RNAse and DNA endo- and exonucleolytic activities; has roles in mitochondrial recombination, apoptosis and maintenance of polyploidy
Sbay_7.476	0.999995	1.52953	YGR183C	QCR9	0.653794	1	Subunit 9 of the ubiquinol cytochrome-c reductase complex, which is a component of the mitochondrial inner membrane electron transport chain; required for electron transfer at the ubiquinol oxidase site of the complex
Sbay_2.11	0.959623	1.53241	NA	NA	0.652568	1	NA
Sbay_13.77	1	1.53476	YML075C	HMG1	0.651569	1	HMG-CoA reductase; catalyzes the conversion of HMG-CoA to mevalonate, which is a rate-limiting step in sterol biosynthesis; one of two isozymes; localizes to the nuclear envelope; overproduction induces the formation of karmellae; forms foci at the nuclear periphery upon DNA replication stress
Sbay_2.735	0.977814	1.53977	NA	NA	0.649449	1	NA
Sbay_2.138	0.999998	1.54126	YBR010W	HHT1	0.648819	1	Histone H3, core histone protein required for chromatin assembly, part of heterochromatin-mediated telomeric and HM silencing; one of two identical histone H3 proteins (see HHT2); regulated by acetylation, methylation, and phosphorylation
Sbay_13.369	0.999984	1.54252	YMR188C	MRPS17	0.648291	1	Mitochondrial ribosomal protein of the small subunit
Sbay_16.358	0.999552	1.54393	YPR028W	YOP1	0.647697	0.658077	Membrane protein that interacts with Yip1p to mediate membrane traffic; interacts with Sey1p to maintain ER morphology; overexpression leads to cell death and accumulation of internal cell membranes; mutants have reduced phosphatidylserine transfer between the ER and mitochondria; forms ER foci upon DNA replication stress
Sbay_4.413	1	1.55089	YBR162C	TOS1	0.644792	1	Covalently-bound cell wall protein of unknown function; identified as a cell cycle regulated SBF target gene; deletion mutants are highly resistant to treatment with beta-1,3-glucanase; has sequence similarity to YJL171C
Sbay_4.154	0.982289	1.55166	YDL090C	RAM1	0.644471	1	Beta subunit of the CAAX farnesyltransferase (FTase) that prenylates the a-factor mating pheromone and Ras proteins; required for the membrane localization of Ras proteins and a-factor; homolog of the mammalian FTase beta subunit
Sbay_2.711	1	1.55185	YDR529C	QCR7	0.644394	1.22775	Subunit 7 of the ubiquinol cytochrome-c reductase complex, which is a component of the mitochondrial inner membrane electron transport chain; oriented facing the mitochondrial matrix; N-terminus appears to play a role in complex assembly
Sbay_15.131	0.999967	1.55217	YOL038W	PRE6	0.644258	1	Alpha 4 subunit of the 20S proteasome; may replace alpha 3 subunit (Pre9p) under stress conditions to create a more active proteasomal isoform; GFP-fusion protein relocates from cytosol to the mitochondrial surface upon oxidative stress
Sbay_15.169	0.999992	1.55264	YOL005C	RPB11	0.644066	1	RNA polymerase II subunit B12.5; part of central core; similar to Rpc19p and bacterial alpha subunit
Sbay_16.84	0.972602	1.55531	YPL222W	FMP40	0.642959	1	Putative protein of unknown function; proposed to be involved in responding to environmental stresses; the authentic, non-tagged protein is detected in highly purified mitochondria in high-throughput studies
Sbay_3.130	0.989058	1.55563	YCR092C	MSH3	0.642825	1	Mismatch repair protein, forms dimers with Msh2p that mediate repair of insertion or deletion mutations and removal of nonhomologous DNA ends, contains a PCNA (Pol30p) binding motif required for genome stability
Sbay_2.460	0.998874	1.55908	YDR294C	DPL1	0.641406	1	Dihydrosphingosine phosphate lyase, regulates intracellular levels of sphingolipid long-chain base phosphates (LCBPs), degrades phosphorylated long chain bases, prefers C16 dihydrosphingosine-l-phosphate as a substrate
Sbay_2.334	0.999983	1.5597	YDR170C	SEC7	0.641148	1	Guanine nucleotide exchange factor (GEF) for ADP ribosylation factors involved in proliferation of the Golgi, intra-Golgi transport and ER-to-Golgi transport; found in the cytoplasm and on Golgi-associated coated vesicles
Sbay_2.312	0.999997	1.56445	YDR150W	NUM1	0.639201	1	Protein required for nuclear migration, localizes to the mother cell cortex and the bud tip; may mediate interactions of dynein and cytoplasmic microtubules with the cell cortex
Sbay_3.131	1	1.5661	YCR093W	CDC39	0.63853	1	Component of the CCR4-NOT complex, which has multiple roles in regulating mRNA levels including regulation of transcription and destabilizing mRNAs by deadenylation; basal transcription factor
Sbay_6.32	0.999996	1.56695	YFL026W	STE2	0.638181	0.685499	Receptor for alpha-factor pheromone; seven transmembrane-domain GPCR that interacts with both pheromone and a heterotrimeric G protein to initiate the signaling response that leads to mating between haploid a and alpha cells
Sbay_4.335	1	1.56729	YBR088C	POL30	0.638044	1	Proliferating cell nuclear antigen (PCNA), functions as the sliding clamp for DNA polymerase delta; may function as a docking site for other proteins required for mitotic and meiotic chromosomal DNA replication and for DNA repair
Sbay_4.549	0.998084	1.56855	YBR289W	SNF5	0.637532	1	Subunit of the SWI/SNF chromatin remodeling complex; involved in transcriptional regulation; functions interdependently in transcriptional activation with Snf2p and Snf6p; relocates to the cytosol under hypoxic conditions
Sbay_7.441	0.983426	1.57445	YGR150C	CCM1	0.635142	1	Mitochondrial 15s rRNA-binding protein; required for intron removal of COB and COX1 pre-mRNAs; contains pentatricopeptide repeat (PPR) motifs; mutant is respiratory deficient and has defective plasma membrane electron transport
Sbay_7.176	0.977004	1.57475	YGL093W	SPC105	0.635023	1	Subunit of a kinetochore-microtubule binding complex with Kre28p that bridges centromeric heterochromatin and kinetochore MAPs and motors; required for sister chromatid bi-orientation and kinetochore binding of SAC components
Sbay_13.421	0.999987	1.57479	YMR237W	BCH1	0.635004	1	Member of the ChAPs family (Chs5p-Arf1p-binding proteins); members include Bch1p, Bch2p, Bud7p, and Chs6p; ChAPs family proteins form the exomer complex with Chs5p to mediate export of specific cargo proteins from the Golgi to the plasma membrane; may interact with ribosomes; protein abundance increases and forms cytoplasmic foci in response to DNA replication stress; BCH1 has a paralog, BUD7, th…
Sbay_13.499	1	1.57557	YMR307W	GAS1	0.634693	1	Beta-1,3-glucanosyltransferase, required for cell wall assembly and also has a role in transcriptional silencing; localizes to the cell surface via a glycosylphosphatidylinositol (GPI) anchor; also found at the nuclear periphery
Sbay_13.396	0.999996	1.57938	NA	NA	0.63316	1	NA
Sbay_6.256	0.959022	1.58433	NA	NA	0.631182	1	NA
Sbay_4.207	0.952394	1.58682	YDL044C	MTF2	0.630193	1	Mitochondrial matrix protein that interacts with an N-terminal region of mitochondrial RNA polymerase (Rpo41p) and couples RNA processing and translation to transcription
Sbay_10.451	0.999994	1.58749	YLR350W	ORM2	0.629926	1	Evolutionarily conserved protein, similar to Orm1p; required for resistance to agents that induce unfolded protein response; Orm1p and Orm2p together control membrane biogenesis by coordinating lipid homeostasis with protein quality control; protein abundance increases in response to DNA replication stress
Sbay_9.167	1	1.58947	YIL033C	BCY1	0.629139	1	Regulatory subunit of the cyclic AMP-dependent protein kinase (PKA), a component of a signaling pathway that controls a variety of cellular processes, including metabolism, cell cycle, stress response, stationary phase, and sporulation
Sbay_16.192	1	1.58955	YPL118W	MRP51	0.629107	1	Mitochondrial ribosomal protein of the small subunit; MRP51 exhibits genetic interactions with mutations in the COX2 and COX3 mRNA 5'-untranslated leader sequences
Sbay_2.85	0.987552	1.5929	NA	NA	0.627786	1	NA
Sbay_16.424	0.999232	1.59515	YPR097W		0.6269	1	Protein that contains a Phox homology (PX) domain and binds phosphoinositides; the authentic, non-tagged protein is detected in highly purified mitochondria in high-throughput studies
Sbay_2.118	0.999987	1.59595	YBL007C	SLA1	0.626586	1	Cytoskeletal protein binding protein required for assembly of the cortical actin cytoskeleton; interacts with proteins regulating actin dynamics and proteins required for endocytosis; found in the nucleus and cell cortex; has 3 SH3 domains
Sbay_8.377	1	1.59663	YOR326W	MYO2	0.626318	1	Type V myosin motor involved in actin-based transport of cargos; required for the polarized delivery of secretory vesicles, the vacuole, late Golgi elements, peroxisomes, and the mitotic spindle; MYO2 has a paralog, MYO4, that arose from the whole genome duplication
Sbay_1.45	1	1.597	YAL021C	CCR4	0.626175	1	Component of the CCR4-NOT transcriptional complex, which is involved in regulation of gene expression; component of the major cytoplasmic deadenylase, which is involved in mRNA poly(A) tail shortening
Sbay_7.127	1	1.60329	YGL137W	SEC27	0.623719	1	Essential beta'-coat protein of the COPI coatomer, involved in ER-to-Golgi and Golgi-to-ER transport; contains WD40 domains that mediate cargo selective interactions; 45% sequence identity to mammalian beta'-COP
Sbay_10.323	0.985542	1.60401	YLR228C	ECM22	0.623439	1	Sterol regulatory element binding protein; regulates transcription of sterol biosynthetic genes; contains Zn[2]-Cys[6] binuclear cluster; relocates from intracellular membranes to perinuclear foci on sterol depletion; ECM22 has a paralog, UPC2, that arose from the whole genome duplication
Sbay_2.310	1	1.60691	YDR148C	KGD2	0.622312	1	Dihydrolipoyl transsuccinylase, component of the mitochondrial alpha-ketoglutarate dehydrogenase complex, which catalyzes the oxidative decarboxylation of alpha-ketoglutarate to succinyl-CoA in the TCA cycle; phosphorylated
Sbay_14.219	1	1.60743	YNL121C	TOM70	0.622111	1.31649	Component of the TOM (translocase of outer membrane) complex; involved in the recognition and initial import steps for all mitochondrially directed proteins; acts as a receptor for incoming precursor proteins; TOM70 has a paralog, TOM71, that arose from the whole genome duplication
Sbay_14.272	0.999863	1.60743	YNL068C	FKH2	0.622109	1	Forkhead family transcription factor; plays a major role in the expression of G2/M phase genes; positively regulates transcriptional elongation; negative role in chromatin silencing at HML and HMR; substrate of the Cdc28p/Clb5p kinase; FKH2 has a paralog, FKH1, that arose from the whole genome duplication
Sbay_13.410	1	1.60781	NA	NA	0.621964	1	NA
Sbay_9.68	1	1.61241	YIL123W	SIM1	0.62019	1	Protein of the SUN family (Sim1p, Uth1p, Nca3p, Sun4p) that may participate in DNA replication, promoter contains SCB regulation box at -300 bp indicating that expression may be cell cycle-regulated
Sbay_11.24	0.995099	1.61314	NA	NA	0.619908	1	NA
Sbay_7.296	1	1.61341	YGR014W	MSB2	0.619807	1	Mucin family member involved in signaling; functions in the Cdc42p- and MAP kinase-dependent filamentous growth signaling pathway; is processed into secreted and cell-associated forms by the aspartyl protease, Yps1p; also functions as an osmosensor in parallel to the Sho1p-mediated pathway; potential Cdc28p substrate
Sbay_3.177	0.996438	1.61485	NA	NA	0.619252	3.43968	NA
Sbay_12.166	0.989441	1.61587	YJR076C	CDC11	0.618861	1	Component of the septin ring that is required for cytokinesis; septins are GTP-binding proteins that assemble into rod-like hetero-oligomers that can associate with other rods to form filaments; septin rings at the mother-bud neck act as scaffolds for recruiting cell division factors and as barriers to prevent diffusion of specific proteins between mother and daughter cells
Sbay_6.223	0.999998	1.61654	YJL143W	TIM17	0.618606	1.31904	Essential subunit of the Translocase of the Inner Mitochondrial membrane (TIM23 complex); with Tim23p, contributes to the architecture and function of the import channel; may link the import motor to the core TIM23 complex
Sbay_7.470	0.999998	1.6169	YGR177C	ATF2	0.618469	1	Alcohol acetyltransferase, may play a role in steroid detoxification; forms volatile esters during fermentation, which is important for brewing and winemaking
Sbay_8.94	0.96222	1.61731	YOR042W	CUE5	0.61831	1	Protein containing a CUE domain that binds ubiquitin, which may facilitate intramolecular monoubiquitination; green fluorescent protein (GFP)-fusion protein localizes to the cytoplasm in a punctate pattern
Sbay_7.468	0.986999	1.6241	YGR174C	CBP4	0.615726	1	Mitochondrial protein required for assembly of cytochrome bc1 complex; interacts with the Cbp3p-Cbp6p complex and newly synthesized cytochrome b (Cobp) to promote assembly of Cobp into the cytochrome bc1 complex
Sbay_8.19	0.952397	1.62481	YHL032C	GUT1	0.615456	1	Glycerol kinase, converts glycerol to glycerol-3-phosphate; glucose repression of expression is mediated by Adr1p and Ino2p-Ino4p; derepression of expression on non-fermentable carbon sources is mediated by Opi1p and Rsf1p
Sbay_4.284	0.998208	1.62502	YBR052C	RFS1	0.615376	1	Protein of unknown function; member of a flavodoxin-like fold protein family that includes Pst2p and Ycp4p; green fluorescent protein (GFP)-fusion protein localizes to the cytoplasm in a punctate pattern; RFS1 has a paralog, PST2, that arose from the whole genome duplication
Sbay_2.292	0.994702	1.62812	YDR129C	SAC6	0.614207	0.755521	Fimbrin, actin-bundling protein; cooperates with Scp1p (calponin/transgelin) in the organization and maintenance of the actin cytoskeleton; relocalizes from plasma membrane to cytoplasm upon DNA replication stress
Sbay_2.588	1	1.62827	YDR411C	DFM1	0.614148	1	Endoplasmic reticulum (ER) localized protein involved in ER-associated protein degradation (ERAD), ER stress and homeostasis; interacts with components of ERAD-L and ERAD-C and Cdc48p; derlin-like family member similar to Der1p
Sbay_4.372	0.968683	1.63245	YBR126C	TPS1	0.612577	1	Synthase subunit of trehalose-6-P synthase/phosphatase complex; synthesizes the storage carbohydrate trehalose; also found in a monomeric form; expression is induced by the stress response and repressed by the Ras-cAMP pathway; protein abundance increases in response to DNA replication stress and in response to prolonged exposure to boric acid
Sbay_16.177	0.970925	1.63394	YPL133C	RDS2	0.612018	1	Transcription factor involved in regulating gluconeogenesis and glyoxylate cycle genes; member of the zinc cluster family of proteins; confers resistance to ketoconazole
Sbay_14.99	1	1.63438	YNL243W	SLA2	0.611854	1	Adaptor protein that links actin to clathrin and endocytosis; involved in membrane cytoskeleton assembly and cell polarization; present in the actin cortical patch of the emerging bud tip; dimer in vivo
Sbay_14.108	0.990563	1.63761	YNL236W	SIN4	0.610646	1	Subunit of the RNA polymerase II mediator complex; associates with core polymerase subunits to form the RNA polymerase II holoenzyme; contributes to both postive and negative transcriptional regulation; dispensible for basal transcription
Sbay_15.391	0.993209	1.64004	YHR188C	GPI16	0.60974	1	Transmembrane protein subunit of the glycosylphosphatidylinositol transamidase complex that adds GPIs to newly synthesized proteins; human PIG-Tp homolog
Sbay_6.248	1	1.64078	YJL167W	ERG20	0.609466	0.85719	Farnesyl pyrophosphate synthetase, has both dimethylallyltranstransferase and geranyltranstransferase activities; catalyzes the formation of C15 farnesyl pyrophosphate units for isoprenoid and sterol biosynthesis
Sbay_14.374	0.99998	1.64166	YNR019W	ARE2	0.609141	1	Acyl-CoA:sterol acyltransferase; endoplasmic reticulum enzyme that contributes the major sterol esterification activity in the presence of oxygen; ARE2 has a paralog, ARE1, that arose from the whole genome duplication
Sbay_16.368	0.999253	1.64197	YPR037C	ERV2	0.609025	1	Flavin-linked sulfhydryl oxidase localized to the endoplasmic reticulum lumen, involved in disulfide bond formation within the ER
Sbay_4.430	0.999994	1.64276	YBR179C	FZO1	0.60873	1	Mitofusin; integral membrane protein involved in mitochondrial outer membrane tethering and fusion; role in mitochondrial genome maintenance; efficient tethering and degradation of Fzo1p requires an intact N-terminal GTPase domain; targeted for destruction by the ubiquitin ligase SCF-Mdm30p and the cytosolic ubiquitin-proteasome system
Sbay_7.1	0.950791	1.64319	NA	NA	0.608574	0.572401	NA
Sbay_4.477	0.999977	1.64454	YBR220C		0.608072	1.65786	Putative protein of unknown function; YBR220C is not an essential gene
Sbay_13.147	0.999998	1.64838	YML013W	UBX2	0.606657	1	Bridging factor involved in ER-associated protein degradation (ERAD); bridges the cytosolic Cdc48p-Npl1p-Ufd1p ATPase complex and the membrane associated Ssm4p and Hrd1p ubiquitin ligase complexes; contains a UBX (ubiquitin regulatory X) domain and a ubiquitin-associated (UBA) domain; redistributes from the ER to lipid droplets during the diauxic shift and stationary phase; required for the maint…
Sbay_2.362	0.999984	1.64941	YDR194C	MSS116	0.606278	1.78314	DEAD-box protein required for efficient splicing of mitochondrial Group I and II introns; non-polar RNA helicase that also facilities strand annealing
Sbay_16.432	0.990578	1.65083	YPR105C	COG4	0.605756	1	Essential component of the conserved oligomeric Golgi complex (Cog1p through Cog8p), a cytosolic tethering complex that functions in protein trafficking to mediate fusion of transport vesicles to Golgi compartments
Sbay_10.232	0.999999	1.6513	YLR139C	SLS1	0.605582	1	Mitochondrial membrane protein that coordinates expression of mitochondrially-encoded genes; may facilitate delivery of mRNA to membrane-bound translation machinery
Sbay_5.128	1	1.65376	YER031C	YPT31	0.604684	1	Rab family GTPase; involved in the exocytic pathway; mediates intra-Golgi traffic or the budding of post-Golgi vesicles from the trans-Golgi; YPT31 has a paralog, YPT32, that arose from the whole genome duplication
Sbay_16.75	1	1.65959	YPL231W	FAS2	0.60256	1	Alpha subunit of fatty acid synthetase, which catalyzes the synthesis of long-chain saturated fatty acids; contains the acyl-carrier protein domain and beta-ketoacyl reductase, beta-ketoacyl synthase and self-pantetheinylation activities
Sbay_13.344	0.999303	1.6618	YMR164C	MSS11	0.601756	1	Transcription factor involved in regulation of invasive growth and starch degradation; controls the activation of FLO11 and STA2 in response to nutritional signals
Sbay_15.310	0.999534	1.66232	YHR114W	BZZ1	0.601567	1	SH3 domain protein implicated in the regulation of actin polymerization, able to recruit actin polymerization machinery through its SH3 domains, colocalizes with cortical actin patches and Las17p, interacts with type I myosins
Sbay_15.235	0.99947	1.66426	YHR047C	AAP1	0.600866	1	Arginine/alanine amino peptidase; overproduction stimulates glycogen accumulation; AAP1 has a paralog, APE2, that arose from the whole genome duplication
Sbay_3.125	0.998534	1.66494	YCR089W	FIG2	0.600621	1	Cell wall adhesin, expressed specifically during mating; may be involved in maintenance of cell wall integrity during mating
Sbay_12.164	0.999997	1.66648	YJR074W	MOG1	0.600067	1	Conserved nuclear protein that interacts with GTP-Gsp1p, which is a Ran homolog of the Ras GTPase family, and stimulates nucleotide release, involved in nuclear protein import, nucleotide release is inhibited by Yrb1p
Sbay_2.1	0.999102	1.66899	NA	NA	0.599165	1	NA
Sbay_4.249	1	1.66917	YDL004W	ATP16	0.599101	1	Delta subunit of the central stalk of mitochondrial F1F0 ATP synthase, which is a large, evolutionarily conserved enzyme complex required for ATP synthesis; phosphorylated
Sbay_1.66	0.967617	1.67026	NA	NA	0.598708	1	NA
Sbay_15.241	1	1.67115	YHR051W	COX6	0.598391	1	Subunit VI of cytochrome c oxidase, which is the terminal member of the mitochondrial inner membrane electron transport chain; expression is regulated by oxygen levels
Sbay_4.46	0.997859	1.67218	YDL202W	MRPL11	0.598021	1.93019	Mitochondrial ribosomal protein of the large subunit
Sbay_10.164	1	1.67284	YLR081W	GAL2	0.597786	1	Galactose permease, required for utilization of galactose; also able to transport glucose
Sbay_6.232	0.999983	1.67437	YJL154C	VPS35	0.597241	1	Endosomal subunit of membrane-associated retromer complex required for retrograde transport; receptor that recognizes retrieval signals on cargo proteins, forms subcomplex with Vps26p and Vps29p that selects cargo proteins for retrieval; interacts with Ypt7p
Sbay_16.246	0.969892	1.67911	YPL066W	RGL1	0.595555	1	Regulator of Rho1p signaling, cofactor of Tus1p; required for the localization of Tus1p during all phases of cytokinesis; green fluorescent protein (GFP)-fusion protein localizes to the bud neck and cytoplasm; null mutant is viable and exhibits growth defect on a non-fermentable (respiratory) carbon source
Sbay_7.26	0.998269	1.68072	YGL233W	SEC15	0.594984	1	Essential 113 kDa subunit of the exocyst complex; the exocyst mediates polarized targeting and tethering of post-Golgi secretory vesicles to active sites of exocytosis prior to SNARE-mediated fusion; interacts with and functions as a downstream effector of active, GTP-bound Sec4p, a Rab family GTPase
Sbay_10.496	1	1.68083	YLR378C	SEC61	0.594944	1	Essential subunit of Sec61 complex (Sec61p, Sbh1p, and Sss1p); forms a channel for SRP-dependent protein import and retrograde transport of misfolded proteins out of the ER; with Sec63 complex allows SRP-independent protein import into ER
Sbay_16.60	0.999978	1.68103	YPL247C		0.594873	1	Putative protein of unknown function; green fluorescent protein (GFP)-fusion protein localizes to the cytoplasm and nucleus; similar to the petunia WD repeat protein an11; overexpression causes a cell cycle delay or arrest
Sbay_1.73	0.98581	1.6839	YAR002C-A	ERP1	0.59386	1	Member of the p24 family involved in ER to Golgi transport; forms heterotrimeric complex with Erp2p, Emp24p, and Erv25p; localized to COPII-coated vesicles; ERP1 has a paralog, ERP6, that arose from the whole genome duplication
Sbay_13.153	1	1.68489	YML008C	ERG6	0.593509	0.799068	Delta(24)-sterol C-methyltransferase; converts zymosterol to fecosterol in the ergosterol biosynthetic pathway by methylating position C-24; localized to lipid particles, the plasma membrane-associated endoplasmic reticulum, and the mitochondrial outer membrane
Sbay_7.234	1	1.6858	YGL040C	HEM2	0.593191	1	Aminolevulinate dehydratase, a homo-octameric enzyme, catalyzes the conversion of 5-aminolevulinate to porphobilinogen, the second step in heme biosynthesis; enzymatic activity is zinc-dependent; localizes to the cytoplasm and nucleus
Sbay_13.146	1	1.68614	YML014W	TRM9	0.593072	2.08326	tRNA methyltransferase; catalyzes modification of wobble bases in tRNA anticodons to 2, 5-methoxycarbonylmethyluridine and 5-methoxycarbonylmethyl-2-thiouridine; may act as part of a complex with Trm112p; deletion mutation increases translational infidelity, including amino acid misincorporation and -1 frameshifting, and also confers resistance to zymocin; null mutant displays activation of stres…
Sbay_16.523	1	1.68759	YPR191W	QCR2	0.592562	1	Subunit 2 of the ubiquinol cytochrome-c reductase complex, which is a component of the mitochondrial inner membrane electron transport chain; phosphorylated; transcription is regulated by Hap1p, Hap2p/Hap3p, and heme
Sbay_4.78	0.999937	1.69152	YDL168W	SFA1	0.591185	1	Bifunctional alcohol dehydrogenase and formaldehyde dehydrogenase; formaldehyde dehydrogenase activity is glutathione-dependent; functions in formaldehyde detoxification and formation of long chain and complex alcohols, regulated by Hog1p-Sko1p; protein abundance increases in response to DNA replication stress
Sbay_2.412	0.99989	1.69332	YDR246W	TRS23	0.590554	1	One of 10 subunits of the transport protein particle (TRAPP) complex of the cis-Golgi which mediates vesicle docking and fusion; involved in endoplasmic reticulum (ER) to Golgi membrane traffic; human homolog is TRAPPC4
Sbay_7.90	1	1.695	YGL173C	XRN1	0.589971	1	Evolutionarily-conserved 5'-3' exonuclease component of cytoplasmic processing (P) bodies involved in mRNA decay; plays a role in microtubule-mediated processes, filamentous growth, ribosomal RNA maturation, and telomere maintenance; activated by the scavenger decapping enzyme Dcs1p
Sbay_7.517	0.968883	1.69649	YGR223C	HSV2	0.589451	1	Phosphatidylinositol 3,5-bisphosphate-binding protein, plays a role in micronucleophagy; belongs to the PROPPIN family of proteins; predicted to fold as a seven-bladed beta-propeller; displays punctate cytoplasmic localization
Sbay_13.149	1	1.7002	YML012W	ERV25	0.588164	1	Protein that forms a heterotrimeric complex with Erp1, Erp2p, and Emp24, member of the p24 family involved in endoplasmic reticulum to Golgi transport
Sbay_5.143	1	1.70255	YER043C	SAH1	0.587354	2.15824	S-adenosyl-L-homocysteine hydrolase, catabolizes S-adenosyl-L-homocysteine which is formed after donation of the activated methyl group of S-adenosyl-L-methionine (AdoMet) to an acceptor
Sbay_2.397	0.999456	1.70364	YDR231C	COX20	0.586977	1	Mitochondrial inner membrane protein, required for proteolytic processing of Cox2p and its assembly into cytochrome c oxidase
Sbay_5.150	0.999594	1.70373	YER048C	CAJ1	0.586948	1	Nuclear type II J heat shock protein of the E. coli dnaJ family, contains a leucine zipper-like motif, binds to non-native substrates for presentation to Ssa3p, may function during protein translocation, assembly and disassembly
Sbay_7.239	0.998249	1.70419	YGL036W		0.586788	1	Putative protein of unknown function; green fluorescent protein (GFP)-fusion protein localizes to the cytoplasm; YGL036W is not an essential gene
Sbay_6.41	1	1.7056	YFL018C	LPD1	0.586303	1	Dihydrolipoamide dehydrogenase, the lipoamide dehydrogenase component (E3) of the pyruvate dehydrogenase and 2-oxoglutarate dehydrogenase multi-enzyme complexes
Sbay_2.233	0.997719	1.70662	YDR074W	TPS2	0.585953	1	Phosphatase subunit of the trehalose-6-P synthase/phosphatase complex; involved in synthesis of the storage carbohydrate trehalose; expression is induced by stress conditions and repressed by the Ras-cAMP pathway; protein abundance increases in response to DNA replication stress
Sbay_13.507	1	1.71261	YMR314W	PRE5	0.583903	1	Alpha 6 subunit of the 20S proteasome; protein abundance increases in response to DNA replication stress
Sbay_9.175	0.99926	1.71938	YIL023C	YKE4	0.581604	1	Zinc transporter; localizes to the ER; null mutant is sensitive to calcofluor white, leads to zinc accumulation in cytosol; ortholog of the mouse KE4 and member of the ZIP (ZRT, IRT-like Protein) family
Sbay_13.69	1	1.71939	YML081C-A	ATP18	0.581601	1	Subunit of the mitochondrial F1F0 ATP synthase, which is a large enzyme complex required for ATP synthesis; termed subunit I or subunit j; does not correspond to known ATP synthase subunits in other organisms
Sbay_14.269	1	1.71979	YNL071W	LAT1	0.581467	1	Dihydrolipoamide acetyltransferase component (E2) of pyruvate dehydrogenase complex, which catalyzes the oxidative decarboxylation of pyruvate to acetyl-CoA
Sbay_4.282	1	1.72046	YBR049C	REB1	0.58124	1	RNA polymerase I enhancer binding protein; DNA binding protein that binds to genes transcribed by both RNA polymerase I and RNA polymerase II; required for termination of RNA polymerase I transcription; REB1 has a paralog, NSI1, that arose from the whole genome duplication
Sbay_14.228	1	1.72078	YNL111C	CYB5	0.581131	1	Cytochrome b5, involved in the sterol and lipid biosynthesis pathways; acts as an electron donor to support sterol C5-6 desaturation
Sbay_4.69	0.999936	1.72137	YDL178W	DLD2	0.580933	1	D-lactate dehydrogenase, located in the mitochondrial matrix
Sbay_8.209	0.999999	1.72344	YOR158W	PET123	0.580235	1.38811	Mitochondrial ribosomal protein of the small subunit; PET123 exhibits genetic interactions with PET122, which encodes a COX3 mRNA-specific translational activator
Sbay_5.281	0.993654	1.72745	YER152C		0.578887	1	Protein with 2-aminoadipate transaminase activity; shares amino acid similarity with the aminotransferases Aro8p and Aro9p; YER152C is not an essential gene
Sbay_2.72	1	1.72771	YBL045C	COR1	0.578799	1	Core subunit of the ubiquinol-cytochrome c reductase complex (bc1 complex), which is a component of the mitochondrial inner membrane electron transport chain
Sbay_10.400	1	1.7289	YLR305C	STT4	0.578404	1.2266	Phosphatidylinositol-4-kinase that functions in the Pkc1p protein kinase pathway; required for normal vacuole morphology, cell wall integrity, and actin cytoskeleton organization
Sbay_3.87	0.999991	1.72953	YCR048W	ARE1	0.578193	1	Acyl-CoA:sterol acyltransferase; endoplasmic reticulum enzyme that contributes the major sterol esterification activity in the absence of oxygen; ARE1 has a paralog, ARE2, that arose from the whole genome duplication
Sbay_10.311	0.999997	1.73042	YLR216C	CPR6	0.577894	2.15836	Peptidyl-prolyl cis-trans isomerase (cyclophilin); catalyzes the cis-trans isomerization of peptide bonds N-terminal to proline residues; binds to Hsp82p and contributes to chaperone activity; protein abundance increases in response to DNA replication stress
Sbay_6.142	0.992489	1.73692	YJL066C	MPM1	0.575733	1	Mitochondrial intermembrane space protein of unknown function
Sbay_1.21	0.999999	1.7377	YAL043C	PTA1	0.575472	1	Subunit of holo-CPF, a multiprotein complex and functional homolog of mammalian CPSF, required for the cleavage and polyadenylation of mRNA and snoRNA 3' ends; involved in pre-tRNA processing; binds to the phosphorylated CTD of RNAPII
Sbay_4.99	1	1.73785	YDL145C	COP1	0.575425	1	Alpha subunit of COPI vesicle coatomer complex, which surrounds transport vesicles in the early secretory pathway
Sbay_15.90	0.999997	1.73929	YOL076W	MDM20	0.574946	1	Non-catalytic subunit of the NatB N-terminal acetyltransferase, which catalyzes N-acetylation of proteins with specific N-terminal sequences; involved in mitochondrial inheritance and actin assembly
Sbay_12.47	1	1.74144	YJL034W	KAR2	0.574237	1.25103	ATPase involved in protein import into the ER, also acts as a chaperone to mediate protein folding in the ER and may play a role in ER export of soluble proteins; regulates the unfolded protein response via interaction with Ire1p
Sbay_12.194	1	1.74531	YJR105W	ADO1	0.572964	3.37713	Adenosine kinase, required for the utilization of S-adenosylmethionine (AdoMet); may be involved in recycling adenosine produced through the methyl cycle
Sbay_11.107	1	1.74534	YKL117W	SBA1	0.572954	1	Co-chaperone that binds to and regulates Hsp90 family chaperones; important for pp60v-src activity in yeast; homologous to the mammalian p23 proteins, and like p23 can regulate telomerase activity; protein abundance increases in response to DNA replication stress
Sbay_16.276	1	1.74549	YPL040C	ISM1	0.572904	1	Mitochondrial isoleucyl-tRNA synthetase, null mutant is deficient in respiratory growth
Sbay_12.60	0.996232	1.74556	YJL020C	BBC1	0.572883	1	Protein possibly involved in assembly of actin patches; interacts with an actin assembly factor Las17p and with the SH3 domains of Type I myosins Myo3p and Myo5p; localized predominantly to cortical actin patches
Sbay_3.117	0.994245	1.74614	YCR081W	SRB8	0.572691	1	Subunit of the RNA polymerase II mediator complex; associates with core polymerase subunits to form the RNA polymerase II holoenzyme; essential for transcriptional regulation; involved in glucose repression
Sbay_4.127	0.999881	1.7487	YDL120W	YFH1	0.571852	1.45688	Mitochondrial matrix iron chaperone; oxidizes and stores iron; interacts with Isu1p to promote Fe-S cluster assembly; mutation results in multiple Fe/S-dependent enzyme deficiencies; human frataxin homolog is mutated in Friedrich's ataxia
Sbay_2.698	0.997254	1.74993	YDR517W	GRH1	0.57145	1	Acetylated cis-Golgi protein, involved in ER to Golgi transport; homolog of human GRASP65; forms a complex with the coiled-coil protein Bug1p; mutants are compromised for the fusion of ER-derived vesicles with Golgi membranes; protein abundance increases in response to DNA replication stress
Sbay_4.53	1	1.7504	YDL195W	SEC31	0.571298	1	Component of the Sec13p-Sec31p complex of the COPII vesicle coat, required for vesicle formation in ER to Golgi transport; mutant has increased aneuploidy tolerance
Sbay_7.566	0.997537	1.75099	YGR270W	YTA7	0.571105	0.817517	Protein that localizes to chromatin and has a role in regulation of histone gene expression; has a bromodomain-like region that interacts with the N-terminal tail of histone H3, and an ATPase domain; potentially phosphorylated by Cdc28p
Sbay_10.363	0.975749	1.7516	YLR265C	NEJ1	0.570908	1	Protein involved in regulation of nonhomologous end joining; interacts with DNA ligase IV components Dnl4p and Lif1p; repressed by MAT heterozygosity; regulates cellular distribution of Lif1p
Sbay_3.53	0.998611	1.75533	YCR023C		0.569693	1	Vacuolar membrane protein of unknown function; member of the multidrug resistance family; YCR023C is not an essential gene
Sbay_10.52	1	1.75539	YLL022C	HIF1	0.569674	1	Non-essential component of the HAT-B histone acetyltransferase complex (Hat1p-Hat2p-Hif1p), localized to the nucleus; has a role in telomeric silencing
Sbay_13.216	1	1.756	YMR047C	NUP116	0.569475	1	FG-nucleoporin component of central core of the nuclear pore complex (NPC); contributes directly to nucleocytoplasmic transport and maintenance of the NPC permeability barrier; forms a stable association with Nup82p, Gle2p and two other FG-nucleoporins (Nsp1p and Nup159p)
Sbay_15.76	1	1.75677	YOL090W	MSH2	0.569227	1	Protein that forms heterodimers with Msh3p and Msh6p that bind to DNA mismatches to initiate the mismatch repair process; contains a Walker ATP-binding motif required for repair activity and involved in interstrand cross-link repair; Msh2p-Msh6p binds to and hydrolyzes ATP
Sbay_6.21	1	1.75808	YFL036W	RPO41	0.568803	1	Mitochondrial RNA polymerase; single subunit enzyme similar to those of T3 and T7 bacteriophages; requires a specificity subunit encoded by MTF1 for promoter recognition; Mtf1p interacts with and stabilizes the Rpo41p-promoter complex, enhancing DNA bending and melting to facilitate pre-initiation open complex formation
Sbay_12.117	0.973932	1.75867	YJR034W	PET191	0.568612	1	Protein required for assembly of cytochrome c oxidase; exists as an oligomer; described as both an integral mitochondrial inner membrane protein facing the intermembrane space (IMS) and as a soluble IMS protein; contains a twin Cx9C motif; imported into the IMS via the MIA import machinery
Sbay_2.493	1	1.76151	YDR322C-A	TIM11	0.567696	1	Subunit e of mitochondrial F1F0-ATPase, which is a large, evolutionarily conserved enzyme complex required for ATP synthesis; essential for the dimeric and oligomeric state of ATP synthase
Sbay_3.168	1	1.76172	YCL044C	MGR1	0.567628	1	Subunit of the mitochondrial (mt) i-AAA protease supercomplex, which degrades misfolded mitochondrial proteins; forms a subcomplex with Mgr3p that binds to substrates to facilitate proteolysis; required for growth of cells lacking mtDNA
Sbay_8.177	0.996925	1.76239	YOR125C	CAT5	0.567412	0.703247	Protein required for ubiquinone (Coenzyme Q) biosynthesis; localizes to the matrix face of the mitochondrial inner membrane in a large complex with ubiquinone biosynthetic enzymes; required for gluconeogenic gene activation
Sbay_12.112	0.999607	1.76447	YJR030C		0.566744	1	Putative protein of unknown function; expression repressed in carbon limited vs carbon replete chemostat cultures; non-essential gene; YJR030C has a paralog, YJL181W, that arose from the whole genome duplication
Sbay_16.249	1	1.76455	YPL063W	TIM50	0.566718	1	Essential component of the Translocase of the Inner Mitochondrial membrane (TIM23 complex); acts as receptor for the TIM23 complex guiding incoming precursors from the TOM complex; may control the gating of the Tim23p-Tim17p channel
Sbay_11.52	0.993568	1.76504	YKL171W	NNK1	0.566561	1	Protein kinase; implicated in proteasome function; interacts with TORC1, Ure2 and Gdh2; overexpression leads to hypersensitivity to rapamycin and nuclear accumulation of Gln3; epitope-tagged protein localizes to the cytoplasm
Sbay_4.119	1	1.77093	YDL126C	CDC48	0.564677	1	AAA ATPase involved in multiple processes; subunit of polyubiquitin-selective segregase complex involved in ERAD, cell wall integrity during heat stress, mitotic spindle disassembly; subunit of complex involved in mitochondria-associated degradation; role in mobilizing membrane bound transcription factors by regulated ubiquitin/proteasome-dependent processing; roles in macroautophagy, PMN, RAD, r…
Sbay_2.87	0.999999	1.7737	YBL032W	HEK2	0.563792	1	RNA binding protein involved in the asymmetric localization of ASH1 mRNA; represses translation of ASH1 mRNA, an effect reversed by Yck1p-dependent phosphoryation; regulates telomere position effect and length; similarity to hnRNP-K
Sbay_11.108	0.978756	1.77891	YKL116C	PRR1	0.562142	1	Serine/threonine protein kinase that inhibits pheromone induced signalling downstream of MAPK, possibly at the level of the Ste12p transcription factor
Sbay_9.166	0.999922	1.78324	YIL034C	CAP2	0.560778	1	Beta subunit of the capping protein heterodimer (Cap1p and Cap2p); capping protein (CP) binds to the barbed ends of actin filaments preventing further polymerization; localized predominantly to cortical actin patches; protein increases in abundance and relocalizes from bud neck to plasma membrane upon DNA replication stress
Sbay_6.20	1	1.78334	YFL037W	TUB2	0.560747	1	Beta-tubulin; associates with alpha-tubulin (Tub1p and Tub3p) to form tubulin dimer, which polymerizes to form microtubules; mutation in human ortholog is associated with congenital fibrosis of the extraocular muscles (CFEOM) with polymicrogyria
Sbay_10.162	0.999999	1.78677	YLR079W	SIC1	0.55967	1	Cyclin-dependent kinase inhibitor (CKI); inhibitor of Cdc28-Clb kinase complexes that controls G1/S phase transition, preventing premature S phase and ensuring genomic integrity; phosphorylation targets Sic1p for SCF(CDC4)-dependent turnover; functional homolog of mammalian Kip1
Sbay_13.66	1	1.78749	YML085C	TUB1	0.559445	1	Alpha-tubulin; associates with beta-tubulin (Tub2p) to form tubulin dimer, which polymerizes to form microtubules; relative distribution to nuclear foci increases upon DNA replication stress; TUB1 has a paralog, TUB3, that arose from the whole genome duplication
Sbay_16.58	0.999989	1.78767	YPL249C	GYP5	0.559386	1	GTPase-activating protein (GAP) for yeast Rab family members; involved in ER to Golgi trafficking; exhibits GAP activity toward Ypt1p that is stimulated by Gyl1p, also acts on Sec4p; interacts with Gyl1p, Rvs161p and Rvs167p; involved in recruiting Rvs167p to the bud tip during polarized growth; relocalizes from bud neck to cytoplasm upon DNA replication stress
Sbay_13.98	0.999819	1.79035	YML059C	NTE1	0.558549	1	Serine esterase, homolog of human neuropathy target esterase (NTE); Nte1p-mediated phosphatidylcholine turnover influences transcription factor Opi1p localization, affecting transcriptional regulation of phospholipid biosynthesis genes
Sbay_3.24	1	1.79314	YCR004C	YCP4	0.557681	0.61602	Protein of unknown function, has sequence and structural similarity to flavodoxins; predicted to be palmitoylated; the authentic, non-tagged protein is detected in highly purified mitochondria in high-throughput studies
Sbay_5.19	1	1.79556	YEL050C	RML2	0.556929	1.56509	Mitochondrial ribosomal protein of the large subunit, has similarity to E. coli L2 ribosomal protein; fat21 mutant allele causes inability to utilize oleate and may interfere with activity of the Adr1p transcription factor
Sbay_6.53	1	1.79617	YFL007W	BLM10	0.556742	1	Proteasome activator; binds the core proteasome and stimulates proteasome-mediated protein degradation by inducing gate opening; required for resistance to bleomycin, may be involved in protecting against oxidative damage; similar to mammalian PA200
Sbay_2.382	1	1.79962	YDR214W	AHA1	0.555672	1	Co-chaperone that binds to Hsp82p and activates its ATPase activity; similar to Hch1p; expression is regulated by stresses such as heat shock; protein abundance increases in response to DNA replication stress
Sbay_4.338	0.993074	1.80049	YBR091C	TIM12	0.555406	1	Essential protein of the inner mitochondrial membrane, peripherally localized; component of the TIM22 complex, which is a twin-pore translocase that mediates insertion of numerous multispanning inner membrane proteins
Sbay_16.513	1	1.80664	YPR181C	SEC23	0.553513	1	GTPase-activating protein, stimulates the GTPase activity of Sar1p; component of the Sec23p-Sec24p heterodimer of the COPII vesicle coat, involved in ER to Golgi transport; substrate of Ubp3/Bre5 complex; ubiquitylated by Ub-ligase Rsp5p; proteasome-mediated degradation of Sec23p is regulated by Cdc48p
Sbay_11.188	1	1.80751	YKL035W	UGP1	0.553246	1	UDP-glucose pyrophosphorylase (UGPase); catalyses the reversible formation of UDP-Glc from glucose 1-phosphate and UTP, involved in a wide variety of metabolic pathways, expression modulated by Pho85p through Pho4p; UGP1 has a paralog, YHL012W, that arose from the whole genome duplication
Sbay_13.447	0.999985	1.81085	YMR263W	SAP30	0.552228	1	Subunit of a histone deacetylase complex, along with Rpd3p and Sin3p, that is involved in silencing at telomeres, rDNA, and silent mating-type loci; involved in telomere maintenance
Sbay_7.471	1	1.81171	YGR178C	PBP1	0.551963	1	Component of glucose deprivation induced stress granules; involved in P-body-dependent granule assembly; similar to human ataxin-2; interacts with Pab1p to regulate mRNA polyadenylation; interacts with Mkt1p to regulate HO translation; protein increases in abundance and relative distribution to the nucleus increases upon DNA replication stress
Sbay_16.515	0.999999	1.81267	YPR183W	DPM1	0.551671	1	Dolichol phosphate mannose (Dol-P-Man) synthase of the ER membrane, catalyzes the formation of Dol-P-Man from Dol-P and GDP-Man; required for glycosyl phosphatidylinositol membrane anchoring, O mannosylation, and protein glycosylation
Sbay_7.76	1	1.81339	YGL187C	COX4	0.551455	1	Subunit IV of cytochrome c oxidase, the terminal member of the mitochondrial inner membrane electron transport chain; precursor N-terminal 25 residues are cleaved during mitochondrial import; phosphorylated; spermidine enhances translation
Sbay_6.130	1	1.81386	YJL054W	TIM54	0.55131	1.83118	Component of the mitochondrial TIM22 complex involved in insertion of polytopic proteins into the inner membrane
Sbay_4.436	0.999996	1.81439	YBR185C	MBA1	0.55115	1	Membrane-associated mitochondrial ribosome receptor; forms a complex with Mdm38p that may facilitate recruitment of mRNA-specific translational activators to ribosomes; possible role in protein export from the matrix to inner membrane
Sbay_15.226	1	1.81523	YHR039C	MSC7	0.550895	1	Protein of unknown function, green fluorescent protein (GFP)-fusion protein localizes to the endoplasmic reticulum; msc7 mutants are defective in directing meiotic recombination events to homologous chromatids
Sbay_12.227	0.998542	1.8172	YJR135W-A	TIM8	0.550297	1	Mitochondrial intermembrane space protein, forms a complex with Tim13p that delivers a subset of hydrophobic proteins to the TIM22 complex for inner membrane insertion; homolog of human TIMM8A, implicated in Mohr-Tranebjaerg syndrome
Sbay_9.85	1	1.81802	YIL109C	SEC24	0.550048	1	Component of the Sec23p-Sec24p heterodimer of the COPII vesicle coat, required for cargo selection during vesicle formation in ER to Golgi transport; homologous to Sfb2p and Sfb3p
Sbay_13.243	0.997444	1.81825	YMR068W	AVO2	0.549981	1	Component of a complex containing the Tor2p kinase and other proteins, which may have a role in regulation of cell growth
Sbay_14.43	0.999345	1.82059	YNL297C	MON2	0.549273	1	Peripheral membrane protein with a role in endocytosis and vacuole integrity, interacts with Arl1p and localizes to the endosome; member of the Sec7p family of proteins
Sbay_14.105	1	1.82157	YNL239W	LAP3	0.548976	1	Cysteine aminopeptidase with homocysteine-thiolactonase activity; protects cells against homocysteine toxicity; has bleomycin hydrolase activity in vitro; transcription is regulated by galactose via Gal4p; orthologous to human BLMH
Sbay_7.333	1	1.82394	YGR049W	SCM4	0.548264	1	Mitochondrial outer membrane protein of unknown function; predicted to have 4 transmembrane segments; import is mediated by Tom70p and Mim1p; interacts genetically with a cdc4 mutation
Sbay_16.380	0.998455	1.82525	YPR052C	NHP6A	0.547869	1	High-mobility group (HMG) protein, binds to and remodels nucleosomes; involved in recruiting FACT and other chromatin remodelling complexes to chromosomes; functionally redundant with Nhp6Bp; homologous to mammalian HMGB1 and HMGB2; NHP6A has a paralog, NHP6B, that arose from the whole genome duplication; protein abundance increases in response to DNA replication stress
Sbay_8.283	1	1.82662	YOR232W	MGE1	0.547459	1	Mitochondrial matrix cochaperone, acts as a nucleotide release factor for Ssc1p in protein translocation and folding; also acts as cochaperone for Ssq1p in folding of Fe-S cluster proteins; homolog of E. coli GrpE
Sbay_10.252	1	1.82697	YLR153C	ACS2	0.547355	1	Acetyl-coA synthetase isoform which, along with Acs1p, is the nuclear source of acetyl-coA for histone acetylation; mutants affect global transcription; required for growth on glucose; expressed under anaerobic conditions
Sbay_2.125	1	1.83441	YBL003C	HTA2	0.545134	1	Histone H2A, core histone protein required for chromatin assembly and chromosome function; one of two nearly identical (see also HTA1) subtypes; DNA damage-dependent phosphorylation by Mec1p facilitates DNA repair; acetylated by Nat4p
Sbay_10.390	1	1.83518	YLR295C	ATP14	0.544906	1	Subunit h of the F0 sector of mitochondrial F1F0 ATP synthase; F1F0 ATP synthase is a large, evolutionarily conserved enzyme complex required for ATP synthesis; protein abundance increases in response to DNA replication stress
Sbay_16.137	1	1.83693	YPL173W	MRPL40	0.544387	1.56907	Mitochondrial ribosomal protein of the large subunit
Sbay_11.242	0.99987	1.83709	YKR010C	TOF2	0.54434	1	Protein required for rDNA silencing and mitotic rDNA condensation; stimulates Cdc14p phosphatase activity and biphasic release to promote rDNA repeat segregation; required for condensin recruitment to the replication fork barrier site; TOF2 has a paralog, NET1, that arose from the whole genome duplication
Sbay_7.362	0.999999	1.83974	YGR080W	TWF1	0.543554	1	Twinfilin, highly conserved actin monomer-sequestering protein involved in regulation of the cortical actin cytoskeleton, composed of two cofilin-like regions, localizes actin monomers to sites of rapid filament assembly
Sbay_14.200	1	1.84016	YNL138W	SRV2	0.543432	1	CAP (cyclase-associated protein) subunit of adenylyl cyclase complex; N-terminus binds adenylyl cyclase and facilitates activation by RAS; C-terminus binds ADP-actin monomers, facilitating regulation of actin dynamics and cell morphogenesis
Sbay_7.364	1	1.84057	YGR082W	TOM20	0.543309	1	Component of the TOM (translocase of outer membrane) complex responsible for recognition and initial import steps for all mitochondrially directed proteins; acts as a receptor for incoming precursor proteins
Sbay_16.288	0.99999	1.84459	YPL029W	SUV3	0.542125	1	ATP-dependent RNA helicase, component of the mitochondrial degradosome along with the RNase Dss1p; the degradosome associates with the ribosome and mediates RNA turnover; also required during splicing of the COX1 AI5_beta intron
Sbay_13.45	1	1.84556	NA	NA	0.541841	1	NA
Sbay_13.176	1	1.84572	YMR012W	CLU1	0.541794	1.43661	eIF3 component of unknown function; deletion causes defects in mitochondrial organization but not in growth or translation initiation, can rescue cytokinesis and mitochondrial organization defects of the Dictyostelium cluA- mutant
Sbay_8.65	1	1.84883	YHR009C	TDA3	0.540882	1	Putative oxidoreductase involved in late endosome to Golgi transport; physical and genetical interactions with Btn2p; null mutant is viable, has extended S phase, and sensitive to expression of top1-T722A allele; similar to human FOXRED1
Sbay_15.117	1	1.85004	YOL052C	SPE2	0.540528	2.2397	S-adenosylmethionine decarboxylase, required for the biosynthesis of spermidine and spermine; cells lacking Spe2p require spermine or spermidine for growth in the presence of oxygen but not when grown anaerobically
Sbay_15.293	1	1.85044	YHR098C	SFB3	0.540412	1	Component of the Sec23p-Sfb3p heterodimer of the COPII vesicle coat, required for cargo selection during vesicle formation in ER to Golgi transport; homologous to Sec24p and Sfb2p
Sbay_6.254	0.983684	1.85617	YJL173C	RFA3	0.538745	1	Subunit of heterotrimeric Replication Protein A (RPA); RPA is a highly conserved single-stranded DNA binding protein complex involved in DNA replication, repair, and recombination; protein abundance increases in response to DNA replication stress
Sbay_6.100	0.999992	1.85698	YFR028C	CDC14	0.53851	1.623	Protein phosphatase required for mitotic exit; located in the nucleolus until liberated by the FEAR and Mitotic Exit Network in anaphase, enabling it to act on key substrates to effect a decrease in CDK/B-cyclin activity and mitotic exit; required for meiosis I spindle disassembly; released from nucleolus upon entry into anaphase I of meiosis, resequestered in metaphase II, then released again up…
Sbay_13.397	1	1.86072	NA	NA	0.537426	1	NA
Sbay_5.239	0.961347	1.86155	YER118C	SHO1	0.537187	1.70589	Transmembrane osmosensor involved in activation of the Cdc42p- and MAP kinase-dependent filamentous growth pathway and the high-osmolarity glycerol response pathway; phosphorylated by Hog1p; interacts with Pbs2p, Msb2p, Hkr1p, and Ste11p
Sbay_11.127	1	1.87073	YKL096W	CWP1	0.53455	1	Cell wall mannoprotein that localizes specifically to birth scars of daughter cells, linked to a beta-1,3- and beta-1,6-glucan heteropolymer through a phosphodiester bond; required for propionic acid resistance
Sbay_12.212	1	1.87157	YJR121W	ATP2	0.534311	1	Beta subunit of the F1 sector of mitochondrial F1F0 ATP synthase, which is a large, evolutionarily conserved enzyme complex required for ATP synthesis; phosphorylated
Sbay_12.229	0.999992	1.87205	YJR137C	MET5	0.534173	1	Sulfite reductase beta subunit, involved in amino acid biosynthesis, transcription repressed by methionine
Sbay_4.382	1	1.8728	YBR133C	HSL7	0.53396	1	Protein arginine N-methyltransferase; exhibits septin and Hsl1p-dependent bud neck localization and periodic Hsl1p-dependent phosphorylation; required along with Hsl1p for bud neck recruitment, phosphorylation, and degradation of Swe1p; relocalizes away from bud neck upon DNA replication stress
Sbay_16.38	0.972942	1.87282	YPL267W	ACM1	0.533955	1	Pseudosubstrate inhibitor of the anaphase-promoting complex/cyclosome (APC/C), that suppresses APC/C [Cdh1]-mediated proteolysis of mitotic cyclins; associates with Cdh1p, Bmh1p and Bmh2p; cell cycle regulated protein
Sbay_13.324	1	1.87294	YMR145C	NDE1	0.533919	1.62266	Mitochondrial external NADH dehydrogenase, a type II NAD(P)H:quinone oxidoreductase that catalyzes the oxidation of cytosolic NADH; Nde1p and Nde2p provide cytosolic NADH to the mitochondrial respiratory chain
Sbay_13.131	1	1.87479	YML028W	TSA1	0.533394	1	Thioredoxin peroxidase; acts as both a ribosome-associated and free cytoplasmic antioxidant; self-associates to form a high-molecular weight chaperone complex under oxidative stress; deletion results in mutator phenotype; protein abundance increases and forms cytoplasmic foci in response to DNA replication stress
Sbay_2.18	1	1.87928	YBL099W	ATP1	0.532117	1	Alpha subunit of the F1 sector of mitochondrial F1F0 ATP synthase, which is a large, evolutionarily conserved enzyme complex required for ATP synthesis; phosphorylated
Sbay_4.503	0.999979	1.88352	YBR243C	ALG7	0.530921	1	UDP-N-acetyl-glucosamine-1-P transferase, transfers Glc-Nac-P from UDP-GlcNac to Dol-P in the ER in the first step of the dolichol pathway of protein asparagine-linked glycosylation; inhibited by tunicamycin
Sbay_14.284	1	1.88813	YNL055C	POR1	0.529625	1	Mitochondrial porin (voltage-dependent anion channel); outer membrane protein required for the maintenance of mitochondrial osmotic stability and mitochondrial membrane permeability; phosphorylated; protein abundance increases in response to DNA replication stress; POR1 has a paralog, POR2, that arose from the whole genome duplication
Sbay_15.402	0.999932	1.88902	YHR199C	AIM46	0.529374	1	Putative protein of unknown function; the authentic, non-tagged protein is detected in highly purified mitochondria in high-throughput studies; null mutant displays elevated frequency of mitochondrial genome loss
Sbay_4.427	1	1.89017	YBR175W	SWD3	0.529052	1	Essential subunit of the COMPASS (Set1C) complex, which methylates histone H3 on lysine 4 and is required in transcriptional silencing near telomeres; WD40 beta propeller superfamily member and ortholog of mammalian WDR5
Sbay_15.384	1	1.89226	YHR183W	GND1	0.528468	1	6-phosphogluconate dehydrogenase (decarboxylating); catalyzes an NADPH regenerating reaction in the pentose phosphate pathway; required for growth on D-glucono-delta-lactone and adaptation to oxidative stress; GND1 has a paralog, GND2, that arose from the whole genome duplication
Sbay_14.209	1	1.89271	YNL130C	CPT1	0.528344	1	Cholinephosphotransferase; required for phosphatidylcholine biosynthesis and for inositol-dependent regulation of EPT1 transcription; CPT1 has a paralog, EPT1, that arose from the whole genome duplication
Sbay_14.126	1	1.89276	YNL216W	RAP1	0.528329	1	Essential DNA-binding transcription regulator that binds at many loci; involved in either transcription activation or repression, chromatin silencing, and telomere length maintenance; conserved protein with an N-terminal BRCT domain, a central region with homology to the Myb DNA binding domain, and a C-terminal Rap1-specific protein-interaction domain (RCT domain)
Sbay_3.68	1	1.89399	YCR034W	FEN1	0.527986	1.81366	Fatty acid elongase, involved in sphingolipid biosynthesis; acts on fatty acids of up to 24 carbons in length; mutations have regulatory effects on 1,3-beta-glucan synthase, vacuolar ATPase, and the secretory pathway; FEN1 has a paralog, ELO1, that arose from the whole genome duplication
Sbay_2.491	0.999999	1.89544	YDR321W	ASP1	0.527582	2.3138	Cytosolic L-asparaginase, involved in asparagine catabolism; catalyzes hydrolysis of L-asparagine to aspartic acid and ammonia, has an important role in therapy of acute lymphoblastic leukemia; synthesized constitutively
Sbay_15.273	0.996095	1.89677	YHR080C		0.527213	1	Protein of unknown function; may interact with ribosomes, based on co-purification experiments; the authentic, non-tagged protein is detected in highly purified mitochondria in high-throughput studies; YHR080C has a paralog, YSP2, that arose from the whole genome duplication
Sbay_8.334	1	1.89723	YOR286W	RDL2	0.527085	1.65871	Protein with rhodanese activity; contains a rhodanese-like domain similar to Rdl1p, Uba4p, Tum1p, and Ych1p; overexpression causes a cell cycle delay; null mutant displays elevated frequency of mitochondrial genome loss
Sbay_13.404	0.972224	1.90117	NA	NA	0.525991	1	NA
Sbay_10.174	0.999994	1.90577	YLR090W	XDJ1	0.524723	1.72069	Chaperone with a role in facilitating mitochondrial protein import; ascomycete-specific member of the DnaJ-like family, closely related to Ydj1p; predicted to be C-terminally prenylated; the authentic, non-tagged protein is detected in highly purified mitochondria in high-throughput studies
Sbay_13.254	0.999453	1.91321	YMR076C	PDS5	0.522682	1	Protein required for establishment and maintenance of sister chromatid condensation and cohesion, colocalizes with cohesin on chromosomes, may function as a protein-protein interaction scaffold; also required during meiosis
Sbay_2.126	1	1.914	YBL002W	HTB2	0.522466	1	Histone H2B, core histone protein required for chromatin assembly and chromosome function; nearly identical to HTB1; Rad6p-Bre1p-Lge1p mediated ubiquitination regulates transcriptional activation, meiotic DSB formation and H3 methylation
Sbay_16.468	0.981519	1.91485	YPR140W	TAZ1	0.522235	1	Lyso-phosphatidylcholine acyltransferase, required for normal phospholipid content of mitochondrial membranes; may remodel acyl groups of cardiolipin in the inner membrane; human ortholog tafazzin is implicated in Barth syndrome
Sbay_2.184	1	1.91913	YDR032C	PST2	0.52107	1	Protein with similarity to a family of flavodoxin-like proteins; induced by oxidative stress in a Yap1p dependent manner; the authentic, non-tagged protein is detected in highly purified mitochondria in high-throughput studies; protein abundance increases in response to DNA replication stress; PST2 has a paralog, RFS1, that arose from the whole genome duplication
Sbay_4.312	0.999632	1.92199	YBR073W	RDH54	0.520295	0.59841	DNA-dependent ATPase; stimulates strand exchange by modifying the topology of double-stranded DNA; involved in recombinational repair of DNA double-strand breaks during mitosis and meiosis; proposed to be involved in crossover interference; interacts with Dmc1p; stimulates Dmc1p and Rad51p
Sbay_10.378	0.999995	1.92326	YLR283W		0.51995	1	Putative protein of unknown function; green fluorescent protein (GFP)-fusion protein localizes to mitochondria; YLR283W is not an essential gene
Sbay_14.370	1	1.92373	YNR017W	TIM23	0.519825	1	Essential component of the Translocase of the Inner Mitochondrial membrane (TIM23 complex); involved in protein import into mitochondrial matrix and inner membrane; with Tim17p, contributes to architecture and function of the import channel
Sbay_14.372	1	1.92503	YNR018W	RCF2	0.519474	1	Cytochrome c oxidase subunit; has a role in assembly of respiratory supercomplexes; similar to Rcf1p, and either Rcf1p or Rcf2p is required for late-stage assembly of the Cox12p and Cox13p subunits and for cytochrome c oxidase activity; associates with the cytochrome c oxidase - cytochrome bc1 supercomplex; null mutant accumulates reactive oxygen species; member of the conserved hypoxia induced g…
Sbay_11.79	1	1.92571	YKL146W	AVT3	0.519289	1	Vacuolar transporter, exports large neutral amino acids from the vacuole; member of a family of seven S. cerevisiae genes (AVT1-7) related to vesicular GABA-glycine transporters
Sbay_8.412	0.999997	1.92692	YOR356W	CIR2	0.518962	1	Putative ortholog of human electron transfer flavoprotein dehydrogenase (ETF-dH); found in a large supramolecular complex with other mitochondrial dehydrogenases; may have a role in oxidative stress response
Sbay_8.188	0.999991	1.92771	YOR136W	IDH2	0.518751	1.59067	Subunit of mitochondrial NAD(+)-dependent isocitrate dehydrogenase, which catalyzes the oxidation of isocitrate to alpha-ketoglutarate in the TCA cycle; phosphorylated
Sbay_13.371	0.999997	1.92904	YMR190C	SGS1	0.518392	1	Nucleolar DNA helicase of the RecQ family; involved in genome integrity maintenance; regulates chromosome synapsis and meiotic joint molecule/crossover formation; potential role as repressor of a subset of rapamycin responsive genes; rapidly lost in response to rapamycin in Rrd1p-dependent manner; similar to human BLM and WRN proteins implicated in Bloom and Werner syndromes; forms nuclear foci u…
Sbay_13.96	0.999896	1.92923	YML061C	PIF1	0.518341	1	DNA helicase; exists in a nuclear form that acts as a catalytic inhibitor of telomerase; and as a mitochondrial form involved in repair and recombination of mitochondrial DNA; mutations affect zinc and iron homeostasis; regulated by Rad53p-dependent phosphorylation in rho0 cells
Sbay_2.341	1	1.92962	YDR175C	RSM24	0.518236	1.4171	Mitochondrial ribosomal protein of the small subunit
Sbay_2.606	1	1.93172	YDR430C	CYM1	0.517674	1	Lysine-specific metalloprotease of the mitochondrial intermembrane space, member of the pitrilysin family; degrades proteins and presequence peptides cleaved from imported proteins; required for normal mitochondrial morphology
Sbay_4.89	0.963017	1.93182	YDL156W	CMR1	0.517648	1	DNA-binding protein with preference for UV-damaged DNA; protein sequence contains three WD domains (WD-40 repeat); green fluorescent protein (GFP)-fusion protein localizes to the cytoplasm and nucleus; potential regulatory target of Mbp1p, which binds to the promoter region; co-localizes with Hos2p in nuclear foci in response to DNA damage by MMS
Sbay_3.156	0.999965	1.9347	YCL057W	PRD1	0.516876	1	Zinc metalloendopeptidase; found in the cytoplasm and intermembrane space of mitochondria; with Cym1p, involved in degradation of mitochondrial proteins and of presequence peptides cleaved from imported proteins; protein abundance increases in response to DNA replication stress
Sbay_7.246	0.99984	1.93496	YGL032C	AGA2	0.516807	0.545523	Adhesion subunit of a-agglutinin of a-cells, C-terminal sequence acts as a ligand for alpha-agglutinin (Sag1p) during agglutination, modified with O-linked oligomannosyl chains, linked to anchorage subunit Aga1p via two disulfide bonds
Sbay_11.55	0.999927	1.93748	YKL167C	MRP49	0.516135	1	Mitochondrial ribosomal protein of the large subunit, not essential for mitochondrial translation
Sbay_8.115	1	1.93864	YOR065W	CYT1	0.515825	1	Cytochrome c1, component of the mitochondrial respiratory chain; expression is regulated by the heme-activated, glucose-repressed Hap2p/3p/4p/5p CCAAT-binding complex
Sbay_9.252	0.999992	1.94061	YIR036C	IRC24	0.515303	1	Putative benzil reductase;(GFP)-fusion protein localizes to the cytoplasm and is induced by the DNA-damaging agent MMS; sequence similarity with short-chain dehydrogenase/reductases; null mutant has increased spontaneous Rad52p foci
Sbay_7.542	0.991843	1.94212	YGR247W	CPD1	0.514902	1.6231	Cyclic nucleotide phosphodiesterase; hydrolyzes ADP-ribose 1'', 2''-cyclic phosphate to ADP-ribose 1''-phosphate; may have a role in tRNA splicing; no detectable phenotype is conferred by null mutation or by overexpression; protein abundance increases in response to DNA replication stress
Sbay_15.154	0.996579	1.94479	YOL017W	ESC8	0.514194	1	Protein involved in telomeric and mating-type locus silencing; interacts with Sir2p and also interacts with Gal11p, which is a component of the RNA pol II mediator complex; ESC8 has a paralog, IOC3, that arose from the whole genome duplication
Sbay_15.294	1	1.94527	YHR099W	TRA1	0.514066	1	Subunit of SAGA and NuA4 histone acetyltransferase complexes; interacts with acidic activators (e.g., Gal4p) which leads to transcription activation; similar to human TRRAP, which is a cofactor for c-Myc mediated oncogenic transformation
Sbay_10.560	0.999999	1.94968	YLR442C	SIR3	0.512905	1	Silencing protein that interacts with Sir2p and Sir4p, and histone H3 and H4 tails, to establish a transcriptionally silent chromatin state; required for spreading of silenced chromatin; recruited to chromatin through interaction with Rap1p
Sbay_8.80	1	1.95127	YOR027W	STI1	0.512486	1	Hsp90 cochaperone, interacts with the Ssa group of the cytosolic Hsp70 chaperones and activates Ssa1p ATPase activity; interacts with Hsp90 chaperones and inhibits their ATPase activity; homolog of mammalian Hop
Sbay_14.377	1	1.95616	YNR022C	MRPL50	0.511205	1	Mitochondrial ribosomal protein of the large subunit, not essential for mitochondrial translation
Sbay_16.18	1	1.95621	NA	NA	0.511191	1	NA
Sbay_1.50	0.999875	1.95916	YAL017W	PSK1	0.510423	1	PAS domain-containing serine/threonine protein kinase; coordinately regulates protein synthesis and carbohydrate metabolism and storage in response to a unknown metabolite that reflects nutritional status; PSK1 has a paralog, PSK2, that arose from the whole genome duplication
Sbay_14.65	0.997212	1.96258	YNL278W	CAF120	0.509533	1	Part of the CCR4-NOT transcriptional regulatory complex; involved in controlling mRNA initiation, elongation, and degradation; CAF120 has a paralog, SKG3, that arose from the whole genome duplication
Sbay_5.12	0.978589	1.96315	YEL056W	HAT2	0.509386	1	Subunit of the Hat1p-Hat2p histone acetyltransferase complex; required for high affinity binding of the complex to free histone H4, thereby enhancing Hat1p activity; similar to human RbAp46 and 48; has a role in telomeric silencing
Sbay_2.305	1	1.96561	YDR144C	MKC7	0.508747	1	GPI-anchored aspartyl protease, member of the yapsin family of proteases involved in cell wall growth and maintenance; shares functions with Yap3p and Kex2p
Sbay_11.248	1	1.96678	YKR016W	FCJ1	0.508444	1	Mitochondrial inner membrane protein, ortholog of mammalian mitofilin; involved in import of intermembrane space (IMS) proteins, probably by positioning Mia40p relative to the TOM complex to receive incoming proteins; also has an essential role in the maintenance of crista junctions and inner membrane architecture, as a component of the mitochondrial inner membrane organizing system (MICOS, MitOS…
Sbay_13.508	1	1.96709	YMR315W		0.508366	0.661158	Protein with NADP(H) oxidoreductase activity; transcription is regulated by Stb5p in response to NADPH depletion induced by diamide; promoter contains a putative Stb5p binding site; protein abundance increases in response to DNA replication stress
Sbay_5.300	1	1.96781	YER166W	DNF1	0.50818	1	Aminophospholipid translocase (flippase) that localizes primarily to the plasma membrane; contributes to endocytosis, protein transport and cell polarity; type 4 P-type ATPase
Sbay_7.134	1	1.9692	YGL129C	RSM23	0.507821	1.61533	Mitochondrial ribosomal protein of the small subunit, has similarity to mammalian apoptosis mediator proteins; null mutation prevents induction of apoptosis by overproduction of metacaspase Mca1p
Sbay_6.136	0.997913	1.96927	YJL060W	BNA3	0.507801	1	Kynurenine aminotransferase, catalyzes formation of kynurenic acid from kynurenine; potential Cdc28p substrate
Sbay_13.65	1	1.9717	YML086C	ALO1	0.507175	1	D-Arabinono-1,4-lactone oxidase, catalyzes the final step in biosynthesis of dehydro-D-arabinono-1,4-lactone, which is protective against oxidative stress
Sbay_13.165	1	1.97354	YMR002W	MIC17	0.506704	1	Mitochondrial intermembrane space protein; required for normal oxygen consumption; contains twin cysteine-x9-cysteine motifs; protein abundance increases in response to DNA replication stress
Sbay_11.237	1	1.97444	YKR006C	MRPL13	0.506473	1.42046	Mitochondrial ribosomal protein of the large subunit, not essential for mitochondrial translation
Sbay_13.83	1	1.97579	YML072C	TCB3	0.506126	1	Cortical ER protein involved in ER-plasma membrane tethering; one of 6 proteins (Ist2p, Scs2p, Scs22p, Tcb1p, Tcb2p, Tcb3p) that connect ER to the plasma membrane (PM) and regulate PM phosphatidylinositol-4-phosphate (PI4P) levels by controlling access of Sac1p phosphatase to its substrate PI4P in the PM; localized to the bud via specific mRNA transport; non-tagged protein detected in a phosphory…
Sbay_14.398	1	1.9766	YNR043W	MVD1	0.505918	1	Mevalonate pyrophosphate decarboxylase, essential enzyme involved in the biosynthesis of isoprenoids and sterols, including ergosterol; acts as a homodimer
Sbay_4.398	0.97493	1.9775	YBR149W	ARA1	0.505689	1	NADP+ dependent arabinose dehydrogenase, involved in carbohydrate metabolism; purified as homodimer; naturally occurs with a N-terminus degradation product
[truncated: 395 more rows]

## Sheet: 14h-Log
Differentially expressed genes in S. uvarum gal80∆ gal80b∆ relative to wild-type at mid-log phase at FDR=0.05 by EBSeq
[truncated: 951 more rows]
