# Supplementary material for: Ongoing resolution of duplicate gene functions shapes the diversification of a metabolic network
Source: eLife. 2016 Sep 30;5:e19027. doi: 10.7554/eLife.19027 (PMC5089864; doi:10.7554/eLife.19027)
Supplement: Figure 5—source data 2. — DOI: http://dx.doi.org/10.7554/eLife.19027.018 [file elife-19027-fig5-data2.xlsx]

## Sheet: Ratio
Metabolite ratio between S. uvarum gal80∆ gal80b∆ and wild-type in SC +2% galactose over time
Metabolite	Mutant/WT
	0.5 h	1 h	3 h	5 h	16 h
Gluconic Acid	0.128586	0.103611	0.251565	0.535164	2.26436
Pyruvic Acid	0.692487	NS	NS	NS	2.93268
Succinic Acid	NS	NS	NS	0.586333	0.375224
Malic Acid	0.200709	0.432451	1.70868	0.567712	0.563788
α-Ketoglutaric Acid	2.63924	7.99185	NS	NS	NS
Fumaric Acid	0.180166	0.477826	2.59029	0.680265	0.462917
6-Phospho Gluconic Acid	NS	0.751892	NS	NS	NS
3-Deoxy-2-keto-5-Phosphogluconic acid	NS	NS	NS	NS	NS
Sum of 2-Phosphoglyceric acid and 3-Phosphoglyceric acid	2.74522	5.8805	2.96	1.6439	1.8236
Citric Acid	NS	2.21706	2.83397	NS	NS
Phospho(enol)pyruvic acid	0.36	4.98971	NS	2.51144	2.28106
Galactose-1-Phosphate	2.20293	2.16396	NS	NS	NS
Sum of Glucose-1-Phosphate+Mannose-1-Phosphate	2.24145	1.26987	na	na	NS
Trehalose-6-Phosphate*	>200	>231	>79	NS	6.42668
Sum of Glycerol-2-Phosphate and Glycerol-3-Phosphate	224.79	15.7409	6.80021	3.14672	NS
Aconitic Acid	na	NS	NS	NS	NS
Glucose-6-Phosphate	5.0755	1.46929	NS	NS	1.50474
Fructose-6-Phosphate	NS	NS	NS	NS	NS
Mannose-6-Phosphate	NS	NS	NS	NS	NS
Seduhepulose-7-Phosphate	NS	NS	NS	NS	1.85693
Fructose-1,6-bisphosphate	12.5808	2.1054	NS	4.58951	0.596816
AMP	0.808802	1.20801	0.773808	NS	NS
ADP	0.209231	0.263297	NS	NS	0.635695
ATP	0.20332	NS	NS	2.93476	NS
GMP	0.307664	0.348544	0.391094	0.0779284	NS
GDP	NS	NS	2.01449	NS	0.624515
Note: 1) "NS" indicates that one-sided t-test does not support significant differences between mutant and wild-type.
2) "na" indicates at lease one sample is below limit of quantification by mass spectrometry so the ratio is not reported.
3) *: The fold-change at first three points of trehalose-6-phosphate is based on minimum fold-change estimation. The levels of trehalose-6-phosphate in S. uvarum wild-type are below limit of quantification, so we estimated the minimum fold changes based on the quantification limit normalized to the cell counts.

## Sheet: Normalized Concentrations
Normalized Metabolite Concentrations
Sample Name	Strain Number	Genotype	Time Point (hr)	Normalized Sample Extract Concentration (µM/CellCount)
				Gluconic Acid	Pyruvic Acid	Succinic Acid	Malic Acid	α-Ketoglutaric Acid	Fumaric Acid	6-Phospho Gluconic Acid	3-Deoxy-2-keto-5-Phosphogluconic acid	Sum of 2-Phosphoglyceric acid and 3-Phosphoglyceric acid	Citric Acid	Isocitric Acid	Phospho(enol)pyruvic acid	Galactose-1-Phosphate	Sum of Glucose-1-Phosphate+Mannose-1-Phosphate	Trehalose-6-Phosphate	Sum of Glycerol-2-Phosphate and Glycerol -3-Phosphate	Aconitic Acid	Glucose-6-Phosphate	Fructose-6-Phosphate	Mannose-6-Phosphate	Seduhepulose-7-Phosphate	Fructose-1,6-bisphosphate	AMP	ADP	ATP	GMP	GDP
65-1 0.5h	yHMK 65	Suva WT	0.5	1.67e-09	4.79982e-09	4.01125e-08	2.48012e-08	2.07286e-09	3.46625e-09	1.04286e-10	8.39286e-12	4.39821e-10	4.7025e-09	<LOQ	1.68571e-10	4.94821e-10	1.32857e-10	<LOQ	1.625e-11	1.19107e-10	1.44821e-10	4.28571e-12	6.60714e-12	2.6375e-10	2.56964e-10	4.10714e-12	8.8625e-10	1.71252e-08	6.94643e-10	8e-11
65-1 1h	yHMK 65	Suva WT	1	2.78754e-09	3.29579e-09	5.82216e-08	2.16551e-08	2.3e-09	1.9914e-09	2.31228e-10	3.50877e-12	4.13684e-10	4.33895e-09	<LOQ	2.36842e-11	3.05404e-09	2.99474e-10	<LOQ	4.33158e-10	1.27719e-10	5.35263e-10	7.54386e-12	2.40351e-11	3.89649e-10	3.80754e-09	3.15789e-12	1.38754e-09	2.36195e-08	4.09123e-10	1.3e-10
65-1 3h	yHMK 65	Suva WT	3	2.55397e-09	3.85143e-09	6.48924e-08	8.25032e-09	2.03905e-09	7.7254e-10	2.94444e-10	4.92063e-12	7.77302e-10	9.57413e-09	<LOQ	3.69841e-11	4.05667e-09	2.91429e-10	3.65079e-12	4.41429e-10	1.43016e-10	6.77302e-10	1.5873e-11	5.19048e-11	5.21746e-10	2.40746e-09	4.12698e-12	1.57492e-09	3.32073e-08	8.34921e-10	1.63968e-10
65-1 5h	yHMK 65	Suva WT	5	9.11413e-10	4.73663e-09	5.08734e-08	1.07138e-08	1.47467e-09	1.05815e-09	1.63261e-10	6.19565e-12	7.62174e-10	1.58836e-08	<LOQ	4.03261e-11	3.74065e-09	2.1587e-10	9.45652e-11	7.74022e-10	1.93043e-10	4.39674e-10	1.80435e-11	2.40217e-11	3.92826e-10	6.39348e-10	5.1087e-12	8.25326e-10	8.8e-09	3.24598e-09	1.31522e-10
65-1 16h	yHMK 65	Suva WT	16	2.01812e-10	3.40997e-09	1.04317e-07	8.06207e-09	5.49464e-10	1.45387e-09	8.42029e-11	1.21739e-12	1.65435e-10	4.16358e-09	<LOQ	1.13043e-11	2.73842e-09	7.70406e-10	3.39957e-10	4.31304e-11	3.58696e-11	1.93304e-10	1.06812e-11	1.8e-11	1.81493e-10	1.57425e-09	3.49275e-12	3.26693e-09	3.65268e-08	8.88304e-10	2.13609e-10
65-2 0.5h	yHMK 65	Suva WT	0.5	1.47375e-09	5.05036e-09	4.38359e-08	2.43052e-08	1.82875e-09	1.94786e-09	1.07321e-10	1.55357e-11	2.60893e-10	3.35571e-09	<LOQ	7.71429e-11	4.02857e-10	1.28929e-10	<LOQ	1.35714e-11	1.2125e-10	1.14643e-10	4.46429e-12	8.57143e-12	2.43214e-10	1.85179e-10	2.67857e-12	1.0325e-09	1.7517e-08	5.38036e-10	9.85714e-11
65-2 1h	yHMK 65	Suva WT	1	2.91339e-09	3.99696e-09	6.29223e-08	2.01307e-08	2.12786e-09	2.04946e-09	2.36964e-10	4.32143e-11	4.72857e-10	6.02946e-09	<LOQ	2.78571e-11	3.23804e-09	3.1875e-10	<LOQ	5.09821e-10	1.39286e-10	6.36964e-10	8.21429e-12	3.53571e-11	3.89107e-10	4.77268e-09	3.57143e-12	1.54607e-09	2.88234e-08	4.75536e-10	1.54821e-10
65-2 3h	yHMK 65	Suva WT	3	1.71462e-09	2.97523e-09	5.81317e-08	7.90185e-09	1.83092e-09	5.55692e-10	2.5e-10	6.61538e-12	4.38615e-10	8.00985e-09	<LOQ	2.07692e-11	3.10785e-09	2.18462e-10	<LOQ	3.53077e-10	1.38e-10	4.68e-10	4.92308e-12	2.33846e-11	4.54154e-10	1.74954e-09	4.61538e-12	1.26215e-09	1.31645e-08	1.26323e-09	1.53692e-10
65-2 5h	yHMK 65	Suva WT	5	8.41895e-10	4.74432e-09	7.05117e-08	9.86926e-09	1.29495e-09	8.17368e-10	1.24211e-10	3.36842e-12	7.63684e-10	1.60382e-08	<LOQ	3.73684e-11	4.18895e-09	2.3e-10	1.99789e-10	6.64632e-10	2.04421e-10	4.30947e-10	1.87368e-11	2.50526e-11	2.88632e-10	6.20316e-10	5.78947e-12	1.29347e-09	1.15771e-08	4.29379e-09	1.95789e-10
65-2 16h	yHMK 65	Suva WT	16	1.54958e-10	2.63668e-09	1.12385e-07	7.28215e-09	3.445e-10	1.11317e-09	3.25694e-11	5.13889e-13	1.15292e-10	3.37579e-09	<LOQ	7.09722e-12	1.39472e-10	3.625e-11	3.9625e-10	1.34243e-09	3.17222e-11	1.27153e-10	1.125e-12	9.875e-12	1.6075e-10	1.12586e-09	5.875e-12	2.88507e-09	2.69907e-08	1.03656e-09	1.84292e-10
65-3 0.5h	yHMK 65	Suva WT	0.5	1.84089e-09	5.17589e-09	4.43218e-08	3.36807e-08	2.10875e-09	4.27911e-09	1.19107e-10	6.78571e-12	3.55e-10	5.09232e-09	<LOQ	9.30357e-11	5.61071e-10	1.375e-10	<LOQ	1.60714e-11	1.275e-10	1.63393e-10	6.78571e-12	1.375e-11	7.81607e-10	4.66071e-10	3.03571e-12	1.345e-09	2.75304e-08	6.16964e-10	1.37321e-10
65-3 1h	yHMK 65	Suva WT	1	3.01892e-09	2.51385e-09	7.43208e-08	2.536e-08	2.724e-09	1.92431e-09	2.04462e-10	2.46154e-12	3.81538e-10	6.63508e-09	<LOQ	2.32308e-11	2.878e-09	2.72769e-10	<LOQ	3.93231e-10	1.53692e-10	5.91692e-10	9.38462e-12	3.10769e-11	3.25538e-10	3.28785e-09	3.53846e-12	1.16277e-09	1.37512e-08	5.06308e-10	1.29846e-10
65-3 3h	yHMK 65	Suva WT	3	1.92056e-09	3.89319e-09	5.50378e-08	6.84361e-09	1.8625e-09	8.78333e-10	2.33056e-10	3.05556e-12	5.85556e-10	7.47694e-09	<LOQ	3.01389e-11	3.71486e-09	2.25833e-10	<LOQ	4.46389e-10	1.21667e-10	5.06806e-10	8.19444e-12	3.40278e-11	3.45556e-10	1.86306e-09	3.61111e-12	1.5625e-09	2.01897e-08	1.06708e-09	1.73611e-10
65-3 5h	yHMK 65	Suva WT	5	9.25644e-10	8.87624e-09	7.03084e-08	9.70119e-09	1.47307e-09	8.37921e-10	1.94554e-10	1.68317e-12	7.60594e-10	1.31012e-08	<LOQ	6.86139e-11	3.38436e-09	1.8703e-10	1.3198e-10	8.27327e-10	1.61485e-10	3.62871e-10	1.0396e-11	1.9802e-11	2.59505e-10	4.33366e-10	3.76238e-12	1.39287e-09	1.53526e-08	3.17812e-09	1.67228e-10
65-3 16h	yHMK 65	Suva WT	16	2.11164e-10	2.14389e-09	1.07546e-07	1.07465e-08	5.6337e-10	1.63063e-09	7.93425e-11	1.76712e-12	1.86822e-10	4.08453e-09	1.41918e-11	1.26164e-11	2.10151e-10	4.99178e-11	4.30986e-10	1.04821e-09	3.73151e-11	1.69945e-10	5.75342e-12	1.58356e-11	1.60192e-10	1.83773e-09	4.82192e-12	3.46482e-09	4.17366e-08	9.50904e-10	2.29877e-10
280 0.5h	yHMK 280	Suva gal80∆ gal80b∆	0.5	2.19508e-10	3.12721e-09	3.65626e-08	5.98721e-09	3.91361e-09	7.6377e-10	1.12951e-10	9.01639e-12	1.15246e-09	5.0623e-09	<LOQ	4.86885e-11	1.15115e-09	3.12951e-10	3.34041e-08	3.38721e-09	1.07541e-10	7.7459e-10	6.55738e-12	3.27869e-11	6.45082e-10	4.44689e-09	2.78689e-12	2.11311e-10	3.33033e-09	2.07049e-10	1.25082e-10
280 1h	yHMK 280	Suva gal80∆ gal80b∆	1	3.09394e-10	4.06833e-09	4.79802e-08	1.05714e-08	1.29045e-08	1.32667e-09	1.84848e-10	1.66667e-12	2.83788e-09	1.15894e-08	<LOQ	1.22576e-10	7.36182e-09	3.9697e-10	4.33617e-08	6.85833e-09	1.85455e-10	9.57273e-10	1.21212e-11	5.83333e-11	4.94848e-10	1.0067e-08	3.93939e-12	3.96515e-10	1.27112e-08	1.81364e-10	2.19394e-10
280 3h	yHMK 280	Suva gal80∆ gal80b∆	3	4.90154e-10	3.04185e-09	5.05312e-08	1.15795e-08	3.15569e-09	1.382e-09	1.85692e-10	1.26154e-11	1.38662e-09	2.1544e-08	<LOQ	5.43077e-11	3.98092e-09	3.16923e-10	6.68677e-09	2.38354e-09	2.95231e-10	7.65846e-10	9.38462e-12	4.30769e-11	4.77538e-10	5.12138e-09	3.38462e-12	1.29738e-09	2.47314e-08	6.21692e-10	3.51077e-10
280 5h	yHMK 280	Suva gal80∆ gal80b∆	5	4.30448e-10	5.56537e-09	3.16809e-08	4.9497e-09	3.25358e-09	4.61343e-10	1.9194e-10	2.98507e-12	1.24104e-09	1.39757e-08	<LOQ	1.39254e-10	1.3337e-08	2.98955e-10	2.46197e-08	2.77925e-09	2.06418e-10	4.33881e-10	2.23881e-11	2.50746e-11	1.88507e-10	2.04179e-09	3.13433e-12	9.98209e-10	2.3891e-08	2.08806e-10	1.75075e-10
280 16h	yHMK 280	Suva gal80∆ gal80b∆	16	3.42547e-10	5.24162e-09	4.248e-08	4.00298e-09	6.96e-10	5.25755e-10	3.45849e-11	4.90566e-13	2.26113e-10	3.65309e-09	<LOQ	2.44528e-11	1.83155e-09	1.50906e-10	2.37694e-09	7.92472e-10	3.01887e-11	2.15736e-10	4.0566e-12	1.17925e-11	2.63811e-10	8.27792e-10	4.50943e-12	2.20691e-09	2.36362e-08	9.96113e-10	1.2066e-10
281 0.5h	yHMK 281	Suva gal80∆ gal80b∆	0.5	2.08361e-10	3.75918e-09	5.87918e-08	4.96049e-09	7.3318e-09	5.56885e-10	1.43115e-10	1.13115e-11	8.51148e-10	5.40721e-09	<LOQ	3.7377e-11	1.07016e-09	3.0541e-10	4.82249e-08	3.63066e-09	1.37705e-10	7.75738e-10	7.21311e-12	3.31148e-11	4.50984e-10	3.72803e-09	2.95082e-12	2.3377e-10	4.47705e-09	1.68197e-10	9.18033e-11
281 1h	yHMK 281	Suva gal80∆ gal80b∆	1	3.15068e-10	5.49479e-09	7.1197e-08	8.35055e-09	2.7577e-08	6.50411e-10	1.57534e-10	2.87671e-12	2.53315e-09	1.64153e-08	<LOQ	1.56712e-10	6.41945e-09	3.81096e-10	4.4816e-08	6.78945e-09	3.43973e-10	9.02466e-10	2.20548e-11	5.35616e-11	3.72329e-10	8.56205e-09	4.52055e-12	4.1726e-10	1.58019e-08	1.87534e-10	2.00959e-10
281 3h	yHMK 281	Suva gal80∆ gal80b∆	3	5.22192e-10	2.67521e-09	7.0469e-08	1.16233e-08	2.90104e-08	1.81753e-09	2.55342e-10	1.50685e-12	2.78658e-09	2.88048e-08	8.3989e-09	1.89178e-10	3.82334e-08	<LOQ	1.23278e-08	3.98466e-09	1.0174e-09	9.47534e-10	3.53425e-11	5.72603e-11	4.41781e-10	1.16247e-08	4.38356e-12	9.64658e-10	5.4796e-08	1.43973e-10	3.50822e-10
281 5h	yHMK 281	Suva gal80∆ gal80b∆	5	5.42535e-10	3.60648e-09	4.54976e-08	6.01901e-09	6.99563e-09	5.5507e-10	2.09859e-10	2.67606e-12	1.31169e-09	4.55525e-08	9.43268e-09	1.19718e-10	5.34475e-08	<LOQ	1.06718e-09	1.91296e-09	8.52254e-10	4.96197e-10	2.11268e-11	2.3662e-11	2.35493e-10	3.42338e-09	2.53521e-12	8.28169e-10	4.01004e-08	1.22394e-10	2.19437e-10
281 16h	yHMK 281	Suva gal80∆ gal80b∆	16	5.39872e-10	1.08905e-08	3.87067e-08	5.42892e-09	9.29949e-10	6.8059e-10	5.38462e-11	3.4359e-12	3.94077e-10	1.47068e-08	7.54436e-10	2.80769e-11	1.19684e-08	2.73103e-10	1.19064e-09	1.13677e-09	8.97436e-11	3.05487e-10	3.18462e-11	1.55385e-11	3.27949e-10	6.43974e-10	3.17949e-12	1.37408e-09	1.41032e-08	1.43544e-09	1.32103e-10
282 0.5h	yHMK 282	Suva gal80∆ gal80b∆	0.5	2.13088e-10	3.51897e-09	4.45969e-08	5.66838e-09	4.61735e-09	4.25735e-10	1.23971e-10	7.94118e-12	8.94559e-10	4.91338e-09	<LOQ	3.47059e-11	9.92206e-10	2.76618e-10	2.55043e-08	3.29838e-09	<LOQ	5.95882e-10	2.94118e-12	2.27941e-11	4.07059e-10	3.25118e-09	2.20588e-12	2.37794e-10	4.83353e-09	1.93824e-10	1.225e-10
282 1h	yHMK 282	Suva gal80∆ gal80b∆	1	2.79014e-10	3.27268e-09	5.56131e-08	1.01154e-08	1.66751e-08	8.73239e-10	1.6338e-10	2.98592e-11	2.08592e-09	9.6931e-09	<LOQ	9.38028e-11	6.06239e-09	3.5338e-10	2.89366e-08	7.38535e-09	1.83662e-10	7.31972e-10	6.47887e-12	3.59155e-11	4.09437e-10	6.35803e-09	3.94366e-12	2.64789e-10	1.14875e-08	1.15915e-10	1.49577e-10
282 3h	yHMK 282	Suva gal80∆ gal80b∆	3	5.44627e-10	8.82716e-09	5.83285e-08	1.60896e-08	4.99896e-09	2.51612e-09	2.18955e-10	8.50746e-12	1.16104e-09	2.06731e-08	1.26776e-09	6.16418e-11	6.20224e-09	3.10448e-10	4.38328e-09	2.07015e-09	2.62388e-10	6.1403e-10	2.04478e-11	3.46269e-11	3.9403e-10	3.42776e-09	1.79104e-12	1.2797e-09	3.24985e-08	4.72239e-10	2.87761e-10
282 5h	yHMK 282	Suva gal80∆ gal80b∆	5	4.60694e-10	9.84958e-09	3.52178e-08	6.22403e-09	2.30042e-09	8.29444e-10	3.44167e-10	4.86111e-12	1.20597e-09	1.43128e-08	1.49028e-10	1.08472e-10	1.1451e-08	3.3e-10	3.06475e-08	2.43819e-09	2.20833e-10	5.11389e-10	1.11111e-11	2.02778e-11	3.72222e-10	2.305e-09	2.91667e-12	1.95014e-09	4.08665e-08	5.04028e-10	2.52361e-10
282 16h	yHMK 282	Suva gal80∆ gal80b∆	16	4.03586e-10	7.88807e-09	4.04786e-08	5.27772e-09	5.38776e-10	7.36828e-10	5.15172e-11	1.10345e-12	2.32431e-10	3.01305e-09	<LOQ	1.82241e-11	1.07436e-09	1.03983e-10	3.93359e-09	8.78397e-10	3.15345e-11	2.16707e-10	7.72414e-12	1.64828e-11	3.41224e-10	1.23648e-09	3.68966e-12	2.53238e-09	3.66389e-08	7.2681e-10	1.39293e-10
56-1	yHMK 56	Scer WT	4.5h	8.97442e-09	1.33596e-09	3.59138e-08	1.24383e-08	2.07346e-09	1.54269e-09	6.10962e-10	9.80769e-12	2.56346e-10	6.58635e-09	<LOQ	3.32692e-11	3.18558e-09	1.78462e-10	<LOQ	3.44231e-10	1.45962e-10	3.61923e-10	6.92308e-12	2.07692e-11	4.70385e-10	1.90769e-09	2.5e-12	2.63635e-09	9.60331e-08	3.95385e-10	1.80962e-10
56-2	yHMK 56	Scer WT	4.5h	9.53942e-09	1.66288e-09	3.86181e-08	1.33488e-08	1.96654e-09	1.53673e-09	6.23269e-10	1e-11	2.65192e-10	5.83423e-09	<LOQ	3.17308e-11	3.34019e-09	1.84038e-10	<LOQ	4.05962e-10	1.41154e-10	4.39038e-10	5.57692e-12	2.13462e-11	4.31154e-10	2.21519e-09	2.11538e-12	3.00538e-09	1.00589e-07	3.90192e-10	2.12885e-10
370	yHMK 370	Scer gal1	4.5h	1.79621e-08	7.5697e-10	7.23758e-09	2.12727e-09	1.72985e-09	1.50455e-10	2.04682e-09	6.51515e-12	2.5197e-10	4.16667e-09	<LOQ	6.40909e-11	<LOQ	1.03182e-10	<LOQ	5.30303e-12	1.02424e-10	1.26667e-10	5.30303e-12	1.01515e-11	1.59848e-10	4.09091e-11	<LOQ	2.885e-09	4.8217e-08	8.68939e-10	2.17121e-10
371	yHMK 371	Scer gal1	4.5h	4.54608e-08	1.2875e-09	9.8045e-09	3.3285e-09	1.8265e-09	7.14167e-10	4.024e-09	8.33333e-12	2.16e-10	3.7785e-09	<LOQ	5.98333e-11	<LOQ	1.195e-10	<LOQ	6e-12	8.78333e-11	2.12167e-10	8.33333e-12	1.55e-11	1.73833e-10	1.16333e-10	2.66667e-12	2.857e-09	3.91672e-08	1.41967e-09	2.54667e-10
CT322-1	yHCT 322	Scer gal7∆	4.5h	3.51524e-08	4.288e-10	4.8596e-09	2.0232e-09	1.7606e-09	8.4e-11	3.584e-09	1.8e-12	5.076e-10	5.5684e-09	<LOQ	1.434e-10	2.50778e-08	<LOQ	<LOQ	1.78e-11	1.232e-10	2.018e-10	<LOQ	1.16e-11	3.38e-11	9.9e-11	2.2e-12	3.6506e-09	6.10216e-08	1.735e-09	3.578e-10
CT322-2	yHCT 322	Scer gal7∆	4.5h	1.7826e-08	7.94524e-10	7.9e-09	3.40214e-09	2.64286e-09	3.14524e-10	1.49238e-09	7.61905e-12	1.61429e-10	3.48738e-09	<LOQ	3.54762e-11	1.92548e-08	<LOQ	<LOQ	9.04762e-12	1.22143e-10	2.52143e-10	9.28571e-12	1.80952e-11	2.62381e-10	1.53095e-10	1.90476e-12	2.27619e-09	3.01457e-08	1.21571e-09	2.11667e-10
CT324-1	yHCT 324	Scer gal10∆	4.5h	1.90036e-08	8.83929e-10	8.8497e-09	2.6625e-09	1.61607e-09	2.36607e-10	1.9503e-09	7.14286e-12	3.01935e-10	7.04658e-09	<LOQ	7.72321e-11	3.05865e-08	<LOQ	<LOQ	8.18452e-12	1.10417e-10	1.86458e-10	9.375e-12	1.8006e-11	9.74702e-11	1.04167e-10	3.125e-12	2.50387e-09	3.70417e-08	1.63884e-09	2.39881e-10
CT324-2	yHCT 324	Scer gal10∆	4.5h	1.90518e-08	3.16486e-10	7.10924e-09	2.54928e-09	2.33098e-09	3.98188e-10	2.11649e-09	4.8913e-12	4.82065e-10	4.82246e-09	<LOQ	1.40942e-10	4.01018e-08	<LOQ	<LOQ	1.41304e-11	1.23913e-10	1.66667e-10	<LOQ	9.23913e-12	3.89493e-11	1.11957e-10	2.17391e-12	2.6529e-09	3.5206e-08	1.50942e-09	3.06341e-10
