# Supplementary material for: Ongoing resolution of duplicate gene functions shapes the diversification of a metabolic network
Source: eLife journal article supplement (doi:10.7554/elife.19027), 2016-09-30
Supplement: supp [file elife-19027-supp-v1.zip]

Figure 2-Figure Supplement 1.

|                                 | MM +2%<br>glucose | MM +2%<br>galactose |
|---------------------------------|-------------------|---------------------|
| <i>Scer</i> WT                  | +                 | +                   |
| <i>Scer gall</i>                | +                 | -                   |
| <i>Scer<br/>gallΔ::SuvaGAL3</i> | +                 | +                   |
| <i>Suva</i> WT                  | +                 | +                   |
| <i>Suva gallΔ</i>               | +                 | -                   |
