# Supplementary material for: Ongoing resolution of duplicate gene functions shapes the diversification of a metabolic network
Source: eLife. 2016 Sep 30;5:e19027. doi: 10.7554/eLife.19027 (PMC5089864; doi:10.7554/eLife.19027)
Supplement: Supplementary file 1. — DOI: http://dx.doi.org/10.7554/eLife.19027.023 [file elife-19027-supp1.xlsx]

## Sheet: 4h_UpMut
GO-Term enriched for genes that are two-folds up-regulated in S. uvarum gal80∆ gal80b∆ relative to wild-type at FDR=0.05 during TGA
Process
GOID	GO_term	Cluster frequency	Background frequency	p-value	FDR	Status after growth resumed	Gene(s) annotated to the term
42254	ribosome biogenesis	76 out of 544 genes, 14.0%	329 out of 4922 background genes, 6.7%	8.48e-08	0	up-regulated	MAK16/YAL025C:ECM1/YAL059W:ENP1/YBR247C:RRP43/YCR035C:DBP10/YDL031W:NHP2/YDL208W:NOP6/YDL213C:MAK21/YDR060W:RRP8/YDR083W:FCF1/YDR339C:ESF1/YDR365C:PUF6/YDR496C:NOP16/YER002W:UTP7/YER082C:NSA2/YER126C:LCP5/YER127W:GLC7/YER133W:LOC1/YFR001W:CGR1/YGL029W:DBP3/YGL078C:ROK1/YGL171W:RAI1/YGL246C:SLX9/YGR081C:NOP7/YGR103W:SDA1/YGR245C:RRP3/YHR065C:SSF1/YHR066W:NOP10/YHR072W-A:RPF1/YHR088W:IMP3/YHR148W:B…
6364	rRNA processing	59 out of 544 genes, 10.8%	227 out of 4922 background genes, 4.6%	1.04e-07	0	up-regulated	MAK16/YAL025C:ENP1/YBR247C:RRP43/YCR035C:DBP10/YDL031W:NHP2/YDL208W:RRP8/YDR083W:FCF1/YDR339C:ESF1/YDR365C:UTP7/YER082C:NSA2/YER126C:LCP5/YER127W:GLC7/YER133W:LOC1/YFR001W:CGR1/YGL029W:DBP3/YGL078C:ROK1/YGL171W:RAI1/YGL246C:SLX9/YGR081C:NOP7/YGR103W:RRP3/YHR065C:SSF1/YHR066W:NOP10/YHR072W-A:RPF1/YHR088W:IMP3/YHR148W:BMT5/YIL096C:NOP9/YJL010C:HCA4/YJL033W:MRT4/YKL009W:UTP11/YKL099C:EBP2/YKL172W:UT…
16072	rRNA metabolic process	60 out of 544 genes, 11.0%	243 out of 4922 background genes, 4.9%	6.73e-07	0	up-regulated	MAK16/YAL025C:ENP1/YBR247C:RRP43/YCR035C:DBP10/YDL031W:NHP2/YDL208W:RRP8/YDR083W:FCF1/YDR339C:ESF1/YDR365C:UTP7/YER082C:NSA2/YER126C:LCP5/YER127W:GLC7/YER133W:LOC1/YFR001W:CGR1/YGL029W:DBP3/YGL078C:ROK1/YGL171W:RAI1/YGL246C:SLX9/YGR081C:NOP7/YGR103W:RRP3/YHR065C:SSF1/YHR066W:NOP10/YHR072W-A:RPF1/YHR088W:IMP3/YHR148W:AIR1/YIL079C:BMT5/YIL096C:NOP9/YJL010C:HCA4/YJL033W:MRT4/YKL009W:UTP11/YKL099C:EB…
42273	ribosomal large subunit biogenesis	33 out of 544 genes, 6.1%	103 out of 4922 background genes, 2.1%	7.28e-06	0	up-regulated	MAK16/YAL025C:DBP10/YDL031W:MAK21/YDR060W:RRP8/YDR083W:PUF6/YDR496C:NOP16/YER002W:NSA2/YER126C:LOC1/YFR001W:DBP3/YGL078C:RAI1/YGL246C:NOP7/YGR103W:SDA1/YGR245C:SSF1/YHR066W:RPF1/YHR088W:SQT1/YIR012W:YVH1/YIR026C:ALB1/YJL122W:MRT4/YKL009W:RRP14/YKL082C:RLP24/YLR009W:ERB1/YMR049C:HAS1/YMR290C:RLP7/YNL002C:NOP15/YNL110C:REX4/YOL080C:RRS1/YOR294W:NOP4/YPL043W:NOP53/YPL146C:RSA1/YPL193W:HRR25/YPL204W:…
22613	ribonucleoprotein complex biogenesis	80 out of 544 genes, 14.7%	401 out of 4922 background genes, 8.1%	4.17e-05	0	up-regulated	MAK16/YAL025C:ECM1/YAL059W:PRP5/YBR237W:ENP1/YBR247C:RRP43/YCR035C:DBP10/YDL031W:NHP2/YDL208W:NOP6/YDL213C:MAK21/YDR060W:RRP8/YDR083W:SLU7/YDR088C:FCF1/YDR339C:ESF1/YDR365C:PUF6/YDR496C:NOP16/YER002W:UTP7/YER082C:NSA2/YER126C:LCP5/YER127W:GLC7/YER133W:LOC1/YFR001W:CGR1/YGL029W:DBP3/YGL078C:ROK1/YGL171W:RAI1/YGL246C:SLX9/YGR081C:NOP7/YGR103W:SDA1/YGR245C:RRP3/YHR065C:SSF1/YHR066W:NOP10/YHR072W-A:R…
34470	ncRNA processing	68 out of 544 genes, 12.5%	327 out of 4922 background genes, 6.6%	9.65e-05	0	up-regulated	MAK16/YAL025C:KTI11/YBL071W-A:TRM7/YBR061C:ENP1/YBR247C:RRP43/YCR035C:DBP10/YDL031W:NHP2/YDL208W:RRP8/YDR083W:FCF1/YDR339C:ESF1/YDR365C:UTP7/YER082C:NSA2/YER126C:LCP5/YER127W:GLC7/YER133W:LOC1/YFR001W:CGR1/YGL029W:TYW3/YGL050W:DBP3/YGL078C:NBP35/YGL091C:ROK1/YGL171W:RAI1/YGL246C:SLX9/YGR081C:NOP7/YGR103W:RRP3/YHR065C:SSF1/YHR066W:NOP10/YHR072W-A:RPF1/YHR088W:IMP3/YHR148W:BMT5/YIL096C:NOP9/YJL010C…
19752	carboxylic acid metabolic process	65 out of 544 genes, 11.9%	315 out of 4922 background genes, 6.4%	0.00026	0	WT levels	CDC19/YAL038W:GCV3/YAL044C:ACS1/YAL054C:UGA2/YBR006W:LYS2/YBR115C:LEU2/YCL018W:CHA1/YCL064C:CIT2/YCR005C:UGA3/YDL170W:GCV1/YDR019C:ARO3/YDR035W:TPI1/YDR050C:ARO10/YDR380W:YAT2/YER024W:HIS1/YER055C:CEM1/YER061C:ICL1/YER065C:ARG5,6/YER069W:ALD5/YER073W:SER3/YER081W:LEU1/YGL009C:POX1/YGL205W:UGA1/YGR019W:PFK1/YGR240C:ENO1/YGR254W:BIO2/YGR286C:ARG4/YHR018C:ARO9/YHR137W:BAT1/YHR208W:LYS12/YIL094C:MGA2…
9064	glutamine family amino acid metabolic process	16 out of 544 genes, 2.9%	36 out of 4922 background genes, 0.7%	0.00044	0	WT levels	UGA2/YBR006W:CIT2/YCR005C:ARG5,6/YER069W:ARG4/YHR018C:ARG3/YJL088W:URA2/YJL130C:CPA2/YJR109C:PUT1/YLR142W:CAR2/YLR438W:ARG81/YML099C:ARG7/YMR062C:GAD1/YMR250W:ARG1/YOL058W:CPA1/YOR303W:CAR1/YPL111W:GLN1/YPR035W
43436	oxoacid metabolic process	66 out of 544 genes, 12.1%	327 out of 4922 background genes, 6.6%	0.0005	0	down-regulated	CDC19/YAL038W:GCV3/YAL044C:ACS1/YAL054C:UGA2/YBR006W:LYS2/YBR115C:LEU2/YCL018W:CHA1/YCL064C:CIT2/YCR005C:UGA3/YDL170W:GCV1/YDR019C:ARO3/YDR035W:TPI1/YDR050C:ARO10/YDR380W:YAT2/YER024W:HIS1/YER055C:CEM1/YER061C:ICL1/YER065C:ARG5,6/YER069W:ALD5/YER073W:SER3/YER081W:LEU1/YGL009C:POX1/YGL205W:UGA1/YGR019W:PFK1/YGR240C:ENO1/YGR254W:BIO2/YGR286C:ARG4/YHR018C:ARO9/YHR137W:BAT1/YHR208W:LYS12/YIL094C:MGA2…
6082	organic acid metabolic process	66 out of 544 genes, 12.1%	327 out of 4922 background genes, 6.6%	0.0005	0	down-regulated	CDC19/YAL038W:GCV3/YAL044C:ACS1/YAL054C:UGA2/YBR006W:LYS2/YBR115C:LEU2/YCL018W:CHA1/YCL064C:CIT2/YCR005C:UGA3/YDL170W:GCV1/YDR019C:ARO3/YDR035W:TPI1/YDR050C:ARO10/YDR380W:YAT2/YER024W:HIS1/YER055C:CEM1/YER061C:ICL1/YER065C:ARG5,6/YER069W:ALD5/YER073W:SER3/YER081W:LEU1/YGL009C:POX1/YGL205W:UGA1/YGR019W:PFK1/YGR240C:ENO1/YGR254W:BIO2/YGR286C:ARG4/YHR018C:ARO9/YHR137W:BAT1/YHR208W:LYS12/YIL094C:MGA2…
460	maturation of 5.8S rRNA	25 out of 544 genes, 4.6%	81 out of 4922 background genes, 1.6%	0.00118	0	up-regulated	MAK16/YAL025C:ENP1/YBR247C:RRP43/YCR035C:DBP10/YDL031W:FCF1/YDR339C:UTP7/YER082C:NSA2/YER126C:LCP5/YER127W:LOC1/YFR001W:DBP3/YGL078C:ROK1/YGL171W:RAI1/YGL246C:RPF1/YHR088W:NOP9/YJL010C:UTP11/YKL099C:FCF2/YLR051C:RMP1/YLR145W:RLP7/YNL002C:KRI1/YNL308C:MPP6/YNR024W:BUD21/YOR078W:PNO1/YOR145C:RRS1/YOR294W:TIF6/YPR016C:RRP15/YPR143W
466	maturation of 5.8S rRNA from tricistronic rRNA transcript (SSU-rRNA, 5.8S rRNA, LSU-rRNA)	25 out of 544 genes, 4.6%	81 out of 4922 background genes, 1.6%	0.00118	0	up-regulated	MAK16/YAL025C:ENP1/YBR247C:RRP43/YCR035C:DBP10/YDL031W:FCF1/YDR339C:UTP7/YER082C:NSA2/YER126C:LCP5/YER127W:LOC1/YFR001W:DBP3/YGL078C:ROK1/YGL171W:RAI1/YGL246C:RPF1/YHR088W:NOP9/YJL010C:UTP11/YKL099C:FCF2/YLR051C:RMP1/YLR145W:RLP7/YNL002C:KRI1/YNL308C:MPP6/YNR024W:BUD21/YOR078W:PNO1/YOR145C:RRS1/YOR294W:TIF6/YPR016C:RRP15/YPR143W
1901565	organonitrogen compound catabolic process	24 out of 544 genes, 4.4%	76 out of 4922 background genes, 1.5%	0.00123	0	down-regulated	GCV3/YAL044C:UGA2/YBR006W:CHA1/YCL064C:UGA3/YDL170W:GCV1/YDR019C:ARO10/YDR380W:UGA1/YGR019W:DUR3/YHL016C:BAT1/YHR208W:DAL4/YIR028W:DAL2/YIR029W:DAL3/YIR032C:PUT1/YLR142W:CDD1/YLR245C:CTS1/YLR286C:CAR2/YLR438W:ALD3/YMR169C:ALD2/YMR170C:GCV2/YMR189W:GAD1/YMR250W:ADH2/YMR303C:AAH1/YNL141W:THI20/YOL055C:CAR1/YPL111W
6525	arginine metabolic process	10 out of 544 genes, 1.8%	16 out of 4922 background genes, 0.3%	0.00135	0	WT levels	ARG5,6/YER069W:ARG4/YHR018C:ARG3/YJL088W:CPA2/YJR109C:CAR2/YLR438W:ARG81/YML099C:ARG7/YMR062C:ARG1/YOL058W:CPA1/YOR303W:CAR1/YPL111W
1901605	alpha-amino acid metabolic process	32 out of 544 genes, 5.9%	123 out of 4922 background genes, 2.5%	0.0026	0	WT levels	GCV3/YAL044C:UGA2/YBR006W:LYS2/YBR115C:LEU2/YCL018W:CHA1/YCL064C:CIT2/YCR005C:GCV1/YDR019C:ARO10/YDR380W:HIS1/YER055C:ARG5,6/YER069W:SER3/YER081W:LEU1/YGL009C:ARG4/YHR018C:LYS12/YIL094C:LYS1/YIR034C:ARG3/YJL088W:URA2/YJL130C:CPA2/YJR109C:MTD1/YKR080W:PUT1/YLR142W:CAR2/YLR438W:ARG81/YML099C:ADI1/YMR009W:ARG7/YMR062C:GCV2/YMR189W:GAD1/YMR250W:ARG1/YOL058W:LEU9/YOR108W:CPA1/YOR303W:CAR1/YPL111W:GLN1…
42274	ribosomal small subunit biogenesis	31 out of 544 genes, 5.7%	124 out of 4922 background genes, 2.5%	0.00923	0	up-regulated	ENP1/YBR247C:NOP6/YDL213C:FCF1/YDR339C:UTP7/YER082C:LCP5/YER127W:LOC1/YFR001W:ROK1/YGL171W:SLX9/YGR081C:NOP7/YGR103W:RRP3/YHR065C:IMP3/YHR148W:NOP9/YJL010C:RRP14/YKL082C:UTP11/YKL099C:UTP30/YKR060W:FCF2/YLR051C:FYV7/YLR068W:BUD22/YMR014W:ECM16/YMR128W:TMA23/YMR269W:HAS1/YMR290C:IMP4/YNL075W:RIO2/YNL207W:KRI1/YNL308C:BUD21/YOR078W:PNO1/YOR145C:RRP36/YOR287C:RRS1/YOR294W:HRR25/YPL204W:BMS1/YPL217C:…
Function
GOID	GO_term	Cluster frequency	Background frequency	p-value	FDR	Status after growth resumed	Gene(s) annotated to the term
16620	oxidoreductase activity, acting on the aldehyde or oxo group of donors, NAD or NADP as acceptor	9 out of 544 genes, 1.7%	16 out of 4922 background genes, 0.3%	0.00421	0	WT levels	UGA2/YBR006W:LYS2/YBR115C:ARG5,6/YER069W:ALD5/YER073W:TDH1/YJL052W:ALD3/YMR169C:ALD2/YMR170C:YNL134C:ALD4/YOR374W
Component
GOID	GO_term	Cluster frequency	Background frequency	p-value	FDR	Status after growth resumed	Gene(s) annotated to the term
5730	nucleolus	74 out of 544 genes, 13.6%	244 out of 4922 background genes, 5.0%	6.49e-15	0	up-regulated	MAK16/YAL025C:ECM1/YAL059W:YBL028C:RPB5/YBR154C:ENP1/YBR247C:YCR016W:RRP43/YCR035C:YCR087C-A:DBP10/YDL031W:NHP2/YDL208W:NOP6/YDL213C:RRP8/YDR083W:FCF1/YDR339C:ESF1/YDR365C:PUF6/YDR496C:NOP16/YER002W:UTP7/YER082C:GLC7/YER133W:SPT15/YER148W:LOC1/YFR001W:CGR1/YGL029W:DBP3/YGL078C:ROK1/YGL171W:UPF3/YGR072W:SLX9/YGR081C:NOP7/YGR103W:RRP3/YHR065C:SSF1/YHR066W:NOP10/YHR072W-A:RPF1/YHR088W:RPC10/YHR143W-…
30684	preribosome	52 out of 544 genes, 9.6%	176 out of 4922 background genes, 3.6%	1.62e-09	0	up-regulated	MAK16/YAL025C:ECM1/YAL059W:YBL028C:ENP1/YBR247C:DBP10/YDL031W:NOP6/YDL213C:MAK21/YDR060W:RRP8/YDR083W:FCF1/YDR339C:NOP16/YER002W:UTP7/YER082C:NSA2/YER126C:LOC1/YFR001W:CGR1/YGL029W:DBP3/YGL078C:ROK1/YGL171W:SLX9/YGR081C:NOP7/YGR103W:SSF1/YHR066W:RPF1/YHR088W:IMP3/YHR148W:SQT1/YIR012W:YVH1/YIR026C:NOP9/YJL010C:HCA4/YJL033W:MRT4/YKL009W:UTP11/YKL099C:EBP2/YKL172W:UTP30/YKR060W:NOC3/YLR002C:RLP24/YL…
30687	preribosome, large subunit precursor	32 out of 544 genes, 5.9%	85 out of 4922 background genes, 1.7%	2.25e-08	0	up-regulated	MAK16/YAL025C:ECM1/YAL059W:YBL028C:DBP10/YDL031W:NOP6/YDL213C:MAK21/YDR060W:RRP8/YDR083W:NOP16/YER002W:NSA2/YER126C:LOC1/YFR001W:CGR1/YGL029W:DBP3/YGL078C:NOP7/YGR103W:SSF1/YHR066W:RPF1/YHR088W:SQT1/YIR012W:YVH1/YIR026C:MRT4/YKL009W:EBP2/YKL172W:NOC3/YLR002C:RLP24/YLR009W:SDO1/YLR022C:ERB1/YMR049C:HAS1/YMR290C:RLP7/YNL002C:NOP15/YNL110C:RRS1/YOR294W:NOP4/YPL043W:NIP7/YPL211W:NEW1/YPL226W:TIF6/YPR…
30686	90S preribosome	23 out of 544 genes, 4.2%	85 out of 4922 background genes, 1.7%	0.00726	0	up-regulated	ENP1/YBR247C:NOP6/YDL213C:MAK21/YDR060W:RRP8/YDR083W:UTP7/YER082C:ROK1/YGL171W:SLX9/YGR081C:NOP7/YGR103W:IMP3/YHR148W:NOP9/YJL010C:UTP30/YKR060W:CBF5/YLR175W:NOP56/YLR197W:BUD22/YMR014W:ERB1/YMR049C:ECM16/YMR128W:HAS1/YMR290C:IMP4/YNL075W:KRI1/YNL308C:BUD21/YOR078W:PNO1/YOR145C:RRP36/YOR287C:BMS1/YPL217C
Note: Only S. uvarum genes that have S. cerevisiae homologs are included in this GO-term analysis. The background gene set was adjusted in this way as well. GO-term analysis was conducted in SGD (http://www.yeastgenome.org/cgi-bin/GO/goTermFinder.pl)

## Sheet: 4h_DnMut
GO-Term enriched for genes that are two-folds down-regulated in S. uvarum gal80∆ gal80b∆ relative to wild-type at FDR=0.05 during TGA
Process
GOID	GO_term	Cluster frequency	Background frequency	p-value	FDR	Status after growth resumed	Gene(s) annotated to the term
7005	mitochondrion organization	96 out of 361 genes, 26.6%	366 out of 4922 background genes, 7.4%	7.25e-29	0	WT levels	PET112/YBL080C:CBP6/YBR120C:MRPL36/YBR122C:MRPS9/YBR146W:OM14/YBR230C:MRPS5/YBR251W:MRPL37/YBR268W:MRPL32/YCR003W:IMG1/YCR046C:HCM1/YCR065W:SLM3/YDL033C:CRD1/YDL142C:MRX14/YDR115W:MRPL1/YDR116C:NUM1/YDR150W:MRPL7/YDR237W:MHR1/YDR296W:MRPL35/YDR322W:MRPS28/YDR337W:MRP1/YDR347W:BCS1/YDR375C:MRP20/YDR405W:MRPL28/YDR462W:MZM1/YDR493W:SDH7/YDR511W:OXA1/YER154W:MDJ1/YFL016C:MNP1/YGL068W:MRF1/YGL143C:MT…
32543	mitochondrial translation	53 out of 361 genes, 14.7%	122 out of 4922 background genes, 2.5%	2.89e-26	0	WT levels	PET112/YBL080C:CBP6/YBR120C:MRPL36/YBR122C:MRPS9/YBR146W:MRPS5/YBR251W:MRPL37/YBR268W:MRPL32/YCR003W:IMG1/YCR046C:MRX14/YDR115W:MRPL1/YDR116C:MRPL7/YDR237W:MHR1/YDR296W:MRPL35/YDR322W:MRPS28/YDR337W:MRP1/YDR347W:MRP20/YDR405W:MRPL28/YDR462W:MNP1/YGL068W:MRF1/YGL143C:MRP13/YGR084C:MRPS35/YGR165W:MRPL9/YGR220C:PET54/YGR222W:MRP4/YHL004W:MAM33/YIL070C:RSM25/YIL093C:MRPL8/YJL063C:MRPL49/YJL096W:RSM26…
6996	organelle organization	171 out of 361 genes, 47.4%	1375 out of 4922 background genes, 27.9%	2.65e-13	0	WT levels	DEP1/YAL013W:ATS1/YAL020C:PET112/YBL080C:CBP6/YBR120C:MRPL36/YBR122C:MRPS9/YBR146W:MCM7/YBR202W:OM14/YBR230C:PBP2/YBR233W:MRPS5/YBR251W:MRPL37/YBR268W:KCC4/YCL024W:MRPL32/YCR003W:IMG1/YCR046C:HCM1/YCR065W:SED4/YCR067C:MCD1/YDL003W:SLM3/YDL033C:SIR2/YDL042C:CRD1/YDL142C:CDC9/YDL164C:CDC13/YDL220C:MSH6/YDR097C:PDS1/YDR113C:MRX14/YDR115W:MRPL1/YDR116C:FIN1/YDR130C:SWI5/YDR146C:NUM1/YDR150W:CPR1/YDR1…
44711	single-organism biosynthetic process	114 out of 361 genes, 31.6%	749 out of 4922 background genes, 15.2%	2.68e-13	0	WT levels	DEP1/YAL013W:BDH1/YAL060W:PET112/YBL080C:COQ1/YBR003W:ETR1/YBR026C:CHS2/YBR038W:CBP6/YBR120C:MRPL36/YBR122C:MRPS9/YBR146W:MCM7/YBR202W:MET8/YBR213W:ROT2/YBR229C:MRPS5/YBR251W:MRPL37/YBR268W:MRPL32/YCR003W:IMG1/YCR046C:CRD1/YDL142C:CDC13/YDL220C:MRX14/YDR115W:MRPL1/YDR116C:MRPL7/YDR237W:MHR1/YDR296W:ATP5/YDR298C:MRPL35/YDR322W:MRPS28/YDR337W:MRP1/YDR347W:MRP20/YDR405W:MRPL28/YDR462W:SAM2/YDR502C:S…
1902589	single-organism organelle organization	125 out of 361 genes, 34.6%	929 out of 4922 background genes, 18.9%	1.18e-10	0	WT levels	DEP1/YAL013W:ATS1/YAL020C:PET112/YBL080C:CBP6/YBR120C:MRPL36/YBR122C:MRPS9/YBR146W:PBP2/YBR233W:MRPS5/YBR251W:MRPL37/YBR268W:MRPL32/YCR003W:IMG1/YCR046C:HCM1/YCR065W:SED4/YCR067C:MCD1/YDL003W:SLM3/YDL033C:CRD1/YDL142C:CDC9/YDL164C:CDC13/YDL220C:MSH6/YDR097C:PDS1/YDR113C:MRX14/YDR115W:MRPL1/YDR116C:FIN1/YDR130C:SWI5/YDR146C:NUM1/YDR150W:CPR1/YDR155C:MRPL7/YDR237W:MHR1/YDR296W:MRPL35/YDR322W:MRPS28…
44763	single-organism cellular process	264 out of 361 genes, 73.1%	2735 out of 4922 background genes, 55.6%	7.57e-10	0	WT levels	DEP1/YAL013W:ATS1/YAL020C:HAP3/YBL021C:PET9/YBL030C:PET112/YBL080C:COQ1/YBR003W:ETR1/YBR026C:CHS2/YBR038W:CBP6/YBR120C:MRPL36/YBR122C:MRPS9/YBR146W:MCM7/YBR202W:MET8/YBR213W:ROT2/YBR229C:PBP2/YBR233W:MRPS5/YBR251W:MRPL37/YBR268W:STP22/YCL008C:KCC4/YCL024W:MRPL32/YCR003W:IMG1/YCR046C:YCR061W:HCM1/YCR065W:SED4/YCR067C:MCD1/YDL003W:SLM3/YDL033C:SIR2/YDL042C:DUN1/YDL101C:CDC53/YDL132W:CRD1/YDL142C:CD…
16043	cellular component organization	196 out of 361 genes, 54.3%	1828 out of 4922 background genes, 37.1%	4.59e-09	0	WT levels	DEP1/YAL013W:ATS1/YAL020C:CYC3/YAL039C:PIM1/YBL022C:PET112/YBL080C:SCO1/YBR037C:CBP6/YBR120C:MRPL36/YBR122C:MRPS9/YBR146W:MCM7/YBR202W:OM14/YBR230C:PBP2/YBR233W:MRPS5/YBR251W:MRPL37/YBR268W:STP22/YCL008C:KCC4/YCL024W:MRPL32/YCR003W:IMG1/YCR046C:TAH1/YCR060W:YCR061W:HCM1/YCR065W:SED4/YCR067C:MCD1/YDL003W:SLM3/YDL033C:SIR2/YDL042C:TMA17/YDL110C:CRD1/YDL142C:CDC9/YDL164C:CDC13/YDL220C:HBT1/YDL223C:M…
44710	single-organism metabolic process	175 out of 361 genes, 48.5%	1591 out of 4922 background genes, 32.3%	2.65e-08	0	WT levels	DEP1/YAL013W:BDH1/YAL060W:HAP3/YBL021C:PET9/YBL030C:PET112/YBL080C:COQ1/YBR003W:ETR1/YBR026C:CHS2/YBR038W:CBP6/YBR120C:MRPL36/YBR122C:MRPS9/YBR146W:MCM7/YBR202W:MET8/YBR213W:ROT2/YBR229C:PBP2/YBR233W:MRPS5/YBR251W:MRPL37/YBR268W:MRPL32/YCR003W:IMG1/YCR046C:MCD1/YDL003W:SLM3/YDL033C:CRD1/YDL142C:CDC9/YDL164C:DLD1/YDL174C:CDC13/YDL220C:MSH6/YDR097C:PDS1/YDR113C:MRX14/YDR115W:MRPL1/YDR116C:SWI5/YDR1…
44699	single-organism process	283 out of 361 genes, 78.4%	3098 out of 4922 background genes, 62.9%	4.5e-08	0	WT levels	DEP1/YAL013W:ATS1/YAL020C:BDH1/YAL060W:HAP3/YBL021C:PET9/YBL030C:PET112/YBL080C:COQ1/YBR003W:ETR1/YBR026C:SCO1/YBR037C:CHS2/YBR038W:CBP6/YBR120C:MRPL36/YBR122C:MRPS9/YBR146W:MCM7/YBR202W:MET8/YBR213W:ROT2/YBR229C:OM14/YBR230C:PBP2/YBR233W:MRPS5/YBR251W:MRPL37/YBR268W:STP22/YCL008C:KCC4/YCL024W:MRPL32/YCR003W:IMG1/YCR046C:YCR061W:HCM1/YCR065W:SED4/YCR067C:MCD1/YDL003W:SLM3/YDL033C:SIR2/YDL042C:DUN…
278	mitotic cell cycle	51 out of 361 genes, 14.1%	309 out of 4922 background genes, 6.3%	1.47e-05	0	WT levels	KCC4/YCL024W:MCD1/YDL003W:CDC53/YDL132W:CDC9/YDL164C:PDS1/YDR113C:FIN1/YDR130C:SWI5/YDR146C:SPC110/YDR356W:PAC11/YDR488C:GIN4/YDR507C:CIN8/YEL061C:SMC1/YFL008W:ALK1/YGL021W:SAP4/YGL229C:BUD9/YGR041W:RME1/YGR044C:CLB6/YGR109C:KEL1/YHR158C:IRR1/YIL026C:FKH1/YIL131C:AXL2/YIL140W:MPS3/YJL019W:SMC3/YJL074C:SWE1/YJL187C:CDC6/YJL194W:BUD4/YJR092W:HSL1/YKL101W:SLD2/YKL108W:ASH1/YKL185W:DYN1/YKR054C:STU2/…
7049	cell cycle	76 out of 361 genes, 21.1%	559 out of 4922 background genes, 11.4%	2.42e-05	0	WT levels	CHS2/YBR038W:MCM7/YBR202W:KCC4/YCL024W:HCM1/YCR065W:MCD1/YDL003W:DUN1/YDL101C:CDC53/YDL132W:CDC9/YDL164C:MSH6/YDR097C:PDS1/YDR113C:FIN1/YDR130C:SWI5/YDR146C:CPR1/YDR155C:SPC110/YDR356W:PAC11/YDR488C:GIN4/YDR507C:CIN8/YEL061C:SMC1/YFL008W:ALK1/YGL021W:SAP4/YGL229C:BUD9/YGR041W:RME1/YGR044C:DBF2/YGR092W:CLB6/YGR109C:RIM4/YHL024W:MYO1/YHR023W:RTT107/YHR154W:KEL1/YHR158C:IRR1/YIL026C:FKH1/YIL131C:AXL…
1903047	mitotic cell cycle process	49 out of 361 genes, 13.6%	300 out of 4922 background genes, 6.1%	4.16e-05	0	WT levels	KCC4/YCL024W:MCD1/YDL003W:CDC53/YDL132W:PDS1/YDR113C:FIN1/YDR130C:SWI5/YDR146C:SPC110/YDR356W:PAC11/YDR488C:GIN4/YDR507C:CIN8/YEL061C:SMC1/YFL008W:ALK1/YGL021W:SAP4/YGL229C:BUD9/YGR041W:RME1/YGR044C:CLB6/YGR109C:KEL1/YHR158C:IRR1/YIL026C:FKH1/YIL131C:AXL2/YIL140W:MPS3/YJL019W:SMC3/YJL074C:SWE1/YJL187C:CDC6/YJL194W:BUD4/YJR092W:HSL1/YKL101W:SLD2/YKL108W:ASH1/YKL185W:DYN1/YKR054C:STU2/YLR045C:RAX2/…
22402	cell cycle process	71 out of 361 genes, 19.7%	534 out of 4922 background genes, 10.8%	0.0002	0	WT levels	CHS2/YBR038W:MCM7/YBR202W:KCC4/YCL024W:HCM1/YCR065W:MCD1/YDL003W:DUN1/YDL101C:CDC53/YDL132W:MSH6/YDR097C:PDS1/YDR113C:FIN1/YDR130C:SWI5/YDR146C:CPR1/YDR155C:SPC110/YDR356W:PAC11/YDR488C:GIN4/YDR507C:CIN8/YEL061C:SMC1/YFL008W:ALK1/YGL021W:SAP4/YGL229C:BUD9/YGR041W:RME1/YGR044C:DBF2/YGR092W:CLB6/YGR109C:RIM4/YHL024W:MYO1/YHR023W:RTT107/YHR154W:KEL1/YHR158C:IRR1/YIL026C:FKH1/YIL131C:AXL2/YIL140W:MPS…
71840	cellular component organization or biogenesis	199 out of 361 genes, 55.1%	2087 out of 4922 background genes, 42.4%	0.00031	0	WT levels	DEP1/YAL013W:ATS1/YAL020C:CYC3/YAL039C:PIM1/YBL022C:PET112/YBL080C:SCO1/YBR037C:CBP6/YBR120C:MRPL36/YBR122C:MRPS9/YBR146W:MCM7/YBR202W:ROT2/YBR229C:OM14/YBR230C:PBP2/YBR233W:MRPS5/YBR251W:MRPL37/YBR268W:STP22/YCL008C:KCC4/YCL024W:MRPL32/YCR003W:IMG1/YCR046C:TAH1/YCR060W:YCR061W:HCM1/YCR065W:SED4/YCR067C:MCD1/YDL003W:SLM3/YDL033C:SIR2/YDL042C:TMA17/YDL110C:CRD1/YDL142C:CDC9/YDL164C:CDC13/YDL220C:H…
6412	translation	56 out of 361 genes, 15.5%	388 out of 4922 background genes, 7.9%	0.00034	0	up-regulated	PET112/YBL080C:CBP6/YBR120C:MRPL36/YBR122C:MRPS9/YBR146W:MRPS5/YBR251W:MRPL37/YBR268W:MRPL32/YCR003W:IMG1/YCR046C:MRX14/YDR115W:MRPL1/YDR116C:MRPL7/YDR237W:MHR1/YDR296W:MRPL35/YDR322W:MRPS28/YDR337W:MRP1/YDR347W:MRP20/YDR405W:MRPL28/YDR462W:MNP1/YGL068W:RMD9/YGL107C:MRF1/YGL143C:MRP13/YGR084C:MRPS35/YGR165W:MRPL9/YGR220C:PET54/YGR222W:MRP4/YHL004W:MAM33/YIL070C:RSM25/YIL093C:MRPL8/YJL063C:MRPL49/…
45333	cellular respiration	19 out of 361 genes, 5.3%	70 out of 4922 background genes, 1.4%	0.00036	0	WT levels	HAP3/YBL021C:PET9/YBL030C:ETR1/YBR026C:RIP1/YEL024W:QCR6/YFR033C:RMD9/YGL107C:LSC2/YGR244C:MAM33/YIL070C:KGD1/YIL125W:CYC1/YJR048W:MDH1/YKL085W:SDH1/YKL148C:ACO1/YLR304C:COQ5/YML110C:NDI1/YML120C:COX5A/YNL052W:LSC1/YOR142W:HAP5/YOR358W:FUM1/YPL262W
43043	peptide biosynthetic process	56 out of 361 genes, 15.5%	392 out of 4922 background genes, 8.0%	0.00048	0	up-regulated	PET112/YBL080C:CBP6/YBR120C:MRPL36/YBR122C:MRPS9/YBR146W:MRPS5/YBR251W:MRPL37/YBR268W:MRPL32/YCR003W:IMG1/YCR046C:MRX14/YDR115W:MRPL1/YDR116C:MRPL7/YDR237W:MHR1/YDR296W:MRPL35/YDR322W:MRPS28/YDR337W:MRP1/YDR347W:MRP20/YDR405W:MRPL28/YDR462W:MNP1/YGL068W:RMD9/YGL107C:MRF1/YGL143C:MRP13/YGR084C:MRPS35/YGR165W:MRPL9/YGR220C:PET54/YGR222W:MRP4/YHL004W:MAM33/YIL070C:RSM25/YIL093C:MRPL8/YJL063C:MRPL49/…
6518	peptide metabolic process	58 out of 361 genes, 16.1%	415 out of 4922 background genes, 8.4%	0.00062	0	up-regulated	PET112/YBL080C:CBP6/YBR120C:MRPL36/YBR122C:MRPS9/YBR146W:MRPS5/YBR251W:MRPL37/YBR268W:MRPL32/YCR003W:IMG1/YCR046C:MRX14/YDR115W:MRPL1/YDR116C:MRPL7/YDR237W:MHR1/YDR296W:MRPL35/YDR322W:MRPS28/YDR337W:MRP1/YDR347W:MRP20/YDR405W:MRPL28/YDR462W:DUG1/YFR044C:MNP1/YGL068W:RMD9/YGL107C:MRF1/YGL143C:MRP13/YGR084C:PCP1/YGR101W:MRPS35/YGR165W:MRPL9/YGR220C:PET54/YGR222W:MRP4/YHL004W:MAM33/YIL070C:RSM25/YIL…
43604	amide biosynthetic process	58 out of 361 genes, 16.1%	424 out of 4922 background genes, 8.6%	0.00128	0	up-regulated	PET112/YBL080C:CBP6/YBR120C:MRPL36/YBR122C:MRPS9/YBR146W:MRPS5/YBR251W:MRPL37/YBR268W:MRPL32/YCR003W:IMG1/YCR046C:MRX14/YDR115W:MRPL1/YDR116C:MRPL7/YDR237W:MHR1/YDR296W:MRPL35/YDR322W:MRPS28/YDR337W:MRP1/YDR347W:MRP20/YDR405W:MRPL28/YDR462W:ISC1/YER019W:MNP1/YGL068W:RMD9/YGL107C:MRF1/YGL143C:MRP13/YGR084C:MRPS35/YGR165W:MRPL9/YGR220C:PET54/YGR222W:MRP4/YHL004W:MAM33/YIL070C:RSM25/YIL093C:MRPL8/YJ…
43603	cellular amide metabolic process	60 out of 361 genes, 16.6%	463 out of 4922 background genes, 9.4%	0.00507	0	up-regulated	PET112/YBL080C:CBP6/YBR120C:MRPL36/YBR122C:MRPS9/YBR146W:MRPS5/YBR251W:MRPL37/YBR268W:MRPL32/YCR003W:IMG1/YCR046C:MRX14/YDR115W:MRPL1/YDR116C:MRPL7/YDR237W:MHR1/YDR296W:MRPL35/YDR322W:MRPS28/YDR337W:MRP1/YDR347W:MRP20/YDR405W:MRPL28/YDR462W:ISC1/YER019W:DUG1/YFR044C:MNP1/YGL068W:RMD9/YGL107C:MRF1/YGL143C:MRP13/YGR084C:PCP1/YGR101W:MRPS35/YGR165W:MRPL9/YGR220C:PET54/YGR222W:MRP4/YHL004W:MAM33/YIL0…
Function
GOID	GO_term	Cluster frequency	Background frequency	p-value	FDR	Status after growth resumed	Gene(s) annotated to the term
3735	structural constituent of ribosome	40 out of 361 genes, 11.1%	204 out of 4922 background genes, 4.1%	1.14e-06	0	up-regulated	MRPL36/YBR122C:MRPS9/YBR146W:MRPS5/YBR251W:MRPL37/YBR268W:MRPL32/YCR003W:IMG1/YCR046C:MRX14/YDR115W:MRPL1/YDR116C:MRPL7/YDR237W:MHR1/YDR296W:MRPL35/YDR322W:MRPS28/YDR337W:MRP1/YDR347W:MRP20/YDR405W:MRPL28/YDR462W:MNP1/YGL068W:MRP13/YGR084C:MRPS35/YGR165W:MRPL9/YGR220C:MRP4/YHL004W:RSM25/YIL093C:MRPL8/YJL063C:MRPL49/YJL096W:RSM26/YJR101W:RSM7/YJR113C:MRPL31/YKL138C:MRPL38/YKL170W:MRPL20/YKR085C:MR…
5198	structural molecule activity	49 out of 361 genes, 13.6%	304 out of 4922 background genes, 6.2%	1.68e-05	0	up-regulated	MRPL36/YBR122C:MRPS9/YBR146W:MRPS5/YBR251W:MRPL37/YBR268W:MRPL32/YCR003W:IMG1/YCR046C:MRX14/YDR115W:MRPL1/YDR116C:FIN1/YDR130C:MRPL7/YDR237W:MHR1/YDR296W:MRPL35/YDR322W:MRPS28/YDR337W:MRP1/YDR347W:SPC110/YDR356W:MRP20/YDR405W:MRPL28/YDR462W:MNP1/YGL068W:MRP13/YGR084C:MRPS35/YGR165W:MRPL9/YGR220C:MRP4/YHL004W:RSM25/YIL093C:MRPL8/YJL063C:MRPL49/YJL096W:CIS3/YJL158C:RSM26/YJR101W:RSM7/YJR113C:MRPL31…
Component
GOID	GO_term	Cluster frequency	Background frequency	p-value	FDR	Status after growth resumed	Gene(s) annotated to the term
44429	mitochondrial part	121 out of 361 genes, 33.5%	492 out of 4922 background genes, 10.0%	1.39e-35	0	WT levels	CYC3/YAL039C:PIM1/YBL022C:PET9/YBL030C:SCO1/YBR037C:CBP6/YBR120C:MRPL36/YBR122C:MRPS9/YBR146W:OM14/YBR230C:MRPS5/YBR251W:MRPL37/YBR268W:MRPL32/YCR003W:IMG1/YCR046C:HEM25/YDL119C:DLD1/YDL174C:YDL183C:MRX14/YDR115W:MRPL1/YDR116C:CPR1/YDR155C:MRPL7/YDR237W:MHR1/YDR296W:ATP5/YDR298C:MRPL35/YDR322W:MRPS28/YDR337W:MRP1/YDR347W:BCS1/YDR375C:MRP20/YDR405W:MRPL28/YDR462W:MZM1/YDR493W:SDH7/YDR511W:RIP1/YEL…
5739	mitochondrion	176 out of 361 genes, 48.8%	1030 out of 4922 background genes, 20.9%	2.55e-32	0	WT levels	CYC3/YAL039C:FMT1/YBL013W:PIM1/YBL022C:PET9/YBL030C:PET112/YBL080C:COQ1/YBR003W:ETR1/YBR026C:SCO1/YBR037C:CBP6/YBR120C:MRPL36/YBR122C:MRPS9/YBR146W:ROT2/YBR229C:OM14/YBR230C:MRPS5/YBR251W:MRPL37/YBR268W:MRPL32/YCR003W:IMG1/YCR046C:MCD1/YDL003W:SLM3/YDL033C:HEM25/YDL119C:STF1/YDL130W-A:CRD1/YDL142C:CDC9/YDL164C:DLD1/YDL174C:INH1/YDL181W:YDL183C:EHD3/YDR036C:BAP3/YDR046C:YDR061W:MRX14/YDR115W:MRPL1…
5759	mitochondrial matrix	64 out of 361 genes, 17.7%	174 out of 4922 background genes, 3.5%	7.91e-28	0	WT levels	PIM1/YBL022C:CBP6/YBR120C:MRPL36/YBR122C:MRPS9/YBR146W:MRPS5/YBR251W:MRPL37/YBR268W:MRPL32/YCR003W:IMG1/YCR046C:MRX14/YDR115W:MRPL1/YDR116C:MRPL7/YDR237W:MHR1/YDR296W:MRPL35/YDR322W:MRPS28/YDR337W:MRP1/YDR347W:MRP20/YDR405W:MRPL28/YDR462W:MZM1/YDR493W:OXA1/YER154W:ADK2/YER170W:MDJ1/YFL016C:MRH4/YGL064C:MNP1/YGL068W:MRP13/YGR084C:MRPS35/YGR165W:MRPL9/YGR220C:PET54/YGR222W:MRP4/YHL004W:PUT2/YHR037W…
313	organellar ribosome	44 out of 361 genes, 12.2%	84 out of 4922 background genes, 1.7%	2.65e-26	0	WT levels	CBP6/YBR120C:MRPL36/YBR122C:MRPS9/YBR146W:MRPS5/YBR251W:MRPL37/YBR268W:MRPL32/YCR003W:IMG1/YCR046C:MRX14/YDR115W:MRPL1/YDR116C:MRPL7/YDR237W:MHR1/YDR296W:MRPL35/YDR322W:MRPS28/YDR337W:MRP1/YDR347W:MRP20/YDR405W:MRPL28/YDR462W:OXA1/YER154W:MRH4/YGL064C:MNP1/YGL068W:MRP13/YGR084C:MRPS35/YGR165W:MRPL9/YGR220C:MRP4/YHL004W:RSM25/YIL093C:MRPL8/YJL063C:MRPL49/YJL096W:RSM26/YJR101W:RSM7/YJR113C:MRPL31/Y…
5761	mitochondrial ribosome	44 out of 361 genes, 12.2%	84 out of 4922 background genes, 1.7%	2.65e-26	0	WT levels	CBP6/YBR120C:MRPL36/YBR122C:MRPS9/YBR146W:MRPS5/YBR251W:MRPL37/YBR268W:MRPL32/YCR003W:IMG1/YCR046C:MRX14/YDR115W:MRPL1/YDR116C:MRPL7/YDR237W:MHR1/YDR296W:MRPL35/YDR322W:MRPS28/YDR337W:MRP1/YDR347W:MRP20/YDR405W:MRPL28/YDR462W:OXA1/YER154W:MRH4/YGL064C:MNP1/YGL068W:MRP13/YGR084C:MRPS35/YGR165W:MRPL9/YGR220C:MRP4/YHL004W:RSM25/YIL093C:MRPL8/YJL063C:MRPL49/YJL096W:RSM26/YJR101W:RSM7/YJR113C:MRPL31/Y…
315	organellar large ribosomal subunit	29 out of 361 genes, 8.0%	46 out of 4922 background genes, 0.9%	6.06e-20	0	WT levels	MRPL36/YBR122C:MRPL37/YBR268W:MRPL32/YCR003W:IMG1/YCR046C:MRX14/YDR115W:MRPL1/YDR116C:MRPL7/YDR237W:MHR1/YDR296W:MRPL35/YDR322W:MRP20/YDR405W:MRPL28/YDR462W:OXA1/YER154W:MRH4/YGL064C:MNP1/YGL068W:MRPL9/YGR220C:MRPL8/YJL063C:MRPL49/YJL096W:MRPL31/YKL138C:MRPL38/YKL170W:MRPL20/YKR085C:MRPL15/YLR312W-A:MRPL4/YLR439W:MRPL3/YMR024W:MRPL24/YMR193W:MRPL22/YNL177C:MRPL19/YNL185C:MRPL10/YNL284C:MRPL23/YOR…
5762	mitochondrial large ribosomal subunit	29 out of 361 genes, 8.0%	46 out of 4922 background genes, 0.9%	6.06e-20	0	WT levels	MRPL36/YBR122C:MRPL37/YBR268W:MRPL32/YCR003W:IMG1/YCR046C:MRX14/YDR115W:MRPL1/YDR116C:MRPL7/YDR237W:MHR1/YDR296W:MRPL35/YDR322W:MRP20/YDR405W:MRPL28/YDR462W:OXA1/YER154W:MRH4/YGL064C:MNP1/YGL068W:MRPL9/YGR220C:MRPL8/YJL063C:MRPL49/YJL096W:MRPL31/YKL138C:MRPL38/YKL170W:MRPL20/YKR085C:MRPL15/YLR312W-A:MRPL4/YLR439W:MRPL3/YMR024W:MRPL24/YMR193W:MRPL22/YNL177C:MRPL19/YNL185C:MRPL10/YNL284C:MRPL23/YOR…
5740	mitochondrial envelope	62 out of 361 genes, 17.2%	338 out of 4922 background genes, 6.9%	6.79e-10	0	WT levels	CYC3/YAL039C:PET9/YBL030C:SCO1/YBR037C:OM14/YBR230C:MRPL32/YCR003W:HEM25/YDL119C:DLD1/YDL174C:YDL183C:CPR1/YDR155C:ATP5/YDR298C:BCS1/YDR375C:SDH7/YDR511W:RIP1/YEL024W:ISC1/YER019W:CHO1/YER026C:ICP55/YER078C:COX15/YER141W:OXA1/YER154W:ADK2/YER170W:MDJ1/YFL016C:QCR6/YFR033C:RMD9/YGL107C:PIL1/YGR086C:PCP1/YGR101W:SHY1/YGR112W:PET54/YGR222W:PHB2/YGR231C:COQ6/YGR255C:YGR266W:SAM35/YHR083W:TOM71/YHR117…
31966	mitochondrial membrane	54 out of 361 genes, 15.0%	287 out of 4922 background genes, 5.8%	7.87e-09	0	WT levels	PET9/YBL030C:SCO1/YBR037C:OM14/YBR230C:MRPL32/YCR003W:HEM25/YDL119C:DLD1/YDL174C:YDL183C:ATP5/YDR298C:BCS1/YDR375C:RIP1/YEL024W:ISC1/YER019W:CHO1/YER026C:ICP55/YER078C:COX15/YER141W:OXA1/YER154W:ADK2/YER170W:MDJ1/YFL016C:QCR6/YFR033C:RMD9/YGL107C:PIL1/YGR086C:PCP1/YGR101W:SHY1/YGR112W:PET54/YGR222W:PHB2/YGR231C:COQ6/YGR255C:YGR266W:SAM35/YHR083W:TOM71/YHR117W:ERG9/YHR190W:MDM31/YHR194W:YIA6/YIL00…
44391	ribosomal subunit	42 out of 361 genes, 11.6%	222 out of 4922 background genes, 4.5%	1.32e-06	0	up-regulated	MRPL36/YBR122C:MRPS9/YBR146W:MRPS5/YBR251W:MRPL37/YBR268W:MRPL32/YCR003W:IMG1/YCR046C:MRX14/YDR115W:MRPL1/YDR116C:MRPL7/YDR237W:MHR1/YDR296W:MRPL35/YDR322W:MRPS28/YDR337W:MRP1/YDR347W:MRP20/YDR405W:MRPL28/YDR462W:OXA1/YER154W:MRH4/YGL064C:MNP1/YGL068W:MRP13/YGR084C:MRPS35/YGR165W:MRPL9/YGR220C:MRP4/YHL004W:RSM25/YIL093C:MRPL8/YJL063C:MRPL49/YJL096W:RSM26/YJR101W:RSM7/YJR113C:MRPL31/YKL138C:MRPL38…
5743	mitochondrial inner membrane	38 out of 361 genes, 10.5%	190 out of 4922 background genes, 3.9%	1.52e-06	0	WT levels	PET9/YBL030C:SCO1/YBR037C:MRPL32/YCR003W:HEM25/YDL119C:DLD1/YDL174C:YDL183C:ATP5/YDR298C:BCS1/YDR375C:RIP1/YEL024W:ICP55/YER078C:COX15/YER141W:OXA1/YER154W:ADK2/YER170W:MDJ1/YFL016C:QCR6/YFR033C:RMD9/YGL107C:PCP1/YGR101W:SHY1/YGR112W:PET54/YGR222W:PHB2/YGR231C:COQ6/YGR255C:MDM31/YHR194W:YIA6/YIL006W:TIM44/YIL022W:COA1/YIL157C:SSC1/YJR045C:AIM24/YJR080C:ATP7/YKL016C:SDH1/YKL148C:MIA40/YKL195W:UPS2…
19866	organelle inner membrane	38 out of 361 genes, 10.5%	199 out of 4922 background genes, 4.0%	5.82e-06	0	WT levels	PET9/YBL030C:SCO1/YBR037C:MRPL32/YCR003W:HEM25/YDL119C:DLD1/YDL174C:YDL183C:ATP5/YDR298C:BCS1/YDR375C:RIP1/YEL024W:ICP55/YER078C:COX15/YER141W:OXA1/YER154W:ADK2/YER170W:MDJ1/YFL016C:QCR6/YFR033C:RMD9/YGL107C:PCP1/YGR101W:SHY1/YGR112W:PET54/YGR222W:PHB2/YGR231C:COQ6/YGR255C:MDM31/YHR194W:YIA6/YIL006W:TIM44/YIL022W:COA1/YIL157C:SSC1/YJR045C:AIM24/YJR080C:ATP7/YKL016C:SDH1/YKL148C:MIA40/YKL195W:UPS2…
31967	organelle envelope	65 out of 361 genes, 18.0%	451 out of 4922 background genes, 9.2%	8.1e-06	0	WT levels	CYC3/YAL039C:PET9/YBL030C:SCO1/YBR037C:OM14/YBR230C:MRPL32/YCR003W:HEM25/YDL119C:DLD1/YDL174C:YDL183C:CPR1/YDR155C:ATP5/YDR298C:BCS1/YDR375C:SDH7/YDR511W:RIP1/YEL024W:ISC1/YER019W:CHO1/YER026C:ICP55/YER078C:COX15/YER141W:OXA1/YER154W:ADK2/YER170W:MDJ1/YFL016C:QCR6/YFR033C:RMD9/YGL107C:PIL1/YGR086C:PCP1/YGR101W:SHY1/YGR112W:PET54/YGR222W:PHB2/YGR231C:COQ6/YGR255C:YGR266W:PTC7/YHR076W:SAM35/YHR083W…
31975	envelope	65 out of 361 genes, 18.0%	451 out of 4922 background genes, 9.2%	8.1e-06	0	WT levels	CYC3/YAL039C:PET9/YBL030C:SCO1/YBR037C:OM14/YBR230C:MRPL32/YCR003W:HEM25/YDL119C:DLD1/YDL174C:YDL183C:CPR1/YDR155C:ATP5/YDR298C:BCS1/YDR375C:SDH7/YDR511W:RIP1/YEL024W:ISC1/YER019W:CHO1/YER026C:ICP55/YER078C:COX15/YER141W:OXA1/YER154W:ADK2/YER170W:MDJ1/YFL016C:QCR6/YFR033C:RMD9/YGL107C:PIL1/YGR086C:PCP1/YGR101W:SHY1/YGR112W:PET54/YGR222W:PHB2/YGR231C:COQ6/YGR255C:YGR266W:PTC7/YHR076W:SAM35/YHR083W…
15934	large ribosomal subunit	29 out of 361 genes, 8.0%	130 out of 4922 background genes, 2.6%	8.69e-06	0	up-regulated	MRPL36/YBR122C:MRPL37/YBR268W:MRPL32/YCR003W:IMG1/YCR046C:MRX14/YDR115W:MRPL1/YDR116C:MRPL7/YDR237W:MHR1/YDR296W:MRPL35/YDR322W:MRP20/YDR405W:MRPL28/YDR462W:OXA1/YER154W:MRH4/YGL064C:MNP1/YGL068W:MRPL9/YGR220C:MRPL8/YJL063C:MRPL49/YJL096W:MRPL31/YKL138C:MRPL38/YKL170W:MRPL20/YKR085C:MRPL15/YLR312W-A:MRPL4/YLR439W:MRPL3/YMR024W:MRPL24/YMR193W:MRPL22/YNL177C:MRPL19/YNL185C:MRPL10/YNL284C:MRPL23/YOR…
5840	ribosome	50 out of 361 genes, 13.9%	318 out of 4922 background genes, 6.5%	2.59e-05	0	up-regulated	CBP6/YBR120C:MRPL36/YBR122C:MRPS9/YBR146W:MRPS5/YBR251W:MRPL37/YBR268W:MRPL32/YCR003W:IMG1/YCR046C:YIH1/YCR059C:TMA17/YDL110C:MRX14/YDR115W:MRPL1/YDR116C:MRPL7/YDR237W:MHR1/YDR296W:MRPL35/YDR322W:MRPS28/YDR337W:MRP1/YDR347W:MRP20/YDR405W:MRPL28/YDR462W:OXA1/YER154W:DUG1/YFR044C:MRH4/YGL064C:MNP1/YGL068W:MRP13/YGR084C:MRPS35/YGR165W:MRPL9/YGR220C:MRP4/YHL004W:RSM25/YIL093C:MRPL8/YJL063C:MRPL49/YJL…
314	organellar small ribosomal subunit	13 out of 361 genes, 3.6%	32 out of 4922 background genes, 0.7%	3.57e-05	0	WT levels	MRPS9/YBR146W:MRPS5/YBR251W:MRPS28/YDR337W:MRP1/YDR347W:MRP13/YGR084C:MRPS35/YGR165W:MRP4/YHL004W:RSM25/YIL093C:RSM26/YJR101W:RSM7/YJR113C:NAM9/YNL137C:MRPS12/YNR036C:RSM19/YNR037C
5763	mitochondrial small ribosomal subunit	13 out of 361 genes, 3.6%	32 out of 4922 background genes, 0.7%	3.57e-05	0	WT levels	MRPS9/YBR146W:MRPS5/YBR251W:MRPS28/YDR337W:MRP1/YDR347W:MRP13/YGR084C:MRPS35/YGR165W:MRP4/YHL004W:RSM25/YIL093C:RSM26/YJR101W:RSM7/YJR113C:NAM9/YNL137C:MRPS12/YNR036C:RSM19/YNR037C
44455	mitochondrial membrane part	31 out of 361 genes, 8.6%	156 out of 4922 background genes, 3.2%	4.89e-05	0	WT levels	OM14/YBR230C:YDL183C:ATP5/YDR298C:RIP1/YEL024W:ISC1/YER019W:ICP55/YER078C:OXA1/YER154W:MDJ1/YFL016C:QCR6/YFR033C:RMD9/YGL107C:PET54/YGR222W:SAM35/YHR083W:TOM71/YHR117W:TIM44/YIL022W:COA1/YIL157C:SSC1/YJR045C:AIM24/YJR080C:ATP7/YKL016C:SDH1/YKL148C:MIA40/YKL195W:UPS2/YLR168C:QRI5/YLR204W:MCP2/YLR253W:TOM40/YMR203W:SAM50/YNL026W:COX5A/YNL052W:MIC27/YNL100W:TOM22/YNL131W:PSD1/YNL169C:COQ2/YNR041C:AT…
44444	cytoplasmic part	248 out of 361 genes, 68.7%	2756 out of 4922 background genes, 56.0%	5.16e-05	0	WT levels	CYC3/YAL039C:FMT1/YBL013W:PIM1/YBL022C:PET9/YBL030C:PET112/YBL080C:COQ1/YBR003W:ETR1/YBR026C:SCO1/YBR037C:CBP6/YBR120C:MRPL36/YBR122C:MRPS9/YBR146W:ROT2/YBR229C:OM14/YBR230C:MRPS5/YBR251W:MRPL37/YBR268W:STP22/YCL008C:KCC4/YCL024W:MRPL32/YCR003W:IMG1/YCR046C:YIH1/YCR059C:SED4/YCR067C:MCD1/YDL003W:SLM3/YDL033C:TMA17/YDL110C:HEM25/YDL119C:STF1/YDL130W-A:CRD1/YDL142C:CDC9/YDL164C:DLD1/YDL174C:YDL180W…
5737	cytoplasm	304 out of 361 genes, 84.2%	3624 out of 4922 background genes, 73.6%	0.00012	0	WT levels	ATS1/YAL020C:CYC3/YAL039C:BDH1/YAL060W:FMT1/YBL013W:PIM1/YBL022C:PET9/YBL030C:PET112/YBL080C:COQ1/YBR003W:ETR1/YBR026C:SCO1/YBR037C:CBP6/YBR120C:MRPL36/YBR122C:MRPS9/YBR146W:MCM7/YBR202W:ROT2/YBR229C:OM14/YBR230C:PBP2/YBR233W:MRPS5/YBR251W:MRPL37/YBR268W:STP22/YCL008C:KCC4/YCL024W:MRPL32/YCR003W:IMG1/YCR046C:YIH1/YCR059C:TAH1/YCR060W:YCR061W:HCM1/YCR065W:SED4/YCR067C:MCD1/YDL003W:SLM3/YDL033C:QRI…
31974	membrane-enclosed lumen	107 out of 361 genes, 29.6%	972 out of 4922 background genes, 19.7%	0.00049	0	WT levels	DEP1/YAL013W:CYC3/YAL039C:PIM1/YBL022C:CBP6/YBR120C:MRPL36/YBR122C:MRPS9/YBR146W:MCM7/YBR202W:ROT2/YBR229C:MRPS5/YBR251W:MRPL37/YBR268W:MRPL32/YCR003W:IMG1/YCR046C:HCM1/YCR065W:MCD1/YDL003W:SIR2/YDL042C:CDC13/YDL220C:MRX14/YDR115W:MRPL1/YDR116C:FIN1/YDR130C:CPR1/YDR155C:HTA1/YDR225W:MRPL7/YDR237W:MHR1/YDR296W:MRPL35/YDR322W:MRPS28/YDR337W:MRP1/YDR347W:MRP20/YDR405W:MRPL28/YDR462W:MZM1/YDR493W:SDH…
43231	intracellular membrane-bounded organelle	300 out of 361 genes, 83.1%	3627 out of 4922 background genes, 73.7%	0.00195	0	WT levels	DEP1/YAL013W:CYC3/YAL039C:FMT1/YBL013W:HAP3/YBL021C:PIM1/YBL022C:PET9/YBL030C:PET112/YBL080C:COQ1/YBR003W:ETR1/YBR026C:SCO1/YBR037C:CBP6/YBR120C:MRPL36/YBR122C:MRPS9/YBR146W:MCM7/YBR202W:ROT2/YBR229C:OM14/YBR230C:PBP2/YBR233W:MRPS5/YBR251W:MRPL37/YBR268W:STP22/YCL008C:MRPL32/YCR003W:IMG1/YCR046C:YIH1/YCR059C:TAH1/YCR060W:HCM1/YCR065W:SED4/YCR067C:MCD1/YDL003W:SLM3/YDL033C:SIR2/YDL042C:DUN1/YDL101…
43227	membrane-bounded organelle	300 out of 361 genes, 83.1%	3628 out of 4922 background genes, 73.7%	0.00203	0	WT levels	DEP1/YAL013W:CYC3/YAL039C:FMT1/YBL013W:HAP3/YBL021C:PIM1/YBL022C:PET9/YBL030C:PET112/YBL080C:COQ1/YBR003W:ETR1/YBR026C:SCO1/YBR037C:CBP6/YBR120C:MRPL36/YBR122C:MRPS9/YBR146W:MCM7/YBR202W:ROT2/YBR229C:OM14/YBR230C:PBP2/YBR233W:MRPS5/YBR251W:MRPL37/YBR268W:STP22/YCL008C:MRPL32/YCR003W:IMG1/YCR046C:YIH1/YCR059C:TAH1/YCR060W:HCM1/YCR065W:SED4/YCR067C:MCD1/YDL003W:SLM3/YDL033C:SIR2/YDL042C:DUN1/YDL101…
43229	intracellular organelle	318 out of 361 genes, 88.1%	3935 out of 4922 background genes, 79.9%	0.00414	0	WT levels	DEP1/YAL013W:CYC3/YAL039C:FMT1/YBL013W:HAP3/YBL021C:PIM1/YBL022C:PET9/YBL030C:PET112/YBL080C:COQ1/YBR003W:ETR1/YBR026C:SCO1/YBR037C:CBP6/YBR120C:MRPL36/YBR122C:MRPS9/YBR146W:MCM7/YBR202W:ROT2/YBR229C:OM14/YBR230C:PBP2/YBR233W:MRPS5/YBR251W:MRPL37/YBR268W:STP22/YCL008C:KCC4/YCL024W:MRPL32/YCR003W:IMG1/YCR046C:YIH1/YCR059C:TAH1/YCR060W:HCM1/YCR065W:SED4/YCR067C:MCD1/YDL003W:SLM3/YDL033C:SIR2/YDL042…
43226	organelle	318 out of 361 genes, 88.1%	3936 out of 4922 background genes, 80.0%	0.00431	0	WT levels	DEP1/YAL013W:CYC3/YAL039C:FMT1/YBL013W:HAP3/YBL021C:PIM1/YBL022C:PET9/YBL030C:PET112/YBL080C:COQ1/YBR003W:ETR1/YBR026C:SCO1/YBR037C:CBP6/YBR120C:MRPL36/YBR122C:MRPS9/YBR146W:MCM7/YBR202W:ROT2/YBR229C:OM14/YBR230C:PBP2/YBR233W:MRPS5/YBR251W:MRPL37/YBR268W:STP22/YCL008C:KCC4/YCL024W:MRPL32/YCR003W:IMG1/YCR046C:YIH1/YCR059C:TAH1/YCR060W:HCM1/YCR065W:SED4/YCR067C:MCD1/YDL003W:SLM3/YDL033C:SIR2/YDL042…
43233	organelle lumen	98 out of 361 genes, 27.1%	918 out of 4922 background genes, 18.7%	0.00632	0	WT levels	DEP1/YAL013W:PIM1/YBL022C:CBP6/YBR120C:MRPL36/YBR122C:MRPS9/YBR146W:MCM7/YBR202W:ROT2/YBR229C:MRPS5/YBR251W:MRPL37/YBR268W:MRPL32/YCR003W:IMG1/YCR046C:HCM1/YCR065W:MCD1/YDL003W:SIR2/YDL042C:CDC13/YDL220C:MRX14/YDR115W:MRPL1/YDR116C:FIN1/YDR130C:CPR1/YDR155C:HTA1/YDR225W:MRPL7/YDR237W:MHR1/YDR296W:MRPL35/YDR322W:MRPS28/YDR337W:MRP1/YDR347W:MRP20/YDR405W:MRPL28/YDR462W:MZM1/YDR493W:GTT3/YEL017W:CIN…
70013	intracellular organelle lumen	98 out of 361 genes, 27.1%	918 out of 4922 background genes, 18.7%	0.00632	0	WT levels	DEP1/YAL013W:PIM1/YBL022C:CBP6/YBR120C:MRPL36/YBR122C:MRPS9/YBR146W:MCM7/YBR202W:ROT2/YBR229C:MRPS5/YBR251W:MRPL37/YBR268W:MRPL32/YCR003W:IMG1/YCR046C:HCM1/YCR065W:MCD1/YDL003W:SIR2/YDL042C:CDC13/YDL220C:MRX14/YDR115W:MRPL1/YDR116C:FIN1/YDR130C:CPR1/YDR155C:HTA1/YDR225W:MRPL7/YDR237W:MHR1/YDR296W:MRPL35/YDR322W:MRPS28/YDR337W:MRP1/YDR347W:MRP20/YDR405W:MRPL28/YDR462W:MZM1/YDR493W:GTT3/YEL017W:CIN…
Note: Only S. uvarum genes that have S. cerevisiae homologs are included in this GO-term analysis. The background gene set was adjusted in this way as well. GO-term analysis was conducted in SGD (http://www.yeastgenome.org/cgi-bin/GO/goTermFinder.pl)

## Sheet: 14h_UpMut
GO-Term enriched for genes that are two-folds up-regulated in S. uvarum gal80∆ gal80b∆ relative to wild-type at FDR=0.05 after the growth resumed (mid-log phase)
Process
GOID	GO_term	Cluster frequency	Background frequency	p-value	FDR	Status at TGA	Gene(s) annotated to the term
2181	cytoplasmic translation	102 out of 251 genes, 40.6%	156 out of 4922 background genes, 3.2%	5.18e-98	0	WT levels	RBG1/YAL036C:RPL19B/YBL027W:RPL23A/YBL087C:RPL32/YBL092W:RPL4A/YBR031W:RPL19A/YBR084C-A:RPS6B/YBR181C:RPL21A/YBR191W:RPS14A/YCR031C:RPS29B/YDL061C:RPL31A/YDL075W:RPL13A/YDL082W:RPS16B/YDL083C:RPP1B/YDL130W:RPL35A/YDL191W:SSB1/YDL229W:RPL4B/YDR012W:RPS11A/YDR025W:RPS13/YDR064W:RPS18A/YDR450W:RPL27B/YDR471W:RPL12A/YEL054C:RPL34A/YER056C-A:RPS24A/YER074W:RPS8B/YER102W:RPL23B/YER117W:RPS26B/YER131W:R…
42254	ribosome biogenesis	109 out of 251 genes, 43.4%	329 out of 4922 background genes, 6.7%	6.38e-64	0	up-regulated	MAK16/YAL025C:RPS6B/YBR181C:REI1/YBR267W:KRR1/YCL059C:RPS14A/YCR031C:PWP2/YCR057C:RSA4/YCR072C:NOP1/YDL014W:TSR1/YDL060W:RPS16B/YDL083C:RRP42/YDL111C:RPL35A/YDL191W:NHP2/YDL208W:NOP6/YDL213C:SSB1/YDL229W:RPS11A/YDR025W:RPS13/YDR064W:RRP1/YDR087C:ARX1/YDR101C:UTP5/YDR398W:RRP17/YDR412W:RPS18A/YDR450W:RPL12A/YEL054C:ARB1/YER036C:RPL34A/YER056C-A:RPS24A/YER074W:RPS8B/YER102W:RPS26B/YER131W:RPL30/YGL…
6412	translation	115 out of 251 genes, 45.8%	388 out of 4922 background genes, 7.9%	4.51e-62	0	down-regulated	RBG1/YAL036C:RPL19B/YBL027W:RPL23A/YBL087C:RPL32/YBL092W:RPL4A/YBR031W:RPL19A/YBR084C-A:RPS6B/YBR181C:RPL21A/YBR191W:RPS14A/YCR031C:RPS29B/YDL061C:RPL31A/YDL075W:RPL13A/YDL082W:RPS16B/YDL083C:RPP1B/YDL130W:RPL35A/YDL191W:SSB1/YDL229W:RPL4B/YDR012W:RPS11A/YDR025W:RSM10/YDR041W:RPS13/YDR064W:RPS18A/YDR450W:RPL27B/YDR471W:RPL12A/YEL054C:RPL34A/YER056C-A:RPS24A/YER074W:RPS8B/YER102W:RPL23B/YER117W:RP…
43043	peptide biosynthetic process	115 out of 251 genes, 45.8%	392 out of 4922 background genes, 8.0%	1.61e-61	0	down-regulated	RBG1/YAL036C:RPL19B/YBL027W:RPL23A/YBL087C:RPL32/YBL092W:RPL4A/YBR031W:RPL19A/YBR084C-A:RPS6B/YBR181C:RPL21A/YBR191W:RPS14A/YCR031C:RPS29B/YDL061C:RPL31A/YDL075W:RPL13A/YDL082W:RPS16B/YDL083C:RPP1B/YDL130W:RPL35A/YDL191W:SSB1/YDL229W:RPL4B/YDR012W:RPS11A/YDR025W:RSM10/YDR041W:RPS13/YDR064W:RPS18A/YDR450W:RPL27B/YDR471W:RPL12A/YEL054C:RPL34A/YER056C-A:RPS24A/YER074W:RPS8B/YER102W:RPL23B/YER117W:RP…
43604	amide biosynthetic process	118 out of 251 genes, 47.0%	424 out of 4922 background genes, 8.6%	1.3e-60	0	down-regulated	RBG1/YAL036C:RPL19B/YBL027W:RPL23A/YBL087C:RPL32/YBL092W:RPL4A/YBR031W:RPL19A/YBR084C-A:RPS6B/YBR181C:RPL21A/YBR191W:RPS14A/YCR031C:RPS29B/YDL061C:RPL31A/YDL075W:RPL13A/YDL082W:RPS16B/YDL083C:RPP1B/YDL130W:RPL35A/YDL191W:SSB1/YDL229W:RPL4B/YDR012W:RPS11A/YDR025W:RSM10/YDR041W:RPS13/YDR064W:RPS18A/YDR450W:RPL27B/YDR471W:RPL12A/YEL054C:RPL34A/YER056C-A:RPS24A/YER074W:RPS8B/YER102W:RPL23B/YER117W:RP…
6518	peptide metabolic process	115 out of 251 genes, 45.8%	415 out of 4922 background genes, 8.4%	1.79e-58	0	down-regulated	RBG1/YAL036C:RPL19B/YBL027W:RPL23A/YBL087C:RPL32/YBL092W:RPL4A/YBR031W:RPL19A/YBR084C-A:RPS6B/YBR181C:RPL21A/YBR191W:RPS14A/YCR031C:RPS29B/YDL061C:RPL31A/YDL075W:RPL13A/YDL082W:RPS16B/YDL083C:RPP1B/YDL130W:RPL35A/YDL191W:SSB1/YDL229W:RPL4B/YDR012W:RPS11A/YDR025W:RSM10/YDR041W:RPS13/YDR064W:RPS18A/YDR450W:RPL27B/YDR471W:RPL12A/YEL054C:RPL34A/YER056C-A:RPS24A/YER074W:RPS8B/YER102W:RPL23B/YER117W:RP…
43603	cellular amide metabolic process	119 out of 251 genes, 47.4%	463 out of 4922 background genes, 9.4%	6.26e-57	0	down-regulated	RBG1/YAL036C:RPL19B/YBL027W:RPL23A/YBL087C:RPL32/YBL092W:RPL4A/YBR031W:RPL19A/YBR084C-A:RPS6B/YBR181C:RPL21A/YBR191W:RPS14A/YCR031C:RPS29B/YDL061C:RPL31A/YDL075W:RPL13A/YDL082W:RPS16B/YDL083C:RPP1B/YDL130W:RPL35A/YDL191W:SSB1/YDL229W:RPL4B/YDR012W:RPS11A/YDR025W:RSM10/YDR041W:RPS13/YDR064W:ASP1/YDR321W:RPS18A/YDR450W:RPL27B/YDR471W:RPL12A/YEL054C:RPL34A/YER056C-A:RPS24A/YER074W:RPS8B/YER102W:RPL2…
22613	ribonucleoprotein complex biogenesis	110 out of 251 genes, 43.8%	401 out of 4922 background genes, 8.1%	7.68e-55	0	up-regulated	MAK16/YAL025C:RPS6B/YBR181C:REI1/YBR267W:KRR1/YCL059C:RPS14A/YCR031C:PWP2/YCR057C:RSA4/YCR072C:NOP1/YDL014W:TSR1/YDL060W:RPS16B/YDL083C:RRP42/YDL111C:RPL35A/YDL191W:NHP2/YDL208W:NOP6/YDL213C:SSB1/YDL229W:RPS11A/YDR025W:RPS13/YDR064W:RRP1/YDR087C:ARX1/YDR101C:UTP5/YDR398W:RRP17/YDR412W:RPS18A/YDR450W:RPL12A/YEL054C:ARB1/YER036C:RPL34A/YER056C-A:RPS24A/YER074W:RPS8B/YER102W:RPS26B/YER131W:RPL30/YGL…
1901566	organonitrogen compound biosynthetic process	129 out of 251 genes, 51.4%	692 out of 4922 background genes, 14.1%	3.85e-45	0	WT levels	RBG1/YAL036C:RPL19B/YBL027W:RPL23A/YBL087C:RPL32/YBL092W:RPL4A/YBR031W:RPL19A/YBR084C-A:RPS6B/YBR181C:RPL21A/YBR191W:SHM1/YBR263W:RPS14A/YCR031C:RPS29B/YDL061C:RPL31A/YDL075W:RPL13A/YDL082W:RPS16B/YDL083C:RPP1B/YDL130W:RPL35A/YDL191W:HEM3/YDL205C:SSB1/YDL229W:RPL4B/YDR012W:RPS11A/YDR025W:RSM10/YDR041W:RPS13/YDR064W:RPS18A/YDR450W:RPL27B/YDR471W:RPL12A/YEL054C:SAH1/YER043C:HIS1/YER055C:RPL34A/YER0…
10467	gene expression	175 out of 251 genes, 69.7%	1446 out of 4922 background genes, 29.4%	3.2e-39	0	WT levels	ATS1/YAL020C:MAK16/YAL025C:RBG1/YAL036C:RPL19B/YBL027W:RPL23A/YBL087C:RPL32/YBL092W:RPL4A/YBR031W:HMT1/YBR034C:RPL19A/YBR084C-A:RPS6B/YBR181C:RPL21A/YBR191W:KRR1/YCL059C:RPS14A/YCR031C:PWP2/YCR057C:NOP1/YDL014W:SLM3/YDL033C:LHP1/YDL051W:TSR1/YDL060W:RPS29B/YDL061C:RPL31A/YDL075W:RPL13A/YDL082W:RPS16B/YDL083C:RRP42/YDL111C:TRM3/YDL112W:RPP1B/YDL130W:RPL35A/YDL191W:NHP2/YDL208W:SSB1/YDL229W:RPL4B/Y…
34470	ncRNA processing	85 out of 251 genes, 33.9%	327 out of 4922 background genes, 6.6%	3.37e-38	0	up-regulated	ATS1/YAL020C:MAK16/YAL025C:RPS6B/YBR181C:KRR1/YCL059C:RPS14A/YCR031C:PWP2/YCR057C:NOP1/YDL014W:SLM3/YDL033C:LHP1/YDL051W:TSR1/YDL060W:RPS16B/YDL083C:RRP42/YDL111C:TRM3/YDL112W:RPL35A/YDL191W:NHP2/YDL208W:SSB1/YDL229W:RPS11A/YDR025W:RPS13/YDR064W:RRP1/YDR087C:TRM1/YDR120C:UTP5/YDR398W:RRP17/YDR412W:RPS18A/YDR450W:RPS24A/YER074W:RPS8B/YER102W:RPL30/YGL030W:RPL7A/YGL076C:MTO1/YGL236C:NOP7/YGR103W:NS…
1901564	organonitrogen compound metabolic process	134 out of 251 genes, 53.4%	867 out of 4922 background genes, 17.6%	1.96e-37	0	WT levels	RBG1/YAL036C:RPL19B/YBL027W:RPL23A/YBL087C:RPL32/YBL092W:CDS1/YBR029C:RPL4A/YBR031W:RPL19A/YBR084C-A:RPS6B/YBR181C:RPL21A/YBR191W:SHM1/YBR263W:RPS14A/YCR031C:RPS29B/YDL061C:RPL31A/YDL075W:RPL13A/YDL082W:RPS16B/YDL083C:RPP1B/YDL130W:RPL35A/YDL191W:HEM3/YDL205C:SSB1/YDL229W:RPL4B/YDR012W:RPS11A/YDR025W:RSM10/YDR041W:RPS13/YDR064W:ASP1/YDR321W:RPS18A/YDR450W:RPL27B/YDR471W:RPL12A/YEL054C:SAH1/YER043…
6364	rRNA processing	70 out of 251 genes, 27.9%	227 out of 4922 background genes, 4.6%	8.18e-36	0	up-regulated	MAK16/YAL025C:RPS6B/YBR181C:KRR1/YCL059C:RPS14A/YCR031C:PWP2/YCR057C:NOP1/YDL014W:TSR1/YDL060W:RPS16B/YDL083C:RRP42/YDL111C:RPL35A/YDL191W:NHP2/YDL208W:SSB1/YDL229W:RPS11A/YDR025W:RPS13/YDR064W:RRP1/YDR087C:UTP5/YDR398W:RRP17/YDR412W:RPS18A/YDR450W:RPS24A/YER074W:RPS8B/YER102W:RPL30/YGL030W:RPL7A/YGL076C:NOP7/YGR103W:NSR1/YGR159C:RPS0A/YGR214W:ZUO1/YGR285C:RPS20/YHL015W:RPL8A/YHL033C:RPS27B/YHR02…
16072	rRNA metabolic process	70 out of 251 genes, 27.9%	243 out of 4922 background genes, 4.9%	1.24e-33	0	up-regulated	MAK16/YAL025C:RPS6B/YBR181C:KRR1/YCL059C:RPS14A/YCR031C:PWP2/YCR057C:NOP1/YDL014W:TSR1/YDL060W:RPS16B/YDL083C:RRP42/YDL111C:RPL35A/YDL191W:NHP2/YDL208W:SSB1/YDL229W:RPS11A/YDR025W:RPS13/YDR064W:RRP1/YDR087C:UTP5/YDR398W:RRP17/YDR412W:RPS18A/YDR450W:RPS24A/YER074W:RPS8B/YER102W:RPL30/YGL030W:RPL7A/YGL076C:NOP7/YGR103W:NSR1/YGR159C:RPS0A/YGR214W:ZUO1/YGR285C:RPS20/YHL015W:RPL8A/YHL033C:RPS27B/YHR02…
34660	ncRNA metabolic process	91 out of 251 genes, 36.3%	435 out of 4922 background genes, 8.8%	5.69e-33	0	WT levels	ATS1/YAL020C:MAK16/YAL025C:RPS6B/YBR181C:KRR1/YCL059C:RPS14A/YCR031C:PWP2/YCR057C:NOP1/YDL014W:SLM3/YDL033C:LHP1/YDL051W:TSR1/YDL060W:RPS16B/YDL083C:RRP42/YDL111C:TRM3/YDL112W:RPL35A/YDL191W:NHP2/YDL208W:SSB1/YDL229W:RPS11A/YDR025W:RPS13/YDR064W:RRP1/YDR087C:TRM1/YDR120C:RPA14/YDR156W:UTP5/YDR398W:RRP17/YDR412W:RPS18A/YDR450W:RPS24A/YER074W:RPS8B/YER102W:RPL30/YGL030W:RPL7A/YGL076C:MTO1/YGL236C:N…
34641	cellular nitrogen compound metabolic process	193 out of 251 genes, 76.9%	1956 out of 4922 background genes, 39.7%	5.38e-32	0	WT levels	ATS1/YAL020C:MAK16/YAL025C:RBG1/YAL036C:RPL19B/YBL027W:RPL23A/YBL087C:RPL32/YBL092W:RPL4A/YBR031W:HMT1/YBR034C:RPL19A/YBR084C-A:RPS6B/YBR181C:RPL21A/YBR191W:KRR1/YCL059C:RPS14A/YCR031C:PWP2/YCR057C:NOP1/YDL014W:SLM3/YDL033C:LHP1/YDL051W:TSR1/YDL060W:RPS29B/YDL061C:RPL31A/YDL075W:RPL13A/YDL082W:RPS16B/YDL083C:RRP42/YDL111C:TRM3/YDL112W:RPP1B/YDL130W:RPL35A/YDL191W:HEM3/YDL205C:NHP2/YDL208W:SSB1/YD…
6807	nitrogen compound metabolic process	198 out of 251 genes, 78.9%	2095 out of 4922 background genes, 42.6%	1.03e-30	0	WT levels	ATS1/YAL020C:MAK16/YAL025C:RBG1/YAL036C:RPL19B/YBL027W:RPL23A/YBL087C:RPL32/YBL092W:CDS1/YBR029C:RPL4A/YBR031W:HMT1/YBR034C:RPL19A/YBR084C-A:RPS6B/YBR181C:RPL21A/YBR191W:SHM1/YBR263W:KRR1/YCL059C:RPS14A/YCR031C:PWP2/YCR057C:NOP1/YDL014W:SLM3/YDL033C:LHP1/YDL051W:TSR1/YDL060W:RPS29B/YDL061C:RPL31A/YDL075W:RPL13A/YDL082W:RPS16B/YDL083C:RRP42/YDL111C:TRM3/YDL112W:RPP1B/YDL130W:RPL35A/YDL191W:HEM3/YD…
42273	ribosomal large subunit biogenesis	45 out of 251 genes, 17.9%	103 out of 4922 background genes, 2.1%	2.05e-29	0	up-regulated	MAK16/YAL025C:REI1/YBR267W:RSA4/YCR072C:RPL35A/YDL191W:RPL12A/YEL054C:MRH4/YGL064C:RPL7A/YGL076C:NSA1/YGL111W:RPL11B/YGR085C:NOP7/YGR103W:TIF4631/YGR162W:SDA1/YGR245C:RPL8A/YHL033C:SSF1/YHR066W:RPF1/YHR088W:SQT1/YIR012W:ALB1/YJL122W:RPL17B/YJL177W:MRT4/YKL009W:MAK11/YKL021C:RPL17A/YKL180W:RPF2/YKR081C:RPL40B/YKR094C:DRS1/YLL008W:RPL8B/YLL045C:RPL10/YLR075W:MDN1/YLR106C:RPL37A/YLR185W:DBP9/YLR276C…
6396	RNA processing	86 out of 251 genes, 34.3%	474 out of 4922 background genes, 9.6%	7.08e-26	0	WT levels	ATS1/YAL020C:MAK16/YAL025C:RPS6B/YBR181C:KRR1/YCL059C:RPS14A/YCR031C:PWP2/YCR057C:NOP1/YDL014W:SLM3/YDL033C:LHP1/YDL051W:TSR1/YDL060W:RPS16B/YDL083C:RRP42/YDL111C:TRM3/YDL112W:RPL35A/YDL191W:NHP2/YDL208W:SSB1/YDL229W:RPS11A/YDR025W:RPS13/YDR064W:RRP1/YDR087C:TRM1/YDR120C:UTP5/YDR398W:RRP17/YDR412W:RPS18A/YDR450W:CWC21/YDR482C:RPS24A/YER074W:RPS8B/YER102W:RPL30/YGL030W:RPL7A/YGL076C:MTO1/YGL236C:N…
42255	ribosome assembly	31 out of 251 genes, 12.4%	53 out of 4922 background genes, 1.1%	1.28e-24	0	WT levels	RPS14A/YCR031C:RSA4/YCR072C:RPS11A/YDR025W:RPL12A/YEL054C:MRH4/YGL064C:RPL11B/YGR085C:NSR1/YGR159C:RPS0A/YGR214W:RPS27B/YHR021C:SSF1/YHR066W:RPF1/YHR088W:SQT1/YIR012W:RPS14B/YJL191W:MRT4/YKL009W:MAK11/YKL021C:RPS27A/YKL156W:RPF2/YKR081C:RPL40B/YKR094C:DRS1/YLL008W:RPS0B/YLR048W:RPL10/YLR075W:MDN1/YLR106C:RPP0/YLR340W:RPL6B/YLR448W:RPL6A/YML073C:IPI3/YNL182C:RPL25/YOL127W:RPL3/YOR063W:RPL5/YPL131W…
42274	ribosomal small subunit biogenesis	40 out of 251 genes, 15.9%	124 out of 4922 background genes, 2.5%	6.91e-20	0	up-regulated	RPS6B/YBR181C:KRR1/YCL059C:RPS14A/YCR031C:PWP2/YCR057C:TSR1/YDL060W:RPS16B/YDL083C:NOP6/YDL213C:RPS11A/YDR025W:RPS13/YDR064W:UTP5/YDR398W:RPS18A/YDR450W:RPS24A/YER074W:RPS8B/YER102W:NOP7/YGR103W:NSR1/YGR159C:RPS0A/YGR214W:RPS20/YHL015W:RPS27B/YHR021C:RRP3/YHR065C:RPS24B/YIL069C:RPS14B/YJL191W:LTV1/YKL143W:RPS27A/YKL156W:RPS21A/YKR057W:RPS0B/YLR048W:EMG1/YLR186W:RPS18B/YML026C:UTP14/YML093W:HAS1/Y…
44271	cellular nitrogen compound biosynthetic process	131 out of 251 genes, 52.2%	1208 out of 4922 background genes, 24.5%	1.67e-19	0	WT levels	RBG1/YAL036C:RPL19B/YBL027W:RPL23A/YBL087C:RPL32/YBL092W:RPL4A/YBR031W:HMT1/YBR034C:RPL19A/YBR084C-A:RPS6B/YBR181C:RPL21A/YBR191W:RPS14A/YCR031C:RPS29B/YDL061C:RPL31A/YDL075W:RPL13A/YDL082W:RPS16B/YDL083C:RPP1B/YDL130W:RPL35A/YDL191W:HEM3/YDL205C:SSB1/YDL229W:RPL4B/YDR012W:RPS11A/YDR025W:RSM10/YDR041W:RPS13/YDR064W:RPA14/YDR156W:UTP5/YDR398W:RPS18A/YDR450W:RPL27B/YDR471W:RPL12A/YEL054C:RPL34A/YER…
44260	cellular macromolecule metabolic process	188 out of 251 genes, 74.9%	2252 out of 4922 background genes, 45.8%	3.02e-19	0	WT levels	ATS1/YAL020C:MAK16/YAL025C:RBG1/YAL036C:RPL19B/YBL027W:RPL23A/YBL087C:RPL32/YBL092W:RPL4A/YBR031W:HMT1/YBR034C:RPL19A/YBR084C-A:RPS6B/YBR181C:RPL21A/YBR191W:KRR1/YCL059C:RPS14A/YCR031C:PWP2/YCR057C:NOP1/YDL014W:SLM3/YDL033C:KNH1/YDL049C:LHP1/YDL051W:TSR1/YDL060W:RPS29B/YDL061C:RPL31A/YDL075W:RPL13A/YDL082W:RPS16B/YDL083C:RRP42/YDL111C:TRM3/YDL112W:RPP1B/YDL130W:RPL35A/YDL191W:NHP2/YDL208W:SSB1/YD…
44085	cellular component biogenesis	113 out of 251 genes, 45.0%	968 out of 4922 background genes, 19.7%	2.93e-18	0	WT levels	MAK16/YAL025C:RPS6B/YBR181C:REI1/YBR267W:KRR1/YCL059C:RPS14A/YCR031C:PWP2/YCR057C:RSA4/YCR072C:NOP1/YDL014W:TSR1/YDL060W:RPS16B/YDL083C:RRP42/YDL111C:RPL35A/YDL191W:NHP2/YDL208W:NOP6/YDL213C:SSB1/YDL229W:RPS11A/YDR025W:RPS13/YDR064W:RRP1/YDR087C:ARX1/YDR101C:UTP5/YDR398W:RRP17/YDR412W:RPS18A/YDR450W:RPL12A/YEL054C:ARB1/YER036C:RPL34A/YER056C-A:RPS24A/YER074W:RPS8B/YER102W:RPS26B/YER131W:RPL30/YGL…
462	maturation of SSU-rRNA from tricistronic rRNA transcript (SSU-rRNA, 5.8S rRNA, LSU-rRNA)	34 out of 251 genes, 13.5%	96 out of 4922 background genes, 2.0%	4.54e-18	0	WT levels	RPS6B/YBR181C:KRR1/YCL059C:RPS14A/YCR031C:PWP2/YCR057C:TSR1/YDL060W:RPS16B/YDL083C:RPS11A/YDR025W:RPS13/YDR064W:UTP5/YDR398W:RPS18A/YDR450W:RPS24A/YER074W:RPS8B/YER102W:NOP7/YGR103W:RPS0A/YGR214W:RPS20/YHL015W:RPS27B/YHR021C:RRP3/YHR065C:RPS24B/YIL069C:RPS14B/YJL191W:RPS27A/YKL156W:RPS21A/YKR057W:RPS0B/YLR048W:EMG1/YLR186W:RPS18B/YML026C:UTP14/YML093W:HAS1/YMR290C:RCL1/YOL010W:UTP23/YOR004W:PNO1/…
27	ribosomal large subunit assembly	22 out of 251 genes, 8.8%	35 out of 4922 background genes, 0.7%	6.58e-18	0	WT levels	RSA4/YCR072C:RPL12A/YEL054C:MRH4/YGL064C:RPL11B/YGR085C:SSF1/YHR066W:RPF1/YHR088W:SQT1/YIR012W:MRT4/YKL009W:MAK11/YKL021C:RPF2/YKR081C:RPL40B/YKR094C:DRS1/YLL008W:RPL10/YLR075W:MDN1/YLR106C:RPP0/YLR340W:RPL6B/YLR448W:RPL6A/YML073C:IPI3/YNL182C:RPL25/YOL127W:RPL3/YOR063W:RPL5/YPL131W:RPL11A/YPR102C
44267	cellular protein metabolic process	125 out of 251 genes, 49.8%	1175 out of 4922 background genes, 23.9%	2.36e-17	0	WT levels	RBG1/YAL036C:RPL19B/YBL027W:RPL23A/YBL087C:RPL32/YBL092W:RPL4A/YBR031W:HMT1/YBR034C:RPL19A/YBR084C-A:RPS6B/YBR181C:RPL21A/YBR191W:RPS14A/YCR031C:NOP1/YDL014W:RPS29B/YDL061C:RPL31A/YDL075W:RPL13A/YDL082W:RPS16B/YDL083C:RPP1B/YDL130W:RPL35A/YDL191W:SSB1/YDL229W:RPL4B/YDR012W:RPS11A/YDR025W:RSM10/YDR041W:RPS13/YDR064W:RPS18A/YDR450W:RMT2/YDR465C:RPL27B/YDR471W:RPL12A/YEL054C:RPL34A/YER056C-A:RPS24A/…
43170	macromolecule metabolic process	188 out of 251 genes, 74.9%	2324 out of 4922 background genes, 47.2%	2.59e-17	0	WT levels	ATS1/YAL020C:MAK16/YAL025C:RBG1/YAL036C:RPL19B/YBL027W:RPL23A/YBL087C:RPL32/YBL092W:RPL4A/YBR031W:HMT1/YBR034C:RPL19A/YBR084C-A:RPS6B/YBR181C:RPL21A/YBR191W:KRR1/YCL059C:RPS14A/YCR031C:PWP2/YCR057C:NOP1/YDL014W:SLM3/YDL033C:KNH1/YDL049C:LHP1/YDL051W:TSR1/YDL060W:RPS29B/YDL061C:RPL31A/YDL075W:RPL13A/YDL082W:RPS16B/YDL083C:RRP42/YDL111C:TRM3/YDL112W:RPP1B/YDL130W:RPL35A/YDL191W:NHP2/YDL208W:SSB1/YD…
34645	cellular macromolecule biosynthetic process	129 out of 251 genes, 51.4%	1257 out of 4922 background genes, 25.5%	9.65e-17	0	WT levels	RBG1/YAL036C:RPL19B/YBL027W:RPL23A/YBL087C:RPL32/YBL092W:RPL4A/YBR031W:HMT1/YBR034C:RPL19A/YBR084C-A:RPS6B/YBR181C:RPL21A/YBR191W:RPS14A/YCR031C:KNH1/YDL049C:RPS29B/YDL061C:RPL31A/YDL075W:RPL13A/YDL082W:RPS16B/YDL083C:RPP1B/YDL130W:RPL35A/YDL191W:SSB1/YDL229W:RPL4B/YDR012W:RPS11A/YDR025W:RSM10/YDR041W:RPS13/YDR064W:RPA14/YDR156W:UTP5/YDR398W:RPS18A/YDR450W:RPL27B/YDR471W:RPL12A/YEL054C:RPL34A/YER…
30490	maturation of SSU-rRNA	34 out of 251 genes, 13.5%	105 out of 4922 background genes, 2.1%	1.22e-16	0	WT levels	RPS6B/YBR181C:KRR1/YCL059C:RPS14A/YCR031C:PWP2/YCR057C:TSR1/YDL060W:RPS16B/YDL083C:RPS11A/YDR025W:RPS13/YDR064W:UTP5/YDR398W:RPS18A/YDR450W:RPS24A/YER074W:RPS8B/YER102W:NOP7/YGR103W:RPS0A/YGR214W:RPS20/YHL015W:RPS27B/YHR021C:RRP3/YHR065C:RPS24B/YIL069C:RPS14B/YJL191W:RPS27A/YKL156W:RPS21A/YKR057W:RPS0B/YLR048W:EMG1/YLR186W:RPS18B/YML026C:UTP14/YML093W:HAS1/YMR290C:RCL1/YOL010W:UTP23/YOR004W:PNO1/…
9059	macromolecule biosynthetic process	129 out of 251 genes, 51.4%	1264 out of 4922 background genes, 25.7%	1.62e-16	0	WT levels	RBG1/YAL036C:RPL19B/YBL027W:RPL23A/YBL087C:RPL32/YBL092W:RPL4A/YBR031W:HMT1/YBR034C:RPL19A/YBR084C-A:RPS6B/YBR181C:RPL21A/YBR191W:RPS14A/YCR031C:KNH1/YDL049C:RPS29B/YDL061C:RPL31A/YDL075W:RPL13A/YDL082W:RPS16B/YDL083C:RPP1B/YDL130W:RPL35A/YDL191W:SSB1/YDL229W:RPL4B/YDR012W:RPS11A/YDR025W:RSM10/YDR041W:RPS13/YDR064W:RPA14/YDR156W:UTP5/YDR398W:RPS18A/YDR450W:RPL27B/YDR471W:RPL12A/YEL054C:RPL34A/YER…
19538	protein metabolic process	125 out of 251 genes, 49.8%	1213 out of 4922 background genes, 24.6%	4.35e-16	0	WT levels	RBG1/YAL036C:RPL19B/YBL027W:RPL23A/YBL087C:RPL32/YBL092W:RPL4A/YBR031W:HMT1/YBR034C:RPL19A/YBR084C-A:RPS6B/YBR181C:RPL21A/YBR191W:RPS14A/YCR031C:NOP1/YDL014W:RPS29B/YDL061C:RPL31A/YDL075W:RPL13A/YDL082W:RPS16B/YDL083C:RPP1B/YDL130W:RPL35A/YDL191W:SSB1/YDL229W:RPL4B/YDR012W:RPS11A/YDR025W:RSM10/YDR041W:RPS13/YDR064W:RPS18A/YDR450W:RMT2/YDR465C:RPL27B/YDR471W:RPL12A/YEL054C:RPL34A/YER056C-A:RPS24A/…
22618	ribonucleoprotein complex assembly	36 out of 251 genes, 14.3%	136 out of 4922 background genes, 2.8%	1.66e-14	0	WT levels	RPS14A/YCR031C:RSA4/YCR072C:RPS11A/YDR025W:RPL12A/YEL054C:MRH4/YGL064C:RPL11B/YGR085C:NSR1/YGR159C:TIF4631/YGR162W:RPS0A/YGR214W:RPS27B/YHR021C:SSF1/YHR066W:RPF1/YHR088W:SQT1/YIR012W:RPS14B/YJL191W:MRT4/YKL009W:MAK11/YKL021C:RPS27A/YKL156W:RPF2/YKR081C:RPL40B/YKR094C:DRS1/YLL008W:RPS0B/YLR048W:RPL10/YLR075W:MDN1/YLR106C:RPP0/YLR340W:RPL6B/YLR448W:RPL6A/YML073C:NOP2/YNL061W:IPI3/YNL182C:RPL25/YOL1…
44238	primary metabolic process	203 out of 251 genes, 80.9%	2797 out of 4922 background genes, 56.8%	7.41e-14	0	WT levels	ATS1/YAL020C:MAK16/YAL025C:RBG1/YAL036C:RPL19B/YBL027W:RPL23A/YBL087C:RPL32/YBL092W:CDS1/YBR029C:RPL4A/YBR031W:HMT1/YBR034C:RPL19A/YBR084C-A:RPS6B/YBR181C:RPL21A/YBR191W:SHM1/YBR263W:KRR1/YCL059C:RPS14A/YCR031C:PWP2/YCR057C:NOP1/YDL014W:SLM3/YDL033C:KNH1/YDL049C:LHP1/YDL051W:TSR1/YDL060W:RPS29B/YDL061C:RPL31A/YDL075W:RPL13A/YDL082W:RPS16B/YDL083C:RRP42/YDL111C:TRM3/YDL112W:RPP1B/YDL130W:RPL35A/YD…
44237	cellular metabolic process	209 out of 251 genes, 83.3%	2940 out of 4922 background genes, 59.7%	8.06e-14	0	WT levels	ATS1/YAL020C:MAK16/YAL025C:RBG1/YAL036C:RPL19B/YBL027W:PRS4/YBL068W:RPL23A/YBL087C:RPL32/YBL092W:CDS1/YBR029C:RPL4A/YBR031W:HMT1/YBR034C:RPL19A/YBR084C-A:RPS6B/YBR181C:RPL21A/YBR191W:ARO4/YBR249C:SHM1/YBR263W:KRR1/YCL059C:RPS14A/YCR031C:PWP2/YCR057C:NOP1/YDL014W:SLM3/YDL033C:KNH1/YDL049C:LHP1/YDL051W:TSR1/YDL060W:RPS29B/YDL061C:RPL31A/YDL075W:RPL13A/YDL082W:RPS16B/YDL083C:RRP42/YDL111C:TRM3/YDL11…
9058	biosynthetic process	150 out of 251 genes, 59.8%	1722 out of 4922 background genes, 35.0%	1.01e-13	0	WT levels	RBG1/YAL036C:RPL19B/YBL027W:PRS4/YBL068W:RPL23A/YBL087C:RPL32/YBL092W:CDS1/YBR029C:RPL4A/YBR031W:HMT1/YBR034C:RPL19A/YBR084C-A:RPS6B/YBR181C:RPL21A/YBR191W:ARO4/YBR249C:SHM1/YBR263W:RPS14A/YCR031C:KNH1/YDL049C:RPS29B/YDL061C:RPL31A/YDL075W:RPL13A/YDL082W:RPS16B/YDL083C:RPP1B/YDL130W:RPL35A/YDL191W:HEM3/YDL205C:SSB1/YDL229W:RPL4B/YDR012W:RPS11A/YDR025W:RSM10/YDR041W:RPS13/YDR064W:RPA14/YDR156W:UTP…
71428	rRNA-containing ribonucleoprotein complex export from nucleus	24 out of 251 genes, 9.6%	60 out of 4922 background genes, 1.2%	1.22e-13	0	WT levels	SSB1/YDL229W:ARX1/YDR101C:RPS18A/YDR450W:ARB1/YER036C:RPS26B/YER131W:RPS2/YGL123W:RPS0A/YGR214W:SDA1/YGR245C:ZUO1/YGR285C:RPF1/YHR088W:RPS5/YJR123W:LTV1/YKL143W:RPL40B/YKR094C:RPS0B/YLR048W:RPS28B/YLR264W:RPS18B/YML026C:RPS10B/YMR230W:RPS19B/YNL302C:RPS15/YOL040C:RPS28A/YOR167C:RPS10A/YOR293W:RRS1/YOR294W:NOG1/YPL093W:YAR1/YPL239W
44249	cellular biosynthetic process	147 out of 251 genes, 58.6%	1674 out of 4922 background genes, 34.0%	1.47e-13	0	WT levels	RBG1/YAL036C:RPL19B/YBL027W:RPL23A/YBL087C:RPL32/YBL092W:CDS1/YBR029C:RPL4A/YBR031W:HMT1/YBR034C:RPL19A/YBR084C-A:RPS6B/YBR181C:RPL21A/YBR191W:ARO4/YBR249C:SHM1/YBR263W:RPS14A/YCR031C:KNH1/YDL049C:RPS29B/YDL061C:RPL31A/YDL075W:RPL13A/YDL082W:RPS16B/YDL083C:RPP1B/YDL130W:RPL35A/YDL191W:HEM3/YDL205C:SSB1/YDL229W:RPL4B/YDR012W:RPS11A/YDR025W:RSM10/YDR041W:RPS13/YDR064W:RPA14/YDR156W:UTP5/YDR398W:RPS…
1901576	organic substance biosynthetic process	148 out of 251 genes, 59.0%	1693 out of 4922 background genes, 34.4%	1.56e-13	0	WT levels	RBG1/YAL036C:RPL19B/YBL027W:PRS4/YBL068W:RPL23A/YBL087C:RPL32/YBL092W:CDS1/YBR029C:RPL4A/YBR031W:HMT1/YBR034C:RPL19A/YBR084C-A:RPS6B/YBR181C:RPL21A/YBR191W:ARO4/YBR249C:SHM1/YBR263W:RPS14A/YCR031C:KNH1/YDL049C:RPS29B/YDL061C:RPL31A/YDL075W:RPL13A/YDL082W:RPS16B/YDL083C:RPP1B/YDL130W:RPL35A/YDL191W:HEM3/YDL205C:SSB1/YDL229W:RPL4B/YDR012W:RPS11A/YDR025W:RSM10/YDR041W:RPS13/YDR064W:RPA14/YDR156W:UTP…
71826	ribonucleoprotein complex subunit organization	36 out of 251 genes, 14.3%	146 out of 4922 background genes, 3.0%	2.01e-13	0	WT levels	RPS14A/YCR031C:RSA4/YCR072C:RPS11A/YDR025W:RPL12A/YEL054C:MRH4/YGL064C:RPL11B/YGR085C:NSR1/YGR159C:TIF4631/YGR162W:RPS0A/YGR214W:RPS27B/YHR021C:SSF1/YHR066W:RPF1/YHR088W:SQT1/YIR012W:RPS14B/YJL191W:MRT4/YKL009W:MAK11/YKL021C:RPS27A/YKL156W:RPF2/YKR081C:RPL40B/YKR094C:DRS1/YLL008W:RPS0B/YLR048W:RPL10/YLR075W:MDN1/YLR106C:RPP0/YLR340W:RPL6B/YLR448W:RPL6A/YML073C:NOP2/YNL061W:IPI3/YNL182C:RPL25/YOL1…
71704	organic substance metabolic process	209 out of 251 genes, 83.3%	2967 out of 4922 background genes, 60.3%	3.29e-13	0	WT levels	ATS1/YAL020C:MAK16/YAL025C:RBG1/YAL036C:RPL19B/YBL027W:PRS4/YBL068W:RPL23A/YBL087C:RPL32/YBL092W:CDS1/YBR029C:RPL4A/YBR031W:HMT1/YBR034C:RPL19A/YBR084C-A:RPS6B/YBR181C:RPL21A/YBR191W:ARO4/YBR249C:SHM1/YBR263W:KRR1/YCL059C:RPS14A/YCR031C:PWP2/YCR057C:NOP1/YDL014W:SLM3/YDL033C:KNH1/YDL049C:LHP1/YDL051W:TSR1/YDL060W:RPS29B/YDL061C:RPL31A/YDL075W:RPL13A/YDL082W:RPS16B/YDL083C:RRP42/YDL111C:TRM3/YDL11…
70925	organelle assembly	32 out of 251 genes, 12.7%	123 out of 4922 background genes, 2.5%	1.93e-12	0	WT levels	RPS14A/YCR031C:RSA4/YCR072C:RPS11A/YDR025W:RPL12A/YEL054C:MRH4/YGL064C:RPL11B/YGR085C:NSR1/YGR159C:TIF4631/YGR162W:RPS0A/YGR214W:RPS27B/YHR021C:SSF1/YHR066W:RPF1/YHR088W:SQT1/YIR012W:RPS14B/YJL191W:MRT4/YKL009W:MAK11/YKL021C:RPS27A/YKL156W:RPF2/YKR081C:RPL40B/YKR094C:DRS1/YLL008W:RPS0B/YLR048W:RPL10/YLR075W:MDN1/YLR106C:RPP0/YLR340W:RPL6B/YLR448W:RPL6A/YML073C:IPI3/YNL182C:RPL25/YOL127W:RPL3/YOR0…
51029	rRNA transport	13 out of 251 genes, 5.2%	18 out of 4922 background genes, 0.4%	4.3e-11	0	WT levels	RPS18A/YDR450W:RPS26B/YER131W:RPS2/YGL123W:RPS0A/YGR214W:RPS5/YJR123W:RPS0B/YLR048W:RPS28B/YLR264W:RPS18B/YML026C:RPS10B/YMR230W:RPS19B/YNL302C:RPS15/YOL040C:RPS28A/YOR167C:RPS10A/YOR293W
6407	rRNA export from nucleus	13 out of 251 genes, 5.2%	18 out of 4922 background genes, 0.4%	4.3e-11	0	WT levels	RPS18A/YDR450W:RPS26B/YER131W:RPS2/YGL123W:RPS0A/YGR214W:RPS5/YJR123W:RPS0B/YLR048W:RPS28B/YLR264W:RPS18B/YML026C:RPS10B/YMR230W:RPS19B/YNL302C:RPS15/YOL040C:RPS28A/YOR167C:RPS10A/YOR293W
8152	metabolic process	209 out of 251 genes, 83.3%	3067 out of 4922 background genes, 62.3%	4.82e-11	0	WT levels	ATS1/YAL020C:MAK16/YAL025C:RBG1/YAL036C:RPL19B/YBL027W:PRS4/YBL068W:RPL23A/YBL087C:RPL32/YBL092W:CDS1/YBR029C:RPL4A/YBR031W:HMT1/YBR034C:RPL19A/YBR084C-A:RPS6B/YBR181C:RPL21A/YBR191W:ARO4/YBR249C:SHM1/YBR263W:KRR1/YCL059C:RPS14A/YCR031C:PWP2/YCR057C:NOP1/YDL014W:SLM3/YDL033C:KNH1/YDL049C:LHP1/YDL051W:TSR1/YDL060W:RPS29B/YDL061C:RPL31A/YDL075W:RPL13A/YDL082W:RPS16B/YDL083C:RRP42/YDL111C:TRM3/YDL11…
470	maturation of LSU-rRNA	18 out of 251 genes, 7.2%	46 out of 4922 background genes, 0.9%	1.26e-09	0	WT levels	MAK16/YAL025C:RPL35A/YDL191W:RPL7A/YGL076C:RPL8A/YHL033C:SSF1/YHR066W:RPF1/YHR088W:RPL17B/YJL177W:MAK11/YKL021C:RPL17A/YKL180W:RPF2/YKR081C:RPL8B/YLL045C:RPL37A/YLR185W:DBP9/YLR276C:HAS1/YMR290C:NOP2/YNL061W:DBP6/YNR038W:RPL7B/YPL198W:NIP7/YPL211W
460	maturation of 5.8S rRNA	23 out of 251 genes, 9.2%	81 out of 4922 background genes, 1.6%	2.53e-09	0	up-regulated	MAK16/YAL025C:KRR1/YCL059C:PWP2/YCR057C:RRP42/YDL111C:RPS18A/YDR450W:RPS0A/YGR214W:RRP4/YHR069C:RPF1/YHR088W:RPL17B/YJL177W:MAK11/YKL021C:RPL17A/YKL180W:RPS21A/YKR057W:RPF2/YKR081C:RPS0B/YLR048W:RPL37A/YLR185W:EMG1/YLR186W:RPS18B/YML026C:UTP14/YML093W:DBP6/YNR038W:RCL1/YOL010W:UTP23/YOR004W:PNO1/YOR145C:RRS1/YOR294W
466	maturation of 5.8S rRNA from tricistronic rRNA transcript (SSU-rRNA, 5.8S rRNA, LSU-rRNA)	23 out of 251 genes, 9.2%	81 out of 4922 background genes, 1.6%	2.53e-09	0	up-regulated	MAK16/YAL025C:KRR1/YCL059C:PWP2/YCR057C:RRP42/YDL111C:RPS18A/YDR450W:RPS0A/YGR214W:RRP4/YHR069C:RPF1/YHR088W:RPL17B/YJL177W:MAK11/YKL021C:RPL17A/YKL180W:RPS21A/YKR057W:RPF2/YKR081C:RPS0B/YLR048W:RPL37A/YLR185W:EMG1/YLR186W:RPS18B/YML026C:UTP14/YML093W:DBP6/YNR038W:RCL1/YOL010W:UTP23/YOR004W:PNO1/YOR145C:RRS1/YOR294W
469	cleavage involved in rRNA processing	21 out of 251 genes, 8.4%	72 out of 4922 background genes, 1.5%	1.27e-08	0	WT levels	KRR1/YCL059C:PWP2/YCR057C:TSR1/YDL060W:RRP42/YDL111C:NHP2/YDL208W:RPS18A/YDR450W:RPS0A/YGR214W:RPS27B/YHR021C:RRP4/YHR069C:RPL17B/YJL177W:RPL17A/YKL180W:RPS21A/YKR057W:RPS0B/YLR048W:RPL37A/YLR185W:EMG1/YLR186W:RPS18B/YML026C:UTP14/YML093W:RCL1/YOL010W:UTP23/YOR004W:PNO1/YOR145C:RRS1/YOR294W
478	endonucleolytic cleavage involved in rRNA processing	18 out of 251 genes, 7.2%	52 out of 4922 background genes, 1.1%	1.44e-08	0	WT levels	KRR1/YCL059C:PWP2/YCR057C:TSR1/YDL060W:RPS18A/YDR450W:RPS0A/YGR214W:RPS27B/YHR021C:RPL17B/YJL177W:RPL17A/YKL180W:RPS21A/YKR057W:RPS0B/YLR048W:RPL37A/YLR185W:EMG1/YLR186W:RPS18B/YML026C:UTP14/YML093W:RCL1/YOL010W:UTP23/YOR004W:PNO1/YOR145C:RRS1/YOR294W
479	endonucleolytic cleavage of tricistronic rRNA transcript (SSU-rRNA, 5.8S rRNA, LSU-rRNA)	18 out of 251 genes, 7.2%	52 out of 4922 background genes, 1.1%	1.44e-08	0	WT levels	KRR1/YCL059C:PWP2/YCR057C:TSR1/YDL060W:RPS18A/YDR450W:RPS0A/YGR214W:RPS27B/YHR021C:RPL17B/YJL177W:RPL17A/YKL180W:RPS21A/YKR057W:RPS0B/YLR048W:RPL37A/YLR185W:EMG1/YLR186W:RPS18B/YML026C:UTP14/YML093W:RCL1/YOL010W:UTP23/YOR004W:PNO1/YOR145C:RRS1/YOR294W
90502	RNA phosphodiester bond hydrolysis, endonucleolytic	18 out of 251 genes, 7.2%	53 out of 4922 background genes, 1.1%	2.09e-08	0	WT levels	KRR1/YCL059C:PWP2/YCR057C:TSR1/YDL060W:RPS18A/YDR450W:RPS0A/YGR214W:RPS27B/YHR021C:RPL17B/YJL177W:RPL17A/YKL180W:RPS21A/YKR057W:RPS0B/YLR048W:RPL37A/YLR185W:EMG1/YLR186W:RPS18B/YML026C:UTP14/YML093W:RCL1/YOL010W:UTP23/YOR004W:PNO1/YOR145C:RRS1/YOR294W
71426	ribonucleoprotein complex export from nucleus	25 out of 251 genes, 10.0%	117 out of 4922 background genes, 2.4%	2.51e-07	0	WT levels	HMT1/YBR034C:SSB1/YDL229W:ARX1/YDR101C:RPS18A/YDR450W:ARB1/YER036C:RPS26B/YER131W:RPS2/YGL123W:RPS0A/YGR214W:SDA1/YGR245C:ZUO1/YGR285C:RPF1/YHR088W:RPS5/YJR123W:LTV1/YKL143W:RPL40B/YKR094C:RPS0B/YLR048W:RPS28B/YLR264W:RPS18B/YML026C:RPS10B/YMR230W:RPS19B/YNL302C:RPS15/YOL040C:RPS28A/YOR167C:RPS10A/YOR293W:RRS1/YOR294W:NOG1/YPL093W:YAR1/YPL239W
71166	ribonucleoprotein complex localization	25 out of 251 genes, 10.0%	119 out of 4922 background genes, 2.4%	3.68e-07	0	WT levels	HMT1/YBR034C:SSB1/YDL229W:ARX1/YDR101C:RPS18A/YDR450W:ARB1/YER036C:RPS26B/YER131W:RPS2/YGL123W:RPS0A/YGR214W:SDA1/YGR245C:ZUO1/YGR285C:RPF1/YHR088W:RPS5/YJR123W:LTV1/YKL143W:RPL40B/YKR094C:RPS0B/YLR048W:RPS28B/YLR264W:RPS18B/YML026C:RPS10B/YMR230W:RPS19B/YNL302C:RPS15/YOL040C:RPS28A/YOR167C:RPS10A/YOR293W:RRS1/YOR294W:NOG1/YPL093W:YAR1/YPL239W
51168	nuclear export	25 out of 251 genes, 10.0%	123 out of 4922 background genes, 2.5%	7.71e-07	0	WT levels	HMT1/YBR034C:SSB1/YDL229W:ARX1/YDR101C:RPS18A/YDR450W:ARB1/YER036C:RPS26B/YER131W:RPS2/YGL123W:RPS0A/YGR214W:SDA1/YGR245C:ZUO1/YGR285C:RPF1/YHR088W:RPS5/YJR123W:LTV1/YKL143W:RPL40B/YKR094C:RPS0B/YLR048W:RPS28B/YLR264W:RPS18B/YML026C:RPS10B/YMR230W:RPS19B/YNL302C:RPS15/YOL040C:RPS28A/YOR167C:RPS10A/YOR293W:RRS1/YOR294W:NOG1/YPL093W:YAR1/YPL239W
90501	RNA phosphodiester bond hydrolysis	21 out of 251 genes, 8.4%	89 out of 4922 background genes, 1.8%	9.85e-07	0	WT levels	KRR1/YCL059C:PWP2/YCR057C:TSR1/YDL060W:RRP42/YDL111C:NHP2/YDL208W:RPS18A/YDR450W:RPS0A/YGR214W:RPS27B/YHR021C:RRP4/YHR069C:RPL17B/YJL177W:RPL17A/YKL180W:RPS21A/YKR057W:RPS0B/YLR048W:RPL37A/YLR185W:EMG1/YLR186W:RPS18B/YML026C:UTP14/YML093W:RCL1/YOL010W:UTP23/YOR004W:PNO1/YOR145C:RRS1/YOR294W
463	maturation of LSU-rRNA from tricistronic rRNA transcript (SSU-rRNA, 5.8S rRNA, LSU-rRNA)	14 out of 251 genes, 5.6%	39 out of 4922 background genes, 0.8%	1.45e-06	0	WT levels	MAK16/YAL025C:RPL35A/YDL191W:SSF1/YHR066W:RPF1/YHR088W:RPL17B/YJL177W:MAK11/YKL021C:RPL17A/YKL180W:RPF2/YKR081C:RPL37A/YLR185W:DBP9/YLR276C:HAS1/YMR290C:NOP2/YNL061W:DBP6/YNR038W:NIP7/YPL211W
6913	nucleocytoplasmic transport	29 out of 251 genes, 11.6%	172 out of 4922 background genes, 3.5%	3.46e-06	0	WT levels	HMT1/YBR034C:REI1/YBR267W:SSB1/YDL229W:ARX1/YDR101C:RPS18A/YDR450W:ARB1/YER036C:KAP123/YER110C:RPS26B/YER131W:RPS2/YGL123W:RPS0A/YGR214W:SDA1/YGR245C:ZUO1/YGR285C:RPF1/YHR088W:NPA3/YJR072C:RPS5/YJR123W:LTV1/YKL143W:SRP40/YKR092C:RPL40B/YKR094C:RPS0B/YLR048W:RPS28B/YLR264W:RPS18B/YML026C:RPS10B/YMR230W:RPS19B/YNL302C:RPS15/YOL040C:RPS28A/YOR167C:RPS10A/YOR293W:RRS1/YOR294W:NOG1/YPL093W:YAR1/YPL239W
51169	nuclear transport	29 out of 251 genes, 11.6%	173 out of 4922 background genes, 3.5%	3.98e-06	0	WT levels	HMT1/YBR034C:REI1/YBR267W:SSB1/YDL229W:ARX1/YDR101C:RPS18A/YDR450W:ARB1/YER036C:KAP123/YER110C:RPS26B/YER131W:RPS2/YGL123W:RPS0A/YGR214W:SDA1/YGR245C:ZUO1/YGR285C:RPF1/YHR088W:NPA3/YJR072C:RPS5/YJR123W:LTV1/YKL143W:SRP40/YKR092C:RPL40B/YKR094C:RPS0B/YLR048W:RPS28B/YLR264W:RPS18B/YML026C:RPS10B/YMR230W:RPS19B/YNL302C:RPS15/YOL040C:RPS28A/YOR167C:RPS10A/YOR293W:RRS1/YOR294W:NOG1/YPL093W:YAR1/YPL239W
16070	RNA metabolic process	99 out of 251 genes, 39.4%	1167 out of 4922 background genes, 23.7%	4.74e-06	0	WT levels	ATS1/YAL020C:MAK16/YAL025C:HMT1/YBR034C:RPS6B/YBR181C:KRR1/YCL059C:RPS14A/YCR031C:PWP2/YCR057C:NOP1/YDL014W:SLM3/YDL033C:LHP1/YDL051W:TSR1/YDL060W:RPS16B/YDL083C:RRP42/YDL111C:TRM3/YDL112W:RPL35A/YDL191W:NHP2/YDL208W:SSB1/YDL229W:RPS11A/YDR025W:RPS13/YDR064W:RRP1/YDR087C:TRM1/YDR120C:RPA14/YDR156W:UTP5/YDR398W:RRP17/YDR412W:RPS18A/YDR450W:CWC21/YDR482C:RPS24A/YER074W:RPS8B/YER102W:RPL30/YGL030W:M…
9451	RNA modification	21 out of 251 genes, 8.4%	97 out of 4922 background genes, 2.0%	5.22e-06	0	WT levels	ATS1/YAL020C:NOP1/YDL014W:SLM3/YDL033C:TRM3/YDL112W:NHP2/YDL208W:TRM1/YDR120C:MTO1/YGL236C:ELP2/YGR200C:GAR1/YHR089C:KAE1/YKR038C:EMG1/YLR186W:DUS3/YLR401C:TRM9/YML014W:DUS1/YML080W:NOP2/YNL061W:SMM1/YNR015W:TRM10/YOL093W:TRM11/YOL124C:TRM13/YOL125W:MRM1/YOR201C:DIM1/YPL266W
90305	nucleic acid phosphodiester bond hydrolysis	22 out of 251 genes, 8.8%	114 out of 4922 background genes, 2.3%	2.14e-05	0	WT levels	KRR1/YCL059C:PWP2/YCR057C:TSR1/YDL060W:RRP42/YDL111C:NHP2/YDL208W:RPS18A/YDR450W:RPS0A/YGR214W:RPS27B/YHR021C:RRP4/YHR069C:RPL17B/YJL177W:NUC1/YJL208C:RPL17A/YKL180W:RPS21A/YKR057W:RPS0B/YLR048W:RPL37A/YLR185W:EMG1/YLR186W:RPS18B/YML026C:UTP14/YML093W:RCL1/YOL010W:UTP23/YOR004W:PNO1/YOR145C:RRS1/YOR294W
447	endonucleolytic cleavage in ITS1 to separate SSU-rRNA from 5.8S rRNA and LSU-rRNA from tricistronic rRNA transcript (SSU-rRNA, 5.8S rRNA, LSU-rRNA)	13 out of 251 genes, 5.2%	42 out of 4922 background genes, 0.9%	4.24e-05	0	WT levels	KRR1/YCL059C:PWP2/YCR057C:RPS18A/YDR450W:RPS0A/YGR214W:RPS21A/YKR057W:RPS0B/YLR048W:EMG1/YLR186W:RPS18B/YML026C:UTP14/YML093W:RCL1/YOL010W:UTP23/YOR004W:PNO1/YOR145C:RRS1/YOR294W
28	ribosomal small subunit assembly	8 out of 251 genes, 3.2%	14 out of 4922 background genes, 0.3%	5.09e-05	0	WT levels	RPS14A/YCR031C:RPS11A/YDR025W:NSR1/YGR159C:RPS0A/YGR214W:RPS27B/YHR021C:RPS14B/YJL191W:RPS27A/YKL156W:RPS0B/YLR048W
6450	regulation of translational fidelity	7 out of 251 genes, 2.8%	15 out of 4922 background genes, 0.3%	0.00202	0	WT levels	RPL31A/YDL075W:SSB1/YDL229W:RPS2/YGL123W:ZUO1/YGR285C:SSZ1/YHR064C:RPS5/YJR123W:RPL31B/YLR406C
461	endonucleolytic cleavage to generate mature 3'-end of SSU-rRNA from (SSU-rRNA, 5.8S rRNA, LSU-rRNA)	4 out of 251 genes, 1.6%	4 out of 4922 background genes, 0.1%	0.00358	0	WT levels	TSR1/YDL060W:RPS0A/YGR214W:RPS21A/YKR057W:RPS0B/YLR048W
90304	nucleic acid metabolic process	101 out of 251 genes, 40.2%	1367 out of 4922 background genes, 27.8%	0.00439	0	WT levels	ATS1/YAL020C:MAK16/YAL025C:HMT1/YBR034C:RPS6B/YBR181C:KRR1/YCL059C:RPS14A/YCR031C:PWP2/YCR057C:NOP1/YDL014W:SLM3/YDL033C:LHP1/YDL051W:TSR1/YDL060W:RPS16B/YDL083C:RRP42/YDL111C:TRM3/YDL112W:RPL35A/YDL191W:NHP2/YDL208W:SSB1/YDL229W:RPS11A/YDR025W:RPS13/YDR064W:RRP1/YDR087C:TRM1/YDR120C:RPA14/YDR156W:UTP5/YDR398W:RRP17/YDR412W:RPS18A/YDR450W:CWC21/YDR482C:RPS24A/YER074W:RPS8B/YER102W:RPL30/YGL030W:M…
33753	establishment of ribosome localization	11 out of 251 genes, 4.4%	45 out of 4922 background genes, 0.9%	0.0057	0	WT levels	SSB1/YDL229W:ARX1/YDR101C:ARB1/YER036C:SDA1/YGR245C:ZUO1/YGR285C:RPF1/YHR088W:LTV1/YKL143W:RPL40B/YKR094C:RRS1/YOR294W:NOG1/YPL093W:YAR1/YPL239W
54	ribosomal subunit export from nucleus	11 out of 251 genes, 4.4%	45 out of 4922 background genes, 0.9%	0.0057	0	WT levels	SSB1/YDL229W:ARX1/YDR101C:ARB1/YER036C:SDA1/YGR245C:ZUO1/YGR285C:RPF1/YHR088W:LTV1/YKL143W:RPL40B/YKR094C:RRS1/YOR294W:NOG1/YPL093W:YAR1/YPL239W
33750	ribosome localization	11 out of 251 genes, 4.4%	46 out of 4922 background genes, 0.9%	0.00716	0	WT levels	SSB1/YDL229W:ARX1/YDR101C:ARB1/YER036C:SDA1/YGR245C:ZUO1/YGR285C:RPF1/YHR088W:LTV1/YKL143W:RPL40B/YKR094C:RRS1/YOR294W:NOG1/YPL093W:YAR1/YPL239W
6400	tRNA modification	14 out of 251 genes, 5.6%	73 out of 4922 background genes, 1.5%	0.00749	0	WT levels	ATS1/YAL020C:SLM3/YDL033C:TRM3/YDL112W:TRM1/YDR120C:MTO1/YGL236C:ELP2/YGR200C:KAE1/YKR038C:DUS3/YLR401C:TRM9/YML014W:DUS1/YML080W:SMM1/YNR015W:TRM10/YOL093W:TRM11/YOL124C:TRM13/YOL125W
Function
GOID	GO_term	Cluster frequency	Background frequency	p-value	FDR	Status at TGA	Gene(s) annotated to the term
3735	structural constituent of ribosome	99 out of 251 genes, 39.4%	204 out of 4922 background genes, 4.1%	2.75e-77	0	down-regulated	RPL19B/YBL027W:RPL23A/YBL087C:RPL32/YBL092W:RPL4A/YBR031W:RPL19A/YBR084C-A:RPS6B/YBR181C:RPL21A/YBR191W:RPS14A/YCR031C:RPS29B/YDL061C:RPL31A/YDL075W:RPL13A/YDL082W:RPS16B/YDL083C:RPP1B/YDL130W:RPL35A/YDL191W:RPL4B/YDR012W:RPS11A/YDR025W:RSM10/YDR041W:RPS13/YDR064W:RPS18A/YDR450W:RPL27B/YDR471W:RPL12A/YEL054C:RPL34A/YER056C-A:RPS24A/YER074W:RPS8B/YER102W:RPL23B/YER117W:RPS26B/YER131W:RPL22B/YFL034…
5198	structural molecule activity	99 out of 251 genes, 39.4%	304 out of 4922 background genes, 6.2%	8.03e-57	0	down-regulated	RPL19B/YBL027W:RPL23A/YBL087C:RPL32/YBL092W:RPL4A/YBR031W:RPL19A/YBR084C-A:RPS6B/YBR181C:RPL21A/YBR191W:RPS14A/YCR031C:RPS29B/YDL061C:RPL31A/YDL075W:RPL13A/YDL082W:RPS16B/YDL083C:RPP1B/YDL130W:RPL35A/YDL191W:RPL4B/YDR012W:RPS11A/YDR025W:RSM10/YDR041W:RPS13/YDR064W:RPS18A/YDR450W:RPL27B/YDR471W:RPL12A/YEL054C:RPL34A/YER056C-A:RPS24A/YER074W:RPS8B/YER102W:RPL23B/YER117W:RPS26B/YER131W:RPL22B/YFL034…
3723	RNA binding	49 out of 251 genes, 19.5%	357 out of 4922 background genes, 7.3%	5.78e-09	0	WT levels	RPS14A/YCR031C:PWP2/YCR057C:LHP1/YDL051W:NHP2/YDL208W:NOP6/YDL213C:RPS13/YDR064W:RPL30/YGL030W:MRH4/YGL064C:RPS2/YGL123W:RPL26B/YGR034W:NOP7/YGR103W:RPL24B/YGR148C:NSR1/YGR159C:TIF4631/YGR162W:RPL14B/YHL001W:RPS20/YHL015W:SSF1/YHR066W:RPF1/YHR088W:GAR1/YHR089C:RPL16A/YIL133C:RPS14B/YJL191W:RPL14A/YKL006W:MRT4/YKL009W:EBP2/YKL172W:RPF2/YKR081C:MEU1/YLR017W:RPL15A/YLR029C:YEF3/YLR249W:DBP9/YLR276C:…
19843	rRNA binding	13 out of 251 genes, 5.2%	30 out of 4922 background genes, 0.6%	7.73e-08	0	WT levels	NOP6/YDL213C:RPS13/YDR064W:MRH4/YGL064C:RPS2/YGL123W:SSF1/YHR066W:RPF1/YHR088W:RPS14B/YJL191W:MRT4/YKL009W:RPF2/YKR081C:RPP0/YLR340W:UTP23/YOR004W:RPS9A/YPL081W:RPL5/YPL131W
8173	RNA methyltransferase activity	11 out of 251 genes, 4.4%	35 out of 4922 background genes, 0.7%	8.27e-05	0	WT levels	NOP1/YDL014W:TRM3/YDL112W:TRM1/YDR120C:EMG1/YLR186W:TRM9/YML014W:NOP2/YNL061W:TRM10/YOL093W:TRM11/YOL124C:TRM13/YOL125W:MRM1/YOR201C:DIM1/YPL266W
16741	transferase activity, transferring one-carbon groups	16 out of 251 genes, 6.4%	96 out of 4922 background genes, 2.0%	0.00263	0	WT levels	HMT1/YBR034C:SHM1/YBR263W:NOP1/YDL014W:TRM3/YDL112W:TRM1/YDR120C:RMT2/YDR465C:EFM1/YHL039W:EFM4/YIL064W:EMG1/YLR186W:TRM9/YML014W:NOP2/YNL061W:TRM10/YOL093W:TRM11/YOL124C:TRM13/YOL125W:MRM1/YOR201C:DIM1/YPL266W
8168	methyltransferase activity	15 out of 251 genes, 6.0%	87 out of 4922 background genes, 1.8%	0.00315	0	WT levels	HMT1/YBR034C:NOP1/YDL014W:TRM3/YDL112W:TRM1/YDR120C:RMT2/YDR465C:EFM1/YHL039W:EFM4/YIL064W:EMG1/YLR186W:TRM9/YML014W:NOP2/YNL061W:TRM10/YOL093W:TRM11/YOL124C:TRM13/YOL125W:MRM1/YOR201C:DIM1/YPL266W
70181	small ribosomal subunit rRNA binding	4 out of 251 genes, 1.6%	5 out of 4922 background genes, 0.1%	0.00384	0	WT levels	RPS13/YDR064W:RPS2/YGL123W:RPS14B/YJL191W:UTP23/YOR004W
8170	N-methyltransferase activity	9 out of 251 genes, 3.6%	36 out of 4922 background genes, 0.7%	0.00684	0	WT levels	HMT1/YBR034C:NOP1/YDL014W:TRM1/YDR120C:RMT2/YDR465C:EFM1/YHL039W:EFM4/YIL064W:TRM11/YOL124C:MRM1/YOR201C:DIM1/YPL266W
8757	S-adenosylmethionine-dependent methyltransferase activity	13 out of 251 genes, 5.2%	73 out of 4922 background genes, 1.5%	0.00774	0	WT levels	HMT1/YBR034C:NOP1/YDL014W:TRM3/YDL112W:TRM1/YDR120C:RMT2/YDR465C:EFM1/YHL039W:EFM4/YIL064W:EMG1/YLR186W:NOP2/YNL061W:TRM10/YOL093W:TRM11/YOL124C:MRM1/YOR201C:DIM1/YPL266W
Component
GOID	GO_term	Cluster frequency	Background frequency	p-value	FDR	Status at TGA	Gene(s) annotated to the term
22626	cytosolic ribosome	101 out of 251 genes, 40.2%	156 out of 4922 background genes, 3.2%	5.91e-97	0	WT levels	RPL19B/YBL027W:RPL23A/YBL087C:RPL32/YBL092W:RPL4A/YBR031W:RPL19A/YBR084C-A:RPS6B/YBR181C:RPL21A/YBR191W:REI1/YBR267W:RPS14A/YCR031C:RPS29B/YDL061C:RPL31A/YDL075W:RPL13A/YDL082W:RPS16B/YDL083C:RPP1B/YDL130W:RPL35A/YDL191W:RPL4B/YDR012W:RPS11A/YDR025W:RPS13/YDR064W:ARX1/YDR101C:RPS18A/YDR450W:RPL27B/YDR471W:RPL12A/YEL054C:RPS24A/YER074W:RPS8B/YER102W:RPL23B/YER117W:RPS26B/YER131W:RPL22B/YFL034C-A:R…
1990904	ribonucleoprotein complex	156 out of 251 genes, 62.2%	632 out of 4922 background genes, 12.8%	4.23e-79	0	WT levels	MAK16/YAL025C:RBG1/YAL036C:RPL19B/YBL027W:RPL23A/YBL087C:RPL32/YBL092W:RPL4A/YBR031W:RPL19A/YBR084C-A:RPS6B/YBR181C:RPL21A/YBR191W:REI1/YBR267W:KRR1/YCL059C:RPS14A/YCR031C:PWP2/YCR057C:RSA4/YCR072C:NOP1/YDL014W:TSR1/YDL060W:RPS29B/YDL061C:RPL31A/YDL075W:RPL13A/YDL082W:RPS16B/YDL083C:RPP1B/YDL130W:RPL35A/YDL191W:NHP2/YDL208W:NOP6/YDL213C:SSB1/YDL229W:RPL4B/YDR012W:RPS11A/YDR025W:RSM10/YDR041W:RPS1…
30529	intracellular ribonucleoprotein complex	156 out of 251 genes, 62.2%	632 out of 4922 background genes, 12.8%	4.23e-79	0	WT levels	MAK16/YAL025C:RBG1/YAL036C:RPL19B/YBL027W:RPL23A/YBL087C:RPL32/YBL092W:RPL4A/YBR031W:RPL19A/YBR084C-A:RPS6B/YBR181C:RPL21A/YBR191W:REI1/YBR267W:KRR1/YCL059C:RPS14A/YCR031C:PWP2/YCR057C:RSA4/YCR072C:NOP1/YDL014W:TSR1/YDL060W:RPS29B/YDL061C:RPL31A/YDL075W:RPL13A/YDL082W:RPS16B/YDL083C:RPP1B/YDL130W:RPL35A/YDL191W:NHP2/YDL208W:NOP6/YDL213C:SSB1/YDL229W:RPL4B/YDR012W:RPS11A/YDR025W:RSM10/YDR041W:RPS1…
44391	ribosomal subunit	103 out of 251 genes, 41.0%	222 out of 4922 background genes, 4.5%	2.52e-78	0	down-regulated	RPL19B/YBL027W:RPL23A/YBL087C:RPL32/YBL092W:RPL4A/YBR031W:RPL19A/YBR084C-A:RPS6B/YBR181C:RPL21A/YBR191W:REI1/YBR267W:RPS14A/YCR031C:RPS29B/YDL061C:RPL31A/YDL075W:RPL13A/YDL082W:RPS16B/YDL083C:RPP1B/YDL130W:RPL35A/YDL191W:RPL4B/YDR012W:RPS11A/YDR025W:RSM10/YDR041W:RPS13/YDR064W:ARX1/YDR101C:RPS18A/YDR450W:RPL27B/YDR471W:RPL12A/YEL054C:RPS24A/YER074W:RPS8B/YER102W:RPL23B/YER117W:RPS26B/YER131W:RPL2…
44445	cytosolic part	101 out of 251 genes, 40.2%	218 out of 4922 background genes, 4.4%	1.66e-76	0	WT levels	RPL19B/YBL027W:RPL23A/YBL087C:RPL32/YBL092W:RPL4A/YBR031W:RPL19A/YBR084C-A:RPS6B/YBR181C:RPL21A/YBR191W:REI1/YBR267W:RPS14A/YCR031C:RPS29B/YDL061C:RPL31A/YDL075W:RPL13A/YDL082W:RPS16B/YDL083C:RPP1B/YDL130W:RPL35A/YDL191W:RPL4B/YDR012W:RPS11A/YDR025W:RPS13/YDR064W:ARX1/YDR101C:RPS18A/YDR450W:RPL27B/YDR471W:RPL12A/YEL054C:RPS24A/YER074W:RPS8B/YER102W:RPL23B/YER117W:RPS26B/YER131W:RPL22B/YFL034C-A:R…
5840	ribosome	114 out of 251 genes, 45.4%	318 out of 4922 background genes, 6.5%	1.27e-72	0	down-regulated	RBG1/YAL036C:RPL19B/YBL027W:RPL23A/YBL087C:RPL32/YBL092W:RPL4A/YBR031W:RPL19A/YBR084C-A:RPS6B/YBR181C:RPL21A/YBR191W:REI1/YBR267W:RPS14A/YCR031C:RSA4/YCR072C:NOP1/YDL014W:RPS29B/YDL061C:RPL31A/YDL075W:RPL13A/YDL082W:RPS16B/YDL083C:RPP1B/YDL130W:RPL35A/YDL191W:RPL4B/YDR012W:RPS11A/YDR025W:RSM10/YDR041W:RPS13/YDR064W:ARX1/YDR101C:RPS18A/YDR450W:RPL27B/YDR471W:RPL12A/YEL054C:ARB1/YER036C:RPS24A/YER0…
22625	cytosolic large ribosomal subunit	62 out of 251 genes, 24.7%	83 out of 4922 background genes, 1.7%	3.33e-63	0	WT levels	RPL19B/YBL027W:RPL23A/YBL087C:RPL32/YBL092W:RPL4A/YBR031W:RPL19A/YBR084C-A:RPL21A/YBR191W:REI1/YBR267W:RPL31A/YDL075W:RPL13A/YDL082W:RPP1B/YDL130W:RPL35A/YDL191W:RPL4B/YDR012W:ARX1/YDR101C:RPL27B/YDR471W:RPL12A/YEL054C:RPL23B/YER117W:RPL22B/YFL034C-A:RPL2A/YFR031C-A:RPL30/YGL030W:RPL7A/YGL076C:RPL1B/YGL135W:RPL9A/YGL147C:RPL26B/YGR034W:RPL11B/YGR085C:RPL24B/YGR148C:RPL14B/YHL001W:RPL8A/YHL033C:RP…
15934	large ribosomal subunit	64 out of 251 genes, 25.5%	130 out of 4922 background genes, 2.6%	3.34e-48	0	down-regulated	RPL19B/YBL027W:RPL23A/YBL087C:RPL32/YBL092W:RPL4A/YBR031W:RPL19A/YBR084C-A:RPL21A/YBR191W:REI1/YBR267W:RPL31A/YDL075W:RPL13A/YDL082W:RPP1B/YDL130W:RPL35A/YDL191W:RPL4B/YDR012W:ARX1/YDR101C:RPL27B/YDR471W:RPL12A/YEL054C:RPL23B/YER117W:RPL22B/YFL034C-A:RPL2A/YFR031C-A:RPL30/YGL030W:MRH4/YGL064C:RPL7A/YGL076C:RPL1B/YGL135W:RPL9A/YGL147C:RPL26B/YGR034W:RPL11B/YGR085C:RPL24B/YGR148C:RPL14B/YHL001W:RPL…
43228	non-membrane-bounded organelle	162 out of 251 genes, 64.5%	1140 out of 4922 background genes, 23.2%	5.66e-45	0	WT levels	MAK16/YAL025C:RBG1/YAL036C:RPL19B/YBL027W:RPL23A/YBL087C:RPL32/YBL092W:RPL4A/YBR031W:RPL19A/YBR084C-A:RPS6B/YBR181C:RPL21A/YBR191W:REI1/YBR267W:KRR1/YCL059C:RPS14A/YCR031C:PWP2/YCR057C:RSA4/YCR072C:YCR087C-A:NOP1/YDL014W:LHP1/YDL051W:TSR1/YDL060W:RPS29B/YDL061C:RPL31A/YDL075W:RPL13A/YDL082W:RPS16B/YDL083C:RPP1B/YDL130W:RPL35A/YDL191W:NHP2/YDL208W:NOP6/YDL213C:RPL4B/YDR012W:RPS11A/YDR025W:RSM10/YD…
43232	intracellular non-membrane-bounded organelle	162 out of 251 genes, 64.5%	1140 out of 4922 background genes, 23.2%	5.66e-45	0	WT levels	MAK16/YAL025C:RBG1/YAL036C:RPL19B/YBL027W:RPL23A/YBL087C:RPL32/YBL092W:RPL4A/YBR031W:RPL19A/YBR084C-A:RPS6B/YBR181C:RPL21A/YBR191W:REI1/YBR267W:KRR1/YCL059C:RPS14A/YCR031C:PWP2/YCR057C:RSA4/YCR072C:YCR087C-A:NOP1/YDL014W:LHP1/YDL051W:TSR1/YDL060W:RPS29B/YDL061C:RPL31A/YDL075W:RPL13A/YDL082W:RPS16B/YDL083C:RPP1B/YDL130W:RPL35A/YDL191W:NHP2/YDL208W:NOP6/YDL213C:RPL4B/YDR012W:RPS11A/YDR025W:RSM10/YD…
30684	preribosome	66 out of 251 genes, 26.3%	176 out of 4922 background genes, 3.6%	2.23e-40	0	up-regulated	MAK16/YAL025C:RPL19B/YBL027W:RPS6B/YBR181C:REI1/YBR267W:KRR1/YCL059C:RPS14A/YCR031C:PWP2/YCR057C:NOP1/YDL014W:TSR1/YDL060W:RPL35A/YDL191W:NOP6/YDL213C:RPS11A/YDR025W:RPS13/YDR064W:RRP1/YDR087C:ARX1/YDR101C:UTP5/YDR398W:RPL27B/YDR471W:ARB1/YER036C:RPL34A/YER056C-A:RPS8B/YER102W:RPL2A/YFR031C-A:RPL7A/YGL076C:NSA1/YGL111W:RPS2/YGL123W:RPL1B/YGL135W:NOP7/YGR103W:RPS0A/YGR214W:RPL14B/YHL001W:SSF1/YHR0…
22627	cytosolic small ribosomal subunit	37 out of 251 genes, 14.7%	59 out of 4922 background genes, 1.2%	3.92e-32	0	WT levels	RPS6B/YBR181C:RPS14A/YCR031C:RPS29B/YDL061C:RPS16B/YDL083C:RPS11A/YDR025W:RPS13/YDR064W:RPS18A/YDR450W:RPS24A/YER074W:RPS8B/YER102W:RPS26B/YER131W:RPS2/YGL123W:RPS0A/YGR214W:RPS20/YHL015W:RPS27B/YHR021C:RPS4B/YHR203C:RPS24B/YIL069C:RPS22A/YJL190C:RPS14B/YJL191W:RPS5/YJR123W:RPS4A/YJR145C:RPS27A/YKL156W:RPS21A/YKR057W:RPS0B/YLR048W:RPS28B/YLR264W:RPS25B/YLR333C:RPS18B/YML026C:RPS10B/YMR230W:RPS7B/…
5829	cytosol	107 out of 251 genes, 42.6%	667 out of 4922 background genes, 13.6%	1.14e-29	0	WT levels	RPL19B/YBL027W:RPL23A/YBL087C:RPL32/YBL092W:RPL4A/YBR031W:RPL19A/YBR084C-A:RPS6B/YBR181C:RPL21A/YBR191W:REI1/YBR267W:RPS14A/YCR031C:RPS29B/YDL061C:RPL31A/YDL075W:RPL13A/YDL082W:RPS16B/YDL083C:RPP1B/YDL130W:RPL35A/YDL191W:RPL4B/YDR012W:RPS11A/YDR025W:RPS13/YDR064W:ARX1/YDR101C:RPS18A/YDR450W:RPL27B/YDR471W:RPL12A/YEL054C:RPS24A/YER074W:RPS8B/YER102W:RPL23B/YER117W:RPS26B/YER131W:RPL22B/YFL034C-A:R…
15935	small ribosomal subunit	39 out of 251 genes, 15.5%	92 out of 4922 background genes, 1.9%	3.11e-25	0	WT levels	RPS6B/YBR181C:RPS14A/YCR031C:RPS29B/YDL061C:RPS16B/YDL083C:RPS11A/YDR025W:RSM10/YDR041W:RPS13/YDR064W:RPS18A/YDR450W:RPS24A/YER074W:RPS8B/YER102W:RPS26B/YER131W:RPS2/YGL123W:MRP13/YGR084C:RPS0A/YGR214W:RPS20/YHL015W:RPS27B/YHR021C:RPS4B/YHR203C:RPS24B/YIL069C:RPS22A/YJL190C:RPS14B/YJL191W:RPS5/YJR123W:RPS4A/YJR145C:RPS27A/YKL156W:RPS21A/YKR057W:RPS0B/YLR048W:RPS28B/YLR264W:RPS25B/YLR333C:RPS18B/Y…
30687	preribosome, large subunit precursor	37 out of 251 genes, 14.7%	85 out of 4922 background genes, 1.7%	2.3e-24	0	up-regulated	MAK16/YAL025C:RPL19B/YBL027W:REI1/YBR267W:RPL35A/YDL191W:NOP6/YDL213C:RRP1/YDR087C:ARX1/YDR101C:RPL27B/YDR471W:ARB1/YER036C:RPL34A/YER056C-A:RPL2A/YFR031C-A:RPL7A/YGL076C:NSA1/YGL111W:RPL1B/YGL135W:NOP7/YGR103W:RPL14B/YHL001W:SSF1/YHR066W:RPF1/YHR088W:SQT1/YIR012W:RPL17B/YJL177W:MRT4/YKL009W:EBP2/YKL172W:RPL17A/YKL180W:RPF2/YKR081C:DRS1/YLL008W:MDN1/YLR106C:RPL37A/YLR185W:RPP0/YLR340W:HAS1/YMR290…
32991	macromolecular complex	173 out of 251 genes, 68.9%	1997 out of 4922 background genes, 40.6%	1.24e-18	0	WT levels	MAK16/YAL025C:RBG1/YAL036C:RPL19B/YBL027W:PRS4/YBL068W:RPL23A/YBL087C:RPL32/YBL092W:RPL4A/YBR031W:RPL19A/YBR084C-A:RPS6B/YBR181C:RPL21A/YBR191W:REI1/YBR267W:KRR1/YCL059C:RPS14A/YCR031C:PWP2/YCR057C:RSA4/YCR072C:NOP1/YDL014W:TSR1/YDL060W:RPS29B/YDL061C:RPL31A/YDL075W:RPL13A/YDL082W:RPS16B/YDL083C:RRP42/YDL111C:RPP1B/YDL130W:RPL35A/YDL191W:NHP2/YDL208W:NOP6/YDL213C:SSB1/YDL229W:RPL4B/YDR012W:RPS11A…
5730	nucleolus	51 out of 251 genes, 20.3%	244 out of 4922 background genes, 5.0%	2.96e-17	0	up-regulated	MAK16/YAL025C:KRR1/YCL059C:PWP2/YCR057C:RSA4/YCR072C:YCR087C-A:NOP1/YDL014W:LHP1/YDL051W:TSR1/YDL060W:NHP2/YDL208W:NOP6/YDL213C:RRP1/YDR087C:ARX1/YDR101C:RPA14/YDR156W:UTP5/YDR398W:NSA1/YGL111W:NOP7/YGR103W:NSR1/YGR159C:ZUO1/YGR285C:RRP3/YHR065C:SSF1/YHR066W:RPF1/YHR088W:GAR1/YHR089C:RRT14/YIL127C:MRT4/YKL009W:EBP2/YKL172W:RPF2/YKR081C:SRP40/YKR092C:DRS1/YLL008W:EMG1/YLR186W:PWP1/YLR196W:DBP9/YLR…
30686	90S preribosome	25 out of 251 genes, 10.0%	85 out of 4922 background genes, 1.7%	2.3e-11	0	up-regulated	KRR1/YCL059C:RPS14A/YCR031C:PWP2/YCR057C:NOP1/YDL014W:TSR1/YDL060W:NOP6/YDL213C:RPS11A/YDR025W:RPS13/YDR064W:RPS8B/YER102W:NOP7/YGR103W:RPS0A/YGR214W:RPS4B/YHR203C:RPS5/YJR123W:RPS4A/YJR145C:EMG1/YLR186W:RPP0/YLR340W:HAS1/YMR290C:KRE33/YNL132W:RCL1/YOL010W:PNO1/YOR145C:YTM1/YOR272W:RPS9A/YPL081W:RPS6A/YPL090C:NAN1/YPL126W:DIM1/YPL266W
44446	intracellular organelle part	171 out of 251 genes, 68.1%	2353 out of 4922 background genes, 47.8%	2.21e-09	0	WT levels	MAK16/YAL025C:RPL19B/YBL027W:RPL23A/YBL087C:RPL32/YBL092W:RPL4A/YBR031W:RPL19A/YBR084C-A:RPS6B/YBR181C:RPL21A/YBR191W:REI1/YBR267W:KRR1/YCL059C:RPS14A/YCR031C:PWP2/YCR057C:RSA4/YCR072C:YCR087C-A:NOP1/YDL014W:LHP1/YDL051W:TSR1/YDL060W:RPS29B/YDL061C:RPL31A/YDL075W:RPL13A/YDL082W:RPS16B/YDL083C:RRP42/YDL111C:RPP1B/YDL130W:RPL35A/YDL191W:NHP2/YDL208W:NOP6/YDL213C:RPL4B/YDR012W:RPS11A/YDR025W:RSM10/Y…
44422	organelle part	171 out of 251 genes, 68.1%	2361 out of 4922 background genes, 48.0%	3.15e-09	0	WT levels	MAK16/YAL025C:RPL19B/YBL027W:RPL23A/YBL087C:RPL32/YBL092W:RPL4A/YBR031W:RPL19A/YBR084C-A:RPS6B/YBR181C:RPL21A/YBR191W:REI1/YBR267W:KRR1/YCL059C:RPS14A/YCR031C:PWP2/YCR057C:RSA4/YCR072C:YCR087C-A:NOP1/YDL014W:LHP1/YDL051W:TSR1/YDL060W:RPS29B/YDL061C:RPL31A/YDL075W:RPL13A/YDL082W:RPS16B/YDL083C:RRP42/YDL111C:RPP1B/YDL130W:RPL35A/YDL191W:NHP2/YDL208W:NOP6/YDL213C:RPL4B/YDR012W:RPS11A/YDR025W:RSM10/Y…
32040	small-subunit processome	15 out of 251 genes, 6.0%	50 out of 4922 background genes, 1.0%	1.32e-06	0	WT levels	RPS6B/YBR181C:KRR1/YCL059C:RPS14A/YCR031C:PWP2/YCR057C:NOP1/YDL014W:UTP5/YDR398W:RPS2/YGL123W:RPS14B/YJL191W:EMG1/YLR186W:UTP14/YML093W:RPS7B/YNL096C:UTP23/YOR004W:RPS9A/YPL081W:RPS6A/YPL090C:NAN1/YPL126W
31981	nuclear lumen	59 out of 251 genes, 23.5%	714 out of 4922 background genes, 14.5%	0.00705	0	WT levels	MAK16/YAL025C:KRR1/YCL059C:PWP2/YCR057C:RSA4/YCR072C:YCR087C-A:NOP1/YDL014W:LHP1/YDL051W:TSR1/YDL060W:RRP42/YDL111C:NHP2/YDL208W:NOP6/YDL213C:RRP1/YDR087C:ARX1/YDR101C:RPA14/YDR156W:UTP5/YDR398W:NSA1/YGL111W:NOP7/YGR103W:NSR1/YGR159C:ZUO1/YGR285C:RRP3/YHR065C:SSF1/YHR066W:RRP4/YHR069C:RPF1/YHR088W:GAR1/YHR089C:RRT14/YIL127C:TAH11/YJR046W:NPA3/YJR072C:MRT4/YKL009W:EBP2/YKL172W:KAE1/YKR038C:RPF2/YK…
Note: Only S. uvarum genes that have S. cerevisiae homologs are included in this GO-term analysis. The background gene set was adjusted in this way as well. GO-term analysis was conducted in SGD (http://www.yeastgenome.org/cgi-bin/GO/goTermFinder.pl)

## Sheet: 14h_DnMut
GO-Term enriched for genes that are two-folds down-regulated in S. uvarum gal80∆ gal80b∆ relative to wild-type at FDR=0.05 after the growth resumed (mid-log phase)
Process
GOID	GO_term	Cluster frequency	Background frequency	p-value	FDR	Status at TGA	Gene(s) annotated to the term
6772	thiamine metabolic process	6 out of 122 genes, 4.9%	8 out of 4922 background genes, 0.2%	2.71e-06	0	WT levels	THI2/YBR240C:PET18/YCR020C:THI4/YGR144W:THI20/YOL055C:THI6/YPL214C:THI21/YPL258C
42723	thiamine-containing compound metabolic process	6 out of 122 genes, 4.9%	9 out of 4922 background genes, 0.2%	7.98e-06	0	WT levels	THI2/YBR240C:PET18/YCR020C:THI4/YGR144W:THI20/YOL055C:THI6/YPL214C:THI21/YPL258C
42402	cellular biogenic amine catabolic process	5 out of 122 genes, 4.1%	7 out of 4922 background genes, 0.1%	8.56e-05	0	WT levels	ARO10/YDR380W:BNA2/YJR078W:PDC5/YLR134W:ALD3/YMR169C:ALD2/YMR170C
42724	thiamine-containing compound biosynthetic process	5 out of 122 genes, 4.1%	7 out of 4922 background genes, 0.1%	8.56e-05	0	WT levels	THI2/YBR240C:THI4/YGR144W:THI20/YOL055C:THI6/YPL214C:THI21/YPL258C
9228	thiamine biosynthetic process	5 out of 122 genes, 4.1%	7 out of 4922 background genes, 0.1%	8.56e-05	0	WT levels	THI2/YBR240C:THI4/YGR144W:THI20/YOL055C:THI6/YPL214C:THI21/YPL258C
6825	copper ion transport	6 out of 122 genes, 4.9%	14 out of 4922 background genes, 0.3%	0.00026	0	WT levels	CCC2/YDR270W:PIC2/YER053C:FRE6/YLL051C:FRE1/YLR214W:FET4/YMR319C:CTR1/YPR124W
44281	small molecule metabolic process	35 out of 122 genes, 28.7%	626 out of 4922 background genes, 12.7%	0.00079	0	WT levels	TKL2/YBR117C:THI2/YBR240C:CIT2/YCR005C:PET18/YCR020C:ARO10/YDR380W:PPN1/YDR452W:ARG5,6/YER069W:RNR1/YER070W:BNA6/YFR047C:TOS3/YGL179C:UGA1/YGR019W:THI4/YGR144W:ENO1/YGR254W:GND2/YGR256W:LYS1/YIR034C:BNA2/YJR078W:PDC5/YLR134W:BNA5/YLR231C:GAL80/YML051W:PHO84/YML123C:PLB1/YMR008C:ALD3/YMR169C:ALD2/YMR170C:GAD1/YMR250W:SPS19/YNL202W:LYS9/YNR050C:BIO3/YNR058W:THI20/YOL055C:ARG1/YOL058W:ARG8/YOL140W:C…
15677	copper ion import	4 out of 122 genes, 3.3%	5 out of 4922 background genes, 0.1%	0.00087	0	WT levels	FRE6/YLL051C:FRE1/YLR214W:FET4/YMR319C:CTR1/YPR124W
41	transition metal ion transport	8 out of 122 genes, 6.6%	36 out of 4922 background genes, 0.7%	0.00094	0	WT levels	CCC2/YDR270W:PIC2/YER053C:FRE6/YLL051C:SMF3/YLR034C:FRE1/YLR214W:PHO84/YML123C:FET4/YMR319C:CTR1/YPR124W
9310	amine catabolic process	5 out of 122 genes, 4.1%	10 out of 4922 background genes, 0.2%	0.00097	0	WT levels	ARO10/YDR380W:BNA2/YJR078W:PDC5/YLR134W:ALD3/YMR169C:ALD2/YMR170C
1901565	organonitrogen compound catabolic process	11 out of 122 genes, 9.0%	76 out of 4922 background genes, 1.5%	0.001	0	up-regulated	YPC1/YBR183W:ARO10/YDR380W:UGA1/YGR019W:BNA2/YJR078W:PDC5/YLR134W:HMX1/YLR205C:CTS1/YLR286C:ALD3/YMR169C:ALD2/YMR170C:GAD1/YMR250W:THI20/YOL055C
43436	oxoacid metabolic process	23 out of 122 genes, 18.9%	327 out of 4922 background genes, 6.6%	0.00179	0	up-regulated	CIT2/YCR005C:ARO10/YDR380W:PPN1/YDR452W:ARG5,6/YER069W:BNA6/YFR047C:UGA1/YGR019W:ENO1/YGR254W:LYS1/YIR034C:BNA2/YJR078W:PDC5/YLR134W:BNA5/YLR231C:PHO84/YML123C:ALD3/YMR169C:ALD2/YMR170C:GAD1/YMR250W:SPS19/YNL202W:LYS9/YNR050C:BIO3/YNR058W:ARG1/YOL058W:ARG8/YOL140W:CRC1/YOR100C:VTC3/YPL019C:EEB1/YPL095C
6082	organic acid metabolic process	23 out of 122 genes, 18.9%	327 out of 4922 background genes, 6.6%	0.00179	0	up-regulated	CIT2/YCR005C:ARO10/YDR380W:PPN1/YDR452W:ARG5,6/YER069W:BNA6/YFR047C:UGA1/YGR019W:ENO1/YGR254W:LYS1/YIR034C:BNA2/YJR078W:PDC5/YLR134W:BNA5/YLR231C:PHO84/YML123C:ALD3/YMR169C:ALD2/YMR170C:GAD1/YMR250W:SPS19/YNL202W:LYS9/YNR050C:BIO3/YNR058W:ARG1/YOL058W:ARG8/YOL140W:CRC1/YOR100C:VTC3/YPL019C:EEB1/YPL095C
6576	cellular biogenic amine metabolic process	8 out of 122 genes, 6.6%	40 out of 4922 background genes, 0.8%	0.0022	0	WT levels	ARO10/YDR380W:BNA6/YFR047C:BNA2/YJR078W:PDC5/YLR134W:BNA5/YLR231C:PLB1/YMR008C:ALD3/YMR169C:ALD2/YMR170C
72527	pyrimidine-containing compound metabolic process	7 out of 122 genes, 5.7%	29 out of 4922 background genes, 0.6%	0.00236	0	WT levels	THI2/YBR240C:PET18/YCR020C:THI4/YGR144W:THI20/YOL055C:THI80/YOR143C:THI6/YPL214C:THI21/YPL258C
42430	indole-containing compound metabolic process	5 out of 122 genes, 4.1%	12 out of 4922 background genes, 0.2%	0.00292	0	WT levels	ARO10/YDR380W:BNA6/YFR047C:BNA2/YJR078W:PDC5/YLR134W:BNA5/YLR231C
6568	tryptophan metabolic process	5 out of 122 genes, 4.1%	12 out of 4922 background genes, 0.2%	0.00292	0	WT levels	ARO10/YDR380W:BNA6/YFR047C:BNA2/YJR078W:PDC5/YLR134W:BNA5/YLR231C
6586	indolalkylamine metabolic process	5 out of 122 genes, 4.1%	12 out of 4922 background genes, 0.2%	0.00292	0	WT levels	ARO10/YDR380W:BNA6/YFR047C:BNA2/YJR078W:PDC5/YLR134W:BNA5/YLR231C
44272	sulfur compound biosynthetic process	8 out of 122 genes, 6.6%	43 out of 4922 background genes, 0.9%	0.0039	0	WT levels	THI2/YBR240C:ARO10/YDR380W:THI4/YGR144W:BIO3/YNR058W:THI20/YOL055C:THI80/YOR143C:THI6/YPL214C:THI21/YPL258C
6879	cellular iron ion homeostasis	7 out of 122 genes, 5.7%	33 out of 4922 background genes, 0.7%	0.00595	0	WT levels	CCC2/YDR270W:SIT1/YEL065W:FRE6/YLL051C:SMF3/YLR034C:TIS11/YLR136C:HMX1/YLR205C:FRE3/YOR381W
55072	iron ion homeostasis	7 out of 122 genes, 5.7%	34 out of 4922 background genes, 0.7%	0.00734	0	WT levels	CCC2/YDR270W:SIT1/YEL065W:FRE6/YLL051C:SMF3/YLR034C:TIS11/YLR136C:HMX1/YLR205C:FRE3/YOR381W
6766	vitamin metabolic process	7 out of 122 genes, 5.7%	34 out of 4922 background genes, 0.7%	0.00734	0	WT levels	THI2/YBR240C:PET18/YCR020C:THI4/YGR144W:BIO3/YNR058W:THI20/YOL055C:THI6/YPL214C:THI21/YPL258C
6767	water-soluble vitamin metabolic process	7 out of 122 genes, 5.7%	34 out of 4922 background genes, 0.7%	0.00734	0	WT levels	THI2/YBR240C:PET18/YCR020C:THI4/YGR144W:BIO3/YNR058W:THI20/YOL055C:THI6/YPL214C:THI21/YPL258C
72528	pyrimidine-containing compound biosynthetic process	6 out of 122 genes, 4.9%	24 out of 4922 background genes, 0.5%	0.00942	0	WT levels	THI2/YBR240C:THI4/YGR144W:THI20/YOL055C:THI80/YOR143C:THI6/YPL214C:THI21/YPL258C
6812	cation transport	12 out of 122 genes, 9.8%	114 out of 4922 background genes, 2.3%	0.01	0	WT levels	CCC2/YDR270W:PIC2/YER053C:TPO2/YGR138C:FRE6/YLL051C:SMF3/YLR034C:FRE1/YLR214W:PHO84/YML123C:FET4/YMR319C:MEP2/YNL142W:SIA1/YOR137C:PMA2/YPL036W:CTR1/YPR124W
Function
GOID	GO_term	Cluster frequency	Background frequency	p-value	FDR	Status at TGA	Gene(s) annotated to the term
16491	oxidoreductase activity	18 out of 122 genes, 14.8%	234 out of 4922 background genes, 4.8%	0.00168	0	WT levels	GRX7/YBR014C:TRX3/YCR083W:FRD1/YEL047C:ARG5,6/YER069W:RNR1/YER070W:GND2/YGR256W:LYS1/YIR034C:GTT1/YIR038C:BNA2/YJR078W:FRE6/YLL051C:HMX1/YLR205C:FRE1/YLR214W:ALD3/YMR169C:ALD2/YMR170C:SCS7/YMR272C:SPS19/YNL202W:LYS9/YNR050C:FRE3/YOR381W
46915	transition metal ion transmembrane transporter activity	6 out of 122 genes, 4.9%	24 out of 4922 background genes, 0.5%	0.00226	0	WT levels	SIT1/YEL065W:PIC2/YER053C:ARN1/YHL040C:PHO84/YML123C:FET4/YMR319C:CTR1/YPR124W
16723	oxidoreductase activity, oxidizing metal ions, NAD or NADP as acceptor	3 out of 122 genes, 2.5%	4 out of 4922 background genes, 0.1%	0.00689	0.01	WT levels	FRE6/YLL051C:FRE1/YLR214W:FRE3/YOR381W
293	ferric-chelate reductase activity	3 out of 122 genes, 2.5%	4 out of 4922 background genes, 0.1%	0.00689	0.01	WT levels	FRE6/YLL051C:FRE1/YLR214W:FRE3/YOR381W
5375	copper ion transmembrane transporter activity	3 out of 122 genes, 2.5%	4 out of 4922 background genes, 0.1%	0.00689	0	WT levels	PIC2/YER053C:FET4/YMR319C:CTR1/YPR124W
Component
GOID	GO_term	Cluster frequency	Background frequency	p-value	FDR	Status at TGA	Gene(s) annotated to the term
322	storage vacuole	29 out of 122 genes, 23.8%	372 out of 4922 background genes, 7.6%	1.35e-06	0	WT levels	GRX7/YBR014C:YBR241C:ATG22/YCL038C:YDR089W:PPN1/YDR452W:SIT1/YEL065W:AMS1/YGL156W:TPO2/YGR138C:ENO1/YGR254W:TNA1/YGR260W:VMR1/YHL035C:ARN1/YHL040C:DSE2/YHR143W:YIL067C:PRY1/YJL079C:YJL132W:CIS3/YJL158C:FRE6/YLL051C:SMF3/YLR034C:CRR1/YLR213C:CTS1/YLR286C:PHO84/YML123C:FET4/YMR319C:YNL217W:RSB1/YOR049C:FRE3/YOR381W:NCR1/YPL006W:VTC3/YPL019C:RNY1/YPL123C
323	lytic vacuole	29 out of 122 genes, 23.8%	372 out of 4922 background genes, 7.6%	1.35e-06	0	WT levels	GRX7/YBR014C:YBR241C:ATG22/YCL038C:YDR089W:PPN1/YDR452W:SIT1/YEL065W:AMS1/YGL156W:TPO2/YGR138C:ENO1/YGR254W:TNA1/YGR260W:VMR1/YHL035C:ARN1/YHL040C:DSE2/YHR143W:YIL067C:PRY1/YJL079C:YJL132W:CIS3/YJL158C:FRE6/YLL051C:SMF3/YLR034C:CRR1/YLR213C:CTS1/YLR286C:PHO84/YML123C:FET4/YMR319C:YNL217W:RSB1/YOR049C:FRE3/YOR381W:NCR1/YPL006W:VTC3/YPL019C:RNY1/YPL123C
324	fungal-type vacuole	29 out of 122 genes, 23.8%	372 out of 4922 background genes, 7.6%	1.35e-06	0	WT levels	GRX7/YBR014C:YBR241C:ATG22/YCL038C:YDR089W:PPN1/YDR452W:SIT1/YEL065W:AMS1/YGL156W:TPO2/YGR138C:ENO1/YGR254W:TNA1/YGR260W:VMR1/YHL035C:ARN1/YHL040C:DSE2/YHR143W:YIL067C:PRY1/YJL079C:YJL132W:CIS3/YJL158C:FRE6/YLL051C:SMF3/YLR034C:CRR1/YLR213C:CTS1/YLR286C:PHO84/YML123C:FET4/YMR319C:YNL217W:RSB1/YOR049C:FRE3/YOR381W:NCR1/YPL006W:VTC3/YPL019C:RNY1/YPL123C
5576	extracellular region	7 out of 122 genes, 5.7%	19 out of 4922 background genes, 0.4%	1.79e-05	0	WT levels	MFA1/YDR461W:DSE2/YHR143W:PRY1/YJL079C:CIS3/YJL158C:CTS1/YLR286C:MFA2/YNL145W:RNY1/YPL123C
5773	vacuole	29 out of 122 genes, 23.8%	475 out of 4922 background genes, 9.7%	0.00027	0	WT levels	GRX7/YBR014C:YBR241C:ATG22/YCL038C:YDR089W:PPN1/YDR452W:SIT1/YEL065W:AMS1/YGL156W:TPO2/YGR138C:ENO1/YGR254W:TNA1/YGR260W:VMR1/YHL035C:ARN1/YHL040C:DSE2/YHR143W:YIL067C:PRY1/YJL079C:YJL132W:CIS3/YJL158C:FRE6/YLL051C:SMF3/YLR034C:CRR1/YLR213C:CTS1/YLR286C:PHO84/YML123C:FET4/YMR319C:YNL217W:RSB1/YOR049C:FRE3/YOR381W:NCR1/YPL006W:VTC3/YPL019C:RNY1/YPL123C
5886	plasma membrane	21 out of 122 genes, 17.2%	319 out of 4922 background genes, 6.5%	0.00268	0	WT levels	HSP30/YCR021C:MRH1/YDR033W:FRD1/YEL047C:TPO2/YGR138C:ENO1/YGR254W:GND2/YGR256W:TNA1/YGR260W:ARN1/YHL040C:GTT1/YIR038C:CIS3/YJL158C:FRE1/YLR214W:THI7/YLR237W:PHO84/YML123C:PLB1/YMR008C:FET4/YMR319C:MEP2/YNL142W:RSB1/YOR049C:PNS1/YOR161C:FRE3/YOR381W:PMA2/YPL036W:CTR1/YPR124W
Note: Only S. uvarum genes that have S. cerevisiae homologs are included in this GO-term analysis. The background gene set was adjusted in this way as well. GO-term analysis was conducted in SGD (http://www.yeastgenome.org/cgi-bin/GO/goTermFinder.pl)

## Sheet: GOslim_4h_UpMut
GO-Slim Mapper results for genes that are two-folds up-regulated in S. uvarum gal80∆ gal80b∆ relative to wild-type at FDR=0.05 during TGA
Function
GOID	GO term	Frequency	Genome Frequency	Corrected hypergeometric test (p-val)	Gene(s)
5198	structural molecule activity	6 out of 544 genes, 1.1%	350 of 6338 genes, 5.5%	9.26106e-07	TIP1,SED1,ACT1,CWP1,CCW14,KRE1
16491	oxidoreductase activity	44 out of 544 genes, 8.1%	281 of 6338 genes, 4.4%	0.00124867	GCV3,UGA2,GRX7,LYS2,GPX2,LEU2,TRX3,GDH2,GCV1,CTA1,TSA2,FRD1,ARG5,6,ALD5,SER3,RPH1,POX1,CTT1,TRX2,OYE2,LYS12,LYS1,TDH1,MAE1,SRX1,FOX2,CCP1,MTD1,FRE6,PUT1,ADI1,ALD3,ALD2,GCV2,ADH2,YNL134C,SPS19,FRE4,GPD2,MDH2,ALD4,FRE3,YPL088W,OYE3
3723	RNA binding	45 out of 544 genes, 8.3%	844 of 6338 genes, 13.3%	0.00179305	HSP26,MUD1,YBR238C,ENP1,SRO9,NHP2,NOP6,MAK21,CTH1,ESF1,NPL3,PUF6,LOC1,UPF3,NOP7,SSF1,NOP10,RPF1,IMP3,CRG1,SGN1,LYS1,NOP9,PRP21,MRT4,EBP2,TIS11,RMP1,CBF5,NOP56,MAP1,YHC1,ERB1,HAS1,RLP7,IMP4,NOP15,MPP6,BUD21,HSH49,NOP4,NOP53,PUS1,BMS1,NEW1
4518	nuclease activity	3 out of 544 genes, 0.6%	137 of 6338 genes, 2.2%	0.0648364	RAI1,RNT1,REX4
3729	mRNA binding	24 out of 544 genes, 4.4%	172 of 6338 genes, 2.7%	0.241426	HSP26,YBR238C,SRO9,MAK21,CTH1,NPL3,PUF6,LOC1,UPF3,NOP7,CRG1,LYS1,NOP9,EBP2,TIS11,CBF5,NOP56,MAP1,YHC1,RLP7,NOP4,PUS1,BMS1,NEW1
988	transcription factor activity, protein binding	18 out of 544 genes, 3.3%	124 of 6338 genes, 2%	0.410135	ROX3,UGA3,NRG1,SPT15,BUR6,GAT1,TFG2,VHR1,IME1,BAS1,IFH1,RRN11,ARG81,SUB1,MED11,WTM2,CUP9,ROX1
8092	cytoskeletal protein binding	1 out of 544 genes, 0.2%	67 of 6338 genes, 1.1%	0.66306	RVS161
3674	molecular function unknown	172 out of 544 genes, 31.6%	1849 of 6338 genes, 29.2%	0.726074	MAK16,ECM1,YBL028C,YBL029W,MOH1,MRX3,RCR1,YBR056W-A,YBR085C-A,ICS2,SDS24,ATG22,YCL048W-A,YCR016W,HSP30,RRP43,YCR087C-A,GPM2,SNA4,UGX2,YDL177C,MRH1,YDR132C,CWC15,YDR186C,YDR249C,YDR262W,BSC2,PHM6,FCF1,SEM1,HEH2,YDR461C-A,SPP41,SNA2,PMP2,PXP1,UTR5,NOP16,FMP52,HVG1,SPO73,TDA2,YER079W,UTP7,YER084W,NSA2,LCP5,YER137C,SPI1,YER158C,OSW7,ERJ5,CGR1,YGL088W,YGL117W,BUD13,ZIP2,SLX9,ECL1,RTS3,LSO2,RTA1,SPG1,S…
1071	nucleic acid binding transcription factor activity	21 out of 544 genes, 3.9%	163 of 6338 genes, 2.6%	0.732744	SMP1,UGA3,NRG1,ACA1,SPT15,RPH1,GAT1,PDR1,MGA1,STP2,VHR1,PHD1,DAL80,BAS1,RRN11,TAF13,GAT2,WTM2,RLM1,CUP9,ROX1
16829	lyase activity	13 out of 544 genes, 2.4%	90 of 6338 genes, 1.4%	0.973437	CHA1,ARO10,ICL1,LEU1,ENO1,ARG4,DAL3,ACO2,CAB3,FOX2,ADE13,GAD1,NCE103
22857	transmembrane transporter activity	35 out of 544 genes, 6.4%	319 of 6338 genes, 5.0%	1.04079	FUR4,YMC2,CTP1,SUL1,ADY2,FEN2,CCC2,CAN1,SIT1,PMC1,ZRT1,MEP1,TPO2,HIP1,TNA1,DUR3,VMR1,ARN1,QDR1,DAL4,SFC1,OAC1,GAP1,SMF3,THI7,PHO84,YHM2,FET4,AQR1,MEP2,CRC1,PXA1,VMA11,DIP5,MEP3
8233	peptidase activity	6 out of 544 genes, 1.1%	138 of 6338 genes, 2.2%	1.05276	YBR139W,PRB1,WSS1,CPS1,MAP1,YSP3
16787	hydrolase activity	65 out of 544 genes, 11.9%	870 of 6338 genes, 13.7%	1.05938	NTH2,TIP1,RAD16,YBR139W,PRP5,DBP10,CCC2,INM2,PHO8,PRB1,GPP2,GLC7,MAG1,PMC1,RAD6,DBP3,NBP35,ROK1,SDT1,RAI1,CLD1,VMR1,INM1,RRP3,WSS1,DSE2,GPP1,YVH1,DAL2,HCA4,CPS1,YPT52,YSR3,MAP1,CDD1,YPT6,CTS1,FBP1,PLB1,SNZ1,ADE17,ECM16,DDR48,RNT1,HAS1,RHO2,OCA1,AAH1,RHO5,MGS1,THI20,REX4,YSP3,GLO4,VPS21,DCS2,YOR283W,GDE1,CAR1,PXA1,BMS1,NEW1,VMA11,ATH1,KRE6
30234	enzyme regulator activity	26 out of 544 genes, 4.8%	232 of 6338 genes, 3.7%	1.40701	REG2,GYP7,GIC2,AGE1,CLG1,RAI1,LST7,PCL5,SPL2,YHR138C,PIG2,RCN1,MNN4,RLP24,CCS1,HLJ1,PAI3,PBI2,MGS1,STD1,BAG7,SPP2,GPB1,RMI1,SGF11,CAR1
16301	kinase activity	11 out of 544 genes, 2.0%	195 of 6338 genes, 3.1%	1.57306	YPK3,KIN82,RTK1,BUD16,ARG5,6,ATG1,PFK1,RIO2,THI20,LCB4,HRR25
16791	phosphatase activity	12 out of 544 genes, 2.2%	94 of 6338 genes, 1.5%	2.12914	INM2,PHO8,GPP2,GLC7,SDT1,INM1,GPP1,YVH1,YSR3,FBP1,OCA1,YOR283W
16740	transferase activity	68 out of 544 genes, 12.5%	831 of 6338 genes, 13.1%	2.14942	CDC19,PRS4,YPK3,TRM7,UBC4,RAD16,RPB5,CIT2,KIN82,RTK1,ARO3,CDC34,UBC5,RRP8,ALT2,HEM1,NSE3,HPT1,KRE2,UBC8,BUD16,YAT2,HIS1,CEM1,ARG5,6,UBC6,TMT1,ACT1,TYW3,RAD6,ATG1,UGA1,NQM1,PFK1,BIO2,YNG2,ARO9,RPC10,BAT1,CRG1,AIR1,BMT5,REV7,ARG3,URA2,RPA34,KTR2,ECM4,SHM2,UCC1,CAR2,CAT2,ARG7,ILV2,ADE17,ADE4,KTR5,DMA2,MLS1,CHS1,RIO2,THI20,LEU9,LCB4,HRR25,CIT3,RPC40,HPA2
16779	nucleotidyltransferase activity	6 out of 544 genes, 1.1%	121 of 6338 genes, 1.9%	2.19833	RPB5,RPC10,AIR1,REV7,RPA34,RPC40
16887	ATPase activity	18 out of 544 genes, 3.3%	263 of 6338 genes, 4.1%	2.47126	RAD16,PRP5,DBP10,CCC2,PMC1,RAD6,DBP3,NBP35,ROK1,VMR1,RRP3,HCA4,DDR48,HAS1,MGS1,PXA1,NEW1,VMA11
8289	lipid binding	5 out of 544 genes, 0.9%	101 of 6338 genes, 1.6%	2.91852	RVS161,PMP3,GIC2,AGE1,HSP12
5085	guanyl-nucleotide exchange factor activity	1 out of 544 genes, 0.2%	46 of 6338 genes, 0.7%	3.03901	SDO1
3677	DNA binding	34 out of 544 genes, 6.3%	389 of 6338 genes, 6.1%	3.22534	RAD16,SMP1,ADF1,UGA3,NRG1,NSE3,ACA1,DOT6,COM2,MAG1,SPT15,BUR6,RPH1,GAT1,PDR1,RAD6,TOS8,MGA1,STP2,VHR1,PHD1,DAL80,SRL3,BAS1,RRN11,YHM2,IMP4,ADE12,CIN5,RMI1,RLM1,CUP9,USV1,ROX1
32182	ubiquitin-like protein binding	1 out of 544 genes, 0.2%	43 of 6338 genes, 0.7%	3.72386	UBC4
42393	histone binding	1 out of 544 genes, 0.2%	41 of 6338 genes, 0.6%	4.25249	YNG2
43167	ion binding	14 out of 544 genes, 2.6%	183 of 6338 genes, 2.9%	4.41358	KTI11,CCC2,PMP3,GIC2,AGE1,NBP35,THI4,RPC10,CCS1,ILV2,CAR1,ISU1,BMS1,NEW1
19899	enzyme binding	3 out of 544 genes, 0.6%	66 of 6338 genes, 1.0%	4.4433	GIC2,NPL3,RCN1
16798	hydrolase activity, acting on glycosyl bonds	6 out of 544 genes, 1.1%	47 of 6338 genes, 0.7%	4.77471	NTH2,MAG1,DSE2,CTS1,ATH1,KRE6
16874	ligase activity	10 out of 544 genes, 1.8%	97 of 6338 genes, 1.5%	4.91453	ACS1,ADE1,ADE5,7,URA2,CPA2,FAA4,ADE12,ARG1,CPA1,GLN1
3682	chromatin binding	7 out of 544 genes, 1.3%	107 of 6338 genes, 1.7%	4.99602	SPT15,BUR6,LIF1,TOS8,KTI12,NOC3,SUB1
19843	rRNA binding	10 out of 544 genes, 1.8%	104 of 6338 genes, 1.6%	5.45154	NOP6,SSF1,RPF1,MRT4,RMP1,ERB1,RLP7,IMP4,NOP15,NOP53
3924	GTPase activity	7 out of 544 genes, 1.3%	63 of 6338 genes, 1%	5.50832	YPT52,YPT6,DDR48,RHO2,RHO5,VPS21,BMS1
8168	methyltransferase activity	6 out of 544 genes, 1.1%	90 of 6338 genes, 1.4%	5.84675	TRM7,RRP8,TMT1,TYW3,CRG1,BMT5
51082	unfolded protein binding	4 out of 544 genes, 0.7%	70 of 6338 genes, 1.1%	5.86127	HSP26,SQT1,ROT1,PNO1
16757	transferase activity, transferring glycosyl groups	7 out of 544 genes, 1.3%	96 of 6338 genes, 1.5%	6.14809	HPT1,KRE2,HIS1,KTR2,ADE4,KTR5,CHS1
8134	transcription factor binding	7 out of 544 genes, 1.3%	69 of 6338 genes, 1.1%	6.27834	NRG1,DIG2,SPT15,RRN11,MED11,CIN5,CUP9
4386	helicase activity	7 out of 544 genes, 1.3%	86 of 6338 genes, 1.4%	6.80845	DBP10,DBP3,ROK1,RRP3,HCA4,ECM16,HAS1
30674	protein binding, bridging	4 out of 544 genes, 0.7%	61 of 6338 genes, 1%	7.50001	UBC4,UCC1,ATG39,ATG19
16853	isomerase activity	5 out of 544 genes, 0.9%	59 of 6338 genes, 0.9%	8.10276	TPI1,GPM1,CBF5,PUS1,ARO7
4871	signal transducer activity	3 out of 544 genes, 0.6%	38 of 6338 genes, 0.6%	10.1772	GPR1,GPG1,GPB1
30533	triplet codon-amino acid adaptor activity	0 out of 544 genes, 0%	299 of 6338 genes, 4.7%	--	none
3735	structural constituent of ribosome	0 out of 544 genes, 0%	231 of 6338 genes, 3.6%	--	none
30555	RNA modification guide activity	0 out of 544 genes, 0%	71 of 6338 genes, 1.1%	--	none
8565	protein transporter activity	0 out of 544 genes, 0%	51 of 6338 genes, 0.8%	--	none
8135	translation factor activity, RNA binding	0 out of 544 genes, 0%	43 of 6338 genes, 0.7%	--	none
other	other	27 out of 544 genes, 5%	--	--	ATG8,CNS1,MCH1,SLU7,YEA6,MF(ALPHA)2,SEC9,VHT1,ASK10,BTN2,PEX21,ISY1,DRE2,UBI4,SPG5,VTI1,SLZ1,PDR16,PDR17,IZH2,MCH4,PEP12,MCH5,SNC2,TIF6,SNT309,CUR1
Process
GOID	GO term	Frequency	Genome Frequency	Corrected hypergeometric test (p-val)	Gene(s)
42273	ribosomal large subunit biogenesis	33 out of 544 genes, 6.1%	103 of 6338 genes, 1.6%	6.5336e-10	MAK16,DBP10,MAK21,RRP8,PUF6,NOP16,NSA2,LOC1,DBP3,RAI1,NOP7,SDA1,SSF1,RPF1,SQT1,YVH1,ALB1,MRT4,RRP14,RLP24,ERB1,HAS1,RLP7,NOP15,REX4,RRS1,NOP4,NOP53,RSA1,HRR25,NIP7,TIF6,RRP15
6364	rRNA processing	59 out of 544 genes, 10.8%	311 of 6338 genes, 4.9%	1.50994e-07	MAK16,ENP1,RRP43,DBP10,NHP2,RRP8,FCF1,ESF1,UTP7,NSA2,LCP5,GLC7,LOC1,CGR1,DBP3,ROK1,RAI1,SLX9,NOP7,RRP3,SSF1,NOP10,RPF1,IMP3,BMT5,NOP9,HCA4,MRT4,UTP11,EBP2,UTP30,NOC3,FCF2,FYV7,RMP1,CBF5,NOP56,BUD22,ERB1,ECM16,RNT1,HAS1,RLP7,IMP4,RIO2,KRI1,MPP6,REX4,BUD21,PNO1,RRP36,RRS1,SNU66,NOP4,NOP53,NIP7,BMS1,TIF6,RRP15
7005	mitochondrion organization	8 out of 544 genes, 1.5%	420 of 6338 genes, 6.6%	2.57074e-07	ATG8,SED1,ACT1,ATG1,THI4,NCA3,YHM2,ATG41
42274	ribosomal small subunit biogenesis	31 out of 544 genes, 5.7%	135 of 6338 genes, 2.1%	1.73015e-05	ENP1,NOP6,FCF1,UTP7,LCP5,LOC1,ROK1,SLX9,NOP7,RRP3,IMP3,NOP9,RRP14,UTP11,UTP30,FCF2,FYV7,BUD22,ECM16,TMA23,HAS1,IMP4,RIO2,KRI1,BUD21,PNO1,RRP36,RRS1,HRR25,BMS1,NEW1
6520	cellular amino acid metabolic process	41 out of 544 genes, 7.5%	210 of 6338 genes, 3.3%	2.19587e-05	GCV3,UGA2,LYS2,LEU2,CHA1,CIT2,UGA3,GCV1,ARO10,HIS1,ARG5,6,SER3,LEU1,UGA1,ARG4,ARO9,BAT1,LYS12,LYS1,ARG3,URA2,CPA2,MAE1,MTD1,PUT1,CAR2,ARG81,ADI1,ARG7,ILV2,ALD3,ALD2,GCV2,GAD1,ADH2,ARG1,LEU9,CPA1,CAR1,GLN1,ARO7
70271	protein complex biogenesis	7 out of 544 genes, 1.3%	329 of 6338 genes, 5.2%	4.77285e-05	SEM1,PUN1,SPG5,DMA2,PNO1,PIN3,HPA2
32787	monocarboxylic acid metabolic process	28 out of 544 genes, 5.1%	134 of 6338 genes, 2.1%	0.000456601	CDC19,ACS1,UGA2,LEU2,CIT2,UGA3,TPI1,YAT2,CEM1,ICL1,ALD5,POX1,UGA1,PFK1,ENO1,BIO2,MGA2,TDH1,MAE1,GPM1,FOX2,CAT2,MLS1,SPS19,GLO4,CRC1,ALD4,CIT3
2181	cytoplasmic translation	2 out of 544 genes, 0.4%	179 of 6338 genes, 2.8%	0.00125077	TRM7,SRO9
6468	protein phosphorylation	4 out of 544 genes, 0.7%	199 of 6338 genes, 3.1%	0.00735539	YPK3,KIN82,ATG1,HRR25
6811	ion transport	38 out of 544 genes, 7%	240 of 6338 genes, 3.8%	0.00744459	CTP1,SUL1,ATG22,ADY2,FEN2,KIN82,CCC2,PMP3,PMP2,CAN1,PMC1,ZRT1,VHT1,MEP1,TPO2,BTN2,HIP1,PFK1,TNA1,DUR3,SFC1,OAC1,GAP1,FRE6,SMF3,PHO84,CCS1,YHM2,FAA4,FET4,AQR1,MEP2,PDR16,PDR17,MCH5,PXA1,DIP5,MEP3
6310	DNA recombination	3 out of 544 genes, 0.6%	174 of 6338 genes, 2.7%	0.0103482	RAD6,ZIP2,UPF3
278	mitotic cell cycle	11 out of 544 genes, 2.0%	319 of 6338 genes, 5.0%	0.0104286	CDC34,GIC2,BUD16,GLC7,ACT1,RAD6,BUD13,SDA1,GID8,DMA2,RMI1
7059	chromosome segregation	5 out of 544 genes, 0.9%	197 of 6338 genes, 3.1%	0.0315875	GLC7,ZIP2,DMA2,RMI1,HRR25
51052	regulation of DNA metabolic process	1 out of 544 genes, 0.2%	107 of 6338 genes, 1.7%	0.0641557	MGS1
6605	protein targeting	13 out of 544 genes, 2.4%	305 of 6338 genes, 4.8%	0.119427	ATG8,ATG1,PEX21,SPL2,SYS1,SRP21,YPT52,ATG19,MDH2,PEP12,VPS21,HRR25,ATG41
33043	regulation of organelle organization	12 out of 544 genes, 2.2%	289 of 6338 genes, 4.6%	0.123921	GYP7,GIC2,GLC7,ENO1,YVH1,IME1,UTH1,SUB1,DMA2,PDR16,WTM2,PIN3
6979	response to oxidative stress	18 out of 544 genes, 3.3%	101 of 6338 genes, 1.6%	0.130356	UGA2,GRX7,GPX2,HSP30,TRX3,CTA1,TSA2,HSP12,ACT1,NQM1,CTT1,ASK10,VHR1,SRX1,CCP1,GAD1,NCE103,OCA1
42221	response to chemical	54 out of 544 genes, 9.9%	440 of 6338 genes, 6.9%	0.152833	UGA2,GRX7,UBC4,GPX2,ADF1,HSP30,TRX3,KIN82,GPR1,UGA3,NRG1,CTA1,PMP3,TSA2,DIG2,FRD1,UBC6,GLC7,HSP12,GAT1,ACT1,PDR1,RAD6,MF(ALPHA)2,NQM1,CTT1,ASK10,VMR1,YHK8,VHR1,QDR1,MGA2,YJL144W,SRX1,DAL80,CCP1,UCC1,SUB1,IRC21,HLJ1,GAD1,NCE103,AQR1,OCA1,YNL134C,MDG1,PDR16,PDR17,IZH2,ATG19,CIN5,GPB1,USV1,ATH1
48285	organelle fission	13 out of 544 genes, 2.4%	297 of 6338 genes, 4.7%	0.175313	GIC2,GLC7,RAD6,ZIP2,YVH1,IME1,EBP2,SUB1,DMA2,SLZ1,PDR16,RMI1,HRR25
31399	regulation of protein modification process	2 out of 544 genes, 0.4%	115 of 6338 genes, 1.8%	0.181062	GLC7,ZIP2
6260	DNA replication	4 out of 544 genes, 0.7%	150 of 6338 genes, 2.4%	0.21003	GLC7,NOP7,NOC3,MGS1
32196	transposition	2 out of 544 genes, 0.4%	110 of 6338 genes, 1.7%	0.261107	SPT15,RPC40
7010	cytoskeleton organization	10 out of 544 genes, 1.8%	237 of 6338 genes, 3.7%	0.358165	RVS161,GIC2,ACT1,SDA1,ROT1,RHO2,NOP15,DMA2,HRR25,PIN3
6417	regulation of translation	2 out of 544 genes, 0.4%	104 of 6338 genes, 1.6%	0.4027	NPL3,PUF6
6325	chromatin organization	16 out of 544 genes, 2.9%	317 of 6338 genes, 5.0%	0.490121	ACS1,SEM1,DOT6,GLC7,RPH1,ACT1,RAD6,YNG2,MGA2,UTH1,IFH1,RNT1,EAF7,WTM2,SGF11,HPA2
6629	lipid metabolic process	14 out of 544 genes, 2.6%	286 of 6338 genes, 4.5%	0.54743	CEM1,POX1,CLD1,MGA2,FOX2,YSR3,PLB1,SPS19,PDR16,PDR17,CRC1,LCB4,GDE1,CIT3
6970	response to osmotic stress	15 out of 544 genes, 2.8%	91 of 6338 genes, 1.4%	0.58732	SMP1,RVS161,HSP30,NRG1,GPP2,HSP12,CTT1,GPP1,CAB3,MNN4,SUB1,CIN5,STD1,USV1,ROX1
32200	telomere organization	1 out of 544 genes, 0.2%	77 of 6338 genes, 1.2%	0.706649	RAD6
5975	carbohydrate metabolic process	31 out of 544 genes, 5.7%	255 of 6338 genes, 4.0%	1.13191	CDC19,NTH2,LEU2,CIT2,TPI1,INM2,KRE2,UBC8,GPP2,ICL1,GLC7,PFK1,ENO1,INM1,PIG2,GPP1,TDH1,KRE9,GPM1,MNN4,KTR2,FBP1,GID8,ROT1,KTR5,MLS1,GPD2,MDH2,STD1,ATH1,KRE6
51726	regulation of cell cycle	10 out of 544 genes, 1.8%	209 of 6338 genes, 3.3%	1.28163	GIC2,SEM1,GLC7,RAD6,SDA1,IME1,SUB1,GID8,DMA2,PDR16
7033	vacuole organization	14 out of 544 genes, 2.6%	92 of 6338 genes, 1.5%	1.3324	ATG8,GYP7,ACT1,ATG1,TRX2,ENO1,YHR138C,YVH1,YPT52,VTI1,PBI2,PEP12,VPS21,ATG41
8150	biological process unknown	101 out of 544 genes, 18.6%	1049 of 6338 genes, 16.6%	1.99233	YBL028C,YBL029W,MOH1,MRX3,YBR056W-A,YBR085C-A,ICS2,YCL048W-A,YCR016W,YCR087C-A,GPM2,RTK1,SNA4,UGX2,YDL177C,MRH1,ALT2,YDR132C,YDR186C,YDR249C,YDR262W,BSC2,PHM6,HEH2,YDR461C-A,SNA2,PXP1,UTR5,FMP52,HVG1,TDA2,YER079W,YER084W,COM2,YER137C,YER158C,TMT1,YGL088W,TOS8,YGL117W,ECL1,RTS3,RTA1,SPG1,YHL026C,YHR097C,ANS1,YIL002W-A,YIL024C,PRM5,RRT14,OM45,YIL161W,PRM10,YJL133C-A,TOH1,ACO2,MHO1,YJR056C,YJR061W,Y…
71554	cell wall organization or biogenesis	24 out of 544 genes, 4.4%	200 of 6338 genes, 3.2%	2.23144	PRS4,TIP1,SED1,KRE2,SPO73,ACT1,OSW7,BIG1,QDR1,YVH1,KRE9,CWP1,UTH1,KTR2,OSW2,CCW14,PUN1,ROT1,DFG5,RNT1,RHO2,YGP1,KRE1,KRE6
55086	nucleobase-containing small molecule metabolic process	24 out of 544 genes, 4.4%	201 of 6338 genes, 3.2%	2.31933	CDC19,ADE1,TPI1,HPT1,PHO8,SDT1,ADE5,7,PFK1,ENO1,TDH1,URA2,CAB3,GPM1,MTD1,CDD1,ADE13,ADE17,ADE4,ADH2,AAH1,ADE12,GPD2,STD1,ALD4
54	ribosomal subunit export from nucleus	8 out of 544 genes, 1.5%	46 of 6338 genes, 0.7%	2.54008	ECM1,SLX9,SDA1,RPF1,NOP9,RRS1,NOP53,TIF6
7124	pseudohyphal growth	11 out of 544 genes, 2.0%	74 of 6338 genes, 1.2%	2.72228	GPR1,NRG1,DIG2,DSE2,IME1,PHD1,DFG5,DIA1,MEP2,SLZ1,GPB1
42255	ribosome assembly	9 out of 544 genes, 1.7%	56 of 6338 genes, 0.9%	2.8217	MAK21,SSF1,RPF1,SQT1,YVH1,MRT4,SDO1,REX4,RSA1
51186	cofactor metabolic process	21 out of 544 genes, 3.9%	178 of 6338 genes, 2.8%	3.18281	CDC19,ACS1,TPI1,HEM1,PHO8,BUD16,NBP35,PFK1,ENO1,BIO2,TDH1,CAB3,GPM1,DRE2,MTD1,FAA4,ADH2,GPD2,ISU2,ALD4,ISU1
6974	cellular response to DNA damage stimulus	19 out of 544 genes, 3.5%	298 of 6338 genes, 4.7%	3.37787	RAD16,HSP30,NSE3,GLC7,MAG1,ACT1,RAD6,LIF1,YNG2,WSS1,REV7,SUB1,DDR48,FYV6,EAF7,MGS1,WTM2,RMI1,HRR25
6281	DNA repair	15 out of 544 genes, 2.8%	245 of 6338 genes, 3.9%	3.68125	RAD16,NSE3,MAG1,ACT1,RAD6,LIF1,YNG2,WSS1,REV7,SUB1,DDR48,FYV6,EAF7,MGS1,HRR25
6366	transcription from RNA polymerase II promoter	47 out of 544 genes, 8.6%	477 of 6338 genes, 7.5%	3.87989	ROX3,REG2,RPB5,SMP1,ADF1,UGA3,NRG1,NPL3,SPP41,DIG2,ACA1,DOT6,GLC7,SPT15,BUR6,RPH1,GAT1,PDR1,RAD6,RAI1,TFG2,STP2,RPC10,VHR1,MGA2,IME1,PHD1,KTI12,DAL80,BAS1,IFH1,TAF13,SUB1,MED11,GAT2,RNT1,EAF7,IZH2,CIN5,STD1,WTM2,YOR338W,SGF11,RLM1,CUP9,USV1,ROX1
6865	amino acid transport	7 out of 544 genes, 1.3%	42 of 6338 genes, 0.7%	4.02151	ATG22,CAN1,BTN2,HIP1,GAP1,AQR1,DIP5
23052	signaling	15 out of 544 genes, 2.8%	240 of 6338 genes, 3.8%	4.21455	ADF1,GPR1,MF(ALPHA)2,GPG1,LST7,YVH1,RCN1,RHO2,MDG1,RHO5,STD1,BAG7,LCB4,GPB1,RLM1
43934	sporulation	16 out of 544 genes, 2.9%	133 of 6338 genes, 2.1%	4.29174	PRB1,SPO73,GLC7,ACT1,OSW7,QDR1,YVH1,UBX6,CWP1,UBI4,OSW2,SUB1,SPS19,PDR16,YOR338W,SPO24
45333	cellular respiration	3 out of 544 genes, 0.6%	83 of 6338 genes, 1.3%	4.40999	YBR238C,PET20,CIT3
746	conjugation	6 out of 544 genes, 1.1%	124 of 6338 genes, 2%	4.46865	ADF1,RVS161,KIN82,MF(ALPHA)2,SSF1,MDG1
6873	cellular ion homeostasis	15 out of 544 genes, 2.8%	124 of 6338 genes, 2%	4.57249	CTH1,CCC2,SIT1,GLC7,PMC1,FRE6,SMF3,YLR126C,TIS11,IZH2,IZH4,ISU2,FRE3,ISU1,VMA11
51321	meiotic cell cycle	19 out of 544 genes, 3.5%	279 of 6338 genes, 4.4%	5.20377	SPO73,GLC7,ACT1,OSW7,RAD6,ZIP2,QDR1,YVH1,IME1,CWP1,UBI4,OSW2,SUB1,SLZ1,SPS19,PDR16,WTM2,YOR338W,HRR25
70925	organelle assembly	15 out of 544 genes, 2.8%	128 of 6338 genes, 2.0%	5.3068	ATG8,MAK21,ATG1,SSF1,RPF1,SQT1,YVH1,MRT4,YPT52,SDO1,DMA2,REX4,VPS21,RSA1,ATG41
51603	proteolysis involved in cellular protein catabolic process	17 out of 544 genes, 3.1%	249 of 6338 genes, 3.9%	5.94974	UBC4,RAD16,CDC34,SEM1,UBC8,UBC6,GLC7,RAD6,UBX6,CPS1,VPS24,UCC1,GID8,HLJ1,DMA2,ATG19,GPB1
48193	Golgi vesicle transport	12 out of 544 genes, 2.2%	190 of 6338 genes, 3%	5.9998	ATG8,AGE1,TRX2,SYS1,YPT52,VTI1,RSN1,PDR17,PEP12,VPS21,SNC2,HRR25
15931	nucleobase-containing compound transport	7 out of 544 genes, 1.3%	123 of 6338 genes, 1.9%	7.37282	SEM1,NPL3,YEA6,BUD13,GFD1,RIO2,NEW1
6354	DNA-templated transcription, elongation	5 out of 544 genes, 0.9%	96 of 6338 genes, 1.5%	8.12155	NPL3,RPH1,TFG2,RPA34,SUB1
55085	transmembrane transport	22 out of 544 genes, 4.0%	236 of 6338 genes, 3.7%	8.44021	FUR4,YMC2,CTP1,SUL1,ATG22,ADY2,FEN2,CCC2,YEA6,CAN1,SIT1,PMC1,ZRT1,PEX21,TNA1,QDR1,SRP21,THI7,PHO84,FET4,AQR1,MDH2
7031	peroxisome organization	3 out of 544 genes, 0.6%	70 of 6338 genes, 1.1%	8.50454	PEX21,MDH2,HRR25
61025	membrane fusion	9 out of 544 genes, 1.7%	75 of 6338 genes, 1.2%	8.59938	ATG8,GYP7,SEC9,TRX2,ENO1,YHR138C,VTI1,PBI2,SNC2
6353	DNA-templated transcription, termination	6 out of 544 genes, 1.1%	43 of 6338 genes, 0.7%	8.89658	NPL3,GLC7,RAD6,RAI1,SUB1,RNT1
18193	peptidyl-amino acid modification	10 out of 544 genes, 1.8%	150 of 6338 genes, 2.4%	8.97289	ACS1,KTI11,YPK3,ACT1,ZIP2,YNG2,WSS1,EAF7,HRR25,HPA2
16197	endosomal transport	6 out of 544 genes, 1.1%	102 of 6338 genes, 1.6%	9.84224	BTN2,SYS1,VPS24,YPT52,YPT6,VPS21
9451	RNA modification	16 out of 544 genes, 2.9%	170 of 6338 genes, 2.7%	9.91934	KTI11,TRM7,NHP2,RRP8,TYW3,NBP35,NOP10,BMT5,KTI12,CBF5,NOP56,SLZ1,ISU2,ISU1,HRR25,PUS1
8380	RNA splicing	14 out of 544 genes, 2.6%	144 of 6338 genes, 2.3%	10.1484	MUD1,PRP5,SLU7,CWC15,NPL3,BUD13,PRP21,ISY1,NTR2,YHC1,SPP2,SNU66,HSH49,SNT309
51169	nuclear transport	14 out of 544 genes, 2.6%	177 of 6338 genes, 2.8%	10.7091	ECM1,SEM1,NPL3,BUD13,SLX9,SDA1,RPF1,NOP9,GFD1,RIO2,RRS1,NOP53,NEW1,TIF6
51049	regulation of transport	5 out of 544 genes, 0.9%	88 of 6338 genes, 1.4%	10.7145	RAD6,ASK10,RIO2,CUP9,HRR25
9408	response to heat	8 out of 544 genes, 1.5%	70 of 6338 genes, 1.1%	10.8018	HSP26,UBC4,HSP30,UBC5,GLC7,BUR6,HSP12,CUR1
6397	mRNA processing	14 out of 544 genes, 2.6%	175 of 6338 genes, 2.8%	10.8663	MUD1,PRP5,SLU7,CWC15,NPL3,BUD13,PRP21,ISY1,NTR2,YHC1,SPP2,SNU66,HSH49,SNT309
70647	protein modification by small protein conjugation or removal	15 out of 544 genes, 2.8%	169 of 6338 genes, 2.7%	10.8871	UBC4,RAD16,CDC34,UBC5,SEM1,UBC8,UBC6,RAD6,ZIP2,UPF3,WSS1,UBI4,DMA2,GPB1,SGF11
6352	DNA-templated transcription, initiation	8 out of 544 genes, 1.5%	71 of 6338 genes, 1.1%	11.1325	ROX3,SPT15,BUR6,TFG2,RRN11,TAF13,SUB1,MED11
6091	generation of precursor metabolites and energy	13 out of 544 genes, 2.4%	153 of 6338 genes, 2.4%	11.74	CDC19,ACS1,YBR238C,TPI1,GLC7,PFK1,ENO1,PIG2,RGI2,TDH1,GPM1,PET20,CIT3
10324	membrane invagination	2 out of 544 genes, 0.4%	50 of 6338 genes, 0.8%	12.2346	ATG8,ATG1
6401	RNA catabolic process	11 out of 544 genes, 2.0%	132 of 6338 genes, 2.1%	12.6536	RRP43,CTH1,RAI1,UPF3,AIR1,MRT4,TIS11,RMP1,RNT1,MPP6,DCS2
51604	protein maturation	2 out of 544 genes, 0.4%	49 of 6338 genes, 0.8%	12.8529	MAP1,ATG19
910	cytokinesis	5 out of 544 genes, 0.9%	81 of 6338 genes, 1.3%	13.1689	BUD16,ACT1,BUD13,NOP15,DMA2
16570	histone modification	10 out of 544 genes, 1.8%	114 of 6338 genes, 1.8%	13.3168	ACS1,SEM1,GLC7,RPH1,ACT1,RAD6,YNG2,EAF7,SGF11,HPA2
6383	transcription from RNA polymerase III promoter	5 out of 544 genes, 0.9%	41 of 6338 genes, 0.6%	13.97	RPB5,SPT15,RPC10,SUB1,RPC40
8033	tRNA processing	9 out of 544 genes, 1.7%	106 of 6338 genes, 1.7%	14.0183	KTI11,TRM7,TYW3,NBP35,KTI12,ISU2,ISU1,HRR25,PUS1
6457	protein folding	7 out of 544 genes, 1.3%	95 of 6338 genes, 1.5%	14.3149	HSP26,CNS1,TSA2,ERJ5,BTN2,ROT1,CUR1
48284	organelle fusion	8 out of 544 genes, 1.5%	88 of 6338 genes, 1.4%	14.6812	GYP7,SEC9,TRX2,ENO1,YHR138C,VTI1,PBI2,SNC2
6897	endocytosis	8 out of 544 genes, 1.5%	97 of 6338 genes, 1.5%	14.7211	SDS24,RVS161,FEN2,ACT1,YPT52,VPS21,SNC2,HRR25
1403	invasive growth in response to glucose limitation	6 out of 544 genes, 1.1%	59 of 6338 genes, 0.9%	15.7161	GPR1,NRG1,DIG2,GPG1,DIA1,GPB1
8643	carbohydrate transport	1 out of 544 genes, 0.2%	33 of 6338 genes, 0.5%	16.1554	ASK10
6486	protein glycosylation	4 out of 544 genes, 0.7%	62 of 6338 genes, 1%	16.82	KRE2,MNN4,KTR2,ROT1
6360	transcription from RNA polymerase I promoter	6 out of 544 genes, 1.1%	66 of 6338 genes, 1.0%	16.9234	RPB5,SPT15,RPC10,RPA34,RRN11,RPC40
16050	vesicle organization	6 out of 544 genes, 1.1%	72 of 6338 genes, 1.1%	16.9873	SEC9,SYS1,VPS24,VTI1,ATG19,SNC2
43543	protein acylation	5 out of 544 genes, 0.9%	66 of 6338 genes, 1.0%	17.7084	ACS1,ACT1,YNG2,EAF7,HPA2
6869	lipid transport	5 out of 544 genes, 0.9%	65 of 6338 genes, 1.0%	17.9053	KIN82,FAA4,PDR16,PDR17,PXA1
7114	cell budding	4 out of 544 genes, 0.7%	58 of 6338 genes, 0.9%	18.331	GLC7,ACT1,ROT1,DFG5
48308	organelle inheritance	4 out of 544 genes, 0.7%	58 of 6338 genes, 0.9%	18.331	ACT1,TRX2,PEP12,VPS21
6470	protein dephosphorylation	3 out of 544 genes, 0.6%	49 of 6338 genes, 0.8%	18.9871	PHO8,GLC7,YVH1
42594	response to starvation	4 out of 544 genes, 0.7%	56 of 6338 genes, 0.9%	18.9945	RVS161,PRB1,VHR1,DCS2
902	cell morphogenesis	1 out of 544 genes, 0.2%	29 of 6338 genes, 0.5%	20.351	GLC7
6766	vitamin metabolic process	4 out of 544 genes, 0.7%	43 of 6338 genes, 0.7%	20.5036	THI4,BIO2,SNZ1,THI20
6887	exocytosis	4 out of 544 genes, 0.7%	48 of 6338 genes, 0.8%	20.6425	SEM1,ACT1,SEC9,SNC2
43144	snoRNA processing	3 out of 544 genes, 0.6%	45 of 6338 genes, 0.7%	20.9533	RRP43,CBF5,RNT1
9311	oligosaccharide metabolic process	3 out of 544 genes, 0.6%	31 of 6338 genes, 0.5%	23.3272	NTH2,KRE2,ATH1
6413	translational initiation	0 out of 544 genes, 0%	61 of 6338 genes, 1%	--	none
32543	mitochondrial translation	0 out of 544 genes, 0%	167 of 6338 genes, 2.6%	--	none
8213	protein alkylation	0 out of 544 genes, 0%	50 of 6338 genes, 0.8%	--	none
6414	translational elongation	0 out of 544 genes, 0%	333 of 6338 genes, 5.3%	--	none
6418	tRNA aminoacylation for protein translation	0 out of 544 genes, 0%	36 of 6338 genes, 0.6%	--	none
6997	nucleus organization	0 out of 544 genes, 0%	66 of 6338 genes, 1.0%	--	none
6497	protein lipidation	0 out of 544 genes, 0%	45 of 6338 genes, 0.7%	--	none
other	other	33 out of 544 genes, 6.1%	--	--	RCR1,YBR139W,MCH1,GDH2,ARO3,SPI1,CLG1,LSO2,MGA1,ARN1,PCL5,RTC3,OYE2,CRG1,SGN1,DAL4,DAL2,DAL3,ECM4,SRL3,SHM2,CTS1,ATG39,PAI3,HOR7,CHS1,FRE4,MCH4,YSP3,ETT1,YOR283W,YPL088W,OYE3
Component
GOID	GO term	Frequency	Genome Frequency	Corrected hypergeometric test (p-val)	Gene(s)
5730	nucleolus	74 out of 544 genes, 13.6%	329 of 6338 genes, 5.2%	2.75015e-14	MAK16,ECM1,YBL028C,RPB5,ENP1,YCR016W,RRP43,YCR087C-A,DBP10,NHP2,NOP6,RRP8,FCF1,ESF1,PUF6,NOP16,UTP7,GLC7,SPT15,LOC1,CGR1,DBP3,ROK1,UPF3,SLX9,NOP7,RRP3,SSF1,NOP10,RPF1,RPC10,IMP3,AIR1,BMT5,RRT14,NOP9,HCA4,RPA34,MRT4,RRP14,UTP11,EBP2,UTP30,NOC3,RLP24,FCF2,FYV7,RMP1,CBF5,NOP56,IFH1,RRN11,BUD22,ERB1,ECM16,RNT1,TMA23,HAS1,RLP7,IMP4,NOP15,KRI1,REX4,BUD21,PNO1,RRP36,RRS1,NOP4,NOP53,NIP7,BMS1,TIF6,RPC40,…
5886	plasma membrane	58 out of 544 genes, 10.7%	392 of 6338 genes, 6.2%	0.000224229	CDC19,FUR4,SUL1,ADY2,HSP30,FEN2,GPR1,MRH1,TPI1,PMP3,GIC2,FRD1,CAN1,HSP12,ZRT1,SEC9,VHT1,MEP1,TPO2,HIP1,RTA1,ENO1,TNA1,DUR3,ARN1,YHK8,QDR1,TDH1,TOH1,GAP1,SHM2,THI7,INA1,PUN1,PHO84,PLB1,ADE17,DFG5,HOR7,FET4,AQR1,MEP2,MDG1,RHO5,CHS1,PDR16,FRE4,IZH2,STD1,PIN2,LCB4,MCH5,GPB1,FRE3,HRR25,DIP5,MEP3,KRE6
5694	chromosome	14 out of 544 genes, 2.6%	382 of 6338 genes, 6.0%	0.00109247	NSE3,DOT6,GLC7,ACT1,RAD6,LIF1,TOS8,ZIP2,REV7,IFH1,IES2,RMI1,HRR25,ROX1
5634	nucleus	220 out of 544 genes, 40.4%	2207 of 6338 genes, 34.8%	0.0145452	MAK16,ECM1,ADE1,YBL028C,YBL029W,KTI11,ROX3,HSP26,YBR085C-A,RAD16,MUD1,RPB5,SMP1,PRP5,GPX2,ENP1,ADF1,YCR016W,RRP43,YCR087C-A,DBP10,UGA3,NHP2,NOP6,ARO3,NRG1,CDC34,MAK21,RRP8,SLU7,ALT2,YDR132C,CTH1,CWC15,NSE3,FCF1,SEM1,ESF1,HPT1,NPL3,HEH2,SPP41,DIG2,PUF6,NOP16,ACA1,GPP2,YER079W,UTP7,DOT6,NSA2,LCP5,GLC7,MAG1,SPT15,BUR6,RPH1,HSP12,GAT1,ACT1,LOC1,PDR1,CGR1,RAD6,DBP3,LIF1,NBP35,TOS8,ROK1,BUD13,RAI1,ZIP2…
5856	cytoskeleton	6 out of 544 genes, 1.1%	200 of 6338 genes, 3.2%	0.0184354	RVS161,GLC7,ACT1,DMA2,HRR25,PIN3
5773	vacuole	67 out of 544 genes, 12.3%	564 of 6338 genes, 8.9%	0.0254896	ATG8,GRX7,FUR4,YBR139W,ATG22,YCL048W-A,FEN2,MCH1,SNA4,YDR262W,PHM6,PHO8,KRE2,AGE1,SNA2,PMP2,PRB1,SIT1,HSP12,PMC1,MF(ALPHA)2,ATG1,LST7,TPO2,BTN2,TRX2,ENO1,TNA1,VMR1,ARN1,ANS1,DSE2,DAL4,NCA3,CPS1,KRE9,VPS24,CWP1,YPT52,GAP1,FRE6,SMF3,YLR046C,CTS1,INA1,PHO84,ICY1,VTI1,HOR7,RSN1,FET4,PBI2,AQR1,RHO5,PDR17,KRE1,IZH2,IZH4,MCH4,PEP12,VPS21,PIN2,SNC2,FRE3,VMA11,DIP5,ATH1
5840	ribosome	17 out of 544 genes, 3.1%	358 of 6338 genes, 5.6%	0.0364721	YBL028C,SED1,YDR186C,PUF6,FRD1,VMR1,SQT1,ALB1,RRP14,ESL2,MAP1,YET2,TMA23,YMR295C,MPP6,TMA16,GDE1
12505	endomembrane system	64 out of 544 genes, 11.8%	977 of 6338 genes, 15.4%	0.0492941	RCR1,GRX7,HSP30,MRH1,CCC2,HEH2,KRE2,AGE1,CAN1,SIT1,FMP52,HVG1,UBC6,HSP12,OSW7,ERJ5,ZRT1,MEP1,BTN2,HIP1,RTA1,SPG1,DUR3,ARN1,BIG1,WSS1,MGA2,SYS1,PRM10,TOH1,VPS24,ANR2,YPT52,NTR2,GAP1,YSR3,KTR2,YPT6,CTS1,ATG39,PUN1,PHO84,PLB1,YET2,HLJ1,VTI1,ROT1,DFG5,HOR7,GFD1,RSN1,HAS1,KTR5,RHO5,PDR17,YSP3,PEP12,IRC23,VPS21,LCB4,SNC2,HRR25,MEP3,KRE6
5739	mitochondrion	84 out of 544 genes, 15.4%	1175 of 6338 genes, 18.5%	0.157414	GCV3,ACS1,MRX3,NTH2,HSP26,YMC2,YBR238C,GPX2,CTP1,CHA1,CIT2,ADY2,TRX3,GDH2,GCV1,MRH1,ARO3,TPI1,SED1,YDR132C,HEM1,CTA1,YEA6,FRD1,CAN1,FMP52,CEM1,ARG5,6,ALD5,ZIP2,CLD1,SPG1,PFK1,ENO1,TNA1,BIO2,VMR1,OYE2,BAT1,LYS12,OM45,REV7,TDH1,URA2,YJL133C-A,TOH1,ACO2,SFC1,YJR111C,MAE1,OAC1,GPM1,UTH1,FMP46,CCP1,DRE2,PUT1,CIS1,CCW14,CAT2,CCS1,ARG7,ILV2,ECM16,GCV2,CMC4,YHM2,NCE103,YNL195C,MRX7,GPD2,GLO4,VPS21,CRC1,L…
5938	cell cortex	5 out of 544 genes, 0.9%	146 of 6338 genes, 2.3%	0.167587	RVS161,ACT1,DMA2,LCB4,PIN3
5737	cytoplasm	351 out of 544 genes, 64.5%	4301 of 6338 genes, 67.9%	0.192836	CDC19,GCV3,ACS1,ADE1,YBL028C,YBL029W,PRS4,KTI11,ATG8,MRX3,NTH2,RCR1,UGA2,GRX7,FUR4,YPK3,REG2,TRM7,TIP1,HSP26,YBR085C-A,YMC2,LYS2,YBR139W,CNS1,SMP1,SDS24,YBR238C,GPX2,ENP1,CTP1,LEU2,SRO9,ATG22,YCL048W-A,CHA1,CIT2,RVS161,ADY2,HSP30,FEN2,RRP43,TRX3,GPM2,MCH1,SNA4,GDH2,GYP7,GCV1,MRH1,ARO3,TPI1,CDC34,SED1,ALT2,YDR132C,YDR186C,HEM1,CTA1,YDR262W,CCC2,PHM6,NSE3,SEM1,ARO10,HPT1,NPL3,TSA2,SPP41,PHO8,KRE2,P…
5783	endoplasmic reticulum	40 out of 544 genes, 7.4%	615 of 6338 genes, 9.7%	0.207356	RCR1,HSP30,MRH1,CAN1,FMP52,HVG1,UBC6,OSW7,ERJ5,ZRT1,MEP1,HIP1,RTA1,SPG1,DUR3,BIG1,MGA2,PRM10,TOH1,ANR2,NTR2,GAP1,YSR3,CTS1,ATG39,PUN1,PHO84,PLB1,YET2,HLJ1,ROT1,DFG5,HOR7,RSN1,KTR5,YSP3,IRC23,LCB4,MEP3,KRE6
5740	mitochondrial envelope	20 out of 544 genes, 3.7%	355 of 6338 genes, 5.6%	0.208081	MRX3,YBR238C,GPX2,CTP1,YEA6,FMP52,CLD1,OM45,SFC1,OAC1,GPM1,UTH1,CCP1,DRE2,CCS1,CMC4,YHM2,NCE103,VPS21,CRC1
5933	cellular bud	12 out of 544 genes, 2.2%	240 of 6338 genes, 3.8%	0.258266	GIC2,GLC7,ACT1,SEC9,CTS1,PUN1,YMR295C,DMA2,PIN2,SNC2,HRR25,KRE6
30427	site of polarized growth	14 out of 544 genes, 2.6%	261 of 6338 genes, 4.1%	0.330156	RVS161,GIC2,TDA2,GLC7,ACT1,SEC9,SHM2,CTS1,YMR295C,DMA2,PIN2,CAR1,HRR25,KRE6
16020	membrane	129 out of 544 genes, 23.7%	1618 of 6338 genes, 25.5%	0.571569	CDC19,ACS1,ATG8,MRX3,RCR1,GRX7,FUR4,YMC2,YBR238C,GPX2,CTP1,SUL1,ATG22,RVS161,ADY2,HSP30,FEN2,GPR1,MCH1,SNA4,MRH1,TPI1,CCC2,PMP3,GIC2,PHO8,KRE2,SNA2,YEA6,PMP2,FRD1,CAN1,SIT1,FMP52,HVG1,SPO73,UBC6,HSP12,PMC1,ATG1,ZRT1,SEC9,LST7,VHT1,CLD1,MEP1,TPO2,HIP1,RTA1,ENO1,TNA1,DUR3,VMR1,ARN1,YHK8,BIG1,PRM5,QDR1,OM45,DAL4,DAL3,MGA2,SYS1,TDH1,PRM10,URA2,TOH1,SFC1,VPS24,CWP1,OAC1,MNN4,YPT52,GAP1,UTH1,YSR3,FRE6,…
5815	microtubule organizing center	2 out of 544 genes, 0.4%	73 of 6338 genes, 1.2%	0.748951	GLC7,HRR25
5777	peroxisome	10 out of 544 genes, 1.8%	75 of 6338 genes, 1.2%	1.20696	CIT2,CTA1,PXP1,POX1,PEX21,FOX2,CAT2,MLS1,SPS19,PXA1
5575	cellular component unknown	47 out of 544 genes, 8.6%	589 of 6338 genes, 9.3%	1.24992	MOH1,YBR056W-A,ICS2,KIN82,RTK1,UGX2,YDL177C,YDR249C,INM2,YDR461C-A,BUD16,UTR5,HIS1,YER084W,COM2,YER137C,YER158C,TYW3,YGL088W,YGL117W,GPG1,SDT1,ECL1,YHR138C,CRG1,YIL002W-A,YIL024C,DAL2,YJR061W,YKL050C,YLR053C,YLR146W-A,BOP2,YLR307C-A,ADE13,YLR361C-A,YLR407W,SPG4,YMR181C,SPG5,BAG7,YOR338W,LEE1,YPL088W,OYE3,ATG41,YPR145C-A
5794	Golgi apparatus	13 out of 544 genes, 2.4%	199 of 6338 genes, 3.1%	1.46164	GRX7,CCC2,KRE2,AGE1,SYS1,KTR2,YPT6,VTI1,KTR5,PEP12,LCB4,SNC2,HRR25
5576	extracellular region	5 out of 544 genes, 0.9%	31 of 6338 genes, 0.5%	1.76351	MF(ALPHA)2,DSE2,KRE9,CTS1,YGP1
5618	cell wall	11 out of 544 genes, 2.0%	98 of 6338 genes, 1.5%	1.95829	TIP1,SED1,SPI1,DSE2,TDH1,TOH1,CWP1,CTS1,CCW14,KRE1,ATH1
16023	cytoplasmic, membrane-bounded vesicle	7 out of 544 genes, 1.3%	105 of 6338 genes, 1.7%	2.72964	CCC2,SIT1,ARN1,GAP1,CHS1,SNC2,KRE6
other	other	8 out of 544 genes, 1.5%	--	--	UBC4,UBC5,BSC2,CLG1,YHL026C,UCC1,YLR326W,SNZ1
Note: Only S. uvarum genes that have S. cerevisiae homologs are included in this GO-term analysis, but the background gene set was not adjusted. GO-term analysis was conducted using SGD GO-Slim Mapper (http://www.yeastgenome.org/cgi-bin/GO/goSlimMapper.pl). Hypergeometric test was corrected by multipling by the number of terms in each category (e.g. process).

## Sheet: GOslim_4h_DnMut
GO-Slim Mapper results for genes that are two-folds down-regulated in S. uvarum gal80∆ gal80b∆ relative to wild-type at FDR=0.05 during TGA
Function
GOID	GO term	Frequency	Genome Frequency	Corrected hypergeometric test (p-val)	Gene(s)
3735	structural constituent of ribosome	40 out of 361 genes, 11.1%	231 of 6338 genes, 3.6%	4.08708e-09	MRPL36,MRPS9,MRPS5,MRPL37,MRPL32,IMG1,MRX14,MRPL1,MRPL7,MHR1,MRPL35,MRPS28,MRP1,MRP20,MRPL28,MNP1,MRP13,MRPS35,MRPL9,MRP4,RSM25,MRPL8,MRPL49,RSM26,RSM7,MRPL31,MRPL38,MRPL20,MRPL15,MRPL4,MRPL3,MRPL24,NAM9,MRPL22,MRPL19,MRPL10,MRPS12,RSM19,MRPL23,RTC6
3723	RNA binding	14 out of 361 genes, 3.9%	844 of 6338 genes, 13.3%	1.76471e-08	PBP2,CPR1,MRH4,RMD9,MRF1,PET54,RIM4,MDH1,YLL032C,MEF1,NAM2,IFM1,TUF1,MSC6
5198	structural molecule activity	49 out of 361 genes, 13.6%	350 of 6338 genes, 5.5%	6.12776e-08	MRPL36,MRPS9,MRPS5,MRPL37,MRPL32,IMG1,MRX14,MRPL1,FIN1,MRPL7,MHR1,MRPL35,MRPS28,MRP1,SPC110,MRP20,MRPL28,MNP1,MRP13,MRPS35,MRPL9,MRP4,RSM25,MRPL8,MRPL49,CIS3,RSM26,RSM7,MRPL31,MRPL38,MRPL20,STU2,CCW12,TUB4,MRPL15,MRPL4,MRPL3,MRPL24,SPC98,NAM9,MRPL22,MRPL19,MRPL10,MRPS12,RSM19,MRPL23,NUD1,RTC6,BBP1
3674	molecular function unknown	66 out of 361 genes, 18.3%	1849 of 6338 genes, 29.2%	1.53853e-05	DEP1,ATS1,AIM1,SEF1,YCR061W,YDL180W,YDL183C,HBT1,YDR061W,UBX5,SDH7,GTT3,RIP1,YFR006W,SCS3,MTO1,YGR021W,MTL1,IMO32,BUD9,PHB2,YGR266W,SAM35,COX23,RTT107,KEL1,MDM31,AIM18,FMC1,AXL2,COA1,YIR035C,MPS3,AIM24,ADD66,YKR075C,YLR049C,RAX2,UPS2,MMR1,QRI5,MCP2,YLR281C,TMA10,SRC1,SUR7,AIM33,AIM36,SPT21,YNL046W,NIS1,MIC27,YNL144C,YNL193W,ATG2,PRM1,TOS6,YNR040W,AIM39,NBA1,DSC2,SRL1,DSE3,SFG1,AIM44,PBI1
8092	cytoskeletal protein binding	10 out of 361 genes, 2.8%	67 of 6338 genes, 1.1%	0.132677	YIH1,FIN1,NUM1,YSC84,STU2,HOF1,AIP1,TPM1,ASE1,IQG1
16301	kinase activity	19 out of 361 genes, 5.3%	195 of 6338 genes, 3.1%	0.330121	KCC4,DUN1,KIN1,PKH1,GIN4,ADK2,HXK1,ALK1,SIP2,DBF2,SWE1,YNK1,HSL1,CKI1,CDC5,PIK1,MCK1,FRK1,TPK2
16491	oxidoreductase activity	25 out of 361 genes, 6.9%	281 of 6338 genes, 4.4%	0.3329	BDH1,ETR1,SCO1,MET8,DLD1,YPR1,RNR1,COX15,QCR6,ERG26,COQ6,PUT2,KGD1,RNR2,MDH1,SDH1,MIA40,TRX1,ERG27,NDI1,COX5A,ZWF1,MPD2,ALD6,YAH1
16853	isomerase activity	8 out of 361 genes, 2.2%	59 of 6338 genes, 0.9%	0.531632	CPR1,PMI40,INO1,MIA40,YMR099C,ERG2,CPR8,MPD2
3677	DNA binding	31 out of 361 genes, 8.6%	389 of 6338 genes, 6.1%	0.566851	HAP3,MCM7,HCM1,CDC53,CDC13,MSH6,SWI5,HTA1,MHR1,SMC1,IOC3,RME1,FKH1,CDC6,SLD2,ASH1,IOC2,CDC45,ACE2,HSP60,ACO1,YOX1,CAT8,HHF2,PMS1,HAP5,HHO1,GAL4,MCM4,CTF4,DPB2
19843	rRNA binding	1 out of 361 genes, 0.3%	104 of 6338 genes, 1.6%	0.599608	MRH4
16887	ATPase activity	22 out of 361 genes, 6.1%	263 of 6338 genes, 4.1%	0.801642	PIM1,MCM7,MSH6,ATP5,BCS1,PDR15,PAC11,CIN8,SMC1,IOC3,MRH4,SMC3,CDC6,SSC1,ATP7,STE6,IOC2,HSP60,PMS1,ATP19,MCM4,ARP7
3682	chromatin binding	11 out of 361 genes, 3.0%	107 of 6338 genes, 1.7%	0.980705	MCM7,MCD1,SIR2,IOC3,IRR1,FKH1,CDC6,IOC2,CDC45,TOS4,CTF4
22857	transmembrane transporter activity	24 out of 361 genes, 6.6%	319 of 6338 genes, 5.0%	1.47269	PET9,HEM25,BAP3,ATP5,BCS1,PDR15,ITR1,COX15,OXA1,QCR6,MUP1,TOM71,YIA6,ATP7,STE6,FPS1,TOM40,SAM50,COX5A,TOM22,VNX1,ATP19,AMF1,ANT1
30234	enzyme regulator activity	18 out of 361 genes, 5%	232 of 6338 genes, 3.7%	1.85063	YIH1,SED4,INH1,CDC13,MDJ1,CLB6,FAR1,SSC1,GAL80,SML1,CDC5,CLN1,PCL1,MCK1,SIL1,CIP1,CLN2,CLB2
8565	protein transporter activity	6 out of 361 genes, 1.7%	51 of 6338 genes, 0.8%	1.921	BCS1,OXA1,TOM71,TOM40,SAM50,TOM22
16874	ligase activity	9 out of 361 genes, 2.5%	97 of 6338 genes, 1.5%	2.26338	PET112,CDC9,LSC2,LIP2,NAM2,MSK1,LSC1,MSY1,MSD1
16787	hydrolase activity	52 out of 361 genes, 14.4%	870 of 6338 genes, 13.7%	2.51693	PIM1,MCM7,ROT2,SIR2,EHD3,MSH6,ATP5,BCS1,PDR15,PAC11,CIN8,ISC1,ICP55,SMC1,IOC3,DUG1,MRH4,SAP4,PCP1,MYO1,PTC7,SOL3,SMC3,CDC6,POL31,SSC1,ATP7,STE6,DYN1,DNM1,IOC2,RNH203,HSP60,GUF1,DSS1,LAP2,RNH201,PMS1,RAS2,INP52,EGT2,DSE4,IFM1,ATP19,HST3,TUF1,HST2,YDC1,HOS3,KIP2,MCM4,ARP7
4518	nuclease activity	4 out of 361 genes, 1.1%	137 of 6338 genes, 2.2%	2.62389	POL31,RNH203,DSS1,RNH201
16740	transferase activity	49 out of 361 genes, 13.6%	831 of 6338 genes, 13.1%	2.67843	FMT1,COQ1,CHS2,KCC4,SLM3,DUN1,QRI1,CDC53,CRD1,KIN1,PKH1,SAM2,GIN4,HPA3,CHO1,ADK2,HXK1,ALK1,SIP2,DBF2,CHO2,PMT6,ERG9,SWE1,ELO1,POL31,OPI3,RAM2,YNK1,HSL1,GLG1,CKI1,SAM1,MET17,TAL1,COQ5,ERG13,CDC5,POL1,PIK1,MCK1,ABZ1,COQ2,MRM1,ERG10,FRK1,COX10,TPK2,DPB2
3924	GTPase activity	6 out of 361 genes, 1.7%	63 of 6338 genes, 1%	3.60583	CDC6,DNM1,GUF1,RAS2,IFM1,TUF1
16779	nucleotidyltransferase activity	4 out of 361 genes, 1.1%	121 of 6338 genes, 1.9%	4.09343	QRI1,POL31,POL1,DPB2
8233	peptidase activity	5 out of 361 genes, 1.4%	138 of 6338 genes, 2.2%	4.16929	PIM1,ICP55,DUG1,PCP1,LAP2
3729	mRNA binding	7 out of 361 genes, 1.9%	172 of 6338 genes, 2.7%	4.1856	PBP2,CPR1,RMD9,MDH1,YLL032C,NAM2,MSC6
1071	nucleic acid binding transcription factor activity	11 out of 361 genes, 3.0%	163 of 6338 genes, 2.6%	4.68932	HAP3,HCM1,SWI5,RME1,FKH1,ASH1,ACE2,RRN5,CAT8,HAP5,GAL4
16829	lyase activity	7 out of 361 genes, 1.9%	90 of 6338 genes, 1.4%	4.9399	CYC3,MET8,CYT2,MET17,ACO1,PSD1,FUM1
16757	transferase activity, transferring glycosyl groups	3 out of 361 genes, 0.8%	96 of 6338 genes, 1.5%	4.94812	CHS2,PMT6,GLG1
16791	phosphatase activity	3 out of 361 genes, 0.8%	94 of 6338 genes, 1.5%	5.22403	SAP4,PTC7,INP52
43167	ion binding	11 out of 361 genes, 3.0%	183 of 6338 genes, 2.9%	5.40853	SCO1,MCM7,KCC4,MSH6,CDC6,BUD4,SDH1,COX17,PMS1,RAS2,SEC2
8135	translation factor activity, RNA binding	4 out of 361 genes, 1.1%	43 of 6338 genes, 0.7%	5.81497	MRF1,MEF1,IFM1,TUF1
30674	protein binding, bridging	5 out of 361 genes, 1.4%	61 of 6338 genes, 1%	5.90051	TMA17,CDC53,ERG28,ERV29,TIM44
4386	helicase activity	3 out of 361 genes, 0.8%	86 of 6338 genes, 1.4%	6.39429	MCM7,MRH4,MCM4
16798	hydrolase activity, acting on glycosyl bonds	4 out of 361 genes, 1.1%	47 of 6338 genes, 0.7%	6.65365	ROT2,EGT2,DSE4,YDC1
988	transcription factor activity, protein binding	6 out of 361 genes, 1.7%	124 of 6338 genes, 2%	6.67196	SWI5,YOX1,NRM1,WTM1,NDD1,GAL4
8289	lipid binding	5 out of 361 genes, 1.4%	101 of 6338 genes, 1.6%	7.54513	KCC4,PIL1,PRY2,SEC2,TCB1
8168	methyltransferase activity	4 out of 361 genes, 1.1%	90 of 6338 genes, 1.4%	7.66308	CHO2,OPI3,COQ5,MRM1
5085	guanyl-nucleotide exchange factor activity	1 out of 361 genes, 0.3%	46 of 6338 genes, 0.7%	8.21559	SEC2
8134	transcription factor binding	4 out of 361 genes, 1.1%	69 of 6338 genes, 1.1%	8.89953	SUT1,GAL80,NRM1,GAL4
51082	unfolded protein binding	4 out of 361 genes, 1.1%	70 of 6338 genes, 1.1%	8.90138	MDJ1,SHY1,HSP60,ATP11
19899	enzyme binding	3 out of 361 genes, 0.8%	66 of 6338 genes, 1.0%	9.27952	STF1,PDS1,CSR2
32182	ubiquitin-like protein binding	3 out of 361 genes, 0.8%	43 of 6338 genes, 0.7%	9.64506	STP22,MDV1,DOA1
42393	histone binding	0 out of 361 genes, 0%	41 of 6338 genes, 0.6%	--	none
4871	signal transducer activity	0 out of 361 genes, 0%	38 of 6338 genes, 0.6%	--	none
30533	triplet codon-amino acid adaptor activity	0 out of 361 genes, 0%	299 of 6338 genes, 4.7%	--	none
30555	RNA modification guide activity	0 out of 361 genes, 0%	71 of 6338 genes, 1.1%	--	none
other	other	13 out of 361 genes, 3.6%	--	--	CBP6,OM14,TAH1,MFA1,MZM1,BET1,MAM33,ATP12,CYC1,ACP1,LAM6,ZIM17,PET494
Process
GOID	GO term	Frequency	Genome Frequency	Corrected hypergeometric test (p-val)	Gene(s)
7005	mitochondrion organization	96 out of 361 genes, 26.6%	420 of 6338 genes, 6.6%	1.77765e-33	PET112,CBP6,MRPL36,MRPS9,OM14,MRPS5,MRPL37,MRPL32,IMG1,HCM1,SLM3,CRD1,MRX14,MRPL1,NUM1,MRPL7,MHR1,MRPL35,MRPS28,MRP1,BCS1,MRP20,MRPL28,MZM1,SDH7,OXA1,MDJ1,MNP1,MRF1,MTO1,MRP13,PCP1,SHY1,MRPS35,MRPL9,PET54,PHB2,MRP4,SAM35,COX23,TOM71,MDM31,TIM44,MAM33,RSM25,FMC1,COA1,MRPL8,MRPL49,MDV1,ATP12,SSC1,AIM24,RSM26,RSM7,MRPL31,MRPL38,MIA40,MRPL20,DNM1,COX17,MEF1,UPS2,MMR1,MCP2,HSP60,ACO1,MRPL15,NAM2,MRPL4…
32543	mitochondrial translation	53 out of 361 genes, 14.7%	167 of 6338 genes, 2.6%	1.06834e-24	PET112,CBP6,MRPL36,MRPS9,MRPS5,MRPL37,MRPL32,IMG1,MRX14,MRPL1,MRPL7,MHR1,MRPL35,MRPS28,MRP1,MRP20,MRPL28,MNP1,MRF1,MRP13,MRPS35,MRPL9,PET54,MRP4,MAM33,RSM25,MRPL8,MRPL49,RSM26,RSM7,MRPL31,MRPL38,MRPL20,MEF1,MRPL15,NAM2,MRPL4,MRPL3,MRPL24,MSK1,NAM9,MRPL22,MRPL19,MRPL10,MRPS12,RSM19,PET494,IFM1,MRPL23,TUF1,MSY1,MSD1,RTC6
278	mitotic cell cycle	51 out of 361 genes, 14.1%	319 of 6338 genes, 5.0%	4.61571e-10	KCC4,MCD1,CDC53,CDC9,PDS1,FIN1,SWI5,SPC110,PAC11,GIN4,CIN8,SMC1,ALK1,SAP4,BUD9,RME1,CLB6,KEL1,IRR1,FKH1,AXL2,MPS3,SMC3,SWE1,CDC6,BUD4,HSL1,SLD2,ASH1,DYN1,STU2,RAX2,ACE2,TUB4,YOX1,SRC1,CDC5,HOF1,NIS1,SPC98,MCK1,NRM1,ASE1,SFG1,NDD1,NUD1,CIP1,HOS3,AIM44,CLB2,CTF4
45333	cellular respiration	19 out of 361 genes, 5.3%	83 of 6338 genes, 1.3%	1.03589e-05	HAP3,PET9,ETR1,RIP1,QCR6,RMD9,LSC2,MAM33,KGD1,CYC1,MDH1,SDH1,ACO1,COQ5,NDI1,COX5A,LSC1,HAP5,FUM1
6364	rRNA processing	1 out of 361 genes, 0.3%	311 of 6338 genes, 4.9%	1.49246e-05	MRM1
6414	translational elongation	2 out of 361 genes, 0.6%	333 of 6338 genes, 5.3%	4.35253e-05	MEF1,TUF1
70271	protein complex biogenesis	41 out of 361 genes, 11.4%	329 of 6338 genes, 5.2%	7.6333e-05	CYC3,PIM1,SCO1,CBP6,KCC4,SED4,TMA17,SPC110,BCS1,MZM1,GIN4,SDH7,CIN8,OXA1,SIP2,SHY1,PET54,SAM35,COX23,FMC1,COA1,MPS3,ATP12,CYT2,SLD2,ADD66,DNM1,COX17,STU2,TUB4,HSP60,CDC5,AIP1,SAM50,SPC98,ATP11,PET494,ATP19,ASE1,KIP2,BBP1
8150	biological process unknown	30 out of 361 genes, 8.3%	1049 of 6338 genes, 16.6%	0.000125747	AIM1,SEF1,YDL180W,EHD3,YDR061W,GTT3,YFR006W,YGR021W,IMO32,YGR266W,AIM18,YIR035C,YKR075C,YLL032C,YLR049C,YLR281C,TMA10,AIM33,AIM36,YNL046W,YNL144C,YNL193W,TOS6,CPR8,YNR040W,AIM39,NBA1,DSC2,DSE3,PBI1
7010	cytoskeleton organization	30 out of 361 genes, 8.3%	237 of 6338 genes, 3.7%	0.00166073	ATS1,KCC4,HCM1,FIN1,NUM1,SPC110,PAC11,GIN4,CIN8,YSC84,MYO1,KEL1,MPS3,SWE1,BUD4,DYN1,STU2,TUB4,CDC5,HOF1,AIP1,TPM1,SPC98,PCL1,ASE1,NUD1,KIP2,IQG1,BBP1,CLB2
6260	DNA replication	22 out of 361 genes, 6.1%	150 of 6338 genes, 2.4%	0.00239815	DEP1,MCM7,MCD1,SIR2,DUN1,CDC9,CDC13,MSH6,MHR1,CLB6,RIM4,FKH1,CDC6,POL31,SLD2,CDC45,RNH203,RNH201,POL1,MCM4,CTF4,DPB2
6091	generation of precursor metabolites and energy	21 out of 361 genes, 5.8%	153 of 6338 genes, 2.4%	0.00927674	HAP3,PET9,ETR1,RIP1,QCR6,HXK1,RMD9,LSC2,MAM33,KGD1,CYC1,MDH1,SDH1,GLG1,ACO1,COQ5,NDI1,COX5A,LSC1,HAP5,FUM1
48285	organelle fission	32 out of 361 genes, 8.9%	297 of 6338 genes, 4.7%	0.0179324	MCD1,MSH6,PDS1,FIN1,SWI5,NUM1,CPR1,SPC110,CIN8,SMC1,ALK1,RME1,DBF2,RIM4,KEL1,IRR1,MPS3,SMC3,MDV1,SWE1,DYN1,DNM1,SRC1,CDC5,NIS1,PMS1,MCK1,ASE1,MSC6,NUD1,CLB2,CTF4
2181	cytoplasmic translation	1 out of 361 genes, 0.3%	179 of 6338 genes, 2.8%	0.0266161	TUB4
51169	nuclear transport	1 out of 361 genes, 0.3%	177 of 6338 genes, 2.8%	0.029687	WTM1
6629	lipid metabolic process	29 out of 361 genes, 8.0%	286 of 6338 genes, 4.5%	0.0848003	DEP1,ETR1,CRD1,ISC1,CHO1,ERG28,ERG26,SCS3,CHO2,ERG9,MDM31,SWE1,ELO1,OPI3,ACP1,ERG27,CKI1,UPS2,ERG13,ERG2,LAP2,INP52,PSD1,PIK1,HST3,TCB1,ERG10,YDC1,ANT1
6468	protein phosphorylation	22 out of 361 genes, 6.1%	199 of 6338 genes, 3.1%	0.113973	KCC4,YIH1,DUN1,KIN1,PKH1,GIN4,ALK1,SIP2,PIL1,DBF2,CLB6,SWE1,HSL1,CDC5,CLN1,PCL1,MCK1,CIP1,FRK1,TPK2,CLN2,CLB2
51052	regulation of DNA metabolic process	14 out of 361 genes, 3.9%	107 of 6338 genes, 1.7%	0.184482	DEP1,SIR2,DUN1,CDC13,MSH6,SWI5,MHR1,CLB6,FKH1,CDC6,SSC1,ASH1,HST2,HHO1
51726	regulation of cell cycle	22 out of 361 genes, 6.1%	209 of 6338 genes, 3.3%	0.201527	KCC4,FIN1,CPR1,GIN4,RME1,DBF2,CLB6,KEL1,FKH1,FAR1,SWE1,HSL1,SLD2,ASH1,CDC5,AIP1,CLN1,NIS1,PCL1,CIP1,CLN2,CLB2
70647	protein modification by small protein conjugation or removal	2 out of 361 genes, 0.6%	169 of 6338 genes, 2.7%	0.238734	STP22,CDC53
55086	nucleobase-containing small molecule metabolic process	21 out of 361 genes, 5.8%	201 of 6338 genes, 3.2%	0.267523	ATP5,SAM2,RIP1,RNR1,ADK2,QCR6,HXK1,SOL3,RNR2,CYC1,ATP7,YNK1,SDH1,SAM1,TAL1,NDI1,COX5A,RAS2,ZWF1,ATP19,ALD6
51186	cofactor metabolic process	19 out of 361 genes, 5.3%	178 of 6338 genes, 2.8%	0.32372	COQ1,MET8,SAM2,COX15,HXK1,LSC2,COQ6,SOL3,ACP1,SAM1,TAL1,COQ5,NDI1,ZWF1,COQ2,LSC1,ALD6,COX10,YAH1
33043	regulation of organelle organization	27 out of 361 genes, 7.5%	289 of 6338 genes, 4.6%	0.343431	DEP1,CBP6,SED4,CDC13,FIN1,CPR1,MHR1,RME1,PCP1,PET54,KEL1,MAM33,FKH1,SWE1,CDC6,CDC45,CDC5,HOF1,AIP1,NIS1,PSD1,PET494,WTM1,HST2,HHO1,KIP2,CLB2
910	cytokinesis	11 out of 361 genes, 3.0%	81 of 6338 genes, 1.3%	0.394666	CHS2,BUD9,DBF2,MYO1,KEL1,AXL2,BUD4,RAX2,HOF1,AIP1,AIM44
6397	mRNA processing	3 out of 361 genes, 0.8%	175 of 6338 genes, 2.8%	0.637127	PKH1,FKH1,QRI5
8380	RNA splicing	2 out of 361 genes, 0.6%	144 of 6338 genes, 2.3%	0.772634	PET54,NAM2
23052	signaling	6 out of 361 genes, 1.7%	240 of 6338 genes, 3.8%	0.870335	MFA1,PKH1,SIP2,FAR1,TPK2,CLN2
48193	Golgi vesicle transport	4 out of 361 genes, 1.1%	190 of 6338 genes, 3%	0.960663	SED4,ERV29,BET1,TRX1
32196	transposition	1 out of 361 genes, 0.3%	110 of 6338 genes, 1.7%	1.01867	RTT107
51603	proteolysis involved in cellular protein catabolic process	7 out of 361 genes, 1.9%	249 of 6338 genes, 3.9%	1.36213	PIM1,STP22,CDC53,FIN1,UBX5,MDJ1,DOA1
42273	ribosomal large subunit biogenesis	1 out of 361 genes, 0.3%	103 of 6338 genes, 1.6%	1.44667	MRH4
6310	DNA recombination	16 out of 361 genes, 4.4%	174 of 6338 genes, 2.7%	1.87761	MCM7,MCD1,SIR2,CDC9,PDS1,MHR1,RIM4,SMC3,SLD2,CDC45,CDC5,MSC6,HST2,HHO1,MCM4,CTF4
6974	cellular response to DNA damage stimulus	24 out of 361 genes, 6.6%	298 of 6338 genes, 4.7%	2.06912	MCM7,MCD1,DUN1,CDC9,MSH6,PDS1,HTA1,SMC1,RTT107,SMC3,POL31,YNK1,SLD2,DOA1,CDC45,TOS4,SML1,HOF1,PMS1,POL1,MCK1,MCM4,CTF4,DPB2
7059	chromosome segregation	17 out of 361 genes, 4.7%	197 of 6338 genes, 3.1%	2.5049	MCD1,PDS1,FIN1,SPC110,CIN8,SMC1,IRR1,MPS3,SMC3,DYN1,SRC1,CDC5,MCK1,ASE1,NUD1,CLB2,CTF4
6366	transcription from RNA polymerase II promoter	20 out of 361 genes, 5.5%	477 of 6338 genes, 7.5%	2.8999	DEP1,HAP3,HCM1,HTA1,SUT1,RME1,FKH1,ASH1,YOX1,GAL80,SPT21,CAT8,NRM1,WTM1,HAP5,NDD1,HOS3,GAL4,CSR2,ARP7
48308	organelle inheritance	7 out of 361 genes, 1.9%	58 of 6338 genes, 0.9%	2.93545	NUM1,PHB2,MDM31,DNM1,TRX1,MMR1,TPM1
55085	transmembrane transport	19 out of 361 genes, 5.3%	236 of 6338 genes, 3.7%	3.16991	PET9,BAP3,ATP5,ITR1,OXA1,SUT1,SAM35,YIA6,TIM44,SSC1,ATP7,MIA40,HSP60,TOM40,SAM50,TOM22,ZIM17,SIL1,ATP19
6281	DNA repair	19 out of 361 genes, 5.3%	245 of 6338 genes, 3.9%	3.94879	MCM7,MCD1,CDC9,MSH6,PDS1,HTA1,SMC1,RTT107,SMC3,POL31,SLD2,DOA1,CDC45,PMS1,POL1,MCK1,MCM4,CTF4,DPB2
9451	RNA modification	5 out of 361 genes, 1.4%	170 of 6338 genes, 2.7%	4.12944	ATS1,FMT1,SLM3,MTO1,MRM1
746	conjugation	11 out of 361 genes, 3.0%	124 of 6338 genes, 2%	4.59256	HBT1,SPC110,MFA1,SUT1,KEL1,MPS3,FAR1,FPS1,CCW12,PRM1,CLN2
6873	cellular ion homeostasis	3 out of 361 genes, 0.8%	124 of 6338 genes, 2%	4.69934	CRD1,DBF2,MDM31
16197	endosomal transport	2 out of 361 genes, 0.6%	102 of 6338 genes, 1.6%	4.7032	STP22,PKH1
31399	regulation of protein modification process	10 out of 361 genes, 2.8%	115 of 6338 genes, 1.8%	5.70472	STP22,YIH1,PIL1,CLB6,SWE1,CLN1,PCL1,CIP1,CLN2,CLB2
6354	DNA-templated transcription, elongation	2 out of 361 genes, 0.6%	96 of 6338 genes, 1.5%	5.94128	FKH1,ARP7
7114	cell budding	6 out of 361 genes, 1.7%	58 of 6338 genes, 0.9%	6.59633	ATS1,KCC4,GIN4,AXL2,BUD4,TPM1
51321	meiotic cell cycle	19 out of 361 genes, 5.3%	279 of 6338 genes, 4.4%	7.11541	MSH6,PDS1,CPR1,RME1,CLB6,RIM4,MPS3,SMC3,SWE1,SUR7,CDC5,HHF2,PMS1,RAS2,POL1,MCK1,WTM1,MSC6,NUD1
18193	peptidyl-amino acid modification	5 out of 361 genes, 1.4%	150 of 6338 genes, 2.4%	7.17965	DUN1,PKH1,HSL1,HHF2,MCK1
6325	chromatin organization	21 out of 361 genes, 5.8%	317 of 6338 genes, 5.0%	7.22777	DEP1,MCM7,SIR2,CPR1,HTA1,IOC3,FKH1,MPS3,CDC6,IOC2,CDC45,RRN5,SPT21,HHF2,HST3,WTM1,HST2,HOS3,HHO1,ARP7,DPB2
42221	response to chemical	22 out of 361 genes, 6.1%	440 of 6338 genes, 6.9%	7.26505	HAP3,HCM1,HBT1,MHR1,YPR1,PDR15,MFA1,HPA3,SUT1,MTL1,FKH1,FAR1,FPS1,TRX1,CCW12,CAT8,RAS2,ZWF1,ZIM17,HAP5,GAL4,CLN2
71554	cell wall organization or biogenesis	8 out of 361 genes, 2.2%	200 of 6338 genes, 3.2%	7.89403	ROT2,PKH1,PMI40,MTL1,CIS3,CCW12,SRL1,CSR2
6457	protein folding	8 out of 361 genes, 2.2%	95 of 6338 genes, 1.5%	8.28202	TAH1,MDJ1,PHB2,SSC1,MIA40,HSP60,ZIM17,MPD2
6360	transcription from RNA polymerase I promoter	1 out of 361 genes, 0.3%	66 of 6338 genes, 1.0%	8.31275	RRN5
51604	protein maturation	5 out of 361 genes, 1.4%	49 of 6338 genes, 0.8%	8.74156	ICP55,PCP1,RAM2,HSP60,PSD1
15931	nucleobase-containing compound transport	4 out of 361 genes, 1.1%	123 of 6338 genes, 1.9%	8.92116	PET9,YIA6,MSK1,ANT1
32787	monocarboxylic acid metabolic process	10 out of 361 genes, 2.8%	134 of 6338 genes, 2.1%	9.24554	ETR1,DLD1,HXK1,ELO1,ACP1,CAT8,ABZ1,HST3,ALD6,ANT1
6418	tRNA aminoacylation for protein translation	4 out of 361 genes, 1.1%	36 of 6338 genes, 0.6%	9.58498	NAM2,MSK1,MSY1,MSD1
6811	ion transport	15 out of 361 genes, 4.2%	240 of 6338 genes, 3.8%	10.182	PET9,SCO1,HEM25,YDL183C,BAP3,ATP5,MUP1,YIA6,ATP7,COX17,FPS1,VNX1,ATP19,AMF1,ANT1
6605	protein targeting	17 out of 361 genes, 4.7%	305 of 6338 genes, 4.8%	10.2063	OM14,STP22,OXA1,SAM35,TOM71,TIM44,SSC1,MIA40,HSP60,TOM40,SAM50,RAS2,TOM22,ATG2,ZIM17,SIL1,WTM1
5975	carbohydrate metabolic process	13 out of 361 genes, 3.6%	255 of 6338 genes, 4.0%	10.5972	DEP1,ROT2,YPR1,SDH7,PMI40,HXK1,PMT6,INO1,GLG1,GAL80,YMR099C,CAT8,GAL4
6401	RNA catabolic process	5 out of 361 genes, 1.4%	132 of 6338 genes, 2.1%	10.8878	PKH1,POL31,RNH203,DSS1,RNH201
32200	telomere organization	2 out of 361 genes, 0.6%	77 of 6338 genes, 1.2%	11.7262	PBP2,CDC13
7124	pseudohyphal growth	6 out of 361 genes, 1.7%	74 of 6338 genes, 1.2%	11.8859	ITR1,FKH1,ASH1,TPM1,RAS2,SFG1
6520	cellular amino acid metabolic process	12 out of 361 genes, 3.3%	210 of 6338 genes, 3.3%	12.0976	DEP1,PET112,SAM2,HPA3,PUT2,SAM1,MET17,NAM2,MSK1,ABZ1,MSY1,MSD1
7033	vacuole organization	3 out of 361 genes, 0.8%	92 of 6338 genes, 1.5%	12.6421	TRX1,TPM1,ATG2
42255	ribosome assembly	1 out of 361 genes, 0.3%	56 of 6338 genes, 0.9%	12.7313	MRH4
8033	tRNA processing	4 out of 361 genes, 1.1%	106 of 6338 genes, 1.7%	13.3249	ATS1,FMT1,SLM3,MTO1
16050	vesicle organization	2 out of 361 genes, 0.6%	72 of 6338 genes, 1.1%	13.7595	SED4,BET1
51049	regulation of transport	3 out of 361 genes, 0.8%	88 of 6338 genes, 1.4%	13.9876	SED4,SUT1,KEL1
70925	organelle assembly	8 out of 361 genes, 2.2%	128 of 6338 genes, 2.0%	14.1984	KCC4,PKH1,GIN4,CIN8,MRH4,CDC5,ATG2,ASE1
16570	histone modification	5 out of 361 genes, 1.4%	114 of 6338 genes, 1.8%	14.94	DEP1,CPR1,HHF2,HST3,HOS3
43934	sporulation	7 out of 361 genes, 1.9%	133 of 6338 genes, 2.1%	15.24	CPR1,RIM4,SMC3,SUR7,HHF2,RAS2,MCK1
10324	membrane invagination	1 out of 361 genes, 0.3%	50 of 6338 genes, 0.8%	16.1936	ATG2
8213	protein alkylation	1 out of 361 genes, 0.3%	50 of 6338 genes, 0.8%	16.1936	HHF2
6979	response to oxidative stress	6 out of 361 genes, 1.7%	101 of 6338 genes, 1.6%	16.7718	HCM1,MHR1,YPR1,MTL1,TRX1,ZWF1
6417	regulation of translation	6 out of 361 genes, 1.7%	104 of 6338 genes, 1.6%	16.8429	CBP6,PET54,MAM33,TUB4,GUF1,PET494
6897	endocytosis	5 out of 361 genes, 1.4%	97 of 6338 genes, 1.5%	17.8244	PKH1,PIL1,YSC84,SUR7,CSR2
6970	response to osmotic stress	5 out of 361 genes, 1.4%	91 of 6338 genes, 1.4%	18.2924	ISC1,AIP1,MCK1,ALD6,IQG1
48284	organelle fusion	5 out of 361 genes, 1.4%	88 of 6338 genes, 1.4%	18.3745	SPC110,BET1,MPS3,TRX1,PSD1
6413	translational initiation	2 out of 361 genes, 0.6%	61 of 6338 genes, 1%	18.8397	RMD9,IFM1
61025	membrane fusion	4 out of 361 genes, 1.1%	75 of 6338 genes, 1.2%	20.2005	BET1,TRX1,PSD1,PRM1
9408	response to heat	4 out of 361 genes, 1.1%	70 of 6338 genes, 1.1%	20.4327	DEP1,MDJ1,PIL1,MCK1
7031	peroxisome organization	4 out of 361 genes, 1.1%	70 of 6338 genes, 1.1%	20.4327	MDV1,DNM1,ATG2,ANT1
6353	DNA-templated transcription, termination	1 out of 361 genes, 0.3%	43 of 6338 genes, 0.7%	21.0356	FKH1
6997	nucleus organization	3 out of 361 genes, 0.8%	66 of 6338 genes, 1.0%	21.3007	SPC110,MPS3,CDC5
6869	lipid transport	3 out of 361 genes, 0.8%	65 of 6338 genes, 1.0%	21.5631	SUT1,PRY2,LAM6
6865	amino acid transport	3 out of 361 genes, 0.8%	42 of 6338 genes, 0.7%	21.8368	HEM25,BAP3,MUP1
6486	protein glycosylation	3 out of 361 genes, 0.8%	62 of 6338 genes, 1%	22.2683	ROT2,PMI40,PMT6
1403	invasive growth in response to glucose limitation	3 out of 361 genes, 0.8%	59 of 6338 genes, 0.9%	22.828	SIP2,RME1,TPK2
6887	exocytosis	3 out of 361 genes, 0.8%	48 of 6338 genes, 0.8%	23.1518	KIN1,TPM1,SEC2
42594	response to starvation	3 out of 361 genes, 0.8%	56 of 6338 genes, 0.9%	23.2123	SUT1,SIP2,MTL1
6470	protein dephosphorylation	2 out of 361 genes, 0.6%	49 of 6338 genes, 0.8%	24.5262	PTC7,CLB2
902	cell morphogenesis	2 out of 361 genes, 0.6%	29 of 6338 genes, 0.5%	27.3785	HBT1,KEL1
8643	carbohydrate transport	2 out of 361 genes, 0.6%	33 of 6338 genes, 0.5%	28.1656	HXK1,FPS1
9311	oligosaccharide metabolic process	1 out of 361 genes, 0.3%	31 of 6338 genes, 0.5%	30.7201	ROT2
42274	ribosomal small subunit biogenesis	0 out of 361 genes, 0%	135 of 6338 genes, 2.1%	--	none
43543	protein acylation	0 out of 361 genes, 0%	66 of 6338 genes, 1.0%	--	none
43144	snoRNA processing	0 out of 361 genes, 0%	45 of 6338 genes, 0.7%	--	none
6383	transcription from RNA polymerase III promoter	0 out of 361 genes, 0%	41 of 6338 genes, 0.6%	--	none
6352	DNA-templated transcription, initiation	0 out of 361 genes, 0%	71 of 6338 genes, 1.1%	--	none
6766	vitamin metabolic process	0 out of 361 genes, 0%	43 of 6338 genes, 0.7%	--	none
6497	protein lipidation	0 out of 361 genes, 0%	45 of 6338 genes, 0.7%	--	none
54	ribosomal subunit export from nucleus	0 out of 361 genes, 0%	46 of 6338 genes, 0.7%	--	none
other	other	10 out of 361 genes, 2.8%	--	--	BDH1,YCR061W,QRI1,STF1,INH1,DUG1,STE6,LIP2,EGT2,DSE4
Component
GOID	GO term	Frequency	Genome Frequency	Corrected hypergeometric test (p-val)	Gene(s)
5739	mitochondrion	176 out of 361 genes, 48.8%	1175 of 6338 genes, 18.5%	2.56102e-40	CYC3,FMT1,PIM1,PET9,PET112,COQ1,ETR1,SCO1,CBP6,MRPL36,MRPS9,ROT2,OM14,MRPS5,MRPL37,MRPL32,IMG1,MCD1,SLM3,HEM25,STF1,CRD1,CDC9,DLD1,INH1,YDL183C,EHD3,BAP3,YDR061W,MRX14,MRPL1,NUM1,CPR1,MRPL7,MHR1,ATP5,MRPL35,MRPS28,MRP1,BCS1,MRP20,MRPL28,MZM1,SDH7,RIP1,CIN8,ISC1,CHO1,ICP55,COX15,OXA1,ADK2,MDJ1,QCR6,DUG1,HXK1,MRH4,MNP1,RMD9,MRF1,SAP4,MTO1,YGR021W,IMO32,MRP13,PIL1,PCP1,SHY1,MRPS35,MRPL9,PET54,PHB2,L…
5740	mitochondrial envelope	62 out of 361 genes, 17.2%	355 of 6338 genes, 5.6%	5.14772e-15	CYC3,PET9,SCO1,OM14,MRPL32,HEM25,DLD1,YDL183C,CPR1,ATP5,BCS1,SDH7,RIP1,ISC1,CHO1,ICP55,COX15,OXA1,ADK2,MDJ1,QCR6,RMD9,PIL1,PCP1,SHY1,PET54,PHB2,COQ6,YGR266W,SAM35,TOM71,ERG9,MDM31,YIA6,TIM44,COA1,MDV1,SSC1,CYC1,AIM24,ATP7,YNK1,CYT2,SDH1,MIA40,DNM1,COX17,TRX1,ERG27,UPS2,MMR1,QRI5,MCP2,TOM40,SAM50,COX5A,MIC27,TOM22,PSD1,COQ2,PET494,ATP19
5737	cytoplasm	304 out of 361 genes, 84.2%	4301 of 6338 genes, 67.9%	4.4459e-12	ATS1,CYC3,BDH1,FMT1,PIM1,PET9,PET112,COQ1,ETR1,SCO1,CBP6,MRPL36,MRPS9,MCM7,ROT2,OM14,PBP2,MRPS5,MRPL37,STP22,KCC4,MRPL32,IMG1,YIH1,TAH1,YCR061W,HCM1,SED4,MCD1,SLM3,QRI1,TMA17,HEM25,STF1,CRD1,CDC9,DLD1,YDL180W,INH1,YDL183C,EHD3,BAP3,YDR061W,MSH6,PDS1,MRX14,MRPL1,FIN1,SWI5,NUM1,CPR1,MRPL7,MHR1,ATP5,MRPL35,UBX5,MRPS28,MRP1,SPC110,YPR1,BCS1,MRP20,MFA1,MRPL28,PAC11,PKH1,MZM1,ITR1,SDH7,RIP1,CIN8,HPA3,P…
5840	ribosome	50 out of 361 genes, 13.9%	358 of 6338 genes, 5.6%	2.33374e-08	CBP6,MRPL36,MRPS9,MRPS5,MRPL37,MRPL32,IMG1,YIH1,TMA17,MRX14,MRPL1,MRPL7,MHR1,MRPL35,MRPS28,MRP1,MRP20,MRPL28,OXA1,DUG1,MRH4,MNP1,MRP13,MRPS35,MRPL9,MRP4,RSM25,MRPL8,MRPL49,RSM26,RSM7,MRPL31,MRPL38,MRPL20,YLL032C,GUF1,MRPL15,TMA10,MRPL4,MRPL3,MRPL24,NAM9,MRPL22,MRPL19,MRPL10,MRPS12,RSM19,NBA1,MRPL23,RTC6
5730	nucleolus	2 out of 361 genes, 0.6%	329 of 6338 genes, 5.2%	1.23788e-05	SIR2,RRN5
30427	site of polarized growth	34 out of 361 genes, 9.4%	261 of 6338 genes, 4.1%	5.77309e-05	CHS2,KCC4,NUM1,GIN4,BUD9,DBF2,MYO1,KEL1,AXL2,FAR1,CIS3,SWE1,BUD4,HSL1,STE6,RAX2,CCW12,MMR1,CDC5,HOF1,AIP1,NIS1,TPM1,INP52,SEC2,PRM1,DSE4,NBA1,SRL1,DSE3,HOS3,AIM44,IQG1,CLB2
5575	cellular component unknown	12 out of 361 genes, 3.3%	589 of 6338 genes, 9.3%	8.57142e-05	AIM1,SEF1,MET8,SAM2,ALK1,CLB6,GLG1,YLR049C,AIM33,YNL193W,MCK1,PBI1
5856	cytoskeleton	28 out of 361 genes, 7.8%	200 of 6338 genes, 3.2%	0.000112849	KCC4,PDS1,FIN1,SPC110,PAC11,CIN8,DBF2,YSC84,MYO1,AXL2,MPS3,BUD4,HSL1,DYN1,STU2,TUB4,CDC5,HOF1,AIP1,TPM1,INP52,SPC98,ASE1,NUD1,KIP2,IQG1,BBP1,CLB2
5933	cellular bud	31 out of 361 genes, 8.6%	240 of 6338 genes, 3.8%	0.000185967	CHS2,KCC4,NUM1,GIN4,BUD9,DBF2,MYO1,KEL1,AXL2,CIS3,SWE1,BUD4,HSL1,ASH1,RAX2,CCW12,MMR1,CDC5,HOF1,NIS1,TPM1,SEC2,EGT2,DSE4,NBA1,SRL1,DSE3,HOS3,AIM44,IQG1,CLB2
5794	Golgi apparatus	2 out of 361 genes, 0.6%	199 of 6338 genes, 3.1%	0.0124333	STE6,PIK1
12505	endomembrane system	36 out of 361 genes, 10%	977 of 6338 genes, 15.4%	0.0130552	ROT2,STP22,SED4,BAP3,NUM1,MFA1,ISC1,ERG28,ERG26,SCS3,CHO2,PMT6,ERV29,PTC7,ERG9,BET1,MPS3,CIS3,ELO1,OPI3,STE6,PRY2,RAX2,ERG27,SRC1,ERG2,YNL046W,RAS2,PIK1,SEC2,VNX1,SIL1,DSC2,MPD2,TCB1,YDC1
5938	cell cortex	18 out of 361 genes, 5%	146 of 6338 genes, 2.3%	0.0212913	KCC4,NUM1,PKH1,YSC84,MYO1,KEL1,AXL2,BUD4,HSL1,DYN1,STU2,SUR7,HOF1,AIP1,TPM1,INP52,TCB1,IQG1
5815	microtubule organizing center	11 out of 361 genes, 3.0%	73 of 6338 genes, 1.2%	0.0417923	FIN1,SPC110,DBF2,MPS3,DYN1,STU2,TUB4,SPC98,NUD1,BBP1,CLB2
5773	vacuole	19 out of 361 genes, 5.3%	564 of 6338 genes, 8.9%	0.0610782	STP22,YDL180W,ITR1,MUP1,AXL2,CIS3,STE6,PRY2,FPS1,TRX1,CCW12,MIC27,PRM1,VNX1,EGT2,CPR8,MRPL23,SRL1,YDC1
5634	nucleus	108 out of 361 genes, 29.9%	2207 of 6338 genes, 34.8%	0.135896	DEP1,HAP3,MCM7,PBP2,YIH1,TAH1,HCM1,MCD1,SIR2,DUN1,QRI1,TMA17,CDC9,CDC13,MSH6,PDS1,MRX14,FIN1,SWI5,CPR1,HTA1,MHR1,UBX5,SPC110,YPR1,GTT3,CIN8,HPA3,PMI40,RNR1,ICP55,SMC1,IOC3,QCR6,SUT1,RME1,PTC7,RTT107,SOL3,MDM31,IRR1,FKH1,MPS3,RNR2,SMC3,FAR1,SWE1,CDC6,POL31,SLD2,ASH1,DOA1,YKR075C,TRX1,STU2,IOC2,CDC45,ACE2,RRN5,RNH203,TOS4,GUF1,TMA10,TAL1,YOX1,SRC1,GAL80,SML1,ERG13,CDC5,AIP1,YMR099C,SPT21,CLN1,CAT8,…
5694	chromosome	29 out of 361 genes, 8.0%	382 of 6338 genes, 6.0%	0.52981	DEP1,MCM7,HCM1,MCD1,SIR2,CDC9,CDC13,FIN1,CPR1,HTA1,CIN8,SMC1,IRR1,MPS3,SMC3,POL31,ASH1,STU2,CDC45,TOS4,YOX1,SRC1,HHF2,POL1,HHO1,TPK2,MCM4,CTF4,DPB2
16020	membrane	101 out of 361 genes, 28%	1618 of 6338 genes, 25.5%	0.613078	PET9,SCO1,CHS2,OM14,STP22,KCC4,MRPL32,YCR061W,SED4,HEM25,CRD1,DLD1,YDL180W,YDL183C,HBT1,BAP3,KIN1,ATP5,BCS1,PDR15,ITR1,RIP1,ISC1,CHO1,ERG28,ICP55,COX15,OXA1,ADK2,MDJ1,QCR6,ERG26,RMD9,SCS3,SIP2,MTL1,BUD9,MUP1,PIL1,PCP1,SHY1,CHO2,PMT6,PET54,PHB2,COQ6,YGR266W,ERV29,SAM35,TOM71,KEL1,ERG9,MDM31,BET1,YIA6,TIM44,AXL2,COA1,YIR035C,MPS3,MDV1,FAR1,CIS3,ELO1,SSC1,OPI3,AIM24,ATP7,SDH1,MIA40,STE6,DNM1,FPS1,RA…
5783	endoplasmic reticulum	29 out of 361 genes, 8.0%	615 of 6338 genes, 9.7%	0.956067	ROT2,SED4,BAP3,NUM1,MFA1,ISC1,ERG28,ERG26,SCS3,CHO2,PMT6,ERV29,ERG9,BET1,CIS3,ELO1,OPI3,PRY2,RAX2,ERG27,ERG2,YNL046W,RAS2,VNX1,SIL1,DSC2,MPD2,TCB1,YDC1
5576	extracellular region	4 out of 361 genes, 1.1%	31 of 6338 genes, 0.5%	1.56043	MFA1,CIS3,PRY2,DSE4
16023	cytoplasmic, membrane-bounded vesicle	3 out of 361 genes, 0.8%	105 of 6338 genes, 1.7%	1.99361	ERV29,BET1,SEC2
5886	plasma membrane	21 out of 361 genes, 5.8%	392 of 6338 genes, 6.2%	2.0188	STP22,KCC4,HBT1,BAP3,KIN1,ITR1,SIP2,MTL1,BUD9,MUP1,PIL1,YGR266W,AXL2,CIS3,STE6,FPS1,MET17,SUR7,RAS2,TCB1,AMF1
5618	cell wall	8 out of 361 genes, 2.2%	98 of 6338 genes, 1.5%	2.05045	CIS3,BUD4,RAX2,CCW12,TOS6,EGT2,DSE4,SRL1
5777	peroxisome	2 out of 361 genes, 0.6%	75 of 6338 genes, 1.2%	2.8499	DNM1,ANT1
other	other	1 out of 361 genes, 0.3%	--	--	CDC53
Note: Only S. uvarum genes that have S. cerevisiae homologs are included in this GO-term analysis, but the background gene set was not adjusted. GO-term analysis was conducted using SGD GO-Slim Mapper (http://www.yeastgenome.org/cgi-bin/GO/goSlimMapper.pl). Hypergeometric test was corrected by multipling by the number of terms in each category (e.g. process).

## Sheet: GOslim_14h_UpMut
GO-Slim Mapper results for genes that are two-folds up-regulated in S. uvarum gal80∆ gal80b∆ relative to wild-type at FDR=0.05 after the growth resumed (mid-log phase)
Function
GOID	GO term	Frequency	Genome Frequency	Corrected hypergeometric test (p-val)	Gene(s)
3735	structural constituent of ribosome	99 out of 251 genes, 39.4%	231 of 6338 genes, 3.6%	1.5189e-81	RPL19B,RPL23A,RPL32,RPL4A,RPL19A,RPS6B,RPL21A,RPS14A,RPS29B,RPL31A,RPL13A,RPS16B,RPP1B,RPL35A,RPL4B,RPS11A,RSM10,RPS13,RPS18A,RPL27B,RPL12A,RPL34A,RPS24A,RPS8B,RPL23B,RPS26B,RPL22B,RPL2A,RPL30,RPL7A,RPS2,RPL1B,RPL9A,RPL26B,MRP13,RPL11B,RPL24B,RPS0A,RPL14B,RPS20,RPL8A,RPL27A,RPS27B,RPS4B,RPL2B,RPL34B,RPS24B,RPL16A,MRPL49,RPL17B,RPL39,RPS22A,RPS14B,RPL43B,RPS5,RPS4A,RPL14A,RPS27A,RPL17A,RPS21A,RPL4…
5198	structural molecule activity	99 out of 251 genes, 39.4%	350 of 6338 genes, 5.5%	6.98041e-61	RPL19B,RPL23A,RPL32,RPL4A,RPL19A,RPS6B,RPL21A,RPS14A,RPS29B,RPL31A,RPL13A,RPS16B,RPP1B,RPL35A,RPL4B,RPS11A,RSM10,RPS13,RPS18A,RPL27B,RPL12A,RPL34A,RPS24A,RPS8B,RPL23B,RPS26B,RPL22B,RPL2A,RPL30,RPL7A,RPS2,RPL1B,RPL9A,RPL26B,MRP13,RPL11B,RPL24B,RPS0A,RPL14B,RPS20,RPL8A,RPL27A,RPS27B,RPS4B,RPL2B,RPL34B,RPS24B,RPL16A,MRPL49,RPL17B,RPL39,RPS22A,RPS14B,RPL43B,RPS5,RPS4A,RPL14A,RPS27A,RPL17A,RPS21A,RPL4…
3674	molecular function unknown	42 out of 251 genes, 16.7%	1849 of 6338 genes, 29.2%	5.78211e-05	ATS1,MAK16,KRR1,YCR051W,RSA4,YCR087C-A,KNH1,RRP42,RRP1,ARX1,UTP5,RRP17,CWC21,YER156C,NSA1,MTO1,SDA1,OCA5,ERC1,FYV4,RRP4,MMF1,RRT14,ALB1,MAK11,TMA19,LTV1,DPH2,SRP40,YLR042C,PWP1,INA1,AIM32,UTP14,YMR265C,KRE33,YOL014W,TMA16,YTM1,RRS1,YOR342C,NIP7
8168	methyltransferase activity	15 out of 251 genes, 6%	90 of 6338 genes, 1.4%	7.00776e-05	HMT1,NOP1,TRM3,TRM1,RMT2,EFM1,EFM4,EMG1,TRM9,NOP2,TRM10,TRM11,TRM13,MRM1,DIM1
16787	hydrolase activity	16 out of 251 genes, 6.4%	870 of 6338 genes, 13.7%	0.00347058	SSB1,ASP1,ARB1,SAH1,MRH4,RRP3,NUC1,NPA3,DRS1,MDN1,RNH203,YEF3,DBP9,HAS1,DBP6,RCL1
19843	rRNA binding	13 out of 251 genes, 5.2%	104 of 6338 genes, 1.6%	0.00695907	NOP6,RPS13,MRH4,RPS2,SSF1,RPF1,RPS14B,MRT4,RPF2,RPP0,UTP23,RPS9A,RPL5
51082	unfolded protein binding	10 out of 251 genes, 4%	70 of 6338 genes, 1.1%	0.0133883	SSB1,MDJ1,ZUO1,SSZ1,SQT1,PAM18,CPR6,RRB1,PNO1,YAR1
22857	transmembrane transporter activity	3 out of 251 genes, 1.2%	319 of 6338 genes, 5.0%	0.0343829	BAP2,ATO3,HXT2
3677	DNA binding	5 out of 251 genes, 2%	389 of 6338 genes, 6.1%	0.0451771	REI1,NSR1,KAE1,STM1,ILV5
3723	RNA binding	49 out of 251 genes, 19.5%	844 of 6338 genes, 13.3%	0.0573336	RPS14A,PWP2,LHP1,NHP2,NOP6,RPS13,RPL30,MRH4,RPS2,RPL26B,NOP7,RPL24B,NSR1,TIF4631,RPL14B,RPS20,SSF1,RPF1,GAR1,RPL16A,RPS14B,RPL14A,MRT4,EBP2,RPF2,MEU1,RPL15A,YEF3,DBP9,RPP0,RPL26A,DUS3,RPL6B,IMD4,RPL6A,RPL15B,RPL36A,HAS1,NOP13,TRM11,RPL25,UTP23,TMA46,RPS9A,NAN1,RPL5,RPL36B,TIF5,TIF3
3729	mRNA binding	14 out of 251 genes, 5.6%	172 of 6338 genes, 2.7%	0.210702	RPS14A,PWP2,NOP7,NSR1,TIF4631,RPS20,EBP2,MEU1,DBP9,DUS3,IMD4,TMA46,NAN1,TIF3
16301	kinase activity	2 out of 251 genes, 0.8%	195 of 6338 genes, 3.1%	0.50176	HXK2,ADO1
4386	helicase activity	6 out of 251 genes, 2.4%	86 of 6338 genes, 1.4%	3.14122	MRH4,RRP3,DRS1,DBP9,HAS1,DBP6
16740	transferase activity	32 out of 251 genes, 12.7%	831 of 6338 genes, 13.1%	3.32829	PRS4,CDS1,HMT1,ARO4,SHM1,NOP1,SLM3,TRM3,HEM3,TRM1,RPA14,RMT2,HIS1,HXK2,EFM1,EFM4,ADO1,MEU1,SPE4,EMG1,TRM9,APT1,ILV2,NOP2,RPC19,RPA49,PRS5,TRM10,TRM11,TRM13,MRM1,DIM1
43167	ion binding	4 out of 251 genes, 1.6%	183 of 6338 genes, 2.9%	3.48504	RBG1,ILV2,NOG1,SSE1
16829	lyase activity	1 out of 251 genes, 0.4%	90 of 6338 genes, 1.4%	4.2514	SPE2
16491	oxidoreductase activity	9 out of 251 genes, 3.6%	281 of 6338 genes, 4.4%	4.73988	LIA1,TRX1,ILV5,DUS3,IMD4,DUS1,PGA3,SMM1,ALD6
30234	enzyme regulator activity	7 out of 251 genes, 2.8%	232 of 6338 genes, 3.7%	4.97796	RPP1B,MDJ1,PAM18,RCL1,RPP2A,SSE1,TIF5
4518	nuclease activity	3 out of 251 genes, 1.2%	137 of 6338 genes, 2.2%	5.06757	NUC1,RNH203,RCL1
16853	isomerase activity	4 out of 251 genes, 1.6%	59 of 6338 genes, 0.9%	5.3479	HIS6,CPR6,FPR3,RKI1
16887	ATPase activity	11 out of 251 genes, 4.4%	263 of 6338 genes, 4.1%	5.3919	SSB1,ARB1,MRH4,RRP3,NPA3,DRS1,MDN1,YEF3,DBP9,HAS1,DBP6
3682	chromatin binding	2 out of 251 genes, 0.8%	107 of 6338 genes, 1.7%	5.58677	KAE1,IPI3
8135	translation factor activity, RNA binding	3 out of 251 genes, 1.2%	43 of 6338 genes, 0.7%	6.71497	TIF4631,YEF3,TIF5
8092	cytoskeletal protein binding	1 out of 251 genes, 0.4%	67 of 6338 genes, 1.1%	8.08094	ELP2
16779	nucleotidyltransferase activity	4 out of 251 genes, 1.6%	121 of 6338 genes, 1.9%	8.18912	CDS1,RPA14,RPC19,RPA49
3924	GTPase activity	1 out of 251 genes, 0.4%	63 of 6338 genes, 1%	8.9407	NPA3
16874	ligase activity	3 out of 251 genes, 1.2%	97 of 6338 genes, 1.5%	9.07038	ASN2,DED81,FRS1
16757	transferase activity, transferring glycosyl groups	3 out of 251 genes, 1.2%	96 of 6338 genes, 1.5%	9.15353	HIS1,MEU1,APT1
8565	protein transporter activity	1 out of 251 genes, 0.4%	51 of 6338 genes, 0.8%	11.783	KAP123
30674	protein binding, bridging	0 out of 251 genes, 0%	61 of 6338 genes, 1%	--	none
19899	enzyme binding	0 out of 251 genes, 0%	66 of 6338 genes, 1.0%	--	none
8134	transcription factor binding	0 out of 251 genes, 0%	69 of 6338 genes, 1.1%	--	none
16798	hydrolase activity, acting on glycosyl bonds	0 out of 251 genes, 0%	47 of 6338 genes, 0.7%	--	none
8233	peptidase activity	0 out of 251 genes, 0%	138 of 6338 genes, 2.2%	--	none
4871	signal transducer activity	0 out of 251 genes, 0%	38 of 6338 genes, 0.6%	--	none
30533	triplet codon-amino acid adaptor activity	0 out of 251 genes, 0%	299 of 6338 genes, 4.7%	--	none
5085	guanyl-nucleotide exchange factor activity	0 out of 251 genes, 0%	46 of 6338 genes, 0.7%	--	none
30555	RNA modification guide activity	0 out of 251 genes, 0%	71 of 6338 genes, 1.1%	--	none
16791	phosphatase activity	0 out of 251 genes, 0%	94 of 6338 genes, 1.5%	--	none
42393	histone binding	0 out of 251 genes, 0%	41 of 6338 genes, 0.6%	--	none
8289	lipid binding	0 out of 251 genes, 0%	101 of 6338 genes, 1.6%	--	none
1071	nucleic acid binding transcription factor activity	0 out of 251 genes, 0%	163 of 6338 genes, 2.6%	--	none
32182	ubiquitin-like protein binding	0 out of 251 genes, 0%	43 of 6338 genes, 0.7%	--	none
988	transcription factor activity, protein binding	0 out of 251 genes, 0%	124 of 6338 genes, 2%	--	none
other	other	5 out of 251 genes, 2%	--	--	TSR1,ZPR1,YHL008C,MAM33,MDM38
Process
GOID	GO term	Frequency	Genome Frequency	Corrected hypergeometric test (p-val)	Gene(s)
2181	cytoplasmic translation	102 out of 251 genes, 40.6%	179 of 6338 genes, 2.8%	9.49776e-101	RBG1,RPL19B,RPL23A,RPL32,RPL4A,RPL19A,RPS6B,RPL21A,RPS14A,RPS29B,RPL31A,RPL13A,RPS16B,RPP1B,RPL35A,SSB1,RPL4B,RPS11A,RPS13,RPS18A,RPL27B,RPL12A,RPL34A,RPS24A,RPS8B,RPL23B,RPS26B,RPL22B,RPL2A,RPL30,RPL7A,RPL1B,RPL9A,RPL26B,RPL11B,RPL24B,RPS0A,RPL14B,RPS20,RPL8A,RPL27A,RPS27B,SSZ1,RPS4B,RPL2B,RPL34B,RPS24B,RPL16A,RPL17B,RPL39,RPS22A,RPS14B,RPL43B,RPS5,RPS4A,RPL14A,TMA19,RPS27A,RPL17A,RPS21A,RPL40B,…
42273	ribosomal large subunit biogenesis	45 out of 251 genes, 17.9%	103 of 6338 genes, 1.6%	7.08078e-35	MAK16,REI1,RSA4,RPL35A,RPL12A,MRH4,RPL7A,NSA1,RPL11B,NOP7,TIF4631,SDA1,RPL8A,SSF1,RPF1,SQT1,ALB1,RPL17B,MRT4,MAK11,RPL17A,RPF2,RPL40B,DRS1,RPL8B,RPL10,MDN1,RPL37A,DBP9,RPP0,RPL6B,RPL6A,HAS1,NOP2,IPI3,DBP6,RPL25,RPL3,YTM1,RRS1,NOG1,RPL5,RPL7B,NIP7,RPL11A
6364	rRNA processing	70 out of 251 genes, 27.9%	311 of 6338 genes, 4.9%	1.03036e-33	MAK16,RPS6B,KRR1,RPS14A,PWP2,NOP1,TSR1,RPS16B,RRP42,RPL35A,NHP2,SSB1,RPS11A,RPS13,RRP1,UTP5,RRP17,RPS18A,RPS24A,RPS8B,RPL30,RPL7A,NOP7,NSR1,RPS0A,ZUO1,RPS20,RPL8A,RPS27B,SSZ1,RRP3,SSF1,RRP4,RPF1,RPS24B,RPL17B,RPS14B,MRT4,MAK11,RPS27A,EBP2,RPL17A,RPS21A,RPF2,DRS1,RPL8B,RPS0B,MDN1,RPL37A,EMG1,PWP1,DBP9,RPS18B,UTP14,HAS1,NOP2,IPI3,DBP6,RCL1,UTP23,PNO1,MRM1,RRS1,RPS9A,RPS6A,NOG1,NAN1,RPL7B,NIP7,DIM1
42255	ribosome assembly	31 out of 251 genes, 12.4%	56 of 6338 genes, 0.9%	1.21975e-27	RPS14A,RSA4,RPS11A,RPL12A,MRH4,RPL11B,NSR1,RPS0A,RPS27B,SSF1,RPF1,SQT1,RPS14B,MRT4,MAK11,RPS27A,RPF2,RPL40B,DRS1,RPS0B,RPL10,MDN1,RPP0,RPL6B,RPL6A,IPI3,RPL25,RPL3,RPL5,TIF5,RPL11A
42274	ribosomal small subunit biogenesis	40 out of 251 genes, 15.9%	135 of 6338 genes, 2.1%	4.24178e-23	RPS6B,KRR1,RPS14A,PWP2,TSR1,RPS16B,NOP6,RPS11A,RPS13,UTP5,RPS18A,RPS24A,RPS8B,NOP7,NSR1,RPS0A,RPS20,RPS27B,RRP3,RPS24B,RPS14B,LTV1,RPS27A,RPS21A,RPS0B,EMG1,RPS18B,UTP14,HAS1,KRE33,RPS19B,RCL1,UTP23,PNO1,RRS1,RPS9A,RPS6A,NAN1,YAR1,DIM1
70925	organelle assembly	32 out of 251 genes, 12.7%	128 of 6338 genes, 2.0%	8.98347e-16	RPS14A,RSA4,RPS11A,RPL12A,MRH4,RPL11B,NSR1,TIF4631,RPS0A,RPS27B,SSF1,RPF1,SQT1,RPS14B,MRT4,MAK11,RPS27A,RPF2,RPL40B,DRS1,RPS0B,RPL10,MDN1,RPP0,RPL6B,RPL6A,IPI3,RPL25,RPL3,RPL5,TIF5,RPL11A
51169	nuclear transport	29 out of 251 genes, 11.6%	177 of 6338 genes, 2.8%	3.12942e-09	HMT1,REI1,SSB1,ARX1,RPS18A,ARB1,KAP123,RPS26B,RPS2,RPS0A,SDA1,ZUO1,RPF1,NPA3,RPS5,LTV1,SRP40,RPL40B,RPS0B,RPS28B,RPS18B,RPS10B,RPS19B,RPS15,RPS28A,RPS10A,RRS1,NOG1,YAR1
8150	biological process unknown	15 out of 251 genes, 6%	1049 of 6338 genes, 16.6%	1.81546e-05	YCR051W,YCR087C-A,YER156C,OCA5,FYV4,RRT14,YLR042C,INA1,AIM32,IMD4,YMR265C,NOP13,YOL014W,TMA16,YOR342C
54	ribosomal subunit export from nucleus	11 out of 251 genes, 4.4%	46 of 6338 genes, 0.7%	0.00010526	SSB1,ARX1,ARB1,SDA1,ZUO1,RPF1,LTV1,RPL40B,RRS1,NOG1,YAR1
9451	RNA modification	21 out of 251 genes, 8.4%	170 of 6338 genes, 2.7%	0.000218628	ATS1,NOP1,SLM3,TRM3,NHP2,TRM1,MTO1,ELP2,GAR1,KAE1,EMG1,DUS3,TRM9,DUS1,NOP2,SMM1,TRM10,TRM11,TRM13,MRM1,DIM1
6366	transcription from RNA polymerase II promoter	3 out of 251 genes, 1.2%	477 of 6338 genes, 7.5%	0.000313632	HMT1,ELP2,KAE1
8033	tRNA processing	15 out of 251 genes, 6%	106 of 6338 genes, 1.7%	0.00122901	ATS1,SLM3,LHP1,TRM3,TRM1,MTO1,ELP2,KAE1,DUS3,TRM9,DUS1,SMM1,TRM10,TRM11,TRM13
6974	cellular response to DNA damage stimulus	1 out of 251 genes, 0.4%	298 of 6338 genes, 4.7%	0.00571175	TAH11
51321	meiotic cell cycle	1 out of 251 genes, 0.4%	279 of 6338 genes, 4.4%	0.0119228	FPR3
6325	chromatin organization	2 out of 251 genes, 0.8%	317 of 6338 genes, 5.0%	0.0186012	NOP1,FPR3
42221	response to chemical	5 out of 251 genes, 2%	440 of 6338 genes, 6.9%	0.022141	TMA19,LTV1,TRX1,TRM9,YAR1
15931	nucleobase-containing compound transport	14 out of 251 genes, 5.6%	123 of 6338 genes, 1.9%	0.0239189	HMT1,RPS18A,RPS26B,RPS2,RPS0A,RPS5,RPS0B,RPS28B,RPS18B,RPS10B,RPS19B,RPS15,RPS28A,RPS10A
51603	proteolysis involved in cellular protein catabolic process	1 out of 251 genes, 0.4%	249 of 6338 genes, 3.9%	0.0375431	MDJ1
6281	DNA repair	1 out of 251 genes, 0.4%	245 of 6338 genes, 3.9%	0.0436814	TAH11
23052	signaling	1 out of 251 genes, 0.4%	240 of 6338 genes, 3.8%	0.0527561	STM1
6629	lipid metabolic process	2 out of 251 genes, 0.8%	286 of 6338 genes, 4.5%	0.0558573	CDS1,SAH1
6605	protein targeting	3 out of 251 genes, 1.2%	305 of 6338 genes, 4.8%	0.12418	KAP123,NPA3,PAM18
48285	organelle fission	3 out of 251 genes, 1.2%	297 of 6338 genes, 4.7%	0.160337	NPA3,EBP2,FPR3
5975	carbohydrate metabolic process	2 out of 251 genes, 0.8%	255 of 6338 genes, 4.0%	0.162689	KNH1,HXK2
6417	regulation of translation	11 out of 251 genes, 4.4%	104 of 6338 genes, 1.6%	0.182522	RPL31A,SSB1,RPS2,ZUO1,SSZ1,MAM33,RPS5,STM1,RPL31B,MDM38,TIF5
70271	protein complex biogenesis	4 out of 251 genes, 1.6%	329 of 6338 genes, 5.2%	0.199396	FPR3,MDM38,PNO1,TIF3
33043	regulation of organelle organization	3 out of 251 genes, 1.2%	289 of 6338 genes, 4.6%	0.206475	MAM33,FPR3,MDM38
6468	protein phosphorylation	1 out of 251 genes, 0.4%	199 of 6338 genes, 3.1%	0.241929	RPP1B
7059	chromosome segregation	1 out of 251 genes, 0.4%	197 of 6338 genes, 3.1%	0.260258	NPA3
278	mitotic cell cycle	4 out of 251 genes, 1.6%	319 of 6338 genes, 5.0%	0.267895	REI1,ZPR1,SDA1,NPA3
48193	Golgi vesicle transport	1 out of 251 genes, 0.4%	190 of 6338 genes, 3%	0.335705	TRX1
71554	cell wall organization or biogenesis	2 out of 251 genes, 0.8%	200 of 6338 genes, 3.2%	0.985212	PRS4,PRS5
7010	cytoskeleton organization	3 out of 251 genes, 1.2%	237 of 6338 genes, 3.7%	0.99224	ATS1,SDA1,LIA1
55085	transmembrane transport	3 out of 251 genes, 1.2%	236 of 6338 genes, 3.7%	1.02118	BAP2,ATO3,PAM18
6397	mRNA processing	2 out of 251 genes, 0.8%	175 of 6338 genes, 2.8%	2.11786	CWC21,RPL30
51726	regulation of cell cycle	3 out of 251 genes, 1.2%	209 of 6338 genes, 3.3%	2.1651	ZPR1,SDA1,FPR3
6811	ion transport	4 out of 251 genes, 1.6%	240 of 6338 genes, 3.8%	2.28511	BAP2,ATO3,YHL008C,MDM38
70647	protein modification by small protein conjugation or removal	2 out of 251 genes, 0.8%	169 of 6338 genes, 2.7%	2.52877	ELP2,RPL40B
746	conjugation	1 out of 251 genes, 0.4%	124 of 6338 genes, 2%	3.34175	SSF1
6873	cellular ion homeostasis	1 out of 251 genes, 0.4%	124 of 6338 genes, 2%	3.34175	MDM38
8213	protein alkylation	5 out of 251 genes, 2%	50 of 6338 genes, 0.8%	3.35161	HMT1,NOP1,RMT2,EFM1,EFM4
7005	mitochondrion organization	11 out of 251 genes, 4.4%	420 of 6338 genes, 6.6%	3.78913	SLM3,RSM10,MDJ1,MTO1,MRP13,MMF1,MAM33,MRPL49,PAM18,ILV5,MDM38
6091	generation of precursor metabolites and energy	2 out of 251 genes, 0.8%	153 of 6338 genes, 2.4%	4.00069	HXK2,MAM33
31399	regulation of protein modification process	1 out of 251 genes, 0.4%	115 of 6338 genes, 1.8%	4.48354	RPP1B
16570	histone modification	1 out of 251 genes, 0.4%	114 of 6338 genes, 1.8%	4.63055	NOP1
8380	RNA splicing	2 out of 251 genes, 0.8%	144 of 6338 genes, 2.3%	5.126	CWC21,RPL30
6520	cellular amino acid metabolic process	12 out of 251 genes, 4.8%	210 of 6338 genes, 3.3%	5.58885	SHM1,ASP1,SAH1,HIS1,ASN2,DED81,HIS6,MMF1,MEU1,FRS1,ILV5,ILV2
6414	translational elongation	9 out of 251 genes, 3.6%	333 of 6338 genes, 5.3%	6.08614	RPL31A,SSB1,RPS2,ZUO1,SSZ1,RPS5,STM1,YEF3,RPL31B
6360	transcription from RNA polymerase I promoter	5 out of 251 genes, 2%	66 of 6338 genes, 1.0%	7.45956	RPA14,UTP5,RPC19,RPA49,NAN1
7033	vacuole organization	1 out of 251 genes, 0.4%	92 of 6338 genes, 1.5%	9.19336	TRX1
6310	DNA recombination	4 out of 251 genes, 1.6%	174 of 6338 genes, 2.7%	9.43362	RPS16B,NUC1,TAH11,KAE1
48284	organelle fusion	1 out of 251 genes, 0.4%	88 of 6338 genes, 1.4%	10.3538	TRX1
6401	RNA catabolic process	7 out of 251 genes, 2.8%	132 of 6338 genes, 2.1%	11.7291	RRP42,RRP4,NUC1,MRT4,RNH203,RPS28B,RPS28A
45333	cellular respiration	1 out of 251 genes, 0.4%	83 of 6338 genes, 1.3%	11.9756	MAM33
51052	regulation of DNA metabolic process	2 out of 251 genes, 0.8%	107 of 6338 genes, 1.7%	12.8242	TAH11,IPI3
6413	translational initiation	4 out of 251 genes, 1.6%	61 of 6338 genes, 1%	12.99	TIF4631,STM1,TIF5,TIF3
6260	DNA replication	4 out of 251 genes, 1.6%	150 of 6338 genes, 2.4%	13.7975	NOP7,TAH11,RNH203,IPI3
55086	nucleobase-containing small molecule metabolic process	7 out of 251 genes, 2.8%	201 of 6338 genes, 3.2%	14.5635	SAH1,HXK2,ERC1,ADO1,APT1,RKI1,ALD6
61025	membrane fusion	1 out of 251 genes, 0.4%	75 of 6338 genes, 1.2%	14.9931	TRX1
6457	protein folding	5 out of 251 genes, 2%	95 of 6338 genes, 1.5%	15.1156	SSB1,MDJ1,ZUO1,CPR6,SSE1
7124	pseudohyphal growth	1 out of 251 genes, 0.4%	74 of 6338 genes, 1.2%	15.4081	KAP123
6766	vitamin metabolic process	3 out of 251 genes, 1.2%	43 of 6338 genes, 0.7%	15.4139	SPE4,SPE2,RKI1
51186	cofactor metabolic process	7 out of 251 genes, 2.8%	178 of 6338 genes, 2.8%	15.5696	HEM3,HXK2,ERC1,SPE4,SPE2,RKI1,ALD6
6354	DNA-templated transcription, elongation	2 out of 251 genes, 0.8%	96 of 6338 genes, 1.5%	16.1424	HMT1,RPA49
32543	mitochondrial translation	6 out of 251 genes, 2.4%	167 of 6338 genes, 2.6%	16.2076	RSM10,MRP13,MMF1,MAM33,MRPL49,MDM38
43144	snoRNA processing	3 out of 251 genes, 1.2%	45 of 6338 genes, 0.7%	16.3543	NOP1,RRP42,RRP4
18193	peptidyl-amino acid modification	6 out of 251 genes, 2.4%	150 of 6338 genes, 2.4%	16.753	HMT1,RMT2,EFM1,EFM4,LIA1,DPH2
32787	monocarboxylic acid metabolic process	4 out of 251 genes, 1.6%	134 of 6338 genes, 2.1%	16.7649	HXK2,SPE4,SPE2,ALD6
9408	response to heat	1 out of 251 genes, 0.4%	70 of 6338 genes, 1.1%	17.153	MDJ1
6979	response to oxidative stress	4 out of 251 genes, 1.6%	101 of 6338 genes, 1.6%	20.2964	TMA19,LTV1,TRX1,YAR1
42594	response to starvation	3 out of 251 genes, 1.2%	56 of 6338 genes, 0.9%	20.5215	RBG1,SSB1,ZPR1
6970	response to osmotic stress	3 out of 251 genes, 1.2%	91 of 6338 genes, 1.4%	21.8776	LTV1,ALD6,YAR1
32200	telomere organization	2 out of 251 genes, 0.8%	77 of 6338 genes, 1.2%	22.4202	KAE1,STM1
48308	organelle inheritance	1 out of 251 genes, 0.4%	58 of 6338 genes, 0.9%	23.1509	TRX1
8643	carbohydrate transport	2 out of 251 genes, 0.8%	33 of 6338 genes, 0.5%	23.9694	HXK2,HXT2
6418	tRNA aminoacylation for protein translation	2 out of 251 genes, 0.8%	36 of 6338 genes, 0.6%	25.343	DED81,FRS1
7114	cell budding	2 out of 251 genes, 0.8%	58 of 6338 genes, 0.9%	27.3504	ATS1,REI1
6353	DNA-templated transcription, termination	1 out of 251 genes, 0.4%	43 of 6338 genes, 0.7%	31.5428	HMT1
6865	amino acid transport	1 out of 251 genes, 0.4%	42 of 6338 genes, 0.7%	32.0832	BAP2
6383	transcription from RNA polymerase III promoter	1 out of 251 genes, 0.4%	41 of 6338 genes, 0.6%	32.6141	RPC19
910	cytokinesis	0 out of 251 genes, 0%	81 of 6338 genes, 1.3%	--	none
6486	protein glycosylation	0 out of 251 genes, 0%	62 of 6338 genes, 1%	--	none
51049	regulation of transport	0 out of 251 genes, 0%	88 of 6338 genes, 1.4%	--	none
6470	protein dephosphorylation	0 out of 251 genes, 0%	49 of 6338 genes, 0.8%	--	none
51604	protein maturation	0 out of 251 genes, 0%	49 of 6338 genes, 0.8%	--	none
16197	endosomal transport	0 out of 251 genes, 0%	102 of 6338 genes, 1.6%	--	none
902	cell morphogenesis	0 out of 251 genes, 0%	29 of 6338 genes, 0.5%	--	none
43543	protein acylation	0 out of 251 genes, 0%	66 of 6338 genes, 1.0%	--	none
10324	membrane invagination	0 out of 251 genes, 0%	50 of 6338 genes, 0.8%	--	none
1403	invasive growth in response to glucose limitation	0 out of 251 genes, 0%	59 of 6338 genes, 0.9%	--	none
6352	DNA-templated transcription, initiation	0 out of 251 genes, 0%	71 of 6338 genes, 1.1%	--	none
43934	sporulation	0 out of 251 genes, 0%	133 of 6338 genes, 2.1%	--	none
32196	transposition	0 out of 251 genes, 0%	110 of 6338 genes, 1.7%	--	none
6897	endocytosis	0 out of 251 genes, 0%	97 of 6338 genes, 1.5%	--	none
6497	protein lipidation	0 out of 251 genes, 0%	45 of 6338 genes, 0.7%	--	none
7031	peroxisome organization	0 out of 251 genes, 0%	70 of 6338 genes, 1.1%	--	none
6887	exocytosis	0 out of 251 genes, 0%	48 of 6338 genes, 0.8%	--	none
6869	lipid transport	0 out of 251 genes, 0%	65 of 6338 genes, 1.0%	--	none
9311	oligosaccharide metabolic process	0 out of 251 genes, 0%	31 of 6338 genes, 0.5%	--	none
16050	vesicle organization	0 out of 251 genes, 0%	72 of 6338 genes, 1.1%	--	none
6997	nucleus organization	0 out of 251 genes, 0%	66 of 6338 genes, 1.0%	--	none
other	other	3 out of 251 genes, 1.2%	--	--	ARO4,PGA3,RRB1
Component
GOID	GO term	Frequency	Genome Frequency	Corrected hypergeometric test (p-val)	Gene(s)
5840	ribosome	114 out of 251 genes, 45.4%	358 of 6338 genes, 5.6%	1.32176e-78	RBG1,RPL19B,RPL23A,RPL32,RPL4A,RPL19A,RPS6B,RPL21A,REI1,RPS14A,RSA4,NOP1,RPS29B,RPL31A,RPL13A,RPS16B,RPP1B,RPL35A,RPL4B,RPS11A,RSM10,RPS13,ARX1,RPS18A,RPL27B,RPL12A,ARB1,RPS24A,RPS8B,RPL23B,RPS26B,RPL22B,RPL2A,RPL30,MRH4,RPL7A,RPS2,RPL1B,RPL9A,RPL26B,MRP13,RPL11B,RPL24B,RPS0A,ZUO1,RPL14B,RPS20,RPL8A,RPL27A,RPS27B,RPS4B,RPL2B,RPL34B,RPS24B,RPL16A,SQT1,MRPL49,ALB1,RPL17B,RPL39,RPS22A,RPS14B,RPL43B,…
5730	nucleolus	51 out of 251 genes, 20.3%	329 of 6338 genes, 5.2%	9.52279e-17	MAK16,KRR1,PWP2,RSA4,YCR087C-A,NOP1,LHP1,TSR1,NHP2,NOP6,RRP1,ARX1,RPA14,UTP5,NSA1,NOP7,NSR1,ZUO1,RRP3,SSF1,RPF1,GAR1,RRT14,MRT4,EBP2,RPF2,SRP40,DRS1,EMG1,PWP1,DBP9,FPR3,UTP14,RPL15B,RRB1,HAS1,NOP2,RPC19,KRE33,NOP13,RPA49,DBP6,RCL1,UTP23,PNO1,YTM1,RRS1,NOG1,NAN1,RPL7B,NIP7
16020	membrane	17 out of 251 genes, 6.8%	1618 of 6338 genes, 25.5%	8.33544e-14	CDS1,BAP2,SSB1,TRM1,ATO3,KAP123,MDJ1,YHL008C,ERC1,NUC1,MAK11,LTV1,PAM18,INA1,PGA3,HXT2,MDM38
12505	endomembrane system	8 out of 251 genes, 3.2%	977 of 6338 genes, 15.4%	3.07721e-09	CDS1,BAP2,TRM1,KAP123,NSR1,LTV1,PGA3,HAS1
5783	endoplasmic reticulum	3 out of 251 genes, 1.2%	615 of 6338 genes, 9.7%	3.65491e-07	CDS1,BAP2,PGA3
5575	cellular component unknown	4 out of 251 genes, 1.6%	589 of 6338 genes, 9.3%	6.68806e-06	HIS1,AIM32,YMR265C,YOL014W
5737	cytoplasm	199 out of 251 genes, 79.3%	4301 of 6338 genes, 67.9%	0.000315751	ATS1,RBG1,RPL19B,PRS4,RPL23A,RPL32,CDS1,RPL4A,BAP2,RPL19A,RPS6B,RPL21A,ARO4,SHM1,REI1,RPS14A,YCR051W,PWP2,RSA4,NOP1,SLM3,KNH1,TSR1,RPS29B,RPL31A,RPL13A,RPS16B,RRP42,TRM3,RPP1B,RPL35A,HEM3,SSB1,RPL4B,RPS11A,RSM10,RPS13,ARX1,TRM1,ATO3,RRP17,RPS18A,RMT2,RPL27B,RPL12A,ARB1,SAH1,RPS24A,RPS8B,KAP123,RPL23B,RPS26B,YER156C,MDJ1,RPL22B,RPL2A,RPL30,MRH4,RPL7A,RPS2,RPL1B,RPL9A,MTO1,HXK2,RPL26B,MRP13,RPL11B,…
5694	chromosome	3 out of 251 genes, 1.2%	382 of 6338 genes, 6.0%	0.00215178	UTP5,KAE1,NAN1
5773	vacuole	8 out of 251 genes, 3.2%	564 of 6338 genes, 8.9%	0.00378161	KNH1,RPP1B,YHL008C,LTV1,YLR042C,TRX1,INA1,HXT2
5856	cytoskeleton	1 out of 251 genes, 0.4%	200 of 6338 genes, 3.2%	0.0531147	EMG1
5886	plasma membrane	6 out of 251 genes, 2.4%	392 of 6338 genes, 6.2%	0.060183	BAP2,SSB1,ATO3,INA1,PGA3,HXT2
5740	mitochondrial envelope	5 out of 251 genes, 2%	355 of 6338 genes, 5.6%	0.0624055	MDJ1,NUC1,PAM18,TRX1,MDM38
5739	mitochondrion	32 out of 251 genes, 12.7%	1175 of 6338 genes, 18.5%	0.0738315	SHM1,SLM3,RSM10,TRM1,ATO3,RPS18A,RPS24A,MDJ1,MRH4,MTO1,HXK2,MRP13,NSR1,TIF4631,ZUO1,FYV4,MMF1,MAM33,MRPL49,NUC1,TMA19,RPL40B,PAM18,TRX1,MDN1,ILV5,RPS18B,ILV2,MDM38,UTP23,MRM1,ALD6
5634	nucleus	93 out of 251 genes, 37.1%	2207 of 6338 genes, 34.8%	0.920964	MAK16,HMT1,ARO4,KRR1,YCR051W,PWP2,RSA4,YCR087C-A,NOP1,LHP1,TSR1,RRP42,HEM3,NHP2,NOP6,RRP1,ARX1,TRM1,RPA14,UTP5,RMT2,CWC21,ARB1,KAP123,RPL23B,YER156C,NSA1,HXK2,NOP7,NSR1,ELP2,ZPR1,SDA1,ZUO1,RRP3,SSF1,RRP4,RPF1,GAR1,HIS6,RRT14,ALB1,NUC1,TAH11,LIA1,NPA3,ADO1,MRT4,LTV1,EBP2,KAE1,RPF2,SRP40,DRS1,TRX1,MDN1,RNH203,EMG1,PWP1,DBP9,DUS3,TRM9,APT1,FPR3,DUS1,UTP14,RPL15B,RRB1,HAS1,NOP2,RPC19,KRE33,NOP13,IPI3…
16023	cytoplasmic, membrane-bounded vesicle	1 out of 251 genes, 0.4%	105 of 6338 genes, 1.7%	1.40421	CDS1
5618	cell wall	2 out of 251 genes, 0.8%	98 of 6338 genes, 1.5%	3.53196	KNH1,YLR042C
5576	extracellular region	1 out of 251 genes, 0.4%	31 of 6338 genes, 0.5%	8.41726	KNH1
5938	cell cortex	0 out of 251 genes, 0%	146 of 6338 genes, 2.3%	--	none
5815	microtubule organizing center	0 out of 251 genes, 0%	73 of 6338 genes, 1.2%	--	none
5933	cellular bud	0 out of 251 genes, 0%	240 of 6338 genes, 3.8%	--	none
30427	site of polarized growth	0 out of 251 genes, 0%	261 of 6338 genes, 4.1%	--	none
5777	peroxisome	0 out of 251 genes, 0%	75 of 6338 genes, 1.2%	--	none
5794	Golgi apparatus	0 out of 251 genes, 0%	199 of 6338 genes, 3.1%	--	none
other	other	3 out of 251 genes, 1.2%	--	--	ASP1,RPL34A,DIM1
Note: Only S. uvarum genes that have S. cerevisiae homologs are included in this GO-term analysis, but the background gene set was not adjusted. GO-term analysis was conducted using SGD GO-Slim Mapper (http://www.yeastgenome.org/cgi-bin/GO/goSlimMapper.pl). Hypergeometric test was corrected by multipling by the number of terms in each category (e.g. process).

## Sheet: GOslim_14h_DnMut
GO-Slim Mapper results for genes that are two-folds down-regulated in S. uvarum gal80∆ gal80b∆ relative to wild-type at FDR=0.05 after the growth resumed (mid-log phase)
Function
GOID	GO term	Frequency	Genome Frequency	Corrected hypergeometric test (p-val)	Gene(s)
3723	RNA binding	2 out of 130 genes, 1.5%	844 of 6338 genes, 13.3%	6.33955e-05	LYS1,TIS11
16491	oxidoreductase activity	19 out of 130 genes, 14.6%	281 of 6338 genes, 4.4%	0.000123833	GRX7,TRX3,FRD1,ARG5,6,RNR1,GND2,LYS1,GTT1,BNA2,YJR096W,FRE6,HMX1,FRE1,ALD3,ALD2,SCS7,SPS19,LYS9,FRE3
22857	transmembrane transporter activity	17 out of 130 genes, 13.1%	319 of 6338 genes, 5.0%	0.00762189	YBR241C,CCC2,SIT1,PIC2,TPO2,TNA1,VMR1,ARN1,SMF3,THI7,CTR3,PHO84,FET4,MEP2,CRC1,PMA2,CTR1
16798	hydrolase activity, acting on glycosyl bonds	5 out of 130 genes, 3.8%	47 of 6338 genes, 0.7%	0.0980125	YPC1,MAG1,AMS1,DSE2,CTS1
5198	structural molecule activity	2 out of 130 genes, 1.5%	350 of 6338 genes, 5.5%	0.753198	CIS3,ATG11
3674	molecular function unknown	33 out of 130 genes, 25.4%	1849 of 6338 genes, 29.2%	2.21823	ECM15,YBL029W,MOH1,YRO2,YBR285W,ATG22,YCL049C,PET18,HSP30,GPM2,MRH1,YDR089W,COX26,HVG1,SPO73,DSE1,RGI2,YIL067C,YJL132W,YJL133C-A,FMP33,MHO1,YJR061W,YKR075C,YMR018W,YET2,EGO4,SIA1,PNS1,CTF19,VTC3,UIP4,PBI1
16740	transferase activity	20 out of 130 genes, 15.4%	831 of 6338 genes, 13.1%	3.22461	TKL2,YPC1,CIT2,ARG5,6,TMT1,BNA6,TOS3,UGA1,NQM1,GTT1,BIO3,THI20,YGK3,ARG8,DIA2,THI80,ELC1,EEB1,THI6,THI21
16829	lyase activity	4 out of 130 genes, 3.1%	90 of 6338 genes, 1.4%	3.33753	ARO10,ENO1,PDC5,GAD1
16787	hydrolase activity	19 out of 130 genes, 14.6%	870 of 6338 genes, 13.7%	4.19955	YPC1,CCC2,PPN1,MAG1,AMS1,VMR1,DSE2,CRR1,BNA5,CTS1,PLB1,YPT53,YNL217W,THI20,RSB1,DCS2,PMA2,EEB1,RNY1
16301	kinase activity	6 out of 130 genes, 4.6%	195 of 6338 genes, 3.1%	4.64032	ARG5,6,TOS3,THI20,YGK3,THI6,THI21
3677	DNA binding	8 out of 130 genes, 6.2%	389 of 6338 genes, 6.1%	6.40569	THI2,YHP1,ACA1,MAG1,TOS8,PHD1,DIA2,CMR3
16887	ATPase activity	4 out of 130 genes, 3.1%	263 of 6338 genes, 4.1%	7.13382	CCC2,VMR1,RSB1,PMA2
4518	nuclease activity	1 out of 130 genes, 0.8%	137 of 6338 genes, 2.2%	7.31388	RNY1
3729	mRNA binding	2 out of 130 genes, 1.5%	172 of 6338 genes, 2.7%	8.02012	LYS1,TIS11
30234	enzyme regulator activity	4 out of 130 genes, 3.1%	232 of 6338 genes, 3.7%	8.23261	GIP1,IGO2,FAR1,GAL80
1071	nucleic acid binding transcription factor activity	2 out of 130 genes, 1.5%	163 of 6338 genes, 2.6%	8.69532	ACA1,PHD1
988	transcription factor activity, protein binding	1 out of 130 genes, 0.8%	124 of 6338 genes, 2%	8.69768	YHP1
3682	chromatin binding	3 out of 130 genes, 2.3%	107 of 6338 genes, 1.7%	8.81062	TOS8,PDP3,ELG1
43167	ion binding	3 out of 130 genes, 2.3%	183 of 6338 genes, 2.9%	9.23584	CCC2,THI4,TDA10
8289	lipid binding	1 out of 130 genes, 0.8%	101 of 6338 genes, 1.6%	11.4668	PRY1
16757	transferase activity, transferring glycosyl groups	1 out of 130 genes, 0.8%	96 of 6338 genes, 1.5%	12.0991	BNA6
16874	ligase activity	2 out of 130 genes, 1.5%	97 of 6338 genes, 1.5%	12.1272	ATG7,ARG1
16791	phosphatase activity	1 out of 130 genes, 0.8%	94 of 6338 genes, 1.5%	12.3522	YNL217W
8168	methyltransferase activity	1 out of 130 genes, 0.8%	90 of 6338 genes, 1.4%	12.8561	TMT1
8134	transcription factor binding	1 out of 130 genes, 0.8%	69 of 6338 genes, 1.1%	15.2633	GAL80
19899	enzyme binding	1 out of 130 genes, 0.8%	66 of 6338 genes, 1.0%	15.5391	GIP1
3924	GTPase activity	1 out of 130 genes, 0.8%	63 of 6338 genes, 1%	15.7866	YPT53
4871	signal transducer activity	1 out of 130 genes, 0.8%	38 of 6338 genes, 0.6%	15.9879	GPG1
8565	protein transporter activity	1 out of 130 genes, 0.8%	51 of 6338 genes, 0.8%	16.3931	WSC4
30674	protein binding, bridging	0 out of 130 genes, 0%	61 of 6338 genes, 1%	--	none
8092	cytoskeletal protein binding	0 out of 130 genes, 0%	67 of 6338 genes, 1.1%	--	none
16779	nucleotidyltransferase activity	0 out of 130 genes, 0%	121 of 6338 genes, 1.9%	--	none
3735	structural constituent of ribosome	0 out of 130 genes, 0%	231 of 6338 genes, 3.6%	--	none
19843	rRNA binding	0 out of 130 genes, 0%	104 of 6338 genes, 1.6%	--	none
8233	peptidase activity	0 out of 130 genes, 0%	138 of 6338 genes, 2.2%	--	none
51082	unfolded protein binding	0 out of 130 genes, 0%	70 of 6338 genes, 1.1%	--	none
30533	triplet codon-amino acid adaptor activity	0 out of 130 genes, 0%	299 of 6338 genes, 4.7%	--	none
5085	guanyl-nucleotide exchange factor activity	0 out of 130 genes, 0%	46 of 6338 genes, 0.7%	--	none
30555	RNA modification guide activity	0 out of 130 genes, 0%	71 of 6338 genes, 1.1%	--	none
42393	histone binding	0 out of 130 genes, 0%	41 of 6338 genes, 0.6%	--	none
4386	helicase activity	0 out of 130 genes, 0%	86 of 6338 genes, 1.4%	--	none
16853	isomerase activity	0 out of 130 genes, 0%	59 of 6338 genes, 0.9%	--	none
8135	translation factor activity, RNA binding	0 out of 130 genes, 0%	43 of 6338 genes, 0.7%	--	none
32182	ubiquitin-like protein binding	0 out of 130 genes, 0%	43 of 6338 genes, 0.7%	--	none
other	other	4 out of 130 genes, 3.1%	--	--	MFA1,THI73,MFA2,NCR1
Process
GOID	GO term	Frequency	Genome Frequency	Corrected hypergeometric test (p-val)	Gene(s)
6520	cellular amino acid metabolic process	15 out of 130 genes, 11.5%	210 of 6338 genes, 3.3%	0.0017468	CIT2,ARO10,ARG5,6,BNA6,UGA1,LYS1,BNA2,PDC5,BNA5,ALD3,ALD2,GAD1,LYS9,ARG1,ARG8
6766	vitamin metabolic process	7 out of 130 genes, 5.4%	43 of 6338 genes, 0.7%	0.00208413	THI2,PET18,THI4,BIO3,THI20,THI6,THI21
6811	ion transport	16 out of 130 genes, 12.3%	240 of 6338 genes, 3.8%	0.00211275	ATG22,CCC2,PIC2,TPO2,TNA1,FRE6,SMF3,FRE1,CTR3,PHO84,FET4,MEP2,RSB1,SIA1,PMA2,CTR1
51186	cofactor metabolic process	10 out of 130 genes, 7.7%	178 of 6338 genes, 2.8%	0.245466	TKL2,BNA6,ENO1,GND2,BNA2,PDC5,HMX1,BNA5,BIO3,THI80
6873	cellular ion homeostasis	8 out of 130 genes, 6.2%	124 of 6338 genes, 2%	0.287731	CCC2,SIT1,PIC2,FRE6,SMF3,TIS11,HMX1,FRE3
6979	response to oxidative stress	7 out of 130 genes, 5.4%	101 of 6338 genes, 1.6%	0.35231	GRX7,HSP30,TRX3,NQM1,YJR096W,HMX1,GAD1
32787	monocarboxylic acid metabolic process	8 out of 130 genes, 6.2%	134 of 6338 genes, 2.1%	0.446571	CIT2,UGA1,ENO1,PDC5,SPS19,BIO3,CRC1,EEB1
6325	chromatin organization	1 out of 130 genes, 0.8%	317 of 6338 genes, 5.0%	0.834666	DIA2
7005	mitochondrion organization	3 out of 130 genes, 2.3%	420 of 6338 genes, 6.6%	1.67537	THI4,ATG7,ATG11
8150	biological process unknown	28 out of 130 genes, 21.5%	1049 of 6338 genes, 16.6%	2.85045	ECM15,YBL029W,MOH1,YRO2,YBR285W,YCL049C,GPM2,MRH1,COX26,HVG1,TMT1,TOS8,TDA10,YIL067C,YJL132W,YJL133C-A,FMP33,MHO1,YJR061W,YKR075C,YMR018W,YET2,YNL217W,EGO4,PNS1,UIP4,PBI1,CMR3
55085	transmembrane transport	9 out of 130 genes, 6.9%	236 of 6338 genes, 3.7%	3.04042	YBR241C,ATG22,CCC2,SIT1,PIC2,TNA1,THI7,PHO84,FET4
55086	nucleobase-containing small molecule metabolic process	8 out of 130 genes, 6.2%	201 of 6338 genes, 3.2%	3.22714	TKL2,RNR1,BNA6,ENO1,GND2,BNA2,PDC5,BNA5
48285	organelle fission	2 out of 130 genes, 1.5%	297 of 6338 genes, 4.7%	3.89081	ELG1,CTF19
33043	regulation of organelle organization	2 out of 130 genes, 1.5%	289 of 6338 genes, 4.6%	4.37154	ENO1,CTF19
10324	membrane invagination	3 out of 130 genes, 2.3%	50 of 6338 genes, 0.8%	6.4237	ATG7,VTC3,ATG11
278	mitotic cell cycle	3 out of 130 genes, 2.3%	319 of 6338 genes, 5.0%	6.42856	YHP1,ELG1,CTF19
6366	transcription from RNA polymerase II promoter	6 out of 130 genes, 4.6%	477 of 6338 genes, 7.5%	6.62739	THI2,YHP1,ACA1,PHD1,PDP3,GAL80
42221	response to chemical	12 out of 130 genes, 9.2%	440 of 6338 genes, 6.9%	7.51457	GRX7,HSP30,TRX3,MFA1,FRD1,DSE1,NQM1,VMR1,FAR1,YJR096W,GAD1,MFA2
48193	Golgi vesicle transport	1 out of 130 genes, 0.8%	190 of 6338 genes, 3%	7.605	YPT53
1403	invasive growth in response to glucose limitation	3 out of 130 genes, 2.3%	59 of 6338 genes, 0.9%	8.86603	DSE1,GPG1,DIA2
6310	DNA recombination	1 out of 130 genes, 0.8%	174 of 6338 genes, 2.7%	9.77331	ELG1
5975	carbohydrate metabolic process	7 out of 130 genes, 5.4%	255 of 6338 genes, 4.0%	11.7423	CIT2,AMS1,TOS3,ENO1,YJR096W,PDC5,GAL80
9408	response to heat	3 out of 130 genes, 2.3%	70 of 6338 genes, 1.1%	11.9216	HSP30,WSC4,YGK3
6605	protein targeting	4 out of 130 genes, 3.1%	305 of 6338 genes, 4.8%	12.2839	WSC4,ATG7,YPT53,ATG11
51726	regulation of cell cycle	2 out of 130 genes, 1.5%	209 of 6338 genes, 3.3%	12.4926	FAR1,CTF19
6974	cellular response to DNA damage stimulus	4 out of 130 genes, 3.1%	298 of 6338 genes, 4.7%	12.9694	HSP30,MAG1,ELG1,ELC1
7124	pseudohyphal growth	3 out of 130 genes, 2.3%	74 of 6338 genes, 1.2%	13.0077	DSE2,PHD1,MEP2
51603	proteolysis involved in cellular protein catabolic process	3 out of 130 genes, 2.3%	249 of 6338 genes, 3.9%	13.4481	DIA2,CTF19,ELC1
6281	DNA repair	3 out of 130 genes, 2.3%	245 of 6338 genes, 3.9%	13.9341	MAG1,ELG1,ELC1
6468	protein phosphorylation	2 out of 130 genes, 1.5%	199 of 6338 genes, 3.1%	13.9809	TOS3,YGK3
6629	lipid metabolic process	7 out of 130 genes, 5.4%	286 of 6338 genes, 4.5%	14.0207	YPC1,PLB1,SCS7,SPS19,CRC1,NCR1,EEB1
746	conjugation	4 out of 130 genes, 3.1%	124 of 6338 genes, 2%	14.0444	MFA1,DSE1,FAR1,MFA2
7059	chromosome segregation	2 out of 130 genes, 1.5%	197 of 6338 genes, 3.1%	14.2902	ELG1,CTF19
51321	meiotic cell cycle	4 out of 130 genes, 3.1%	279 of 6338 genes, 4.4%	14.8436	GIP1,SPO73,CRR1,SPS19
43934	sporulation	4 out of 130 genes, 3.1%	133 of 6338 genes, 2.1%	15.5078	GIP1,SPO73,CRR1,SPS19
7033	vacuole organization	3 out of 130 genes, 2.3%	92 of 6338 genes, 1.5%	17.4198	ENO1,VTC3,ATG11
23052	signaling	5 out of 130 genes, 3.8%	240 of 6338 genes, 3.8%	18.252	MFA1,DSE1,GPG1,FAR1,MFA2
70925	organelle assembly	1 out of 130 genes, 0.8%	128 of 6338 genes, 2.0%	18.95	ATG11
71554	cell wall organization or biogenesis	4 out of 130 genes, 3.1%	200 of 6338 genes, 3.2%	20.2185	GIP1,SPO73,CIS3,CRR1
6260	DNA replication	2 out of 130 genes, 1.5%	150 of 6338 genes, 2.4%	22.1746	DIA2,ELG1
70647	protein modification by small protein conjugation or removal	3 out of 130 genes, 2.3%	169 of 6338 genes, 2.7%	22.3186	ATG7,DIA2,ELC1
31399	regulation of protein modification process	1 out of 130 genes, 0.8%	115 of 6338 genes, 1.8%	22.3603	GIP1
6401	RNA catabolic process	3 out of 130 genes, 2.3%	132 of 6338 genes, 2.1%	22.7912	TIS11,DCS2,RNY1
6091	generation of precursor metabolites and energy	3 out of 130 genes, 2.3%	153 of 6338 genes, 2.4%	23.0468	ENO1,RGI2,PDC5
32196	transposition	1 out of 130 genes, 0.8%	110 of 6338 genes, 1.7%	23.7486	ELG1
6869	lipid transport	2 out of 130 genes, 1.5%	65 of 6338 genes, 1.0%	24.0938	PRY1,RSB1
16197	endosomal transport	1 out of 130 genes, 0.8%	102 of 6338 genes, 1.6%	26.0322	YPT53
61025	membrane fusion	2 out of 130 genes, 1.5%	75 of 6338 genes, 1.2%	26.1521	ENO1,VTC3
6897	endocytosis	1 out of 130 genes, 0.8%	97 of 6338 genes, 1.5%	27.4822	YPT53
51052	regulation of DNA metabolic process	2 out of 130 genes, 1.5%	107 of 6338 genes, 1.7%	27.5557	DIA2,ELG1
48284	organelle fusion	2 out of 130 genes, 1.5%	88 of 6338 genes, 1.4%	27.5753	ENO1,VTC3
6970	response to osmotic stress	2 out of 130 genes, 1.5%	91 of 6338 genes, 1.4%	27.7228	HSP30,YGK3
6354	DNA-templated transcription, elongation	1 out of 130 genes, 0.8%	96 of 6338 genes, 1.5%	27.7729	PDP3
32200	telomere organization	1 out of 130 genes, 0.8%	77 of 6338 genes, 1.2%	33.1039	ELG1
902	cell morphogenesis	1 out of 130 genes, 0.8%	29 of 6338 genes, 0.5%	33.7345	RNY1
9311	oligosaccharide metabolic process	1 out of 130 genes, 0.8%	31 of 6338 genes, 0.5%	34.6013	AMS1
7031	peroxisome organization	1 out of 130 genes, 0.8%	70 of 6338 genes, 1.1%	34.8127	ATG11
42594	response to starvation	1 out of 130 genes, 0.8%	56 of 6338 genes, 0.9%	37.2489	DCS2
6865	amino acid transport	1 out of 130 genes, 0.8%	42 of 6338 genes, 0.7%	37.3402	ATG22
6497	protein lipidation	1 out of 130 genes, 0.8%	45 of 6338 genes, 0.7%	37.5979	ATG7
6470	protein dephosphorylation	1 out of 130 genes, 0.8%	49 of 6338 genes, 0.8%	37.6841	GIP1
910	cytokinesis	0 out of 130 genes, 0%	81 of 6338 genes, 1.3%	--	none
7010	cytoskeleton organization	0 out of 130 genes, 0%	237 of 6338 genes, 3.7%	--	none
6397	mRNA processing	0 out of 130 genes, 0%	175 of 6338 genes, 2.8%	--	none
45333	cellular respiration	0 out of 130 genes, 0%	83 of 6338 genes, 1.3%	--	none
6360	transcription from RNA polymerase I promoter	0 out of 130 genes, 0%	66 of 6338 genes, 1.0%	--	none
8213	protein alkylation	0 out of 130 genes, 0%	50 of 6338 genes, 0.8%	--	none
6457	protein folding	0 out of 130 genes, 0%	95 of 6338 genes, 1.5%	--	none
6383	transcription from RNA polymerase III promoter	0 out of 130 genes, 0%	41 of 6338 genes, 0.6%	--	none
9451	RNA modification	0 out of 130 genes, 0%	170 of 6338 genes, 2.7%	--	none
6413	translational initiation	0 out of 130 genes, 0%	61 of 6338 genes, 1%	--	none
8380	RNA splicing	0 out of 130 genes, 0%	144 of 6338 genes, 2.3%	--	none
6352	DNA-templated transcription, initiation	0 out of 130 genes, 0%	71 of 6338 genes, 1.1%	--	none
42255	ribosome assembly	0 out of 130 genes, 0%	56 of 6338 genes, 0.9%	--	none
6414	translational elongation	0 out of 130 genes, 0%	333 of 6338 genes, 5.3%	--	none
15931	nucleobase-containing compound transport	0 out of 130 genes, 0%	123 of 6338 genes, 1.9%	--	none
6353	DNA-templated transcription, termination	0 out of 130 genes, 0%	43 of 6338 genes, 0.7%	--	none
32543	mitochondrial translation	0 out of 130 genes, 0%	167 of 6338 genes, 2.6%	--	none
42274	ribosomal small subunit biogenesis	0 out of 130 genes, 0%	135 of 6338 genes, 2.1%	--	none
16050	vesicle organization	0 out of 130 genes, 0%	72 of 6338 genes, 1.1%	--	none
8033	tRNA processing	0 out of 130 genes, 0%	106 of 6338 genes, 1.7%	--	none
16570	histone modification	0 out of 130 genes, 0%	114 of 6338 genes, 1.8%	--	none
6997	nucleus organization	0 out of 130 genes, 0%	66 of 6338 genes, 1.0%	--	none
6486	protein glycosylation	0 out of 130 genes, 0%	62 of 6338 genes, 1%	--	none
8643	carbohydrate transport	0 out of 130 genes, 0%	33 of 6338 genes, 0.5%	--	none
51049	regulation of transport	0 out of 130 genes, 0%	88 of 6338 genes, 1.4%	--	none
51604	protein maturation	0 out of 130 genes, 0%	49 of 6338 genes, 0.8%	--	none
6364	rRNA processing	0 out of 130 genes, 0%	311 of 6338 genes, 4.9%	--	none
43543	protein acylation	0 out of 130 genes, 0%	66 of 6338 genes, 1.0%	--	none
2181	cytoplasmic translation	0 out of 130 genes, 0%	179 of 6338 genes, 2.8%	--	none
51169	nuclear transport	0 out of 130 genes, 0%	177 of 6338 genes, 2.8%	--	none
70271	protein complex biogenesis	0 out of 130 genes, 0%	329 of 6338 genes, 5.2%	--	none
7114	cell budding	0 out of 130 genes, 0%	58 of 6338 genes, 0.9%	--	none
48308	organelle inheritance	0 out of 130 genes, 0%	58 of 6338 genes, 0.9%	--	none
18193	peptidyl-amino acid modification	0 out of 130 genes, 0%	150 of 6338 genes, 2.4%	--	none
6887	exocytosis	0 out of 130 genes, 0%	48 of 6338 genes, 0.8%	--	none
42273	ribosomal large subunit biogenesis	0 out of 130 genes, 0%	103 of 6338 genes, 1.6%	--	none
43144	snoRNA processing	0 out of 130 genes, 0%	45 of 6338 genes, 0.7%	--	none
6418	tRNA aminoacylation for protein translation	0 out of 130 genes, 0%	36 of 6338 genes, 0.6%	--	none
6417	regulation of translation	0 out of 130 genes, 0%	104 of 6338 genes, 1.6%	--	none
54	ribosomal subunit export from nucleus	0 out of 130 genes, 0%	46 of 6338 genes, 0.7%	--	none
other	other	7 out of 130 genes, 5.4%	--	--	YDR089W,PPN1,ARN1,IGO2,GTT1,THI73,CTS1
Component
GOID	GO term	Frequency	Genome Frequency	Corrected hypergeometric test (p-val)	Gene(s)
5773	vacuole	30 out of 130 genes, 23.1%	564 of 6338 genes, 8.9%	1.18604e-05	GRX7,YBR241C,ATG22,YDR089W,PPN1,SIT1,AMS1,TPO2,ENO1,TNA1,VMR1,ARN1,DSE2,YIL067C,PRY1,YJL132W,CIS3,FRE6,SMF3,CRR1,CTS1,PHO84,FET4,YPT53,YNL217W,RSB1,FRE3,NCR1,VTC3,RNY1
5576	extracellular region	7 out of 130 genes, 5.4%	31 of 6338 genes, 0.5%	4.90643e-05	MFA1,DSE2,PRY1,CIS3,CTS1,MFA2,RNY1
5886	plasma membrane	23 out of 130 genes, 17.7%	392 of 6338 genes, 6.2%	6.04082e-05	YRO2,HSP30,MRH1,FRD1,TPO2,ENO1,GND2,TNA1,ARN1,GTT1,CIS3,FRE1,THI7,CTR3,PHO84,PLB1,FET4,MEP2,RSB1,PNS1,FRE3,PMA2,CTR1
16020	membrane	56 out of 130 genes, 43.1%	1618 of 6338 genes, 25.5%	0.000107706	GRX7,GIP1,YRO2,YPC1,YBR241C,ATG22,YCL049C,HSP30,MRH1,YDR089W,COX26,CCC2,PPN1,FRD1,SIT1,HVG1,SPO73,PIC2,AMS1,TPO2,ENO1,GND2,TNA1,WSC4,VMR1,ARN1,ATG7,YIL067C,GTT1,YJL132W,FAR1,CIS3,FRE6,THI73,SMF3,HMX1,FRE1,THI7,CTR3,PHO84,PLB1,YET2,SCS7,FET4,MEP2,YNL217W,RSB1,CRC1,PNS1,FRE3,NCR1,VTC3,PMA2,UIP4,ATG11,CTR1
5737	cytoplasm	103 out of 130 genes, 79.2%	4301 of 6338 genes, 67.9%	0.0285076	ECM15,YBL029W,GRX7,GIP1,YRO2,TKL2,YPC1,YBR241C,ATG22,CIT2,PET18,HSP30,TRX3,GPM2,MRH1,YDR089W,COX26,CCC2,ARO10,PPN1,MFA1,FRD1,SIT1,HVG1,SPO73,PIC2,ARG5,6,RNR1,TMT1,BNA6,AMS1,TOS3,UGA1,TPO2,THI4,TDA10,ENO1,GND2,TNA1,WSC4,VMR1,ARN1,IGO2,DSE2,ATG7,RGI2,YIL067C,LYS1,GTT1,PRY1,YJL132W,YJL133C-A,FAR1,CIS3,FMP33,MHO1,BNA2,YJR096W,YKR075C,FRE6,THI73,SMF3,PDC5,TIS11,HMX1,CRR1,BNA5,CTS1,CTR3,PDP3,GAL80,PHO8…
5783	endoplasmic reticulum	23 out of 130 genes, 17.7%	615 of 6338 genes, 9.7%	0.0390769	YRO2,YPC1,HSP30,MRH1,MFA1,HVG1,WSC4,GTT1,PRY1,CIS3,THI73,HMX1,CTS1,CTR3,PHO84,PLB1,YET2,SCS7,MFA2,RSB1,NCR1,VTC3,UIP4
5634	nucleus	34 out of 130 genes, 26.2%	2207 of 6338 genes, 34.8%	0.184968	ECM15,YBL029W,TKL2,THI2,YHP1,PPN1,ACA1,RNR1,MAG1,BNA6,TOS8,NQM1,TDA10,ARN1,IGO2,PRY1,FAR1,MHO1,YJR096W,PHD1,YKR075C,PDC5,TIS11,HMX1,BNA5,CTS1,PDP3,GAL80,DIA2,ELG1,CTF19,ELC1,UIP4,CTR1
12505	endomembrane system	28 out of 130 genes, 21.5%	977 of 6338 genes, 15.4%	0.34724	GRX7,YRO2,YPC1,HSP30,MRH1,CCC2,MFA1,SIT1,HVG1,WSC4,ARN1,GTT1,PRY1,CIS3,THI73,HMX1,CTS1,CTR3,PHO84,PLB1,YET2,SCS7,YPT53,MFA2,RSB1,NCR1,VTC3,UIP4
5840	ribosome	3 out of 130 genes, 2.3%	358 of 6338 genes, 5.6%	0.899258	FRD1,VMR1,YET2
5739	mitochondrion	20 out of 130 genes, 15.4%	1175 of 6338 genes, 18.5%	1.41772	YRO2,CIT2,TRX3,MRH1,COX26,FRD1,PIC2,ARG5,6,ENO1,TNA1,VMR1,ATG7,GTT1,YJL133C-A,FMP33,ARG8,CRC1,ELG1,PMA2,UIP4
5740	mitochondrial envelope	4 out of 130 genes, 3.1%	355 of 6338 genes, 5.6%	1.78426	COX26,GTT1,CRC1,UIP4
5618	cell wall	4 out of 130 genes, 3.1%	98 of 6338 genes, 1.5%	2.09526	DSE2,CIS3,CRR1,CTS1
5694	chromosome	5 out of 130 genes, 3.8%	382 of 6338 genes, 6.0%	2.19957	YHP1,TOS8,DIA2,ELG1,CTF19
5575	cellular component unknown	11 out of 130 genes, 8.5%	589 of 6338 genes, 9.3%	2.73946	MOH1,YBR285W,GPG1,YJR061W,YMR018W,YGK3,SIA1,EEB1,THI21,PBI1,CMR3
5794	Golgi apparatus	2 out of 130 genes, 1.5%	199 of 6338 genes, 3.1%	3.18378	GRX7,CCC2
5938	cell cortex	1 out of 130 genes, 0.8%	146 of 6338 genes, 2.3%	3.37157	YPC1
30427	site of polarized growth	4 out of 130 genes, 3.1%	261 of 6338 genes, 4.1%	3.77103	DSE1,FAR1,CIS3,CTS1
5933	cellular bud	4 out of 130 genes, 3.1%	240 of 6338 genes, 3.8%	4.17443	YRO2,DSE1,CIS3,CTS1
16023	cytoplasmic, membrane-bounded vesicle	3 out of 130 genes, 2.3%	105 of 6338 genes, 1.7%	4.53257	CCC2,SIT1,ARN1
5777	peroxisome	2 out of 130 genes, 1.5%	75 of 6338 genes, 1.2%	5.95542	CIT2,SPS19
5815	microtubule organizing center	0 out of 130 genes, 0%	73 of 6338 genes, 1.2%	--	none
5856	cytoskeleton	0 out of 130 genes, 0%	200 of 6338 genes, 3.2%	--	none
5730	nucleolus	0 out of 130 genes, 0%	329 of 6338 genes, 5.2%	--	none
Note: Only S. uvarum genes that have S. cerevisiae homologs are included in this GO-term analysis, but the background gene set was not adjusted. GO-term analysis was conducted using SGD GO-Slim Mapper (http://www.yeastgenome.org/cgi-bin/GO/goSlimMapper.pl). Hypergeometric test was corrected by multipling by the number of terms in each category (e.g. process).
